# Supplementary material for: Heterotrophic Euglenid Rhabdomonas Costata Resembles Its Phototrophic Relatives in Many Aspects of Molecular and Cell Biology
Source: Research Square preprint supplement (doi:10.21203/rs.3.rs-112847/v1), 2020-11-30
Supplement: Supplementary file 2 [file b776c8d72ee59b50840ed684.xlsx]

## Sheet: Legends
Heterotrophic euglenid Rhabdomonas costata resembles its phototrophic relatives in many aspects of molecular and cell biology
Petr Soukal1#, Štěpánka Hrdá1#, Anna Karnkowska2, Rafał Milanowski2, Jana Szabová1, Miluše Hradilová3, Hynek Strnad3, Čestmír Vlček3, Ivan Čepička4 and Vladimír Hampl1*
Legends:
Tab. S1: Statistics of splice leader sequences in euglenids. The table summarises the number of transcripts for which the partial SL was detected in any of their ends for R. costata and other euglenids with available transcriptomes. The rows represent values for various length of the partial SL considered.
Tab. S2: All putative introns identified by transcriptome mapping to genome.
Tab. S3: Putative introns from table S2 for which non-canonical boundaries were predicted.
Tab. S4: Putative 105 introns with nonconventional boundaries verified by transcriptome mapping using STAR.
Tab. S5: 26 putative nonconventional intron present in genes with homologues present in NCI as revealed blastx.
Tab. S6: Manually inspected candidates for non-conventional introns.
Tab. S7: In silico predicted proteome of R. costata mitochondrion.
Tab. S8: Homologs of protein-coding genes reported from the E. gracilis mitochondrial genome

## Sheet: Table S1
	Percentage of transcripts containing SL at one of the ends
minimum length of splice leader	Euglena longa	Euglena gracilis [Ebenezer 2019]	Euglena gracilis [Yoshida 2016]	Eutreptiella gymnastica 0809	Eutreptiella gymnastica 0810	Rhabdomonas costata PANT2
7	28.813	14.6443	24.2841	9.14912	7.34253	20.218
8	28.7823	14.4912	24.2682	8.91665	7.28251	20.0198
9	28.7414	14.3202	24.2435	8.56438	7.18803	19.8877
10	28.5572	13.0734	24.1843	5.88026	6.47668	15.2932
11	28.2649	12.0293	24.1136	4.76496	6.12655	10.9001
12	8.55635	1.62331	22.9417	0.286668	0.130045	10.7499
13	6.51739	0.793038	22.3602	0.255291	0.115595	6.15437
14	4.44042	0.2055	19.3271	0.161162	0.0444598	3.77616
15	3.3822	0.143436	18.6554	0.158309	0.0433483	3.41069
16	0.553956	0.063443	7.21861	0.116949	0.0255644	2.58599
17	0.267477	0.0593054	4.92877	0.102687	0.0233414	1.61531
18	0.146163	0.0482719	1.32653	0.0984084	0.0211184	0
19	0.0920824	0.0372383	0.820136	0.0841463	0.0188954	0
20	0.0833126	0.0331007	0.420673	0.075589	0.0177839	0
21	0.0657731	0.0234463	0.123727	0.0442124	0.0166724	0
22	0.0248476	0.0165504	0.0397695	0.0199669	0.00444598	0
23	0.0219244	0.013792	0.0106052	0.00998346	0.00333448	0
24	0.0190011	0.013792	0.00441883	0.00713104	0.00222299	0
25	0.0160779	0.00965437	0	0.00713104	0.00111149	0
26	0.0131546	0.00413759	0	0.00427862	0	0
27	0.0102314	0.0013792	0	0.00427862	0	0
28	0.00146163	0	0	0.00285242	0	0

## Sheet: Table S2
Transcript ID	Genome contig ID	Intron boundaries (XX/YY)
TR39786|c0_g1_i1	NODE_1_length_8093_cov_3.09426_ID_449390	GTAG
TR39786|c0_g1_i1	NODE_1_length_8093_cov_3.09426_ID_449390	GTAG
TR39786|c0_g1_i1	NODE_1_length_8093_cov_3.09426_ID_449390	GTAG
TR39786|c0_g1_i1	NODE_1_length_8093_cov_3.09426_ID_449390	GTAG
TR54212|c1_g1_i1	NODE_10_length_7119_cov_5.26616_ID_340426	GTAG
TR54212|c1_g1_i1	NODE_10_length_7119_cov_5.26616_ID_340426	GTAG
TR33501|c0_g2_i1	NODE_10_length_7119_cov_5.26616_ID_340426	CTAC
TR33501|c0_g2_i1	NODE_10_length_7119_cov_5.26616_ID_340426	CTAC
TR33501|c0_g2_i1	NODE_10_length_7119_cov_5.26616_ID_340426	CTAC
TR33501|c0_g2_i1	NODE_10_length_7119_cov_5.26616_ID_340426	CTAC
TR33501|c0_g2_i1	NODE_10_length_7119_cov_5.26616_ID_340426	CTAC
TR33501|c0_g2_i1	NODE_10_length_7119_cov_5.26616_ID_340426	CTAC
TR33501|c0_g2_i1	NODE_10_length_7119_cov_5.26616_ID_340426	CTAC
TR33501|c0_g2_i1	NODE_10_length_7119_cov_5.26616_ID_340426	CTAC
TR204|c0_g4_i2	NODE_100_length_5363_cov_4.77612_ID_1904322	GTAG
TR204|c0_g4_i2	NODE_100_length_5363_cov_4.77612_ID_1904322	GTAG
TR25060|c0_g1_i2	NODE_1000_length_3428_cov_1.38019_ID_346434	CTAC
TR25060|c0_g1_i2	NODE_1000_length_3428_cov_1.38019_ID_346434	CTAC
TR38015|c0_g1_i1	NODE_10002_length_1774_cov_8.08257_ID_577068	GTAG
TR10866|c0_g1_i1	NODE_10005_length_1771_cov_1.44323_ID_577146	GTAG
TR4522|c0_g1_i1	NODE_10008_length_1774_cov_6.83485_ID_577198	CTAC
TR4522|c0_g1_i1	NODE_10008_length_1774_cov_6.83485_ID_577198	CTAC
TR7251|c0_g1_i2	NODE_1001_length_3427_cov_6.23545_ID_359609	CTAC
TR7251|c0_g1_i2	NODE_1001_length_3427_cov_6.23545_ID_359609	CTAC
TR40520|c0_g1_i2	NODE_10012_length_1773_cov_5.18469_ID_2284667	CTAC
TR15519|c0_g1_i1	NODE_1002_length_3426_cov_6.26515_ID_346460	CTAC
TR25060|c0_g1_i2	NODE_1002_length_3426_cov_6.26515_ID_346460	CTAC
TR25060|c0_g1_i2	NODE_1002_length_3426_cov_6.26515_ID_346460	CTAC
TR25060|c0_g1_i2	NODE_1002_length_3426_cov_6.26515_ID_346460	CTAC
TR25060|c0_g1_i2	NODE_1002_length_3426_cov_6.26515_ID_346460	CTAC
TR25060|c0_g1_i2	NODE_1002_length_3426_cov_6.26515_ID_346460	CTAC
TR25060|c0_g1_i2	NODE_1002_length_3426_cov_6.26515_ID_346460	CTAC
TR25060|c0_g1_i2	NODE_1002_length_3426_cov_6.26515_ID_346460	CTAC
TR25060|c0_g1_i2	NODE_1002_length_3426_cov_6.26515_ID_346460	CTAC
TR25060|c0_g1_i2	NODE_1002_length_3426_cov_6.26515_ID_346460	CTAC
TR25060|c0_g1_i2	NODE_1002_length_3426_cov_6.26515_ID_346460	CTAC
TR25060|c0_g1_i2	NODE_1002_length_3426_cov_6.26515_ID_346460	CTAC
TR14125|c0_g1_i1	NODE_100209_length_247_cov_11.15_ID_2545171	TTAC
TR27355|c0_g1_i1	NODE_10022_length_1773_cov_7.00972_ID_577562	CTAC
TR25696|c0_g1_i1	NODE_10029_length_1772_cov_7.03465_ID_577770	GTAG
TR53328|c0_g1_i1	NODE_10034_length_1772_cov_1.85653_ID_577874	CTAC
TR21816|c0_g1_i1	NODE_10035_length_1772_cov_16.8602_ID_2464205	GTAG
TR21816|c0_g1_i1	NODE_10035_length_1772_cov_16.8602_ID_2464205	GTAG
TR40551|c0_g1_i1	NODE_10041_length_1771_cov_2.48905_ID_578058	GTAG
TR27119|c0_g1_i1	NODE_10047_length_1769_cov_2.13929_ID_578214	CTAC
TR27119|c0_g1_i1	NODE_10047_length_1769_cov_2.13929_ID_578214	CTAC
TR16300|c0_g1_i1	NODE_10052_length_1771_cov_4.31995_ID_578344	CTAC
TR16300|c0_g1_i1	NODE_10052_length_1771_cov_4.31995_ID_578344	CTAC
TR28394|c1_g1_i1	NODE_1006_length_3421_cov_3.05759_ID_346564	GTAG
TR28394|c1_g1_i1	NODE_1006_length_3421_cov_3.05759_ID_346564	GTAG
TR12078|c4_g14_i1	NODE_10064_length_1770_cov_4.36214_ID_578687	GTAG
TR5531|c0_g1_i1	NODE_10067_length_1770_cov_11.577_ID_578765	GTAG
TR5531|c0_g1_i1	NODE_10067_length_1770_cov_11.577_ID_578765	GTAG
TR36191|c0_g1_i1	NODE_10071_length_1770_cov_5.08886_ID_578843	GCAG
TR36191|c0_g1_i1	NODE_10071_length_1770_cov_5.08886_ID_578843	GTAG
TR41598|c0_g1_i1	NODE_10079_length_1769_cov_2.23508_ID_579051	CTAC
TR20905|c0_g1_i2	NODE_10085_length_1769_cov_4.55238_ID_579233	CAAG
TR13967|c0_g1_i1	NODE_10097_length_1768_cov_4.03169_ID_579519	GTAG
TR1364|c0_g1_i1	NODE_101_length_5362_cov_4.75721_ID_329181	GTAG
TR4909|c1_g1_i1	NODE_101_length_5362_cov_4.75721_ID_329181	CTAC
TR48378|c0_g1_i1	NODE_1010_length_3424_cov_4.51865_ID_346642	GTAG
TR26489|c0_g2_i1	NODE_1010_length_3424_cov_4.51865_ID_346642	CTAC
TR2764|c0_g1_i1	NODE_10101_length_1768_cov_4.26021_ID_2769711	CTGC
TR12341|c0_g1_i1	NODE_10109_length_1767_cov_2.8122_ID_1003448	CTAC
TR50429|c0_g2_i1	NODE_1011_length_3423_cov_6.95388_ID_346668	CTAC
TR50429|c0_g2_i1	NODE_1011_length_3423_cov_6.95388_ID_346668	CTAC
TR4909|c1_g1_i1	NODE_10118_length_1768_cov_4.47073_ID_579987	GTAG
TR48538|c0_g7_i7	NODE_10123_length_1762_cov_2.86943_ID_580117	CTAC
TR13893|c0_g1_i1	NODE_10126_length_1764_cov_2.45821_ID_580221	GTAG
TR13893|c0_g1_i1	NODE_10126_length_1764_cov_2.45821_ID_580221	GTAG
TR488|c0_g1_i1	NODE_10141_length_1765_cov_19.931_ID_580585	GTGC
TR42893|c0_g2_i1	NODE_10142_length_1765_cov_133.415_ID_2651777	CTAC
TR42893|c0_g2_i1	NODE_10142_length_1765_cov_133.415_ID_2651777	CTAC
TR19971|c0_g1_i1	NODE_10145_length_1765_cov_2.83578_ID_580637	GTAG
TR19971|c0_g1_i1	NODE_10145_length_1765_cov_2.83578_ID_580637	GTAG
TR45940|c0_g1_i1	NODE_1015_length_3421_cov_4.11206_ID_346798	GTAG
TR11301|c0_g1_i2	NODE_1015_length_3421_cov_4.11206_ID_346798	CTAC
TR11070|c0_g3_i1	NODE_10162_length_1763_cov_8.54795_ID_581185	GTAG
TR12162|c0_g1_i1	NODE_10163_length_1764_cov_10.2327_ID_581211	CTAC
TR12162|c0_g1_i1	NODE_10163_length_1764_cov_10.2327_ID_581211	CTAC
TR44399|c0_g15_i1	NODE_1017_length_3419_cov_2.79313_ID_346850	CTAC
TR44399|c0_g15_i1	NODE_1017_length_3419_cov_2.79313_ID_346850	CTAC
TR30407|c0_g1_i2	NODE_10173_length_1763_cov_3.78117_ID_581445	CTAC
TR30407|c0_g1_i2	NODE_10173_length_1763_cov_3.78117_ID_581445	CTAC
TR17466|c0_g1_i1	NODE_10175_length_1763_cov_1.84169_ID_581497	CTAC
TR17466|c0_g1_i1	NODE_10175_length_1763_cov_1.84169_ID_581497	CTAC
TR234|c1_g2_i3	NODE_1018_length_3419_cov_7.42892_ID_2793794	CTAC
TR234|c1_g2_i3	NODE_1018_length_3419_cov_7.42892_ID_2793794	CTAC
TR234|c1_g2_i3	NODE_1018_length_3419_cov_7.42892_ID_2793794	CTAC
TR53684|c0_g1_i1	NODE_10189_length_1764_cov_4.82446_ID_2734300	GTAG
TR53684|c0_g1_i1	NODE_10189_length_1764_cov_4.82446_ID_2734300	GTAG
TR53684|c0_g1_i1	NODE_10189_length_1764_cov_4.82446_ID_2734300	GTAG
TR7787|c0_g4_i1	NODE_10189_length_1764_cov_4.82446_ID_2734300	GTAG
TR7787|c0_g4_i1	NODE_10189_length_1764_cov_4.82446_ID_2734300	GTAG
TR8988|c3_g1_i1	NODE_10189_length_1764_cov_4.82446_ID_2734300	GTAG
TR8988|c3_g1_i1	NODE_10189_length_1764_cov_4.82446_ID_2734300	GTAG
TR28303|c0_g1_i1	NODE_10195_length_1762_cov_4.463_ID_582069	CTAC
TR26795|c0_g1_i1	NODE_10195_length_1762_cov_4.463_ID_582069	CTAC
TR28517|c0_g1_i1	NODE_10196_length_1762_cov_10.1878_ID_582095	GTAG
TR94|c0_g1_i1	NODE_102_length_5362_cov_5.04107_ID_329207	CACG
TR94|c0_g1_i1	NODE_102_length_5362_cov_5.04107_ID_329207	CTGC
TR94|c0_g1_i1	NODE_102_length_5362_cov_5.04107_ID_329207	GTAG
TR94|c0_g1_i1	NODE_102_length_5362_cov_5.04107_ID_329207	GTAG
TR94|c0_g1_i1	NODE_102_length_5362_cov_5.04107_ID_329207	GTAG
TR94|c0_g1_i1	NODE_102_length_5362_cov_5.04107_ID_329207	GTAG
TR94|c0_g1_i1	NODE_102_length_5362_cov_5.04107_ID_329207	GTAG
TR94|c0_g1_i1	NODE_102_length_5362_cov_5.04107_ID_329207	GTAG
TR94|c0_g1_i1	NODE_102_length_5362_cov_5.04107_ID_329207	GTAG
TR94|c0_g1_i1	NODE_102_length_5362_cov_5.04107_ID_329207	GTAG
TR94|c0_g1_i1	NODE_102_length_5362_cov_5.04107_ID_329207	GTAG
TR94|c0_g1_i1	NODE_102_length_5362_cov_5.04107_ID_329207	GTAG
TR94|c0_g1_i1	NODE_102_length_5362_cov_5.04107_ID_329207	GTAG
TR94|c0_g1_i1	NODE_102_length_5362_cov_5.04107_ID_329207	GTAG
TR39620|c0_g1_i1	NODE_1020_length_3418_cov_3.16651_ID_731145	CTAC
TR39620|c0_g1_i1	NODE_1020_length_3418_cov_3.16651_ID_731145	CTAC
TR1566|c0_g1_i1	NODE_10202_length_1762_cov_9.03303_ID_582251	GTAG
TR1566|c0_g1_i1	NODE_10202_length_1762_cov_9.03303_ID_582251	GTAG
TR19101|c0_g1_i1	NODE_1021_length_3417_cov_3.93102_ID_346902	GTAG
TR19101|c0_g1_i1	NODE_1021_length_3417_cov_3.93102_ID_346902	GTAG
TR26352|c0_g1_i2	NODE_10215_length_1761_cov_5.35618_ID_582641	ATCG
TR26352|c0_g1_i2	NODE_10215_length_1761_cov_5.35618_ID_582641	GTAG
TR26352|c0_g1_i1	NODE_10215_length_1761_cov_5.35618_ID_582641	GTAG
TR26352|c0_g1_i1	NODE_10215_length_1761_cov_5.35618_ID_582641	TTAA
TR25667|c0_g1_i1	NODE_10216_length_1761_cov_7.14259_ID_582667	CTTC
TR27427|c0_g1_i2	NODE_1022_length_3413_cov_4.96808_ID_346928	CTAC
TR27427|c0_g1_i2	NODE_1022_length_3413_cov_4.96808_ID_346928	CTAC
TR27427|c0_g1_i2	NODE_1022_length_3413_cov_4.96808_ID_346928	CTAC
TR27427|c0_g1_i2	NODE_1022_length_3413_cov_4.96808_ID_346928	CTAC
TR27427|c0_g1_i2	NODE_1022_length_3413_cov_4.96808_ID_346928	CTAC
TR27427|c0_g1_i2	NODE_1022_length_3413_cov_4.96808_ID_346928	CTAC
TR24019|c0_g1_i1	NODE_10230_length_1760_cov_8.85915_ID_583031	GACG
TR24019|c0_g12_i2	NODE_10230_length_1760_cov_8.85915_ID_583031	TTTC
TR24019|c0_g1_i1	NODE_10230_length_1760_cov_8.85915_ID_583031	TTTC
TR24019|c0_g1_i1	NODE_10230_length_1760_cov_8.85915_ID_583031	TTTC
TR24019|c0_g1_i1	NODE_10230_length_1760_cov_8.85915_ID_583031	TTTC
TR24019|c0_g5_i1	NODE_10230_length_1760_cov_8.85915_ID_583031	TTTC
TR41409|c0_g1_i1	NODE_10238_length_1759_cov_1.29228_ID_583213	CTAC
TR41409|c0_g1_i1	NODE_10238_length_1759_cov_1.29228_ID_583213	CTAC
TR6979|c0_g1_i2	NODE_10260_length_1758_cov_6.84181_ID_583785	GCAG
TR6979|c0_g1_i2	NODE_10260_length_1758_cov_6.84181_ID_583785	GTAG
TR6979|c0_g1_i2	NODE_10260_length_1758_cov_6.84181_ID_583785	GTAG
TR36770|c0_g1_i1	NODE_10267_length_1757_cov_2.95708_ID_583915	CTAC
TR48378|c0_g1_i1	NODE_10275_length_1759_cov_2.44847_ID_584123	CTAC
TR29985|c0_g1_i1	NODE_10276_length_1757_cov_2.64847_ID_584149	GTAG
TR40551|c0_g1_i1	NODE_10276_length_1757_cov_2.64847_ID_584149	CTAC
TR24817|c3_g9_i1	NODE_10285_length_1756_cov_4.8681_ID_584357	CTGC
TR48344|c0_g1_i1	NODE_10286_length_1757_cov_2.78344_ID_584383	CTAC
TR48344|c0_g1_i1	NODE_10286_length_1757_cov_2.78344_ID_584383	CTAC
TR6255|c0_g1_i1	NODE_10290_length_1756_cov_7.9546_ID_584513	GTAG
TR11301|c0_g1_i2	NODE_10291_length_1756_cov_4.50031_ID_584539	CTAC
TR768|c5_g7_i1	NODE_1030_length_3410_cov_4.94182_ID_347162	CTAC
TR768|c5_g7_i1	NODE_1030_length_3410_cov_4.94182_ID_347162	CTAC
TR768|c5_g7_i1	NODE_1030_length_3410_cov_4.94182_ID_347162	CTAC
TR768|c5_g7_i1	NODE_1030_length_3410_cov_4.94182_ID_347162	CTAC
TR768|c5_g7_i1	NODE_1030_length_3410_cov_4.94182_ID_347162	CTAC
TR8956|c0_g4_i5	NODE_10305_length_1754_cov_2.14742_ID_584929	CTAC
TR24034|c1_g15_i1	NODE_10309_length_1755_cov_11.1192_ID_2437419	GGAG
TR24034|c1_g15_i1	NODE_10309_length_1755_cov_11.1192_ID_2437419	GGAG
TR24034|c1_g11_i3	NODE_10309_length_1755_cov_11.1192_ID_2437419	GGAG
TR24034|c1_g11_i3	NODE_10309_length_1755_cov_11.1192_ID_2437419	GGAG
TR24034|c1_g6_i1	NODE_10309_length_1755_cov_11.1192_ID_2437419	GGAG
TR24034|c1_g20_i1	NODE_10309_length_1755_cov_11.1192_ID_2437419	GGAG
TR24034|c1_g20_i1	NODE_10309_length_1755_cov_11.1192_ID_2437419	GTAG
TR24034|c1_g20_i1	NODE_10309_length_1755_cov_11.1192_ID_2437419	GTAG
TR24034|c1_g20_i1	NODE_10309_length_1755_cov_11.1192_ID_2437419	GTAG
TR24034|c1_g20_i1	NODE_10309_length_1755_cov_11.1192_ID_2437419	GTAG
TR24034|c1_g20_i1	NODE_10309_length_1755_cov_11.1192_ID_2437419	GTAG
TR24034|c1_g20_i1	NODE_10309_length_1755_cov_11.1192_ID_2437419	GTAG
TR24034|c1_g20_i1	NODE_10309_length_1755_cov_11.1192_ID_2437419	GTAG
TR24034|c1_g20_i1	NODE_10309_length_1755_cov_11.1192_ID_2437419	GTAG
TR27309|c0_g1_i1	NODE_10318_length_1754_cov_5.19852_ID_585325	CTAC
TR48381|c0_g1_i1	NODE_10319_length_1754_cov_1.51936_ID_585351	CTAC
TR48381|c0_g1_i1	NODE_10319_length_1754_cov_1.51936_ID_585351	CTAC
TR192|c0_g10_i1	NODE_10321_length_1754_cov_11.1659_ID_585429	GTAG
TR192|c0_g10_i1	NODE_10321_length_1754_cov_11.1659_ID_585429	GTAG
TR192|c0_g10_i1	NODE_10321_length_1754_cov_11.1659_ID_585429	GTAG
TR8988|c3_g1_i1	NODE_10321_length_1754_cov_11.1659_ID_585429	CTAC
TR8988|c3_g1_i1	NODE_10321_length_1754_cov_11.1659_ID_585429	CTAC
TR8988|c3_g1_i1	NODE_10321_length_1754_cov_11.1659_ID_585429	CTAC
TR8988|c3_g1_i1	NODE_10321_length_1754_cov_11.1659_ID_585429	CTAC
TR8988|c3_g1_i1	NODE_10321_length_1754_cov_11.1659_ID_585429	CTAC
TR27892|c0_g1_i1	NODE_10377_length_1748_cov_2.40049_ID_586991	CTAC
TR4909|c1_g1_i1	NODE_10377_length_1748_cov_2.40049_ID_586991	CTAC
TR43608|c0_g1_i1	NODE_10379_length_1750_cov_5.03019_ID_587043	CTAC
TR1005|c0_g1_i1	NODE_1038_length_3406_cov_2.47332_ID_347318	GTAG
TR1005|c0_g1_i1	NODE_1038_length_3406_cov_2.47332_ID_347318	GTAG
TR1005|c0_g1_i1	NODE_1038_length_3406_cov_2.47332_ID_347318	GTAG
TR1005|c0_g1_i1	NODE_1038_length_3406_cov_2.47332_ID_347318	GTAG
TR1005|c0_g1_i1	NODE_1038_length_3406_cov_2.47332_ID_347318	GTAG
TR1005|c0_g1_i1	NODE_1038_length_3406_cov_2.47332_ID_347318	GTAG
TR1005|c0_g1_i1	NODE_1038_length_3406_cov_2.47332_ID_347318	GTAG
TR1005|c0_g1_i1	NODE_1038_length_3406_cov_2.47332_ID_347318	GTAG
TR8052|c0_g1_i1	NODE_10382_length_1750_cov_2.122_ID_587121	GTAG
TR53328|c0_g1_i1	NODE_10398_length_1749_cov_2.70592_ID_587511	GTAG
TR53328|c0_g1_i1	NODE_10398_length_1749_cov_2.70592_ID_587511	GTAG
TR21055|c1_g1_i1	NODE_10405_length_1749_cov_1.59186_ID_587667	GTAG
TR4175|c1_g3_i1	NODE_10405_length_1749_cov_1.59186_ID_587667	CTAC
TR30736|c4_g14_i5	NODE_10405_length_1749_cov_1.59186_ID_587667	CTTG
TR24048|c0_g8_i1	NODE_10405_length_1749_cov_1.59186_ID_587667	CTAC
TR24048|c0_g8_i1	NODE_10405_length_1749_cov_1.59186_ID_587667	CTAC
TR24048|c0_g8_i1	NODE_10405_length_1749_cov_1.59186_ID_587667	CTAC
TR24048|c0_g8_i1	NODE_10405_length_1749_cov_1.59186_ID_587667	CTAC
TR32877|c0_g1_i1	NODE_104082_length_224_cov_8.06186_ID_2593445	GTAA
TR30775|c3_g2_i3	NODE_10409_length_1749_cov_3.87793_ID_587771	CTAC
TR30775|c3_g2_i3	NODE_10409_length_1749_cov_3.87793_ID_587771	CTAC
TR7792|c0_g1_i6	NODE_10418_length_1748_cov_2.4855_ID_588031	CTAC
TR7792|c0_g1_i6	NODE_10418_length_1748_cov_2.4855_ID_588031	CTAC
TR4909|c1_g1_i1	NODE_1044_length_3402_cov_5.88858_ID_1268743	CTAC
TR4909|c1_g1_i1	NODE_1044_length_3402_cov_5.88858_ID_1268743	CTAC
TR4909|c1_g1_i1	NODE_1044_length_3402_cov_5.88858_ID_1268743	CTAC
TR36922|c0_g1_i1	NODE_10441_length_1747_cov_5.26667_ID_588603	CTGC
TR6691|c0_g3_i2	NODE_1045_length_3403_cov_2.83455_ID_347474	GTAG
TR6691|c0_g3_i2	NODE_1045_length_3403_cov_2.83455_ID_347474	GTAG
TR32753|c0_g1_i1	NODE_10451_length_1746_cov_2.80976_ID_588837	CTAC
TR43493|c0_g1_i1	NODE_10452_length_1746_cov_2.33848_ID_588863	GTAG
TR43493|c0_g1_i1	NODE_10452_length_1746_cov_2.33848_ID_588863	GTAG
TR8985|c0_g4_i1	NODE_10464_length_1741_cov_7.17356_ID_589156	GTAG
TR8985|c0_g4_i1	NODE_10464_length_1741_cov_7.17356_ID_589156	GTAG
TR31253|c0_g2_i5	NODE_10469_length_1745_cov_2.83127_ID_589260	CTAC
TR7161|c0_g1_i1	NODE_10476_length_1745_cov_3.66749_ID_589442	GTAG
TR29248|c0_g1_i3	NODE_10482_length_1743_cov_6.47466_ID_589572	GTAG
TR29248|c0_g1_i3	NODE_10482_length_1743_cov_6.47466_ID_589572	GTAG
TR29248|c0_g1_i3	NODE_10482_length_1743_cov_6.47466_ID_589572	GTAG
TR47907|c0_g4_i2	NODE_10483_length_1745_cov_14.924_ID_589598	GTAG
TR47907|c0_g4_i2	NODE_10483_length_1745_cov_14.924_ID_589598	GTAG
TR12095|c4_g1_i1	NODE_10487_length_1742_cov_1.27211_ID_589702	CTAC
TR15816|c0_g2_i1	NODE_10492_length_1743_cov_8.33148_ID_589832	CTAC
TR15816|c0_g2_i1	NODE_10492_length_1743_cov_8.33148_ID_589832	CTAC
TR26795|c0_g1_i1	NODE_10497_length_1745_cov_4.24923_ID_589988	CTAC
TR26795|c0_g1_i1	NODE_10497_length_1745_cov_4.24923_ID_589988	CTAC
TR50465|c0_g1_i1	NODE_105_length_5340_cov_12.8109_ID_2632112	GGAG
TR48224|c0_g2_i1	NODE_105_length_5340_cov_12.8109_ID_2632112	CTAC
TR32877|c0_g1_i1	NODE_105_length_5340_cov_12.8109_ID_2632112	NNNN
TR24793|c0_g1_i3	NODE_10501_length_1745_cov_2.17192_ID_590092	GTAG
TR2639|c0_g1_i1	NODE_10518_length_1743_cov_4.80693_ID_590508	GTAG
TR1005|c0_g1_i1	NODE_10533_length_1736_cov_2.10402_ID_590976	CTAC
TR48381|c0_g1_i1	NODE_10535_length_1742_cov_1.89226_ID_591028	GTAG
TR30407|c0_g1_i2	NODE_10544_length_1743_cov_4.60471_ID_591262	CTAC
TR40677|c0_g1_i1	NODE_10546_length_1741_cov_3.44176_ID_591314	GTAG
TR40677|c0_g1_i1	NODE_10546_length_1741_cov_3.44176_ID_591314	GTAG
TR40677|c0_g1_i1	NODE_10546_length_1741_cov_3.44176_ID_591314	GTAG
TR40677|c0_g1_i1	NODE_10546_length_1741_cov_3.44176_ID_591314	GTAG
TR27119|c0_g1_i1	NODE_10547_length_1741_cov_5.7943_ID_591340	GTAG
TR27119|c0_g1_i1	NODE_10547_length_1741_cov_5.7943_ID_591340	GTAG
TR48538|c0_g7_i7	NODE_1055_length_3399_cov_4.13081_ID_347630	GTAG
TR48538|c0_g7_i7	NODE_1055_length_3399_cov_4.13081_ID_347630	GTAG
TR45940|c0_g1_i1	NODE_10552_length_1741_cov_4.07249_ID_591496	CTAC
TR45940|c0_g1_i1	NODE_10552_length_1741_cov_4.07249_ID_591496	CTAC
TR28606|c0_g1_i1	NODE_10557_length_1740_cov_1.96838_ID_591626	GCCA
TR28606|c0_g1_i4	NODE_10557_length_1740_cov_1.96838_ID_591626	TCAG
TR7161|c0_g1_i1	NODE_10564_length_1740_cov_3.82083_ID_591782	GTAG
TR21329|c0_g1_i1	NODE_10579_length_1738_cov_5.37097_ID_592250	GCAG
TR25813|c0_g2_i1	NODE_10582_length_1739_cov_8.59677_ID_592354	GCAG
TR50392|c0_g1_i1	NODE_10588_length_1738_cov_2.75171_ID_592590	CTAC
TR28811|c0_g1_i1	NODE_10597_length_1738_cov_6.95903_ID_592824	CTCG
TR26019|c0_g2_i1	NODE_1061_length_3395_cov_5.6242_ID_347812	CTAC
TR10720|c0_g1_i1	NODE_10624_length_1729_cov_9.94344_ID_593582	GTAG
TR4930|c0_g1_i1	NODE_1063_length_3389_cov_7.53523_ID_347838	CTAC
TR4930|c0_g1_i1	NODE_1063_length_3389_cov_7.53523_ID_347838	CTAC
TR4930|c0_g1_i1	NODE_1063_length_3389_cov_7.53523_ID_347838	CTAC
TR4930|c0_g1_i1	NODE_1063_length_3389_cov_7.53523_ID_347838	CTAC
TR1522|c0_g4_i1	NODE_10630_length_1736_cov_7.72281_ID_593712	CAAC
TR1522|c0_g4_i1	NODE_10630_length_1736_cov_7.72281_ID_593712	CAGC
TR31458|c0_g7_i2	NODE_10635_length_1736_cov_5.06339_ID_593816	GTAG
TR49337|c0_g1_i1	NODE_1064_length_3390_cov_3.36899_ID_347864	CTAC
TR49337|c0_g1_i1	NODE_1064_length_3390_cov_3.36899_ID_347864	CTAC
TR49337|c0_g1_i1	NODE_1064_length_3390_cov_3.36899_ID_347864	CTAC
TR49337|c0_g1_i1	NODE_1064_length_3390_cov_3.36899_ID_347864	CTAC
TR49337|c0_g1_i1	NODE_1064_length_3390_cov_3.36899_ID_347864	CTAG
TR30775|c3_g2_i3	NODE_10645_length_1735_cov_5.11007_ID_594076	GTAG
TR30775|c3_g2_i3	NODE_10645_length_1735_cov_5.11007_ID_594076	GTAG
TR50392|c0_g1_i1	NODE_10657_length_1734_cov_2.21469_ID_594414	GTAG
TR40592|c0_g1_i1	NODE_10665_length_1734_cov_3.57996_ID_594700	GTAG
TR24574|c0_g1_i1	NODE_1068_length_3388_cov_4.22968_ID_347968	GTAG
TR4403|c0_g1_i1	NODE_10691_length_1732_cov_1.38941_ID_595324	CTAC
TR4403|c0_g1_i1	NODE_10691_length_1732_cov_1.38941_ID_595324	CTAC
TR7558|c0_g1_i1	NODE_10695_length_1732_cov_2.08474_ID_595428	CTAC
TR11650|c0_g1_i1	NODE_107_length_5302_cov_6.01507_ID_329285	CTAC
TR11650|c0_g1_i1	NODE_107_length_5302_cov_6.01507_ID_329285	CTAC
TR11650|c0_g1_i1	NODE_107_length_5302_cov_6.01507_ID_329285	CTAC
TR11650|c0_g1_i1	NODE_107_length_5302_cov_6.01507_ID_329285	CTAC
TR11650|c0_g1_i1	NODE_107_length_5302_cov_6.01507_ID_329285	CTAC
TR22768|c0_g1_i1	NODE_107_length_5302_cov_6.01507_ID_329285	CTAC
TR31404|c0_g1_i1	NODE_1070_length_3385_cov_4.00921_ID_347994	GTAG
TR31404|c0_g1_i1	NODE_1070_length_3385_cov_4.00921_ID_347994	GTAG
TR31404|c0_g1_i1	NODE_1070_length_3385_cov_4.00921_ID_347994	GTAG
TR31404|c0_g1_i1	NODE_1070_length_3385_cov_4.00921_ID_347994	GTAG
TR48469|c0_g1_i1	NODE_10723_length_1731_cov_9.61783_ID_596250	CCAC
TR48469|c0_g1_i1	NODE_10723_length_1731_cov_9.61783_ID_596250	CCAC
TR45940|c0_g1_i1	NODE_10723_length_1731_cov_9.61783_ID_596250	CTAG
TR2764|c0_g1_i1	NODE_10732_length_1730_cov_3.15533_ID_596510	GTAG
TR2764|c0_g1_i1	NODE_10734_length_1730_cov_3.37056_ID_596562	CTAC
TR25092|c3_g9_i9	NODE_10735_length_1730_cov_6.22271_ID_2413086	GTAC
TR205|c0_g2_i1	NODE_10739_length_1730_cov_4.13911_ID_596800	CTAC
TR205|c0_g2_i1	NODE_10739_length_1730_cov_4.13911_ID_596800	CTAC
TR4015|c0_g2_i1	NODE_10740_length_1730_cov_8.96569_ID_596852	CTAC
TR4015|c0_g2_i1	NODE_10740_length_1730_cov_8.96569_ID_596852	CTAC
TR4015|c0_g2_i1	NODE_10740_length_1730_cov_8.96569_ID_596852	CTGC
TR3802|c0_g1_i1	NODE_10745_length_1731_cov_1.69351_ID_596982	CTGC
TR33501|c0_g2_i1	NODE_10754_length_1729_cov_0.975031_ID_597190	CTAC
TR33501|c0_g2_i1	NODE_10754_length_1729_cov_0.975031_ID_597190	CTAC
TR204|c0_g4_i2	NODE_10760_length_1729_cov_6.38764_ID_597346	GTAG
TR204|c0_g4_i2	NODE_10760_length_1729_cov_6.38764_ID_597346	GTAG
TR204|c0_g4_i2	NODE_10760_length_1729_cov_6.38764_ID_597346	GTAG
TR204|c0_g4_i2	NODE_10760_length_1729_cov_6.38764_ID_597346	GTAG
TR204|c0_g4_i2	NODE_10760_length_1729_cov_6.38764_ID_597346	GTAG
TR204|c0_g4_i2	NODE_10760_length_1729_cov_6.38764_ID_597346	GTAG
TR612|c0_g1_i1	NODE_10763_length_1729_cov_2.46941_ID_597424	CATT
TR612|c0_g1_i1	NODE_10763_length_1729_cov_2.46941_ID_597424	CTAC
TR26489|c0_g2_i1	NODE_10766_length_1726_cov_2.55556_ID_597528	GTAG
TR10110|c0_g1_i2	NODE_1079_length_3380_cov_2.11159_ID_348202	CTAC
TR36971|c0_g1_i1	NODE_1080_length_3380_cov_3.58869_ID_348228	CTAC
TR36971|c0_g1_i1	NODE_1080_length_3380_cov_3.58869_ID_348228	CTAC
TR36971|c0_g1_i1	NODE_1080_length_3380_cov_3.58869_ID_348228	CTAC
TR36971|c0_g1_i1	NODE_1080_length_3380_cov_3.58869_ID_348228	CTAC
TR29248|c0_g1_i3	NODE_10801_length_1726_cov_2.61789_ID_2749444	GTAG
TR15935|c0_g1_i1	NODE_10802_length_1726_cov_5.69168_ID_598594	CAAC
TR15935|c0_g1_i1	NODE_10802_length_1726_cov_5.69168_ID_598594	CTAC
TR23963|c0_g6_i1	NODE_10810_length_1726_cov_3.45654_ID_2468116	GTAG
TR12038|c0_g4_i1	NODE_1082_length_3377_cov_3.23654_ID_953258	CTAC
TR19101|c0_g1_i1	NODE_1082_length_3377_cov_3.23654_ID_953258	CTAC
TR34374|c0_g1_i1	NODE_10823_length_1725_cov_4.81602_ID_599140	GTAG
TR34374|c0_g1_i1	NODE_10823_length_1725_cov_4.81602_ID_599140	GTAG
TR34374|c0_g1_i1	NODE_10823_length_1725_cov_4.81602_ID_599140	GTAG
TR5058|c0_g1_i1	NODE_10824_length_1725_cov_11.2447_ID_2503036	GTAG
TR5058|c0_g1_i1	NODE_10824_length_1725_cov_11.2447_ID_2503036	GTAG
TR590|c0_g2_i6	NODE_1083_length_3377_cov_3.98277_ID_348280	CTAC
TR53684|c0_g1_i1	NODE_10831_length_1725_cov_7.02691_ID_599374	CTAC
TR53684|c0_g1_i1	NODE_10831_length_1725_cov_7.02691_ID_599374	CTAC
TR28559|c0_g2_i2	NODE_10833_length_1725_cov_6.99061_ID_599426	GTAG
TR28559|c0_g2_i2	NODE_10833_length_1725_cov_6.99061_ID_599426	GTAG
TR23699|c0_g1_i2	NODE_10847_length_1721_cov_8.74076_ID_599794	CCAC
TR30407|c0_g1_i2	NODE_10848_length_1724_cov_3.30056_ID_599820	CTAC
TR51326|c0_g1_i2	NODE_10850_length_1724_cov_4.46212_ID_599872	GTAG
TR26795|c0_g1_i1	NODE_1087_length_3359_cov_3.16354_ID_348358	CTAC
TR39585|c0_g1_i1	NODE_10880_length_1721_cov_2.44291_ID_600756	CTAC
TR39585|c0_g1_i1	NODE_10880_length_1721_cov_2.44291_ID_600756	CTAC
TR25071|c1_g3_i1	NODE_10883_length_1721_cov_12.9316_ID_600834	CTAC
TR25071|c1_g3_i1	NODE_10883_length_1721_cov_12.9316_ID_600834	CTAC
TR25071|c1_g3_i1	NODE_10883_length_1721_cov_12.9316_ID_600834	CTAC
TR25071|c1_g3_i1	NODE_10883_length_1721_cov_12.9316_ID_600834	CTAC
TR20678|c0_g1_i1	NODE_10885_length_1721_cov_5.0138_ID_600886	GTAG
TR40329|c0_g1_i1	NODE_1089_length_3371_cov_2.45701_ID_727075	GTAG
TR21234|c0_g1_i1	NODE_1090_length_3371_cov_3.28906_ID_348384	CTAC
TR21234|c0_g1_i1	NODE_1090_length_3371_cov_3.28906_ID_348384	CTAC
TR21234|c0_g1_i1	NODE_1090_length_3371_cov_3.28906_ID_348384	CTAC
TR21234|c0_g1_i1	NODE_1090_length_3371_cov_3.28906_ID_348384	CTAC
TR44011|c0_g1_i1	NODE_10903_length_1719_cov_6.83291_ID_2761230	CTAC
TR44011|c0_g1_i1	NODE_10903_length_1719_cov_6.83291_ID_2761230	CTAC
TR44011|c0_g1_i1	NODE_10903_length_1719_cov_6.83291_ID_2761230	CTAC
TR40520|c0_g1_i2	NODE_10907_length_1718_cov_2.62437_ID_601380	GTAG
TR40520|c0_g1_i2	NODE_10907_length_1718_cov_2.62437_ID_601380	GTAG
TR40520|c0_g1_i2	NODE_10907_length_1718_cov_2.62437_ID_601380	GTAG
TR40520|c0_g1_i2	NODE_10907_length_1718_cov_2.62437_ID_601380	GTAG
TR49623|c0_g1_i1	NODE_1092_length_3370_cov_3.58416_ID_348410	CTAC
TR49623|c0_g1_i1	NODE_1092_length_3370_cov_3.58416_ID_348410	CTAC
TR4506|c0_g1_i1	NODE_10926_length_1718_cov_8.39975_ID_601848	CTAC
TR4506|c0_g1_i1	NODE_10926_length_1718_cov_8.39975_ID_601848	CTAC
TR15179|c1_g1_i11	NODE_10929_length_1718_cov_2.71464_ID_601926	GTAG
TR15179|c1_g1_i11	NODE_10929_length_1718_cov_2.71464_ID_601926	GTAG
TR15179|c1_g1_i11	NODE_10929_length_1718_cov_2.71464_ID_601926	GTAG
TR30787|c3_g4_i4	NODE_10929_length_1718_cov_2.71464_ID_601926	CTAC
TR30787|c3_g4_i4	NODE_10929_length_1718_cov_2.71464_ID_601926	CTAC
TR30787|c3_g4_i4	NODE_10929_length_1718_cov_2.71464_ID_601926	CTAC
TR30787|c3_g4_i4	NODE_10929_length_1718_cov_2.71464_ID_601926	CTAC
TR30787|c3_g4_i4	NODE_10929_length_1718_cov_2.71464_ID_601926	CTAC
TR30787|c3_g4_i4	NODE_10929_length_1718_cov_2.71464_ID_601926	CTAC
TR30787|c3_g4_i4	NODE_10929_length_1718_cov_2.71464_ID_601926	CTAC
TR30787|c3_g4_i4	NODE_10929_length_1718_cov_2.71464_ID_601926	CTAC
TR32180|c3_g6_i2	NODE_10934_length_1718_cov_1.61345_ID_602082	CTAC
TR49623|c0_g1_i1	NODE_10951_length_1717_cov_1.24277_ID_602656	CTAC
TR40551|c0_g1_i1	NODE_10956_length_1716_cov_5.16362_ID_602812	CTAC
TR40551|c0_g1_i1	NODE_10956_length_1716_cov_5.16362_ID_602812	CTAC
TR5701|c0_g1_i1	NODE_10957_length_1716_cov_3.91567_ID_602838	CTAC
TR5701|c0_g1_i1	NODE_10957_length_1716_cov_3.91567_ID_602838	CTAC
TR5701|c0_g1_i1	NODE_10957_length_1716_cov_3.91567_ID_602838	CTAC
TR5701|c0_g1_i1	NODE_10957_length_1716_cov_3.91567_ID_602838	CTGC
TR17575|c0_g1_i1	NODE_10961_length_1716_cov_4.30711_ID_602942	CTAC
TR13893|c0_g1_i1	NODE_10965_length_1715_cov_0.79597_ID_603046	CTAC
TR13893|c0_g1_i1	NODE_10965_length_1715_cov_0.79597_ID_603046	CTAC
TR13893|c0_g1_i1	NODE_10965_length_1715_cov_0.79597_ID_603046	CTAC
TR15561|c0_g1_i1	NODE_10968_length_1714_cov_3.36272_ID_603124	GTAG
TR15561|c0_g1_i1	NODE_10968_length_1714_cov_3.36272_ID_603124	GTAG
TR1645|c0_g1_i1	NODE_10977_length_1714_cov_1.92821_ID_603332	GTAG
TR50429|c0_g2_i1	NODE_10986_length_1714_cov_255.271_ID_2727377	CAAA
TR50429|c0_g2_i1	NODE_10986_length_1714_cov_255.271_ID_2727377	CCAC
TR40551|c0_g1_i1	NODE_1099_length_3367_cov_3.27716_ID_348540	CTAC
TR9573|c0_g3_i1	NODE_11_length_7102_cov_3.57634_ID_327875	CTAC
TR9573|c0_g3_i1	NODE_11_length_7102_cov_3.57634_ID_327875	CTAC
TR9573|c0_g3_i1	NODE_11_length_7102_cov_3.57634_ID_327875	CTAC
TR9573|c0_g3_i1	NODE_11_length_7102_cov_3.57634_ID_327875	CTAC
TR9573|c0_g3_i1	NODE_11_length_7102_cov_3.57634_ID_327875	CTAC
TR9573|c0_g3_i1	NODE_11_length_7102_cov_3.57634_ID_327875	CTAC
TR9573|c0_g3_i1	NODE_11_length_7102_cov_3.57634_ID_327875	CTAC
TR9573|c0_g3_i1	NODE_11_length_7102_cov_3.57634_ID_327875	CTAC
TR9573|c0_g3_i1	NODE_11_length_7102_cov_3.57634_ID_327875	CTAC
TR9573|c0_g3_i1	NODE_11_length_7102_cov_3.57634_ID_327875	CTAC
TR4015|c0_g2_i1	NODE_11_length_7102_cov_3.57634_ID_327875	CTAC
TR4015|c0_g2_i1	NODE_11_length_7102_cov_3.57634_ID_327875	CTAC
TR4015|c0_g2_i1	NODE_11_length_7102_cov_3.57634_ID_327875	CTAC
TR21712|c0_g1_i1	NODE_11_length_7102_cov_3.57634_ID_327875	CTAC
TR21712|c0_g1_i1	NODE_11_length_7102_cov_3.57634_ID_327875	CTAC
TR50762|c0_g1_i3	NODE_110_length_5279_cov_8.11452_ID_329337	GTAG
TR50762|c0_g1_i3	NODE_110_length_5279_cov_8.11452_ID_329337	GTAG
TR50762|c0_g1_i3	NODE_110_length_5279_cov_8.11452_ID_329337	GTAG
TR4909|c1_g1_i1	NODE_110_length_5279_cov_8.11452_ID_329337	GTAG
TR4909|c1_g1_i1	NODE_110_length_5279_cov_8.11452_ID_329337	GTAG
TR1514|c0_g2_i8	NODE_11007_length_1713_cov_2.81084_ID_604008	GCAG
TR17352|c0_g1_i2	NODE_11023_length_1712_cov_3.10347_ID_604424	GTAG
TR17352|c0_g1_i2	NODE_11023_length_1712_cov_3.10347_ID_604424	GTAG
TR8210|c1_g1_i2	NODE_11025_length_1712_cov_6.54574_ID_1610537	GCGG
TR8210|c1_g1_i2	NODE_11025_length_1712_cov_6.54574_ID_1610537	GCGG
TR12078|c4_g10_i1	NODE_11025_length_1712_cov_6.54574_ID_1610537	TTAT
TR26352|c0_g1_i1	NODE_11027_length_1712_cov_7.25994_ID_604502	GTAG
TR26352|c0_g1_i1	NODE_11027_length_1712_cov_7.25994_ID_604502	GTAG
TR14315|c0_g1_i1	NODE_11028_length_1712_cov_3.1205_ID_604528	GTAG
TR11579|c0_g1_i4	NODE_11031_length_1710_cov_3.12871_ID_604606	GTAG
TR11579|c0_g1_i4	NODE_11031_length_1710_cov_3.12871_ID_604606	GTAG
TR19868|c1_g1_i1	NODE_11045_length_1711_cov_4.10354_ID_604944	CTAC
TR1005|c0_g1_i1	NODE_11047_length_1710_cov_3.70202_ID_604996	GTAG
TR1005|c0_g1_i1	NODE_11047_length_1710_cov_3.70202_ID_604996	GTAG
TR35182|c0_g1_i1	NODE_11057_length_1709_cov_4.19962_ID_605282	CCAG
TR35182|c0_g1_i1	NODE_11057_length_1709_cov_4.19962_ID_605282	GTAG
TR35182|c0_g1_i1	NODE_11057_length_1709_cov_4.19962_ID_605282	GTAG
TR48378|c0_g1_i1	NODE_1106_length_3363_cov_9.68263_ID_2735280	CTAC
TR48378|c0_g1_i1	NODE_1106_length_3363_cov_9.68263_ID_2735280	CTAC
TR48378|c0_g1_i1	NODE_1106_length_3363_cov_9.68263_ID_2735280	CTAC
TR48378|c0_g1_i1	NODE_1106_length_3363_cov_9.68263_ID_2735280	CTAC
TR53328|c0_g2_i2	NODE_11063_length_1710_cov_10.1352_ID_605438	CTAC
TR28558|c0_g1_i1	NODE_11069_length_1709_cov_2.84207_ID_605594	CTAC
TR13967|c0_g1_i1	NODE_11077_length_1709_cov_4.47092_ID_605828	GTAG
TR19101|c0_g1_i1	NODE_11077_length_1709_cov_4.47092_ID_605828	GTAG
TR19101|c0_g1_i1	NODE_11077_length_1709_cov_4.47092_ID_605828	CTAC
TR25813|c0_g2_i1	NODE_1108_length_3363_cov_5.28028_ID_348722	CTAC
TR45940|c0_g1_i1	NODE_1108_length_3363_cov_5.28028_ID_348722	CTGC
TR53328|c0_g1_i1	NODE_11092_length_1709_cov_7.95512_ID_606192	CTAC
TR12162|c0_g1_i1	NODE_111_length_5276_cov_4.61515_ID_430245	GTAG
TR12162|c0_g1_i1	NODE_111_length_5276_cov_4.61515_ID_430245	GTAG
TR50762|c0_g1_i3	NODE_11101_length_1709_cov_6.7421_ID_606478	GTAG
TR12095|c4_g1_i1	NODE_11101_length_1709_cov_6.7421_ID_606478	CTAC
TR12095|c4_g1_i1	NODE_11101_length_1709_cov_6.7421_ID_606478	CTAC
TR7997|c0_g1_i1	NODE_11102_length_1709_cov_7.8976_ID_606504	GTAG
TR7997|c0_g1_i1	NODE_11102_length_1709_cov_7.8976_ID_606504	GTAG
TR7997|c0_g1_i1	NODE_11102_length_1709_cov_7.8976_ID_606504	GTAG
TR7997|c0_g1_i1	NODE_11102_length_1709_cov_7.8976_ID_606504	GTAG
TR20678|c0_g1_i1	NODE_11126_length_1707_cov_4.38861_ID_607180	GTAG
TR28157|c1_g4_i1	NODE_11128_length_1707_cov_5.80759_ID_607232	CTAC
TR48538|c0_g7_i7	NODE_11136_length_1707_cov_6.1462_ID_607440	CTAC
TR40389|c0_g1_i1	NODE_11146_length_1706_cov_3.67321_ID_607674	CTAC
TR40389|c0_g1_i1	NODE_11146_length_1706_cov_3.67321_ID_607674	GTAG
TR12619|c0_g5_i1	NODE_11146_length_1706_cov_3.67321_ID_607674	CTAC
TR40677|c0_g1_i1	NODE_11147_length_1706_cov_2.72071_ID_607726	GTAG
TR40677|c0_g1_i1	NODE_11147_length_1706_cov_2.72071_ID_607726	GTAG
TR16238|c0_g1_i1	NODE_11149_length_1710_cov_3.72831_ID_607778	CTAC
TR1243|c0_g1_i1	NODE_1115_length_3360_cov_5.46458_ID_348852	GTAG
TR1243|c0_g1_i1	NODE_1115_length_3360_cov_5.46458_ID_348852	GTAG
TR25813|c0_g2_i1	NODE_11150_length_1706_cov_6.25142_ID_607804	GTAG
TR24749|c0_g2_i2	NODE_11169_length_1706_cov_3.96703_ID_608298	GCAG
TR25649|c0_g1_i8	NODE_1117_length_3356_cov_5.50341_ID_348878	CTAC
TR39620|c0_g1_i1	NODE_11176_length_1704_cov_2.38808_ID_608454	GTAG
TR40551|c0_g1_i1	NODE_11181_length_1705_cov_2.20545_ID_608584	CTAC
TR40551|c0_g1_i1	NODE_11181_length_1705_cov_2.20545_ID_608584	CTAC
TR47334|c0_g2_i12	NODE_11191_length_1703_cov_3.75825_ID_608870	CTAC
TR47334|c0_g2_i12	NODE_11191_length_1703_cov_3.75825_ID_608870	CTAC
TR30775|c3_g2_i3	NODE_11193_length_1703_cov_5.99048_ID_608948	GCAG
TR30775|c3_g2_i3	NODE_11193_length_1703_cov_5.99048_ID_608948	GCAG
TR253|c0_g1_i3	NODE_11196_length_1703_cov_3.23477_ID_609078	GAAG
TR253|c0_g1_i3	NODE_11196_length_1703_cov_3.23477_ID_609078	GCAG
TR253|c0_g1_i3	NODE_11196_length_1703_cov_3.23477_ID_609078	GCAG
TR253|c0_g1_i3	NODE_11196_length_1703_cov_3.23477_ID_609078	GCAG
TR17575|c0_g1_i1	NODE_11207_length_1702_cov_2.18921_ID_609364	CTAC
TR17575|c0_g1_i1	NODE_11207_length_1702_cov_2.18921_ID_609364	CTAC
TR11301|c0_g1_i2	NODE_11209_length_1701_cov_1.97587_ID_609390	GTAG
TR8564|c0_g1_i1	NODE_11218_length_1702_cov_4.96317_ID_609624	GTAG
TR3047|c0_g1_i1	NODE_11221_length_1702_cov_4.63111_ID_609676	CTAC
TR3047|c0_g1_i1	NODE_11221_length_1702_cov_4.63111_ID_609676	CTAC
TR19101|c0_g1_i1	NODE_11225_length_1701_cov_2.6493_ID_609780	GTAG
TR19101|c0_g1_i1	NODE_11225_length_1701_cov_2.6493_ID_609780	GTAG
TR4909|c1_g1_i1	NODE_11241_length_1700_cov_2.36236_ID_610250	GTAG
TR29248|c0_g1_i3	NODE_11248_length_1700_cov_5.07247_ID_610406	GCAG
TR44015|c0_g1_i1	NODE_11248_length_1700_cov_5.07247_ID_610406	GCAG
TR44015|c0_g1_i1	NODE_11248_length_1700_cov_5.07247_ID_610406	GCAG
TR32130|c0_g1_i3	NODE_11248_length_1700_cov_5.07247_ID_610406	GCAG
TR32130|c0_g1_i3	NODE_11248_length_1700_cov_5.07247_ID_610406	GCAG
TR32130|c0_g1_i3	NODE_11248_length_1700_cov_5.07247_ID_610406	GCAG
TR32130|c0_g1_i3	NODE_11248_length_1700_cov_5.07247_ID_610406	GCAG
TR32130|c0_g1_i3	NODE_11248_length_1700_cov_5.07247_ID_610406	GCAG
TR32130|c0_g1_i3	NODE_11248_length_1700_cov_5.07247_ID_610406	GCAG
TR32130|c0_g1_i3	NODE_11248_length_1700_cov_5.07247_ID_610406	GCAG
TR32130|c0_g1_i3	NODE_11248_length_1700_cov_5.07247_ID_610406	GCAG
TR32130|c0_g1_i3	NODE_11248_length_1700_cov_5.07247_ID_610406	GCAG
TR32130|c0_g1_i3	NODE_11248_length_1700_cov_5.07247_ID_610406	GCAG
TR32130|c0_g1_i3	NODE_11248_length_1700_cov_5.07247_ID_610406	GTAG
TR32130|c0_g1_i3	NODE_11248_length_1700_cov_5.07247_ID_610406	GTAG
TR32130|c0_g1_i3	NODE_11248_length_1700_cov_5.07247_ID_610406	GTAG
TR32130|c0_g1_i3	NODE_11248_length_1700_cov_5.07247_ID_610406	GTAG
TR32130|c0_g1_i3	NODE_11248_length_1700_cov_5.07247_ID_610406	GTAG
TR32130|c0_g1_i3	NODE_11248_length_1700_cov_5.07247_ID_610406	GTAG
TR32130|c0_g1_i3	NODE_11248_length_1700_cov_5.07247_ID_610406	GTAG
TR32130|c0_g1_i3	NODE_11248_length_1700_cov_5.07247_ID_610406	GTAG
TR32130|c0_g1_i3	NODE_11248_length_1700_cov_5.07247_ID_610406	GTAG
TR48538|c0_g7_i7	NODE_11248_length_1700_cov_5.07247_ID_610406	CTGC
TR48538|c0_g7_i7	NODE_11248_length_1700_cov_5.07247_ID_610406	CTAC
TR48538|c0_g7_i7	NODE_11248_length_1700_cov_5.07247_ID_610406	CTGC
TR48538|c0_g7_i7	NODE_11248_length_1700_cov_5.07247_ID_610406	CTGC
TR48538|c0_g7_i7	NODE_11248_length_1700_cov_5.07247_ID_610406	CTAC
TR48538|c0_g7_i7	NODE_11248_length_1700_cov_5.07247_ID_610406	CTGC
TR48538|c0_g7_i7	NODE_11248_length_1700_cov_5.07247_ID_610406	CTGC
TR44739|c0_g2_i1	NODE_11252_length_1700_cov_2.93325_ID_610484	GTAG
TR50178|c0_g2_i1	NODE_11256_length_1687_cov_11.8201_ID_610614	GTAG
TR50178|c0_g2_i1	NODE_11256_length_1687_cov_11.8201_ID_610614	GTAG
TR37262|c0_g1_i1	NODE_11271_length_1699_cov_13.0509_ID_1157572	CTCC
TR47382|c0_g1_i1	NODE_11277_length_1697_cov_4.89059_ID_611108	GTAG
TR23963|c0_g6_i1	NODE_1128_length_3352_cov_5.27163_ID_349112	GCAG
TR7997|c0_g1_i1	NODE_11281_length_1698_cov_13.4157_ID_1005324	CTAC
TR48469|c0_g1_i1	NODE_11283_length_1698_cov_2.8014_ID_611238	GTAG
TR27427|c0_g1_i2	NODE_11285_length_1698_cov_2.49332_ID_611290	CTAC
TR24855|c0_g2_i1	NODE_11286_length_1698_cov_3.98727_ID_611316	GTAG
TR24855|c0_g2_i1	NODE_11286_length_1698_cov_3.98727_ID_611316	GTAG
TR24855|c0_g2_i1	NODE_11286_length_1698_cov_3.98727_ID_611316	GTAG
TR47359|c1_g1_i1	NODE_1129_length_3349_cov_2.82997_ID_349138	CTAC
TR47359|c1_g1_i1	NODE_1129_length_3349_cov_2.82997_ID_349138	CTAC
TR47359|c1_g1_i1	NODE_1129_length_3349_cov_2.82997_ID_349138	CTAC
TR47359|c1_g1_i1	NODE_1129_length_3349_cov_2.82997_ID_349138	CTAC
TR30775|c3_g2_i3	NODE_11292_length_1698_cov_3.33864_ID_611472	CTAC
TR2491|c0_g2_i1	NODE_11298_length_1698_cov_2.82432_ID_611602	CTAC
TR32877|c0_g1_i1	NODE_11314_length_1696_cov_6.3707_ID_612018	CTAC
TR519|c0_g1_i1	NODE_11317_length_1697_cov_7.81911_ID_612122	GTAG
TR34432|c0_g1_i1	NODE_1132_length_3346_cov_2.41646_ID_349216	CTAC
TR34432|c0_g1_i1	NODE_1132_length_3346_cov_2.41646_ID_349216	CTAC
TR34432|c0_g1_i1	NODE_1132_length_3346_cov_2.41646_ID_349216	CTAC
TR48013|c0_g1_i1	NODE_11320_length_1696_cov_4.21274_ID_612200	CTAC
TR48013|c0_g1_i1	NODE_11320_length_1696_cov_4.21274_ID_612200	CTAC
TR48013|c0_g1_i1	NODE_11320_length_1696_cov_4.21274_ID_612200	CTAC
TR11301|c0_g1_i2	NODE_11321_length_1697_cov_5.2_ID_612226	CTAC
TR8210|c1_g1_i2	NODE_11323_length_1697_cov_1.93631_ID_612278	GCGG
TR12078|c4_g11_i1	NODE_11323_length_1697_cov_1.93631_ID_612278	CAAC
TR48538|c0_g7_i7	NODE_11326_length_1696_cov_3.92739_ID_612356	CTAC
TR13893|c0_g1_i1	NODE_11327_length_1696_cov_1.72084_ID_612382	CCAC
TR50392|c0_g1_i1	NODE_11329_length_1696_cov_1.37604_ID_612486	GTAG
TR50392|c0_g1_i1	NODE_11329_length_1696_cov_1.37604_ID_612486	GTAG
TR487|c0_g1_i2	NODE_1133_length_3347_cov_2.56522_ID_349242	GTAG
TR29309|c0_g1_i1	NODE_11335_length_1696_cov_0.862333_ID_612677	CTAC
TR29309|c0_g1_i1	NODE_11335_length_1696_cov_0.862333_ID_612677	CTAC
TR24817|c3_g9_i1	NODE_11338_length_1696_cov_9.61249_ID_612755	GTAG
TR24817|c3_g9_i1	NODE_11338_length_1696_cov_9.61249_ID_612755	GTAG
TR31253|c0_g2_i5	NODE_11344_length_1696_cov_2.30083_ID_612937	GTAG
TR31253|c0_g2_i5	NODE_11344_length_1696_cov_2.30083_ID_612937	GTAG
TR28811|c0_g1_i1	NODE_11347_length_1695_cov_3.30102_ID_613015	CTAC
TR28811|c0_g1_i1	NODE_11347_length_1695_cov_3.30102_ID_613015	CTAC
TR30486|c0_g1_i1	NODE_11357_length_1695_cov_4.35268_ID_613275	CTAC
TR1522|c0_g4_i1	NODE_1136_length_3342_cov_8.71247_ID_2416330	GTAG
TR1522|c0_g4_i1	NODE_1136_length_3342_cov_8.71247_ID_2416330	GTAG
TR28527|c0_g1_i1	NODE_11372_length_1694_cov_20.5712_ID_613665	GTAG
TR25031|c2_g1_i1	NODE_11375_length_1694_cov_2.72814_ID_613743	GTAG
TR39786|c0_g1_i1	NODE_11375_length_1694_cov_2.72814_ID_613743	CTAC
TR39786|c0_g1_i1	NODE_11375_length_1694_cov_2.72814_ID_613743	CTAC
TR15816|c0_g1_i1	NODE_1138_length_3340_cov_5.3159_ID_349398	CTGG
TR15816|c0_g2_i1	NODE_1138_length_3340_cov_5.3159_ID_349398	GTCG
TR18856|c0_g2_i1	NODE_1138_length_3340_cov_5.3159_ID_349398	GTCG
TR10559|c0_g1_i2	NODE_11382_length_1693_cov_4.07471_ID_613925	CTAC
TR10559|c0_g1_i2	NODE_11382_length_1693_cov_4.07471_ID_613925	CTGC
TR47300|c0_g1_i1	NODE_11383_length_1693_cov_7.6092_ID_613951	GTAG
TR47300|c0_g1_i1	NODE_11383_length_1693_cov_7.6092_ID_613951	GTAG
TR20678|c0_g1_i1	NODE_11385_length_1695_cov_1.66794_ID_614003	CTAC
TR20678|c0_g1_i1	NODE_11385_length_1695_cov_1.66794_ID_614003	CTAC
TR28968|c0_g2_i1	NODE_11388_length_1693_cov_7.74393_ID_614081	CTAC
TR36770|c0_g1_i1	NODE_11390_length_1693_cov_2.49872_ID_614133	CTAC
TR25347|c0_g1_i1	NODE_11392_length_1693_cov_9.3825_ID_614185	CTAG
TR36922|c0_g1_i1	NODE_11397_length_1693_cov_3.13282_ID_614289	GTAG
TR48344|c0_g1_i1	NODE_11397_length_1693_cov_3.13282_ID_614289	CTAC
TR53684|c0_g1_i1	NODE_11404_length_1692_cov_1.22939_ID_614471	GCAG
TR53684|c0_g1_i1	NODE_11404_length_1692_cov_1.22939_ID_614471	GCAG
TR53684|c0_g1_i1	NODE_11404_length_1692_cov_1.22939_ID_614471	GTAG
TR53684|c0_g1_i1	NODE_11404_length_1692_cov_1.22939_ID_614471	GTAG
TR19604|c0_g1_i1	NODE_11407_length_1692_cov_2.38147_ID_614549	CGAC
TR13967|c0_g1_i1	NODE_1142_length_3334_cov_6.55701_ID_618657	CTAC
TR13967|c0_g1_i1	NODE_1142_length_3334_cov_6.55701_ID_618657	CTAC
TR19905|c0_g1_i2	NODE_1143_length_3337_cov_3.99377_ID_349476	GTAG
TR24620|c0_g1_i1	NODE_11436_length_1690_cov_1.48241_ID_615381	CTAC
TR17605|c0_g1_i1	NODE_11443_length_1690_cov_7.25016_ID_615485	CCAC
TR46644|c0_g1_i1	NODE_11449_length_1689_cov_7.91805_ID_664990	CTAC
TR36191|c0_g1_i1	NODE_11468_length_1688_cov_6.60538_ID_616161	GTAG
TR36191|c0_g1_i1	NODE_11468_length_1688_cov_6.60538_ID_616161	GTAG
TR41409|c0_g1_i1	NODE_11473_length_1688_cov_6.13069_ID_616291	GTAG
TR39585|c0_g1_i1	NODE_11478_length_1687_cov_2.85586_ID_616421	CTAC
TR39585|c0_g1_i1	NODE_11478_length_1687_cov_2.85586_ID_616421	CTAC
TR39585|c0_g1_i1	NODE_11478_length_1687_cov_2.85586_ID_616421	CTAC
TR39585|c0_g1_i1	NODE_11478_length_1687_cov_2.85586_ID_616421	CTAC
TR40677|c0_g1_i1	NODE_11479_length_1688_cov_6.28956_ID_616447	CTAC
TR40677|c0_g1_i1	NODE_11479_length_1688_cov_6.28956_ID_616447	CTAC
TR23963|c0_g6_i1	NODE_1148_length_3335_cov_0.998129_ID_349580	CTAC
TR23963|c0_g6_i1	NODE_1148_length_3335_cov_0.998129_ID_349580	CTAC
TR30407|c0_g1_i2	NODE_1149_length_3332_cov_4.37461_ID_608610	GCAG
TR30407|c0_g1_i2	NODE_1149_length_3332_cov_4.37461_ID_608610	GTAG
TR30407|c0_g1_i2	NODE_1149_length_3332_cov_4.37461_ID_608610	GTAG
TR17284|c0_g2_i1	NODE_1149_length_3332_cov_4.37461_ID_608610	CTCC
TR15182|c0_g4_i1	NODE_1149_length_3332_cov_4.37461_ID_608610	CTCC
TR7482|c0_g2_i1	NODE_11497_length_1685_cov_2.52662_ID_616941	GTAG
TR7482|c0_g2_i1	NODE_11497_length_1685_cov_2.52662_ID_616941	GTAG
TR5701|c0_g1_i1	NODE_115_length_5216_cov_1.72706_ID_443548	CTAC
TR5701|c0_g1_i1	NODE_115_length_5216_cov_1.72706_ID_443548	CTAC
TR5701|c0_g1_i1	NODE_115_length_5216_cov_1.72706_ID_443548	CTAC
TR5701|c0_g1_i1	NODE_115_length_5216_cov_1.72706_ID_443548	CTAC
TR5701|c0_g1_i1	NODE_115_length_5216_cov_1.72706_ID_443548	CTAC
TR5701|c0_g1_i1	NODE_115_length_5216_cov_1.72706_ID_443548	CTAC
TR5701|c0_g1_i1	NODE_115_length_5216_cov_1.72706_ID_443548	CTGC
TR36191|c0_g1_i1	NODE_11509_length_1686_cov_8.95959_ID_617253	GTAG
TR19868|c1_g1_i1	NODE_1151_length_3332_cov_9.83375_ID_349632	GCAG
TR19868|c1_g1_i1	NODE_1151_length_3332_cov_9.83375_ID_349632	GTAG
TR19868|c1_g1_i1	NODE_1151_length_3332_cov_9.83375_ID_349632	GTAG
TR41598|c0_g1_i1	NODE_11521_length_1685_cov_7.71374_ID_617565	CTAC
TR41598|c0_g1_i1	NODE_11521_length_1685_cov_7.71374_ID_617565	CTAC
TR17575|c0_g1_i1	NODE_11541_length_1682_cov_1.33805_ID_618085	GTAG
TR17575|c0_g1_i1	NODE_11541_length_1682_cov_1.33805_ID_618085	GTAG
TR30775|c3_g2_i3	NODE_11550_length_1683_cov_4.51928_ID_618293	CTGC
TR30782|c5_g7_i1	NODE_11550_length_1683_cov_4.51928_ID_618293	CTTG
TR8532|c0_g1_i1	NODE_11568_length_1682_cov_3.74341_ID_618865	GCAG
TR8532|c0_g1_i1	NODE_11568_length_1682_cov_3.74341_ID_618865	GTAG
TR21823|c0_g9_i4	NODE_1158_length_3329_cov_1.99625_ID_349840	GTAG
TR21823|c0_g9_i4	NODE_1158_length_3329_cov_1.99625_ID_349840	GTAG
TR21823|c0_g9_i4	NODE_1158_length_3329_cov_1.99625_ID_349840	GTAG
TR21823|c0_g9_i4	NODE_1158_length_3329_cov_1.99625_ID_349840	GTAG
TR7161|c0_g1_i1	NODE_11586_length_1680_cov_0.886027_ID_619359	GTAG
TR487|c0_g1_i2	NODE_1159_length_3329_cov_2.22399_ID_349866	CTAC
TR12772|c0_g2_i1	NODE_11593_length_1680_cov_3.55119_ID_619541	GTAG
TR16715|c0_g1_i2	NODE_11599_length_1680_cov_2.23052_ID_619671	GTAG
TR11020|c7_g8_i9	NODE_11599_length_1680_cov_2.23052_ID_619671	CTAC
TR11020|c7_g8_i9	NODE_11599_length_1680_cov_2.23052_ID_619671	CTAC
TR24817|c3_g9_i1	NODE_11617_length_1679_cov_20.1115_ID_876902	GTAG
TR24817|c3_g9_i1	NODE_11617_length_1679_cov_20.1115_ID_876902	GTAG
TR24817|c3_g9_i1	NODE_11617_length_1679_cov_20.1115_ID_876902	GTAG
TR24817|c3_g9_i1	NODE_11617_length_1679_cov_20.1115_ID_876902	GTAG
TR23970|c0_g4_i2	NODE_11617_length_1679_cov_20.1115_ID_876902	GTAG
TR23970|c0_g1_i5	NODE_11617_length_1679_cov_20.1115_ID_876902	GTAG
TR23970|c0_g4_i2	NODE_11617_length_1679_cov_20.1115_ID_876902	GTAG
TR5701|c0_g1_i1	NODE_1162_length_3327_cov_2.55625_ID_445030	GTAG
TR5701|c0_g1_i1	NODE_1162_length_3327_cov_2.55625_ID_445030	GTAG
TR5701|c0_g1_i1	NODE_1162_length_3327_cov_2.55625_ID_445030	GTAG
TR5701|c0_g1_i1	NODE_1162_length_3327_cov_2.55625_ID_445030	GTAG
TR21712|c0_g1_i1	NODE_11637_length_1678_cov_6.99678_ID_620607	CTAC
TR21712|c0_g1_i1	NODE_11637_length_1678_cov_6.99678_ID_620607	CTAC
TR41217|c0_g2_i1	NODE_1164_length_3326_cov_5.41544_ID_349970	CTAC
TR41217|c0_g2_i1	NODE_1164_length_3326_cov_5.41544_ID_349970	CTAC
TR40677|c0_g1_i1	NODE_11640_length_1678_cov_2.76531_ID_620685	GTAG
TR40677|c0_g1_i1	NODE_11640_length_1678_cov_2.76531_ID_620685	GTAG
TR9991|c0_g1_i1	NODE_11642_length_1678_cov_0.97421_ID_620711	GCAG
TR9991|c0_g1_i1	NODE_11642_length_1678_cov_0.97421_ID_620711	GTAG
TR14315|c0_g1_i1	NODE_1165_length_3326_cov_3.3598_ID_349996	GTAG
TR14315|c0_g1_i1	NODE_1165_length_3326_cov_3.3598_ID_349996	GTAG
TR14315|c0_g1_i1	NODE_1165_length_3326_cov_3.3598_ID_349996	GTAG
TR14315|c0_g1_i1	NODE_1165_length_3326_cov_3.3598_ID_349996	GTAG
TR14315|c0_g1_i1	NODE_1165_length_3326_cov_3.3598_ID_349996	GTAG
TR14315|c0_g1_i1	NODE_1165_length_3326_cov_3.3598_ID_349996	GTAG
TR14315|c0_g1_i1	NODE_1165_length_3326_cov_3.3598_ID_349996	GTAG
TR14315|c0_g1_i1	NODE_11653_length_1675_cov_4.35677_ID_620997	GTAG
TR28968|c0_g2_i1	NODE_11659_length_1677_cov_3.99032_ID_621179	GTAG
TR29697|c0_g1_i1	NODE_11659_length_1677_cov_3.99032_ID_621179	CTAC
TR1166|c0_g2_i1	NODE_1167_length_3326_cov_3.45435_ID_350048	CTAC
TR50178|c0_g2_i1	NODE_11677_length_1676_cov_2.98192_ID_621595	GTAG
TR50178|c0_g2_i1	NODE_11677_length_1676_cov_2.98192_ID_621595	GTAG
TR790|c2_g2_i1	NODE_11681_length_1676_cov_3.52615_ID_621725	CTAG
TR790|c2_g2_i1	NODE_11681_length_1676_cov_3.52615_ID_621725	CTAG
TR790|c2_g2_i1	NODE_11681_length_1676_cov_3.52615_ID_621725	CTCG
TR790|c2_g2_i1	NODE_11681_length_1676_cov_3.52615_ID_621725	CTCG
TR11066|c0_g8_i2	NODE_11681_length_1676_cov_3.52615_ID_621725	TTCG
TR11066|c0_g8_i3	NODE_11681_length_1676_cov_3.52615_ID_621725	TTGT
TR11066|c0_g8_i4	NODE_11681_length_1676_cov_3.52615_ID_621725	TTTC
TR11066|c0_g3_i1	NODE_11681_length_1676_cov_3.52615_ID_621725	TTTC
TR11066|c0_g7_i1	NODE_11681_length_1676_cov_3.52615_ID_621725	TTTC
TR11066|c0_g7_i1	NODE_11681_length_1676_cov_3.52615_ID_621725	CTAT
TR51326|c0_g1_i2	NODE_11695_length_1675_cov_3.46576_ID_622089	GTAG
TR21712|c0_g1_i1	NODE_117_length_5212_cov_4.82881_ID_329441	GCAG
TR21712|c0_g1_i1	NODE_117_length_5212_cov_4.82881_ID_329441	GTAG
TR27427|c0_g1_i2	NODE_11700_length_1675_cov_3.07817_ID_622219	GCAG
TR12078|c4_g14_i1	NODE_11700_length_1675_cov_3.07817_ID_622219	GTAG
TR2491|c0_g2_i1	NODE_11704_length_1674_cov_2.33872_ID_622323	CTAC
TR35265|c0_g1_i1	NODE_1171_length_3321_cov_6.1286_ID_810899	GTAG
TR35265|c0_g1_i1	NODE_1171_length_3321_cov_6.1286_ID_810899	GTAG
TR28741|c0_g1_i1	NODE_11711_length_1674_cov_7.54816_ID_622479	GTAG
TR28741|c0_g1_i1	NODE_11711_length_1674_cov_7.54816_ID_622479	GTAG
TR26795|c0_g1_i1	NODE_11711_length_1674_cov_7.54816_ID_622479	CTAC
TR43077|c0_g1_i1	NODE_11730_length_1673_cov_19.337_ID_623051	GTAG
TR208|c2_g8_i1	NODE_11740_length_1670_cov_7.04981_ID_623393	CTAC
TR208|c2_g8_i1	NODE_11740_length_1670_cov_7.04981_ID_623393	CTAC
TR208|c2_g8_i1	NODE_11740_length_1670_cov_7.04981_ID_623393	CTAC
TR208|c2_g8_i1	NODE_11740_length_1670_cov_7.04981_ID_623393	CTAC
TR50429|c0_g2_i1	NODE_11743_length_1672_cov_2.61359_ID_623445	GTAG
TR50429|c0_g2_i1	NODE_11743_length_1672_cov_2.61359_ID_623445	GTAG
TR30486|c0_g1_i1	NODE_11746_length_1672_cov_4.20194_ID_623523	CTGC
TR7482|c0_g2_i1	NODE_1175_length_3322_cov_3.11455_ID_350204	GTAG
TR7482|c0_g2_i1	NODE_1175_length_3322_cov_3.11455_ID_350204	GTAG
TR819|c3_g6_i4	NODE_1175_length_3322_cov_3.11455_ID_350204	GTAG
TR819|c3_g6_i4	NODE_1175_length_3322_cov_3.11455_ID_350204	GTAG
TR819|c3_g6_i4	NODE_1175_length_3322_cov_3.11455_ID_350204	GTAG
TR819|c3_g6_i4	NODE_1175_length_3322_cov_3.11455_ID_350204	GTAG
TR819|c3_g6_i4	NODE_1175_length_3322_cov_3.11455_ID_350204	GTAG
TR819|c3_g6_i4	NODE_1175_length_3322_cov_3.11455_ID_350204	GTAG
TR819|c3_g6_i4	NODE_1175_length_3322_cov_3.11455_ID_350204	GTAG
TR819|c3_g6_i4	NODE_1175_length_3322_cov_3.11455_ID_350204	GTAG
TR819|c3_g6_i4	NODE_1175_length_3322_cov_3.11455_ID_350204	GTAG
TR819|c3_g6_i4	NODE_1175_length_3322_cov_3.11455_ID_350204	GTAG
TR819|c3_g6_i4	NODE_1175_length_3322_cov_3.11455_ID_350204	GTAG
TR819|c3_g6_i4	NODE_1175_length_3322_cov_3.11455_ID_350204	GTAG
TR9031|c0_g1_i1	NODE_11751_length_1672_cov_10.4712_ID_1501618	CGAA
TR26795|c0_g1_i1	NODE_11759_length_1671_cov_10.1341_ID_1910208	GTAG
TR48538|c0_g7_i7	NODE_11768_length_1671_cov_6.14767_ID_624017	CTAC
TR48538|c0_g7_i7	NODE_11768_length_1671_cov_6.14767_ID_624017	CTAC
TR48538|c0_g7_i7	NODE_11768_length_1671_cov_6.14767_ID_624017	CTAC
TR2764|c0_g1_i1	NODE_11782_length_1670_cov_3.12897_ID_624459	GCAG
TR34374|c0_g1_i1	NODE_11785_length_1671_cov_3.15554_ID_624537	GTGT
TR42907|c0_g1_i5	NODE_11791_length_1670_cov_11.4174_ID_624719	CTAC
TR42907|c0_g1_i5	NODE_11791_length_1670_cov_11.4174_ID_624719	CTAC
TR42907|c0_g1_i5	NODE_11791_length_1670_cov_11.4174_ID_624719	CTAC
TR11070|c0_g3_i1	NODE_11793_length_1666_cov_3.28664_ID_624797	CTAC
TR27892|c0_g1_i1	NODE_11794_length_1669_cov_3.52464_ID_624823	GTAG
TR24817|c2_g1_i1	NODE_11799_length_1669_cov_1.20687_ID_624953	GTAG
TR8532|c0_g1_i1	NODE_11804_length_1669_cov_6.93969_ID_625057	GTAG
TR4909|c1_g1_i1	NODE_11815_length_1668_cov_2.94354_ID_625343	GTAG
TR12048|c1_g2_i2	NODE_11817_length_1665_cov_1.61259_ID_625395	GTAG
TR12048|c1_g2_i2	NODE_11817_length_1665_cov_1.61259_ID_625395	GTCG
TR6691|c0_g3_i2	NODE_1183_length_3316_cov_4.38045_ID_350386	GTAG
TR26489|c0_g2_i1	NODE_1183_length_3316_cov_4.38045_ID_350386	GTAG
TR26489|c0_g2_i1	NODE_1183_length_3316_cov_4.38045_ID_350386	GTAG
TR23963|c0_g6_i1	NODE_11839_length_1668_cov_1.72403_ID_626099	CTAC
TR49623|c0_g1_i1	NODE_11840_length_1667_cov_3.54545_ID_626125	GTAG
TR45198|c0_g2_i1	NODE_11847_length_1667_cov_8.38182_ID_626307	GAAG
TR22945|c0_g2_i1	NODE_11856_length_1665_cov_5.48343_ID_1127434	GTAG
TR22945|c0_g2_i1	NODE_11856_length_1665_cov_5.48343_ID_1127434	GTGG
TR16300|c0_g1_i1	NODE_1186_length_3314_cov_5.93881_ID_350490	GTAG
TR28157|c1_g4_i1	NODE_11861_length_1666_cov_7.64068_ID_626645	GTAG
TR22768|c0_g1_i1	NODE_11865_length_1666_cov_7.24042_ID_626775	CTAC
TR22768|c0_g1_i1	NODE_11865_length_1666_cov_7.24042_ID_626775	CTAC
TR22768|c0_g1_i1	NODE_11865_length_1666_cov_7.24042_ID_626775	CTAC
TR53684|c0_g1_i1	NODE_11866_length_1666_cov_5.87264_ID_626801	GCAG
TR53684|c0_g1_i1	NODE_11866_length_1666_cov_5.87264_ID_626801	GTAG
TR32095|c0_g1_i2	NODE_11869_length_1666_cov_2.37622_ID_626879	GTAG
TR12162|c0_g1_i1	NODE_11872_length_1666_cov_1.7141_ID_626957	CTAC
TR39585|c0_g1_i1	NODE_11890_length_1665_cov_5.21131_ID_627399	GTAG
TR39585|c0_g1_i1	NODE_11890_length_1665_cov_5.21131_ID_627399	GTAG
TR23182|c0_g1_i1	NODE_11890_length_1665_cov_5.21131_ID_627399	GTAG
TR23182|c0_g1_i1	NODE_11890_length_1665_cov_5.21131_ID_627399	GTAG
TR23182|c0_g1_i1	NODE_11890_length_1665_cov_5.21131_ID_627399	GTAG
TR30407|c0_g1_i2	NODE_11894_length_1665_cov_7.81014_ID_627555	CTAC
TR8532|c0_g1_i1	NODE_11899_length_1663_cov_1.38517_ID_627659	CTAC
TR14189|c0_g1_i2	NODE_1191_length_3310_cov_2.51193_ID_350594	GAAG
TR14189|c0_g1_i2	NODE_1191_length_3310_cov_2.51193_ID_350594	GTAG
TR14189|c0_g1_i2	NODE_1191_length_3310_cov_2.51193_ID_350594	GTAG
TR14189|c0_g1_i2	NODE_1191_length_3310_cov_2.51193_ID_350594	GTAG
TR21712|c0_g1_i1	NODE_11910_length_1664_cov_4.3201_ID_627999	GCAG
TR44011|c0_g1_i1	NODE_11919_length_1662_cov_4.875_ID_628233	GTAG
TR11070|c0_g3_i1	NODE_11928_length_1663_cov_11.3444_ID_628467	GTAG
TR11070|c0_g3_i1	NODE_11928_length_1663_cov_11.3444_ID_628467	GTAG
TR11070|c0_g3_i1	NODE_11928_length_1663_cov_11.3444_ID_628467	GTAG
TR11070|c0_g3_i1	NODE_11928_length_1663_cov_11.3444_ID_628467	GTAG
TR2491|c0_g2_i1	NODE_11932_length_1663_cov_8.22656_ID_628597	CTAC
TR2491|c0_g2_i1	NODE_11932_length_1663_cov_8.22656_ID_628597	CTAC
TR11034|c1_g11_i1	NODE_11939_length_1663_cov_8.58203_ID_628831	CAAC
TR11034|c1_g17_i1	NODE_11939_length_1663_cov_8.58203_ID_628831	CAAC
TR11034|c1_g20_i1	NODE_11939_length_1663_cov_8.58203_ID_628831	CAAC
TR11034|c1_g17_i1	NODE_11939_length_1663_cov_8.58203_ID_628831	CAAC
TR11294|c0_g1_i1	NODE_11939_length_1663_cov_8.58203_ID_628831	CTGC
TR11294|c0_g1_i1	NODE_11939_length_1663_cov_8.58203_ID_628831	GTAC
TR52452|c0_g1_i1	NODE_11951_length_1662_cov_5.69902_ID_629143	CTGC
TR34374|c0_g1_i1	NODE_11956_length_1661_cov_4.44198_ID_629325	CTAC
TR34374|c0_g1_i1	NODE_11956_length_1661_cov_4.44198_ID_629325	CTGC
TR48344|c0_g1_i1	NODE_11970_length_1661_cov_7.97523_ID_629663	GTAG
TR48344|c0_g1_i1	NODE_11970_length_1661_cov_7.97523_ID_629663	GTAG
TR33501|c0_g2_i1	NODE_11971_length_1661_cov_17.3116_ID_629689	CTAC
TR33501|c0_g2_i1	NODE_11971_length_1661_cov_17.3116_ID_629689	CTAC
TR33501|c0_g2_i1	NODE_11971_length_1661_cov_17.3116_ID_629689	CTAC
TR9476|c0_g2_i1	NODE_11972_length_1661_cov_6.90352_ID_629715	GAGG
TR52452|c0_g1_i1	NODE_1198_length_3309_cov_4.70365_ID_350750	CTAC
TR52452|c0_g1_i1	NODE_1198_length_3309_cov_4.70365_ID_350750	CTAC
TR52452|c0_g1_i1	NODE_1198_length_3309_cov_4.70365_ID_350750	CTAC
TR52452|c0_g1_i1	NODE_1198_length_3309_cov_4.70365_ID_350750	CTAC
TR24608|c0_g1_i1	NODE_11987_length_1659_cov_2.45431_ID_630188	CTAC
TR24608|c0_g1_i1	NODE_11987_length_1659_cov_2.45431_ID_630188	CTAC
TR24855|c0_g2_i1	NODE_12_length_6969_cov_6.60947_ID_327901	CTAC
TR24855|c0_g2_i1	NODE_12_length_6969_cov_6.60947_ID_327901	CTAC
TR33390|c0_g1_i1	NODE_12009_length_1658_cov_2.18877_ID_630762	ATCG
TR33390|c0_g1_i1	NODE_12009_length_1658_cov_2.18877_ID_630762	GCAG
TR33390|c0_g1_i3	NODE_12009_length_1658_cov_2.18877_ID_630762	GTGC
TR33390|c0_g2_i1	NODE_12009_length_1658_cov_2.18877_ID_630762	GCGC
TR1514|c0_g2_i8	NODE_12011_length_1658_cov_8.45134_ID_630814	CCAA
TR1514|c0_g2_i8	NODE_12011_length_1658_cov_8.45134_ID_630814	CGAC
TR45302|c2_g1_i1	NODE_1202_length_3307_cov_2.55786_ID_350828	GTAG
TR45302|c2_g1_i1	NODE_1202_length_3307_cov_2.55786_ID_350828	GTAG
TR45302|c2_g1_i1	NODE_1202_length_3307_cov_2.55786_ID_350828	GTAG
TR17352|c0_g1_i2	NODE_12034_length_1657_cov_11.9007_ID_631412	CAAG
TR24817|c3_g9_i1	NODE_12038_length_1656_cov_6.92484_ID_631516	CGAC
TR1522|c0_g4_i1	NODE_12050_length_1655_cov_2.29039_ID_631854	GTAG
TR28157|c1_g4_i1	NODE_12050_length_1655_cov_2.29039_ID_631854	CTAC
TR28157|c1_g4_i1	NODE_12050_length_1655_cov_2.29039_ID_631854	CTAC
TR28157|c1_g4_i1	NODE_12050_length_1655_cov_2.29039_ID_631854	CTAC
TR28157|c1_g4_i1	NODE_12050_length_1655_cov_2.29039_ID_631854	CTAC
TR9031|c0_g1_i1	NODE_12068_length_1653_cov_8.40314_ID_632322	GTAG
TR9031|c0_g1_i1	NODE_12068_length_1653_cov_8.40314_ID_632322	CTAC
TR9031|c0_g1_i1	NODE_12068_length_1653_cov_8.40314_ID_632322	CTAC
TR48013|c0_g1_i1	NODE_12068_length_1653_cov_8.40314_ID_632322	CTAC
TR36103|c0_g1_i1	NODE_12072_length_1655_cov_110.88_ID_2729336	CTAC
TR15028|c0_g1_i1	NODE_1208_length_3303_cov_2.14389_ID_350984	GTAG
TR40551|c0_g1_i1	NODE_1209_length_3301_cov_3.95592_ID_351010	GTAG
TR36971|c0_g1_i1	NODE_12092_length_1652_cov_1.37418_ID_632946	GTAG
TR36971|c0_g1_i1	NODE_12092_length_1652_cov_1.37418_ID_632946	GTAG
TR44011|c0_g1_i1	NODE_1210_length_3303_cov_2.98552_ID_351036	CTAC
TR44011|c0_g1_i1	NODE_1210_length_3303_cov_2.98552_ID_351036	CTAC
TR44011|c0_g1_i1	NODE_1210_length_3303_cov_2.98552_ID_351036	CTAC
TR44011|c0_g1_i1	NODE_1210_length_3303_cov_2.98552_ID_351036	CTAC
TR2877|c0_g1_i1	NODE_12103_length_1653_cov_3.27523_ID_633232	CTAC
TR19971|c0_g1_i1	NODE_12108_length_1652_cov_1.9023_ID_633362	CTAC
TR15028|c0_g1_i1	NODE_1211_length_3299_cov_6.21683_ID_540723	GTAG
TR39819|c0_g1_i1	NODE_1212_length_3299_cov_4.7005_ID_718285	CTAC
TR11034|c1_g17_i1	NODE_12121_length_1652_cov_11.3239_ID_633700	GTAG
TR11034|c1_g17_i1	NODE_12121_length_1652_cov_11.3239_ID_633700	GTAG
TR11034|c1_g17_i1	NODE_12121_length_1652_cov_11.3239_ID_633700	GTAG
TR11034|c1_g17_i1	NODE_12121_length_1652_cov_11.3239_ID_633700	GTAG
TR11034|c1_g17_i1	NODE_12121_length_1652_cov_11.3239_ID_633700	GTAG
TR11034|c1_g17_i1	NODE_12121_length_1652_cov_11.3239_ID_633700	GTAG
TR208|c2_g8_i1	NODE_12121_length_1652_cov_11.3239_ID_633700	CTAC
TR208|c2_g8_i1	NODE_12121_length_1652_cov_11.3239_ID_633700	CTAC
TR208|c2_g8_i1	NODE_12121_length_1652_cov_11.3239_ID_633700	CTAC
TR208|c2_g8_i1	NODE_12121_length_1652_cov_11.3239_ID_633700	CTAC
TR208|c2_g8_i1	NODE_12121_length_1652_cov_11.3239_ID_633700	CTAC
TR208|c2_g8_i1	NODE_12121_length_1652_cov_11.3239_ID_633700	CTAC
TR33383|c0_g1_i2	NODE_12129_length_1651_cov_3.11089_ID_633908	GTAG
TR36922|c0_g1_i1	NODE_12131_length_1651_cov_2.85433_ID_633960	GTGG
TR47116|c0_g1_i1	NODE_12131_length_1651_cov_2.85433_ID_633960	CGAA
TR14189|c0_g1_i2	NODE_12136_length_1648_cov_1.06369_ID_634064	GTAG
TR14189|c0_g1_i2	NODE_12136_length_1648_cov_1.06369_ID_634064	GTAG
TR14189|c0_g1_i2	NODE_12136_length_1648_cov_1.06369_ID_634064	GTAG
TR31454|c0_g2_i1	NODE_1214_length_3295_cov_1.85552_ID_351088	GCAG
TR31454|c0_g2_i1	NODE_1214_length_3295_cov_1.85552_ID_351088	GTAG
TR30407|c0_g1_i2	NODE_12147_length_1651_cov_4.30466_ID_634376	GTAG
TR30407|c0_g1_i2	NODE_12147_length_1651_cov_4.30466_ID_634376	GTAG
TR2764|c0_g1_i1	NODE_12153_length_1650_cov_4.63953_ID_634532	CTAC
TR40149|c0_g1_i1	NODE_1216_length_3296_cov_6.39539_ID_351140	GTAG
TR40149|c0_g1_i1	NODE_1216_length_3296_cov_6.39539_ID_351140	GTAG
TR47907|c0_g4_i2	NODE_12166_length_1649_cov_9.33903_ID_2800381	CTAC
TR47907|c0_g4_i2	NODE_12166_length_1649_cov_9.33903_ID_2800381	CTAC
TR4015|c0_g2_i1	NODE_12168_length_1649_cov_8.95795_ID_634870	GATG
TR28527|c0_g1_i1	NODE_12168_length_1649_cov_8.95795_ID_634870	GTAG
TR555|c0_g1_i1	NODE_12174_length_1648_cov_1.83049_ID_635026	CAAG
TR555|c0_g1_i1	NODE_12174_length_1648_cov_1.83049_ID_635026	CTAC
TR4403|c0_g1_i1	NODE_12176_length_1649_cov_3.14455_ID_635078	CTAC
TR24608|c0_g1_i1	NODE_12195_length_1648_cov_4.03682_ID_635468	GCAG
TR24608|c0_g1_i1	NODE_12195_length_1648_cov_4.03682_ID_635468	GTAG
TR40677|c0_g1_i1	NODE_12196_length_1648_cov_2.33399_ID_635494	GTAG
TR28527|c0_g1_i1	NODE_1220_length_3295_cov_9.83207_ID_558040	GTAG
TR28517|c0_g1_i1	NODE_1220_length_3295_cov_9.83207_ID_558040	CTAC
TR42713|c0_g3_i1	NODE_12204_length_1647_cov_3.65132_ID_635702	CTAC
TR5531|c0_g1_i1	NODE_1221_length_3291_cov_8.28544_ID_351166	GTAG
TR5531|c0_g1_i1	NODE_1221_length_3291_cov_8.28544_ID_351166	GTAG
TR5531|c0_g1_i1	NODE_1221_length_3291_cov_8.28544_ID_351166	GTAG
TR5531|c0_g1_i1	NODE_1221_length_3291_cov_8.28544_ID_351166	GTAG
TR5531|c0_g1_i1	NODE_1221_length_3291_cov_8.28544_ID_351166	GTAG
TR30481|c0_g1_i1	NODE_12224_length_1647_cov_9.03618_ID_636196	CTAC
TR21712|c0_g1_i1	NODE_1223_length_3293_cov_4.33575_ID_351218	GTAG
TR21712|c0_g1_i1	NODE_1223_length_3293_cov_4.33575_ID_351218	GTAG
TR21712|c0_g1_i1	NODE_1223_length_3293_cov_4.33575_ID_351218	GTAG
TR7773|c0_g7_i2	NODE_12230_length_1646_cov_7.50165_ID_2252120	GTAA
TR25696|c0_g1_i1	NODE_12233_length_1646_cov_2.17314_ID_636404	CTAC
TR25696|c0_g1_i1	NODE_12233_length_1646_cov_2.17314_ID_636404	CTAC
TR25696|c0_g1_i1	NODE_12233_length_1646_cov_2.17314_ID_636404	CTGC
TR6894|c0_g1_i1	NODE_12253_length_1644_cov_1.84124_ID_636924	CCAC
TR6894|c0_g1_i1	NODE_12253_length_1644_cov_1.84124_ID_636924	CTAC
TR6894|c0_g1_i1	NODE_12253_length_1644_cov_1.84124_ID_636924	CTAC
TR6894|c0_g1_i1	NODE_12253_length_1644_cov_1.84124_ID_636924	CTAC
TR4506|c0_g1_i1	NODE_12256_length_1645_cov_7.52503_ID_637002	CTAC
TR32180|c3_g10_i2	NODE_12258_length_1645_cov_4.20224_ID_637054	CTAC
TR47300|c0_g1_i1	NODE_1227_length_3281_cov_5.95103_ID_351322	GTAG
TR2639|c0_g1_i1	NODE_12272_length_1644_cov_3.6915_ID_637392	GTAG
TR2639|c0_g1_i1	NODE_12272_length_1644_cov_3.6915_ID_637392	GTAG
TR50677|c0_g1_i1	NODE_12279_length_1642_cov_1.57388_ID_637600	ACTG
TR50677|c0_g1_i1	NODE_12279_length_1642_cov_1.57388_ID_637600	GTAG
TR19828|c0_g1_i1	NODE_1228_length_3288_cov_1.42094_ID_351348	GTAG
TR28154|c1_g2_i5	NODE_1228_length_3288_cov_1.42094_ID_351348	CTAC
TR28154|c1_g2_i5	NODE_1228_length_3288_cov_1.42094_ID_351348	CTAC
TR21712|c0_g1_i1	NODE_12285_length_1643_cov_4.66227_ID_637730	GTAG
TR21712|c0_g1_i1	NODE_12285_length_1643_cov_4.66227_ID_637730	GTAG
TR48538|c0_g7_i7	NODE_12288_length_1643_cov_6.57454_ID_637808	CTAC
TR41444|c0_g1_i1	NODE_1229_length_3288_cov_2.37646_ID_351374	CTAC
TR41444|c0_g1_i1	NODE_1229_length_3288_cov_2.37646_ID_351374	CTAC
TR41444|c0_g1_i1	NODE_1229_length_3288_cov_2.37646_ID_351374	CTAC
TR41444|c0_g1_i1	NODE_1229_length_3288_cov_2.37646_ID_351374	CTAC
TR39302|c0_g1_i1	NODE_12297_length_1643_cov_6.22625_ID_638068	CTAC
TR35265|c0_g1_i1	NODE_12309_length_1642_cov_2.31089_ID_638380	CTAC
TR5701|c0_g1_i1	NODE_12310_length_1642_cov_10.9122_ID_638406	GTAG
TR5701|c0_g1_i1	NODE_12310_length_1642_cov_10.9122_ID_638406	GTAG
TR5701|c0_g1_i1	NODE_12310_length_1642_cov_10.9122_ID_638406	GTAG
TR7451|c0_g8_i4	NODE_12313_length_1642_cov_5.5538_ID_638484	CTAA
TR30787|c3_g4_i4	NODE_12317_length_1642_cov_2.15182_ID_638562	GTAG
TR30787|c3_g4_i4	NODE_12317_length_1642_cov_2.15182_ID_638562	GTAG
TR30787|c3_g4_i4	NODE_12317_length_1642_cov_2.15182_ID_638562	GTAG
TR30787|c3_g4_i4	NODE_12317_length_1642_cov_2.15182_ID_638562	GTAG
TR28154|c1_g2_i5	NODE_12337_length_1640_cov_2.51387_ID_639030	GTAG
TR7142|c0_g2_i1	NODE_12338_length_1655_cov_3.05812_ID_639056	GTAG
TR7142|c0_g2_i1	NODE_12338_length_1655_cov_3.05812_ID_639056	GTAG
TR6201|c0_g2_i1	NODE_1234_length_3284_cov_2.35676_ID_868418	CTAC
TR6201|c0_g2_i1	NODE_1234_length_3284_cov_2.35676_ID_868418	CTGC
TR6201|c0_g2_i1	NODE_1234_length_3284_cov_2.35676_ID_868418	CTGC
TR34432|c0_g1_i1	NODE_12344_length_1640_cov_6.92999_ID_639212	GTAG
TR34432|c0_g1_i1	NODE_12344_length_1640_cov_6.92999_ID_639212	GTAG
TR11915|c0_g1_i1	NODE_12345_length_1641_cov_5.82761_ID_639238	GTAG
TR23963|c0_g6_i1	NODE_12349_length_1641_cov_2.0469_ID_639452	GTAG
TR23963|c0_g6_i1	NODE_12349_length_1641_cov_2.0469_ID_639452	GTAG
TR23963|c0_g6_i1	NODE_12349_length_1641_cov_2.0469_ID_639452	GTAG
TR40551|c0_g1_i1	NODE_12352_length_1641_cov_8.38045_ID_639530	GTAG
TR34904|c0_g2_i1	NODE_12353_length_1641_cov_4.0469_ID_639556	CTAC
TR30407|c0_g1_i2	NODE_12354_length_1641_cov_3.61361_ID_639582	CTAC
TR4015|c0_g2_i1	NODE_12360_length_1640_cov_2.73959_ID_639738	CTAC
TR579|c0_g1_i1	NODE_12368_length_1645_cov_3.28222_ID_639998	ACAC
TR39687|c0_g1_i1	NODE_1238_length_3283_cov_4.68629_ID_351504	CTAC
TR39687|c0_g1_i1	NODE_1238_length_3283_cov_4.68629_ID_351504	CTGC
TR39687|c0_g1_i1	NODE_1238_length_3283_cov_4.68629_ID_351504	CTGC
TR26961|c1_g1_i2	NODE_12388_length_1639_cov_3.01587_ID_640570	CTAC
TR34716|c0_g1_i2	NODE_12398_length_1638_cov_0.997353_ID_640778	CTAC
TR34716|c0_g1_i2	NODE_12398_length_1638_cov_0.997353_ID_640778	CTAC
TR34716|c0_g1_i2	NODE_12398_length_1638_cov_0.997353_ID_640778	CTAC
TR24855|c0_g2_i1	NODE_124_length_5154_cov_5.39606_ID_329597	GTAG
TR24855|c0_g2_i1	NODE_124_length_5154_cov_5.39606_ID_329597	GTAG
TR40389|c0_g1_i1	NODE_12405_length_1638_cov_7.18928_ID_640960	GTAG
TR1522|c0_g4_i1	NODE_12405_length_1638_cov_7.18928_ID_640960	CTAC
TR15179|c1_g1_i11	NODE_12405_length_1638_cov_7.18928_ID_640960	CTAC
TR22768|c0_g1_i1	NODE_1241_length_3285_cov_4.26061_ID_1389642	CTAC
TR22768|c0_g1_i1	NODE_1241_length_3285_cov_4.26061_ID_1389642	CTAC
TR34374|c0_g1_i1	NODE_12417_length_1637_cov_7.77417_ID_641298	GTAG
TR9937|c0_g2_i1	NODE_1242_length_3283_cov_6.02503_ID_351556	CTAC
TR9937|c0_g2_i1	NODE_1242_length_3283_cov_6.02503_ID_351556	CTAC
TR9937|c0_g2_i1	NODE_1242_length_3283_cov_6.02503_ID_351556	CTAC
TR37262|c0_g1_i1	NODE_12439_length_1636_cov_6.50298_ID_641974	GTAG
TR24749|c0_g2_i2	NODE_12451_length_1636_cov_3.13121_ID_642312	CTAC
TR24749|c0_g2_i2	NODE_12451_length_1636_cov_3.13121_ID_642312	CTAC
TR24749|c0_g2_i2	NODE_12451_length_1636_cov_3.13121_ID_642312	CTAC
TR24749|c0_g2_i2	NODE_12451_length_1636_cov_3.13121_ID_642312	CTAC
TR24749|c0_g2_i2	NODE_12451_length_1636_cov_3.13121_ID_642312	CTAC
TR24749|c0_g2_i2	NODE_12451_length_1636_cov_3.13121_ID_642312	CTAC
TR39585|c0_g1_i1	NODE_12455_length_1635_cov_3.26525_ID_642416	CTAC
TR39585|c0_g1_i1	NODE_12455_length_1635_cov_3.26525_ID_642416	CTAC
TR45739|c0_g1_i1	NODE_12461_length_1634_cov_3.84218_ID_642572	GCAG
TR23174|c0_g2_i1	NODE_12463_length_1635_cov_3.84814_ID_642624	GTAG
TR23174|c0_g2_i1	NODE_12463_length_1635_cov_3.84814_ID_642624	GTAG
TR27355|c0_g1_i1	NODE_12463_length_1635_cov_3.84814_ID_642624	GTAG
TR4930|c0_g1_i1	NODE_1249_length_3280_cov_11.6977_ID_2488182	CTAC
TR4930|c0_g1_i1	NODE_1249_length_3280_cov_11.6977_ID_2488182	CTAC
TR4930|c0_g1_i1	NODE_1249_length_3280_cov_11.6977_ID_2488182	CTAC
TR36174|c0_g1_i1	NODE_12490_length_1634_cov_6.03318_ID_643352	GTAG
TR30481|c0_g1_i1	NODE_125_length_5151_cov_3.55094_ID_359323	CTAC
TR7997|c0_g1_i1	NODE_125_length_5151_cov_3.55094_ID_359323	CTAC
TR7997|c0_g1_i1	NODE_125_length_5151_cov_3.55094_ID_359323	CTAC
TR7997|c0_g1_i1	NODE_125_length_5151_cov_3.55094_ID_359323	CTAC
TR7997|c0_g1_i1	NODE_125_length_5151_cov_3.55094_ID_359323	CTAC
TR7997|c0_g1_i1	NODE_125_length_5151_cov_3.55094_ID_359323	CTAC
TR7997|c0_g1_i1	NODE_125_length_5151_cov_3.55094_ID_359323	CTGC
TR30481|c0_g1_i1	NODE_12500_length_1633_cov_5.57503_ID_643638	GCAG
TR28527|c0_g1_i1	NODE_12509_length_1632_cov_3.71448_ID_643846	CTAC
TR20905|c0_g1_i2	NODE_1252_length_3278_cov_2.93369_ID_351712	GTAG
TR20905|c0_g1_i2	NODE_1252_length_3278_cov_2.93369_ID_351712	GTAG
TR20905|c0_g1_i2	NODE_1252_length_3278_cov_2.93369_ID_351712	GTAG
TR4403|c0_g1_i1	NODE_12527_length_1632_cov_4.3608_ID_644418	GTAG
TR49337|c0_g1_i1	NODE_12527_length_1632_cov_4.3608_ID_644418	GTAG
TR2976|c0_g9_i7	NODE_1254_length_3279_cov_6.70178_ID_351738	GCAG
TR2976|c0_g9_i7	NODE_1254_length_3279_cov_6.70178_ID_351738	GTAG
TR44011|c0_g1_i1	NODE_12541_length_1630_cov_1.05718_ID_644730	GTAG
TR44011|c0_g1_i1	NODE_12541_length_1630_cov_1.05718_ID_644730	GTAG
TR44011|c0_g1_i1	NODE_12541_length_1630_cov_1.05718_ID_644730	GTAG
TR44011|c0_g1_i1	NODE_12541_length_1630_cov_1.05718_ID_644730	GTAG
TR19868|c1_g1_i1	NODE_12557_length_1630_cov_2.86294_ID_645146	CTGC
TR28157|c1_g4_i1	NODE_1256_length_3278_cov_6.27079_ID_351844	GTAG
TR25649|c0_g1_i8	NODE_1257_length_3276_cov_3.47524_ID_351870	GTAG
TR33862|c0_g1_i1	NODE_12575_length_1630_cov_4.25615_ID_645614	CTAC
TR33862|c0_g1_i1	NODE_12575_length_1630_cov_4.25615_ID_645614	CTAC
TR14189|c0_g1_i2	NODE_12576_length_1629_cov_2.61718_ID_645640	GTAG
TR40677|c0_g1_i1	NODE_12578_length_1629_cov_2.36152_ID_645692	CTAC
TR40677|c0_g1_i1	NODE_12578_length_1629_cov_2.36152_ID_645692	CTAC
TR28157|c1_g4_i1	NODE_12580_length_1629_cov_6.36884_ID_645744	GTAG
TR28157|c1_g4_i1	NODE_12580_length_1629_cov_6.36884_ID_645744	GTAG
TR28157|c1_g4_i1	NODE_12580_length_1629_cov_6.36884_ID_645744	GTAG
TR28157|c1_g4_i1	NODE_12580_length_1629_cov_6.36884_ID_645744	GTAG
TR28157|c1_g4_i1	NODE_12580_length_1629_cov_6.36884_ID_645744	GTAG
TR8988|c3_g1_i1	NODE_12582_length_1629_cov_12.5872_ID_704857	CTAC
TR8988|c3_g1_i1	NODE_12582_length_1629_cov_12.5872_ID_704857	CTAC
TR8988|c3_g1_i1	NODE_12582_length_1629_cov_12.5872_ID_704857	CTAC
TR4797|c0_g1_i1	NODE_12583_length_1628_cov_2.33489_ID_645822	CGGG
TR48344|c0_g1_i1	NODE_12584_length_1629_cov_7.49933_ID_1561630	GTAG
TR29471|c0_g1_i1	NODE_12591_length_1629_cov_6.89747_ID_646090	GTAG
TR54212|c1_g1_i1	NODE_126_length_5148_cov_5.10633_ID_1004022	CTAC
TR54212|c1_g1_i1	NODE_126_length_5148_cov_5.10633_ID_1004022	CTAC
TR54212|c1_g1_i1	NODE_126_length_5148_cov_5.10633_ID_1004022	CTAC
TR54212|c1_g1_i1	NODE_126_length_5148_cov_5.10633_ID_1004022	CTAC
TR27892|c0_g1_i1	NODE_12603_length_1628_cov_4.25916_ID_646480	CTTG
TR6501|c0_g1_i1	NODE_12607_length_1628_cov_3.4044_ID_646584	GAAG
TR1166|c0_g2_i1	NODE_12608_length_1628_cov_3.81879_ID_646610	GTAG
TR9066|c0_g1_i1	NODE_1261_length_3275_cov_5.28431_ID_351974	CTAC
TR9066|c0_g1_i1	NODE_1261_length_3275_cov_5.28431_ID_351974	CTAC
TR9066|c0_g1_i1	NODE_1261_length_3275_cov_5.28431_ID_351974	CTAC
TR9066|c0_g1_i1	NODE_1261_length_3275_cov_5.28431_ID_351974	CTAC
TR45940|c0_g1_i1	NODE_12611_length_1627_cov_0.485333_ID_646688	GTAG
TR45940|c0_g1_i1	NODE_12611_length_1627_cov_0.485333_ID_646688	GTAG
TR45940|c0_g1_i1	NODE_12611_length_1627_cov_0.485333_ID_646688	GTAG
TR42154|c0_g1_i1	NODE_1263_length_3272_cov_4.94628_ID_352000	CTAC
TR42154|c0_g1_i1	NODE_1263_length_3272_cov_4.94628_ID_352000	CTAC
TR6691|c0_g3_i2	NODE_1264_length_3272_cov_5.39968_ID_352026	GTAG
TR6691|c0_g3_i2	NODE_1264_length_3272_cov_5.39968_ID_352026	GTAG
TR6691|c0_g3_i2	NODE_1264_length_3272_cov_5.39968_ID_352026	GTAG
TR6691|c0_g3_i2	NODE_1264_length_3272_cov_5.39968_ID_352026	GTAG
TR8988|c3_g1_i1	NODE_12647_length_1626_cov_4.82989_ID_647652	CTGC
TR7997|c0_g1_i1	NODE_1265_length_3272_cov_2.62957_ID_352052	CTAC
TR45681|c0_g1_i1	NODE_1265_length_3272_cov_2.62957_ID_352052	CTAC
TR45681|c0_g1_i1	NODE_1265_length_3272_cov_2.62957_ID_352052	CTAC
TR19868|c1_g1_i1	NODE_12661_length_1624_cov_1.1316_ID_648070	GTAG
TR48134|c0_g4_i1	NODE_12662_length_1624_cov_1.0668_ID_648096	CAAA
TR48134|c0_g4_i1	NODE_12662_length_1624_cov_1.0668_ID_648096	CAAC
TR48134|c0_g4_i1	NODE_12662_length_1624_cov_1.0668_ID_648096	CTAC
TR48134|c0_g4_i1	NODE_12662_length_1624_cov_1.0668_ID_648096	CTAC
TR48134|c0_g4_i1	NODE_12662_length_1624_cov_1.0668_ID_648096	CTAC
TR48134|c0_g4_i1	NODE_12662_length_1624_cov_1.0668_ID_648096	CTAC
TR48134|c0_g4_i1	NODE_12662_length_1624_cov_1.0668_ID_648096	CTAC
TR48134|c0_g4_i1	NODE_12662_length_1624_cov_1.0668_ID_648096	CTAC
TR48134|c0_g4_i1	NODE_12662_length_1624_cov_1.0668_ID_648096	TGAA
TR48134|c0_g4_i1	NODE_12662_length_1624_cov_1.0668_ID_648096	TGAC
TR48134|c0_g4_i1	NODE_12662_length_1624_cov_1.0668_ID_648096	TGAC
TR48134|c0_g4_i1	NODE_12662_length_1624_cov_1.0668_ID_648096	TTAC
TR33340|c2_g1_i3	NODE_12679_length_1623_cov_3.96925_ID_2466706	GTAG
TR17605|c0_g1_i1	NODE_12681_length_1623_cov_3.0361_ID_648616	CTAC
TR6474|c0_g1_i1	NODE_12686_length_1623_cov_3.15642_ID_648772	CTAC
TR2639|c0_g1_i1	NODE_12695_length_1622_cov_2.50234_ID_649006	CGAC
TR2639|c0_g1_i1	NODE_12695_length_1622_cov_2.50234_ID_649006	CTAC
TR26008|c0_g1_i1	NODE_1270_length_3268_cov_3.62974_ID_352182	GTAG
TR26008|c0_g1_i1	NODE_1270_length_3268_cov_3.62974_ID_352182	GTAG
TR26489|c0_g2_i1	NODE_12700_length_1622_cov_2.99465_ID_649162	GTAG
TR26489|c0_g2_i1	NODE_12700_length_1622_cov_2.99465_ID_649162	GTAG
TR755|c0_g1_i2	NODE_12708_length_1622_cov_28.7605_ID_1198406	CTAG
TR47359|c1_g1_i1	NODE_12708_length_1622_cov_28.7605_ID_1198406	CTTG
TR28527|c0_g1_i1	NODE_1271_length_3267_cov_3.88121_ID_352234	CTAC
TR36922|c0_g1_i1	NODE_12711_length_1622_cov_3.75385_ID_649474	GTAG
TR36922|c0_g1_i1	NODE_12711_length_1622_cov_3.75385_ID_649474	GTAG
TR25060|c0_g1_i2	NODE_12725_length_1621_cov_5.39424_ID_649890	AGAG
TR25060|c0_g1_i2	NODE_12725_length_1621_cov_5.39424_ID_649890	GAAC
TR25060|c0_g1_i2	NODE_12725_length_1621_cov_5.39424_ID_649890	GAAC
TR40551|c0_g1_i1	NODE_12730_length_1621_cov_9.67269_ID_650020	GTAG
TR29697|c0_g1_i1	NODE_12730_length_1621_cov_9.67269_ID_650020	CTAC
TR28527|c0_g1_i1	NODE_12744_length_1620_cov_6.50703_ID_650384	CTAC
TR30407|c0_g1_i2	NODE_12753_length_1620_cov_4.4347_ID_650618	CTAC
TR11409|c0_g1_i2	NODE_1276_length_3262_cov_3.43112_ID_352390	CTAC
TR17605|c0_g1_i1	NODE_1276_length_3262_cov_3.43112_ID_352390	CTAC
TR17605|c0_g1_i1	NODE_1276_length_3262_cov_3.43112_ID_352390	CTAC
TR32095|c0_g1_i2	NODE_12764_length_1618_cov_3.78083_ID_650930	CTAC
TR8988|c3_g1_i1	NODE_12765_length_1619_cov_3.61528_ID_650956	GTAG
TR19971|c0_g1_i1	NODE_1277_length_3263_cov_6.72003_ID_352416	CTAC
TR19971|c0_g1_i1	NODE_1277_length_3263_cov_6.72003_ID_352416	CTAC
TR19971|c0_g1_i1	NODE_1277_length_3263_cov_6.72003_ID_352416	CTAC
TR24817|c3_g9_i1	NODE_12775_length_1619_cov_8.77815_ID_651216	GCAG
TR24817|c3_g9_i1	NODE_12775_length_1619_cov_8.77815_ID_651216	GCAG
TR24817|c3_g9_i1	NODE_12775_length_1619_cov_8.77815_ID_651216	GCAG
TR24817|c3_g9_i1	NODE_12775_length_1619_cov_8.77815_ID_651216	GCAG
TR24817|c3_g9_i1	NODE_12775_length_1619_cov_8.77815_ID_651216	GCAG
TR24817|c3_g9_i1	NODE_12775_length_1619_cov_8.77815_ID_651216	GCAG
TR24817|c3_g9_i1	NODE_12775_length_1619_cov_8.77815_ID_651216	GTAG
TR24817|c3_g9_i1	NODE_12775_length_1619_cov_8.77815_ID_651216	GTAG
TR24817|c3_g9_i1	NODE_12775_length_1619_cov_8.77815_ID_651216	GTAG
TR24817|c3_g9_i1	NODE_12775_length_1619_cov_8.77815_ID_651216	GTAG
TR24817|c3_g9_i1	NODE_12775_length_1619_cov_8.77815_ID_651216	GTAG
TR23970|c0_g4_i2	NODE_12775_length_1619_cov_8.77815_ID_651216	GTAG
TR23970|c0_g1_i5	NODE_12775_length_1619_cov_8.77815_ID_651216	GTAG
TR23970|c0_g1_i5	NODE_12775_length_1619_cov_8.77815_ID_651216	GTAG
TR13967|c0_g1_i1	NODE_12777_length_1618_cov_1.55734_ID_651268	GTAG
TR38678|c0_g9_i1	NODE_12803_length_1616_cov_3.31745_ID_651970	GAAG
TR38678|c0_g3_i1	NODE_12803_length_1616_cov_3.31745_ID_651970	GTTG
TR38678|c0_g3_i1	NODE_12803_length_1616_cov_3.31745_ID_651970	GTTG
TR38678|c0_g10_i1	NODE_12803_length_1616_cov_3.31745_ID_651970	ATAG
TR38678|c0_g5_i1	NODE_12803_length_1616_cov_3.31745_ID_651970	CGGT
TR38678|c0_g2_i1	NODE_12803_length_1616_cov_3.31745_ID_651970	CGAG
TR38678|c0_g6_i1	NODE_12803_length_1616_cov_3.31745_ID_651970	GGGC
TR38678|c0_g9_i1	NODE_12803_length_1616_cov_3.31745_ID_651970	GGGC
TR38678|c0_g14_i1	NODE_12803_length_1616_cov_3.31745_ID_651970	GTGC
TR38678|c0_g11_i2	NODE_12803_length_1616_cov_3.31745_ID_651970	GTGC
TR38678|c0_g11_i1	NODE_12803_length_1616_cov_3.31745_ID_651970	TGGC
TR38678|c0_g5_i1	NODE_12803_length_1616_cov_3.31745_ID_651970	TGGC
TR38678|c0_g6_i1	NODE_12803_length_1616_cov_3.31745_ID_651970	TTAT
TR32180|c3_g6_i2	NODE_1281_length_3261_cov_4.83184_ID_641922	CTAC
TR32180|c3_g6_i2	NODE_1281_length_3261_cov_4.83184_ID_641922	GTAG
TR32180|c3_g6_i2	NODE_1281_length_3261_cov_4.83184_ID_641922	CTAC
TR519|c0_g1_i1	NODE_1282_length_3258_cov_3.34376_ID_352589	GTAG
TR519|c0_g1_i1	NODE_1282_length_3258_cov_3.34376_ID_352589	GTAG
TR32180|c3_g6_i2	NODE_1283_length_3258_cov_7.90645_ID_2828156	GTAG
TR32180|c3_g6_i2	NODE_1283_length_3258_cov_7.90645_ID_2828156	GTAG
TR32180|c3_g6_i2	NODE_1283_length_3258_cov_7.90645_ID_2828156	GTAG
TR32180|c3_g6_i2	NODE_1283_length_3258_cov_7.90645_ID_2828156	GTAG
TR28394|c1_g1_i1	NODE_12831_length_1616_cov_3.56414_ID_652594	CTAC
TR3802|c0_g1_i1	NODE_12831_length_1616_cov_3.56414_ID_652594	CTAC
TR53612|c0_g1_i2	NODE_12835_length_1616_cov_4.67495_ID_652698	CCAC
TR21836|c0_g1_i3	NODE_12837_length_1620_cov_11.2095_ID_652750	CTGC
TR7997|c0_g1_i1	NODE_1285_length_3255_cov_6.08879_ID_352641	CTAC
TR7997|c0_g1_i1	NODE_1285_length_3255_cov_6.08879_ID_352641	CTAC
TR7997|c0_g1_i1	NODE_1285_length_3255_cov_6.08879_ID_352641	CTAC
TR7997|c0_g1_i1	NODE_1285_length_3255_cov_6.08879_ID_352641	CTAC
TR7997|c0_g1_i1	NODE_1285_length_3255_cov_6.08879_ID_352641	CTAC
TR23559|c0_g1_i1	NODE_12853_length_1615_cov_3.86089_ID_2779926	GTAC
TR29184|c0_g6_i1	NODE_12859_length_1615_cov_10.0638_ID_653296	CTAC
TR29184|c0_g6_i1	NODE_12859_length_1615_cov_10.0638_ID_653296	CTAC
TR29184|c0_g6_i1	NODE_12859_length_1615_cov_10.0638_ID_653296	CTAC
TR6474|c0_g1_i1	NODE_1286_length_3256_cov_8.28658_ID_645510	CTAC
TR10609|c0_g1_i1	NODE_12866_length_1615_cov_1.77755_ID_653452	GTAG
TR10609|c0_g1_i1	NODE_12866_length_1615_cov_1.77755_ID_653452	GTAG
TR27355|c0_g1_i1	NODE_12869_length_1615_cov_6.32728_ID_653530	CTTG
TR2877|c0_g1_i1	NODE_12874_length_1614_cov_0.856086_ID_653660	GTAG
TR49894|c0_g2_i1	NODE_12879_length_1614_cov_4.79623_ID_653790	CTAC
TR43288|c0_g1_i2	NODE_1288_length_3256_cov_6.78843_ID_2378275	CTAC
TR43288|c0_g1_i2	NODE_1288_length_3256_cov_6.78843_ID_2378275	CTAC
TR10673|c0_g1_i1	NODE_12886_length_1614_cov_3.06389_ID_653946	CTAC
TR9476|c0_g2_i1	NODE_12889_length_1612_cov_1.37752_ID_654050	CTAC
TR6960|c0_g1_i2	NODE_1289_length_3254_cov_3.45045_ID_352693	CTAC
TR6960|c0_g1_i2	NODE_1289_length_3254_cov_3.45045_ID_352693	CTAC
TR6960|c0_g1_i2	NODE_1289_length_3254_cov_3.45045_ID_352693	CTAC
TR6960|c0_g1_i2	NODE_1289_length_3254_cov_3.45045_ID_352693	CTAC
TR6960|c0_g1_i2	NODE_1289_length_3254_cov_3.45045_ID_352693	CTAC
TR8988|c3_g1_i1	NODE_12896_length_1613_cov_4.9354_ID_654180	CTAC
TR8988|c3_g1_i1	NODE_12896_length_1613_cov_4.9354_ID_654180	CTAC
TR39819|c0_g1_i1	NODE_12897_length_1613_cov_1.24697_ID_654206	CTAC
TR52046|c0_g1_i2	NODE_129_length_5136_cov_6.14574_ID_430115	CTAC
TR52046|c0_g1_i2	NODE_129_length_5136_cov_6.14574_ID_430115	CTAC
TR41153|c0_g1_i1	NODE_129_length_5136_cov_6.14574_ID_430115	CTAC
TR43288|c0_g1_i2	NODE_1290_length_3253_cov_1.57147_ID_352719	CTAC
TR43288|c0_g1_i2	NODE_1290_length_3253_cov_1.57147_ID_352719	CTAC
TR43288|c0_g1_i2	NODE_1290_length_3253_cov_1.57147_ID_352719	CTAC
TR43288|c0_g1_i2	NODE_1290_length_3253_cov_1.57147_ID_352719	CTGC
TR53684|c0_g1_i1	NODE_12901_length_1612_cov_2.01818_ID_654336	CTGC
TR53684|c0_g1_i1	NODE_12901_length_1612_cov_2.01818_ID_654336	CTGC
TR12772|c0_g2_i1	NODE_12904_length_1612_cov_3.52929_ID_654414	CTAC
TR12772|c0_g2_i1	NODE_12904_length_1612_cov_3.52929_ID_654414	CTAC
TR12772|c0_g2_i1	NODE_12904_length_1612_cov_3.52929_ID_654414	CTAC
TR12772|c0_g2_i1	NODE_12904_length_1612_cov_3.52929_ID_654414	CTAC
TR40677|c0_g1_i1	NODE_12905_length_1612_cov_8.47071_ID_654466	CTAC
TR40677|c0_g1_i1	NODE_12905_length_1612_cov_8.47071_ID_654466	CTAC
TR53684|c0_g1_i1	NODE_12918_length_1612_cov_5.95421_ID_654752	GTAG
TR8988|c3_g1_i1	NODE_1292_length_3253_cov_7.59597_ID_445628	CTAC
TR8988|c3_g1_i1	NODE_1292_length_3253_cov_7.59597_ID_445628	CTAC
TR50465|c0_g1_i1	NODE_1293_length_3241_cov_4.94816_ID_352823	CTAC
TR50465|c0_g1_i1	NODE_1293_length_3241_cov_4.94816_ID_352823	CTAC
TR11070|c0_g3_i1	NODE_12932_length_1611_cov_4.0593_ID_1171630	CTAC
TR39620|c0_g1_i1	NODE_12934_length_1611_cov_5.78908_ID_655090	GTAG
TR40677|c0_g1_i1	NODE_12949_length_1611_cov_4.96833_ID_1613087	GTAG
TR44399|c0_g15_i1	NODE_12960_length_1609_cov_5.41403_ID_1802448	CTAG
TR44399|c0_g15_i1	NODE_12960_length_1609_cov_5.41403_ID_1802448	CTAG
TR43608|c0_g1_i1	NODE_12970_length_1609_cov_2.74157_ID_655922	CTAC
TR43608|c0_g1_i1	NODE_12970_length_1609_cov_2.74157_ID_655922	CTGC
TR41444|c0_g1_i1	NODE_12973_length_1607_cov_3.34548_ID_656026	CTAC
TR39786|c0_g1_i1	NODE_12996_length_1608_cov_17.4119_ID_990360	GTAG
TR41234|c0_g3_i2	NODE_12999_length_1608_cov_1.34369_ID_656650	GTAG
TR39199|c0_g1_i1	NODE_1300_length_3248_cov_2.45242_ID_352979	GGTC
TR8210|c1_g1_i2	NODE_1303_length_3245_cov_1.72579_ID_498655	GTAG
TR519|c0_g1_i1	NODE_1303_length_3245_cov_1.72579_ID_498655	CTAC
TR519|c0_g1_i1	NODE_1303_length_3245_cov_1.72579_ID_498655	CTAC
TR519|c0_g1_i1	NODE_1303_length_3245_cov_1.72579_ID_498655	CTAC
TR519|c0_g1_i1	NODE_1303_length_3245_cov_1.72579_ID_498655	CTAC
TR43493|c0_g1_i1	NODE_13036_length_1606_cov_0.532792_ID_657746	GTAG
TR17352|c0_g1_i2	NODE_1305_length_3244_cov_5.08309_ID_353109	CTAC
TR17352|c0_g1_i2	NODE_1305_length_3244_cov_5.08309_ID_353109	CTAC
TR12078|c4_g11_i1	NODE_13071_length_1605_cov_4.47091_ID_658762	TTAC
TR13131|c0_g3_i1	NODE_13076_length_1606_cov_6.97023_ID_658892	CTAC
TR13131|c0_g3_i1	NODE_13076_length_1606_cov_6.97023_ID_658892	CTAC
TR13131|c0_g3_i1	NODE_13076_length_1606_cov_6.97023_ID_658892	CTAC
TR22768|c0_g1_i1	NODE_13079_length_1604_cov_2.94723_ID_658970	GTAG
TR22768|c0_g1_i1	NODE_13079_length_1604_cov_2.94723_ID_658970	GTAG
TR29248|c0_g1_i3	NODE_13092_length_1604_cov_3.60867_ID_659282	GTAG
TR29248|c0_g1_i3	NODE_13092_length_1604_cov_3.60867_ID_659282	GTAG
TR24026|c1_g4_i8	NODE_13092_length_1604_cov_3.60867_ID_659282	CTAC
TR24026|c1_g4_i8	NODE_13092_length_1604_cov_3.60867_ID_659282	CTAC
TR24026|c1_g4_i8	NODE_13092_length_1604_cov_3.60867_ID_659282	CTAC
TR24026|c1_g4_i8	NODE_13092_length_1604_cov_3.60867_ID_659282	CTAC
TR5249|c0_g1_i1	NODE_13098_length_1604_cov_2.09953_ID_659412	GTAG
TR5249|c0_g1_i1	NODE_13098_length_1604_cov_2.09953_ID_659412	GTAG
TR5249|c0_g1_i1	NODE_13098_length_1604_cov_2.09953_ID_659412	GTAG
TR5249|c0_g1_i1	NODE_13098_length_1604_cov_2.09953_ID_659412	GTAG
TR5249|c0_g1_i1	NODE_13098_length_1604_cov_2.09953_ID_659412	GTAG
TR5249|c0_g1_i1	NODE_13098_length_1604_cov_2.09953_ID_659412	GTAG
TR47903|c0_g1_i4	NODE_13098_length_1604_cov_2.09953_ID_659412	CTTC
TR28891|c0_g2_i1	NODE_1310_length_3241_cov_7.54367_ID_761686	NNNN
TR12619|c0_g5_i1	NODE_13106_length_1603_cov_2.06165_ID_659594	GTAG
TR29697|c0_g1_i1	NODE_13111_length_1603_cov_16.5738_ID_2373609	GCAG
TR29697|c0_g1_i1	NODE_13111_length_1603_cov_16.5738_ID_2373609	GCAG
TR13967|c0_g1_i1	NODE_13115_length_1599_cov_4.70393_ID_659776	GTAG
TR13967|c0_g1_i1	NODE_13115_length_1599_cov_4.70393_ID_659776	GTAG
TR19905|c0_g1_i2	NODE_13115_length_1599_cov_4.70393_ID_659776	CTAC
TR19905|c0_g1_i2	NODE_13115_length_1599_cov_4.70393_ID_659776	CTAC
TR38015|c0_g1_i1	NODE_13121_length_1602_cov_6.04068_ID_659932	CTAC
TR37053|c0_g2_i1	NODE_13125_length_1602_cov_2.84475_ID_660036	CTAC
TR37053|c0_g2_i1	NODE_13125_length_1602_cov_2.84475_ID_660036	CTAC
TR8210|c1_g1_i2	NODE_13126_length_1602_cov_3.64136_ID_660062	CTAC
TR8210|c1_g1_i2	NODE_13126_length_1602_cov_3.64136_ID_660062	CTAC
TR26489|c0_g2_i1	NODE_13129_length_1602_cov_4.16475_ID_660140	CTAC
TR47300|c0_g1_i1	NODE_1313_length_3236_cov_4.156_ID_353343	GTAG
TR47300|c0_g1_i1	NODE_1313_length_3236_cov_4.156_ID_353343	GTAG
TR11029|c4_g2_i9	NODE_1313_length_3236_cov_4.156_ID_353343	CAAC
TR11029|c4_g2_i9	NODE_1313_length_3236_cov_4.156_ID_353343	CTAC
TR11029|c4_g2_i9	NODE_1313_length_3236_cov_4.156_ID_353343	CTAC
TR11029|c4_g2_i9	NODE_1313_length_3236_cov_4.156_ID_353343	CTAC
TR11029|c4_g2_i9	NODE_1313_length_3236_cov_4.156_ID_353343	CTAC
TR9573|c0_g2_i1	NODE_13133_length_1601_cov_3.43419_ID_660244	TTAG
TR9573|c0_g3_i1	NODE_13133_length_1601_cov_3.43419_ID_660244	TTAG
TR40389|c0_g1_i1	NODE_1314_length_3236_cov_4.09971_ID_353369	CTAC
TR40389|c0_g1_i1	NODE_1314_length_3236_cov_4.09971_ID_353369	CTAC
TR40389|c0_g1_i1	NODE_1314_length_3236_cov_4.09971_ID_353369	CTAC
TR40389|c0_g1_i1	NODE_1314_length_3236_cov_4.09971_ID_353369	CTAC
TR40389|c0_g1_i1	NODE_1314_length_3236_cov_4.09971_ID_353369	CTAC
TR9991|c0_g1_i1	NODE_1315_length_3235_cov_7.52992_ID_529053	GTAG
TR1514|c0_g2_i8	NODE_13153_length_1601_cov_3.80733_ID_660850	CTAC
TR21234|c0_g1_i1	NODE_1317_length_3234_cov_2.23327_ID_353421	GTAG
TR21234|c0_g1_i1	NODE_1317_length_3234_cov_2.23327_ID_353421	GTAG
TR12078|c4_g14_i1	NODE_13173_length_1599_cov_6.42498_ID_661370	CAAC
TR25347|c0_g1_i1	NODE_13191_length_1599_cov_5.51495_ID_661812	GTAG
TR25347|c0_g1_i1	NODE_13191_length_1599_cov_5.51495_ID_661812	GTAG
TR37262|c0_g1_i1	NODE_13203_length_1598_cov_0.579878_ID_662072	GTAG
TR13967|c0_g1_i1	NODE_1321_length_3233_cov_13.0873_ID_353525	CTAC
TR13967|c0_g1_i1	NODE_1321_length_3233_cov_13.0873_ID_353525	CTGC
TR19971|c0_g1_i1	NODE_13214_length_1598_cov_4.81577_ID_662410	GTAG
TR19971|c0_g1_i1	NODE_13214_length_1598_cov_4.81577_ID_662410	GTAG
TR13967|c0_g1_i1	NODE_13215_length_1598_cov_2.33243_ID_662436	GTAG
TR8988|c3_g1_i1	NODE_13215_length_1598_cov_2.33243_ID_662436	GTAG
TR8988|c3_g1_i1	NODE_13218_length_1598_cov_5.24813_ID_662514	CTAC
TR30775|c3_g2_i3	NODE_1323_length_3232_cov_7.86924_ID_353577	GTAG
TR24817|c3_g9_i1	NODE_1323_length_3232_cov_7.86924_ID_353577	GTAG
TR42734|c0_g1_i1	NODE_13235_length_1597_cov_4.50272_ID_662956	CTGC
TR21816|c0_g1_i1	NODE_13237_length_1595_cov_1.57823_ID_663008	ATAT
TR21712|c0_g1_i1	NODE_1324_length_3231_cov_6.23582_ID_353603	CTAC
TR21712|c0_g1_i1	NODE_1324_length_3231_cov_6.23582_ID_353603	CTAC
TR37053|c0_g2_i1	NODE_13241_length_1597_cov_6.12109_ID_663112	CTAC
TR39302|c0_g1_i1	NODE_13250_length_1596_cov_10.3799_ID_2439508	GTAG
TR26958|c0_g1_i1	NODE_13256_length_1596_cov_3.92444_ID_663502	CTAC
TR26958|c0_g1_i1	NODE_13256_length_1596_cov_3.92444_ID_663502	CTAC
TR26958|c0_g1_i1	NODE_13256_length_1596_cov_3.92444_ID_663502	CTAC
TR26958|c0_g1_i1	NODE_13256_length_1596_cov_3.92444_ID_663502	CTAC
TR40633|c1_g1_i1	NODE_13264_length_1596_cov_6.63036_ID_663710	TTTG
TR41598|c0_g1_i1	NODE_13266_length_1595_cov_6.77332_ID_663762	CTAC
TR8296|c0_g1_i1	NODE_1327_length_3229_cov_14.6703_ID_632478	CAAA
TR50999|c0_g1_i1	NODE_13287_length_1593_cov_6.29292_ID_664310	CTAC
TR50999|c0_g1_i1	NODE_13287_length_1593_cov_6.29292_ID_664310	CTAC
TR50999|c0_g1_i1	NODE_13287_length_1593_cov_6.29292_ID_664310	CTAC
TR11080|c0_g2_i2	NODE_13290_length_1595_cov_17.1492_ID_920765	CTAC
TR11080|c0_g2_i2	NODE_13290_length_1595_cov_17.1492_ID_920765	CTAC
TR11080|c0_g2_i2	NODE_13290_length_1595_cov_17.1492_ID_920765	CTAC
TR11080|c0_g2_i2	NODE_13290_length_1595_cov_17.1492_ID_920765	CTAC
TR11080|c0_g2_i2	NODE_13290_length_1595_cov_17.1492_ID_920765	CTAC
TR11080|c0_g2_i2	NODE_13290_length_1595_cov_17.1492_ID_920765	CTAC
TR11080|c0_g2_i2	NODE_13290_length_1595_cov_17.1492_ID_920765	CTAC
TR11080|c0_g2_i2	NODE_13290_length_1595_cov_17.1492_ID_920765	CTAC
TR11080|c0_g2_i2	NODE_13290_length_1595_cov_17.1492_ID_920765	CTAC
TR11080|c0_g2_i2	NODE_13290_length_1595_cov_17.1492_ID_920765	CTAC
TR11080|c0_g2_i2	NODE_13290_length_1595_cov_17.1492_ID_920765	CTAC
TR11080|c0_g2_i2	NODE_13290_length_1595_cov_17.1492_ID_920765	CTAC
TR11080|c0_g2_i2	NODE_13290_length_1595_cov_17.1492_ID_920765	CTAC
TR11080|c0_g2_i2	NODE_13290_length_1595_cov_17.1492_ID_920765	CTAC
TR11080|c0_g2_i2	NODE_13290_length_1595_cov_17.1492_ID_920765	CTAC
TR28394|c1_g1_i1	NODE_13300_length_1595_cov_8.4203_ID_664704	CTAC
TR50465|c0_g1_i1	NODE_13303_length_1595_cov_4.60014_ID_664782	CTAC
TR40389|c0_g1_i1	NODE_13306_length_1595_cov_5.31199_ID_664860	GTAG
TR40389|c0_g1_i1	NODE_13306_length_1595_cov_5.31199_ID_664860	GTAG
TR24026|c1_g4_i8	NODE_13306_length_1595_cov_5.31199_ID_664860	GTAG
TR24026|c1_g4_i8	NODE_13306_length_1595_cov_5.31199_ID_664860	GTAG
TR24026|c1_g4_i8	NODE_13306_length_1595_cov_5.31199_ID_664860	GTAG
TR24026|c1_g4_i8	NODE_13306_length_1595_cov_5.31199_ID_664860	GTAG
TR16715|c0_g1_i2	NODE_1331_length_3227_cov_2.42774_ID_353707	CTAC
TR16715|c0_g1_i2	NODE_1331_length_3227_cov_2.42774_ID_353707	CTAC
TR16715|c0_g1_i2	NODE_1331_length_3227_cov_2.42774_ID_353707	CTAC
TR16715|c0_g1_i2	NODE_1331_length_3227_cov_2.42774_ID_353707	CTAC
TR41598|c0_g1_i1	NODE_13314_length_1594_cov_4.20177_ID_665232	GCAG
TR7038|c0_g1_i2	NODE_1333_length_3224_cov_2.05776_ID_353759	GTAG
TR7038|c0_g1_i2	NODE_1333_length_3224_cov_2.05776_ID_353759	GTAG
TR28527|c0_g1_i1	NODE_13345_length_1592_cov_4.99795_ID_665988	GTAG
TR5058|c0_g1_i1	NODE_1335_length_3223_cov_3.58102_ID_353811	CTAC
TR5058|c0_g1_i1	NODE_1335_length_3223_cov_3.58102_ID_353811	CTAC
TR3047|c0_g1_i1	NODE_13368_length_1590_cov_7.51503_ID_666586	CTAC
TR3047|c0_g1_i1	NODE_13368_length_1590_cov_7.51503_ID_666586	CTAC
TR3047|c0_g1_i1	NODE_13368_length_1590_cov_7.51503_ID_666586	CTAC
TR3047|c0_g1_i1	NODE_13368_length_1590_cov_7.51503_ID_666586	CTAC
TR3047|c0_g1_i1	NODE_13368_length_1590_cov_7.51503_ID_666586	CTAC
TR3047|c0_g1_i1	NODE_13368_length_1590_cov_7.51503_ID_666586	CTAC
TR13967|c0_g1_i1	NODE_1337_length_3225_cov_1.58296_ID_353837	CTAC
TR13967|c0_g1_i1	NODE_1337_length_3225_cov_1.58296_ID_353837	CTAC
TR13967|c0_g1_i1	NODE_1337_length_3225_cov_1.58296_ID_353837	CTAC
TR40389|c0_g1_i1	NODE_13370_length_1589_cov_4.63661_ID_666638	CTAC
TR40389|c0_g1_i1	NODE_13370_length_1589_cov_4.63661_ID_666638	CTAC
TR16715|c0_g1_i2	NODE_13377_length_1591_cov_2.04167_ID_666820	CTAC
TR16715|c0_g1_i2	NODE_13377_length_1591_cov_2.04167_ID_666820	CTAC
TR48469|c0_g1_i1	NODE_13382_length_1590_cov_6.74846_ID_666950	GTAG
TR48469|c0_g1_i1	NODE_13382_length_1590_cov_6.74846_ID_666950	GTAG
TR27119|c0_g1_i1	NODE_13394_length_1590_cov_2.92481_ID_667262	GTAG
TR5531|c0_g1_i1	NODE_13398_length_1590_cov_4.98975_ID_667366	CTAC
TR46143|c0_g3_i1	NODE_13404_length_1589_cov_2.08892_ID_667574	GTAG
TR46143|c0_g3_i1	NODE_13404_length_1589_cov_2.08892_ID_667574	GTAG
TR29985|c0_g1_i1	NODE_1342_length_3221_cov_5.63381_ID_356697	CTAC
TR29985|c0_g1_i1	NODE_1342_length_3221_cov_5.63381_ID_356697	CTAC
TR17575|c0_g1_i1	NODE_13427_length_1588_cov_5.13758_ID_668094	CTAC
TR5531|c0_g1_i1	NODE_1343_length_3221_cov_6.7201_ID_647704	GTAG
TR5531|c0_g1_i1	NODE_1343_length_3221_cov_6.7201_ID_647704	GTAG
TR5531|c0_g1_i1	NODE_1343_length_3221_cov_6.7201_ID_647704	GTAG
TR831|c0_g3_i3	NODE_1344_length_3220_cov_7.48384_ID_353941	CTAC
TR831|c0_g3_i3	NODE_1344_length_3220_cov_7.48384_ID_353941	CTAC
TR831|c0_g3_i3	NODE_1344_length_3220_cov_7.48384_ID_353941	CTAC
TR52452|c0_g1_i1	NODE_13441_length_1588_cov_1.92813_ID_668484	GTAG
TR32180|c3_g10_i2	NODE_13450_length_1588_cov_4.50445_ID_668718	CTAC
TR32180|c3_g10_i2	NODE_13450_length_1588_cov_4.50445_ID_668718	CTAC
TR32180|c3_g10_i2	NODE_13450_length_1588_cov_4.50445_ID_668718	CTAC
TR32180|c3_g10_i2	NODE_13450_length_1588_cov_4.50445_ID_668718	CTAC
TR32180|c3_g10_i2	NODE_13450_length_1588_cov_4.50445_ID_668718	CTAC
TR32180|c3_g10_i2	NODE_13450_length_1588_cov_4.50445_ID_668718	CTAC
TR32180|c3_g10_i2	NODE_13450_length_1588_cov_4.50445_ID_668718	CTAC
TR32180|c3_g10_i2	NODE_13450_length_1588_cov_4.50445_ID_668718	CTAC
TR32180|c3_g10_i2	NODE_13450_length_1588_cov_4.50445_ID_668718	CTAC
TR32180|c3_g10_i2	NODE_13450_length_1588_cov_4.50445_ID_668718	CTAC
TR32180|c3_g10_i2	NODE_13450_length_1588_cov_4.50445_ID_668718	CTAC
TR32180|c3_g10_i2	NODE_13450_length_1588_cov_4.50445_ID_668718	CTAC
TR32180|c3_g10_i2	NODE_13450_length_1588_cov_4.50445_ID_668718	CTAC
TR32180|c3_g10_i2	NODE_13450_length_1588_cov_4.50445_ID_668718	CTAC
TR32180|c3_g10_i2	NODE_13450_length_1588_cov_4.50445_ID_668718	CTAC
TR32180|c3_g10_i2	NODE_13450_length_1588_cov_4.50445_ID_668718	CTAC
TR32180|c3_g10_i2	NODE_13450_length_1588_cov_4.50445_ID_668718	CTAC
TR32180|c3_g10_i2	NODE_13450_length_1588_cov_4.50445_ID_668718	CTAC
TR32180|c3_g10_i2	NODE_13450_length_1588_cov_4.50445_ID_668718	CTAC
TR32180|c3_g10_i2	NODE_13450_length_1588_cov_4.50445_ID_668718	CTAC
TR32180|c3_g10_i2	NODE_13450_length_1588_cov_4.50445_ID_668718	CTAC
TR32180|c3_g10_i2	NODE_13450_length_1588_cov_4.50445_ID_668718	CTAC
TR32180|c3_g10_i2	NODE_13450_length_1588_cov_4.50445_ID_668718	CTAC
TR32180|c3_g10_i2	NODE_13450_length_1588_cov_4.50445_ID_668718	CTAC
TR21712|c0_g1_i1	NODE_13450_length_1588_cov_4.50445_ID_668718	CTAC
TR21712|c0_g1_i1	NODE_13450_length_1588_cov_4.50445_ID_668718	CTAC
TR21712|c0_g1_i1	NODE_13450_length_1588_cov_4.50445_ID_668718	CTAC
TR28394|c1_g1_i1	NODE_1346_length_3219_cov_7.15815_ID_353967	CTAC
TR28394|c1_g1_i1	NODE_1346_length_3219_cov_7.15815_ID_353967	CTGC
TR28394|c1_g1_i1	NODE_1346_length_3219_cov_7.15815_ID_353967	CTAC
TR28394|c1_g1_i1	NODE_1346_length_3219_cov_7.15815_ID_353967	CTGC
TR23559|c0_g1_i1	NODE_1347_length_3220_cov_9.00129_ID_353993	GTAG
TR29175|c0_g1_i2	NODE_13481_length_1589_cov_3.10281_ID_669420	GCAG
TR29175|c0_g1_i2	NODE_13481_length_1589_cov_3.10281_ID_669420	GCAG
TR29175|c0_g1_i2	NODE_13481_length_1589_cov_3.10281_ID_669420	GTAG
TR29175|c0_g1_i2	NODE_13481_length_1589_cov_3.10281_ID_669420	GTAG
TR10720|c0_g1_i1	NODE_13489_length_1586_cov_8.22961_ID_669628	TTAA
TR39946|c0_g1_i2	NODE_13492_length_1584_cov_1.42289_ID_669732	GTAG
TR39946|c0_g1_i2	NODE_13492_length_1584_cov_1.42289_ID_669732	GTAG
TR39946|c0_g1_i2	NODE_13492_length_1584_cov_1.42289_ID_669732	GTAG
TR39946|c0_g1_i2	NODE_13492_length_1584_cov_1.42289_ID_669732	GTAG
TR28303|c0_g1_i1	NODE_135_length_5115_cov_8.02205_ID_329753	CTAC
TR28303|c0_g1_i1	NODE_135_length_5115_cov_8.02205_ID_329753	CTAC
TR28303|c0_g1_i1	NODE_135_length_5115_cov_8.02205_ID_329753	CTAC
TR40291|c0_g2_i1	NODE_13500_length_1585_cov_4.80933_ID_669966	CTAC
TR49337|c0_g1_i1	NODE_1351_length_3214_cov_11.481_ID_354071	GTAG
TR208|c1_g4_i1	NODE_13514_length_1586_cov_4.97737_ID_670382	CTAC
TR208|c1_g4_i1	NODE_13514_length_1586_cov_4.97737_ID_670382	CTAC
TR208|c1_g4_i1	NODE_13514_length_1586_cov_4.97737_ID_670382	CTAC
TR208|c1_g4_i1	NODE_13514_length_1586_cov_4.97737_ID_670382	CTAC
TR208|c1_g4_i1	NODE_13514_length_1586_cov_4.97737_ID_670382	CTAC
TR208|c1_g4_i1	NODE_13514_length_1586_cov_4.97737_ID_670382	CTAC
TR53328|c0_g1_i1	NODE_13525_length_1584_cov_4.63281_ID_670668	CTAC
TR4403|c0_g1_i1	NODE_1353_length_3213_cov_6.72262_ID_354123	CTAC
TR4403|c0_g1_i1	NODE_1353_length_3213_cov_6.72262_ID_354123	CTAC
TR4403|c0_g1_i1	NODE_1353_length_3213_cov_6.72262_ID_354123	CTAC
TR4403|c0_g1_i1	NODE_1353_length_3213_cov_6.72262_ID_354123	CTGC
TR3047|c0_g1_i1	NODE_1355_length_3212_cov_5.62516_ID_387432	CTAC
TR3047|c0_g1_i1	NODE_1355_length_3212_cov_5.62516_ID_387432	CTAC
TR15760|c0_g1_i1	NODE_13560_length_1582_cov_6.97663_ID_671632	CTAC
TR15760|c0_g1_i1	NODE_13560_length_1582_cov_6.97663_ID_671632	CTAC
TR487|c0_g1_i2	NODE_13570_length_1581_cov_3.13274_ID_671918	GTAG
TR487|c0_g1_i2	NODE_13570_length_1581_cov_3.13274_ID_671918	GTAG
TR487|c0_g1_i2	NODE_13570_length_1581_cov_3.13274_ID_671918	GTAG
TR48224|c0_g2_i1	NODE_13574_length_1580_cov_1.09422_ID_672022	CTAC
TR40508|c0_g6_i1	NODE_13575_length_1581_cov_4.41403_ID_672048	GCAG
TR40508|c0_g6_i1	NODE_13575_length_1581_cov_4.41403_ID_672048	GTAG
TR40508|c0_g6_i1	NODE_13575_length_1581_cov_4.41403_ID_672048	GTAG
TR11070|c0_g3_i1	NODE_13577_length_1581_cov_3.20289_ID_672126	GTAG
TR11070|c0_g3_i1	NODE_13577_length_1581_cov_3.20289_ID_672126	GTAG
TR51928|c0_g1_i1	NODE_13585_length_1574_cov_7.67125_ID_672360	ATAG
TR47907|c0_g4_i2	NODE_13587_length_1580_cov_2.79766_ID_672412	GTAG
TR47907|c0_g4_i2	NODE_13587_length_1580_cov_2.79766_ID_672412	GTAG
TR47907|c0_g4_i2	NODE_13587_length_1580_cov_2.79766_ID_672412	GTAG
TR47907|c0_g4_i2	NODE_13587_length_1580_cov_2.79766_ID_672412	GTAG
TR47907|c0_g4_i2	NODE_13587_length_1580_cov_2.79766_ID_672412	GTAG
TR47907|c0_g4_i2	NODE_13587_length_1580_cov_2.79766_ID_672412	GTAG
TR47907|c0_g4_i2	NODE_13587_length_1580_cov_2.79766_ID_672412	GTAG
TR28741|c0_g1_i1	NODE_1361_length_3208_cov_5.6803_ID_354279	GTAG
TR28741|c0_g1_i1	NODE_13612_length_1579_cov_4.33196_ID_672958	GCAG
TR28741|c0_g1_i1	NODE_13612_length_1579_cov_4.33196_ID_672958	GTAG
TR40291|c0_g2_i1	NODE_1362_length_3210_cov_4.25089_ID_354305	CTAC
TR40291|c0_g2_i1	NODE_1362_length_3210_cov_4.25089_ID_354305	CTAC
TR40291|c0_g2_i1	NODE_1362_length_3210_cov_4.25089_ID_354305	CTAC
TR40291|c0_g2_i1	NODE_1362_length_3210_cov_4.25089_ID_354305	CTAC
TR23559|c0_g1_i1	NODE_13624_length_1579_cov_4.27342_ID_673244	CTAC
TR23559|c0_g1_i1	NODE_13624_length_1579_cov_4.27342_ID_673244	CTAC
TR23559|c0_g1_i1	NODE_13624_length_1579_cov_4.27342_ID_673244	CTAC
TR23559|c0_g1_i1	NODE_13624_length_1579_cov_4.27342_ID_673244	CTAC
TR15621|c0_g1_i2	NODE_13632_length_1578_cov_2.15575_ID_673452	CTAC
TR11294|c0_g1_i1	NODE_13641_length_1578_cov_4.38525_ID_673686	GTAG
TR11070|c0_g3_i1	NODE_13647_length_1571_cov_4.39241_ID_673868	CTAC
TR39585|c0_g1_i1	NODE_13653_length_1577_cov_8.19517_ID_674024	CTAC
TR39585|c0_g1_i1	NODE_13653_length_1577_cov_8.19517_ID_674024	CTAC
TR11915|c0_g1_i1	NODE_13659_length_1577_cov_2.78621_ID_674180	CTAC
TR21234|c0_g1_i1	NODE_13663_length_1576_cov_4.82195_ID_674336	CTAC
TR21234|c0_g1_i1	NODE_13663_length_1576_cov_4.82195_ID_674336	CTAC
TR48381|c0_g1_i1	NODE_13667_length_1576_cov_2.5735_ID_674414	CTAC
TR28157|c1_g4_i1	NODE_13668_length_1576_cov_5.73223_ID_674440	GTAG
TR28157|c1_g4_i1	NODE_13668_length_1576_cov_5.73223_ID_674440	GTAG
TR37053|c0_g2_i1	NODE_1367_length_3205_cov_3.99545_ID_354409	CTAC
TR3218|c0_g1_i1	NODE_1367_length_3205_cov_3.99545_ID_354409	CTAC
TR3218|c0_g1_i1	NODE_1367_length_3205_cov_3.99545_ID_354409	CTAC
TR3218|c0_g1_i1	NODE_1367_length_3205_cov_3.99545_ID_354409	CTAC
TR21712|c0_g1_i1	NODE_13673_length_1576_cov_6.15873_ID_959316	CTAC
TR8988|c3_g1_i1	NODE_13687_length_1574_cov_2.55387_ID_675012	GTAG
TR8988|c3_g1_i1	NODE_13687_length_1574_cov_2.55387_ID_675012	GTAG
TR8988|c3_g1_i1	NODE_13687_length_1574_cov_2.55387_ID_675012	GTAG
TR8988|c3_g1_i1	NODE_13687_length_1574_cov_2.55387_ID_675012	GTAG
TR8988|c3_g1_i1	NODE_13687_length_1574_cov_2.55387_ID_675012	GTAG
TR8988|c3_g1_i1	NODE_13687_length_1574_cov_2.55387_ID_675012	GTAG
TR8988|c3_g1_i1	NODE_13687_length_1574_cov_2.55387_ID_675012	GTAG
TR8988|c3_g1_i1	NODE_13687_length_1574_cov_2.55387_ID_675012	GTAG
TR20948|c0_g1_i1	NODE_13687_length_1574_cov_2.55387_ID_675012	CTAC
TR36922|c0_g1_i1	NODE_13696_length_1574_cov_8.62362_ID_675305	CTAC
TR192|c0_g10_i1	NODE_13697_length_1574_cov_1.55771_ID_675331	GCAG
TR192|c0_g10_i1	NODE_13697_length_1574_cov_1.55771_ID_675331	GCAG
TR39946|c0_g1_i2	NODE_1370_length_3205_cov_6.47321_ID_354487	GTAG
TR39946|c0_g1_i2	NODE_1370_length_3205_cov_6.47321_ID_354487	GTAG
TR39946|c0_g1_i2	NODE_1370_length_3205_cov_6.47321_ID_354487	GTAG
TR12772|c0_g2_i1	NODE_13705_length_1574_cov_3.10297_ID_675539	GTAG
TR12772|c0_g2_i1	NODE_13705_length_1574_cov_3.10297_ID_675539	GTAG
TR12772|c0_g2_i1	NODE_13705_length_1574_cov_3.10297_ID_675539	GTAG
TR29985|c0_g1_i1	NODE_13706_length_1574_cov_4.26123_ID_675565	GTAG
TR10720|c0_g1_i1	NODE_13712_length_1574_cov_7.08362_ID_675721	CTAC
TR1364|c0_g1_i1	NODE_13728_length_1573_cov_2.37414_ID_676277	CTAC
TR1364|c0_g1_i1	NODE_13728_length_1573_cov_2.37414_ID_676277	GTAT
TR1243|c0_g1_i1	NODE_13735_length_1572_cov_2.01938_ID_676433	GTAG
TR40419|c0_g1_i1	NODE_13738_length_1572_cov_3.27474_ID_676485	GTTC
TR25092|c3_g9_i9	NODE_13749_length_1571_cov_15.6263_ID_676797	CTAC
TR24574|c0_g1_i1	NODE_13753_length_1571_cov_3.57064_ID_2470084	CTAC
TR45940|c0_g1_i1	NODE_13758_length_1571_cov_13.4896_ID_677085	CTAC
TR45940|c0_g1_i1	NODE_13758_length_1571_cov_13.4896_ID_677085	CTAC
TR19828|c0_g1_i1	NODE_1376_length_3200_cov_5.99349_ID_354669	CAAA
TR19828|c0_g1_i1	NODE_1376_length_3200_cov_5.99349_ID_354669	CTTT
TR29248|c0_g1_i3	NODE_13762_length_1567_cov_6.29571_ID_677215	CTAC
TR29248|c0_g1_i3	NODE_13762_length_1567_cov_6.29571_ID_677215	CTAC
TR11029|c4_g2_i9	NODE_13776_length_1570_cov_5.12821_ID_677683	CTAC
TR11029|c4_g2_i9	NODE_13776_length_1570_cov_5.12821_ID_677683	CTAC
TR11029|c4_g2_i9	NODE_13776_length_1570_cov_5.12821_ID_677683	CTAC
TR30591|c0_g1_i1	NODE_13778_length_1570_cov_6.04366_ID_677735	ATAG
TR30591|c0_g1_i1	NODE_13778_length_1570_cov_6.04366_ID_677735	ATAG
TR30591|c0_g1_i1	NODE_13778_length_1570_cov_6.04366_ID_677735	ATAG
TR30591|c0_g1_i1	NODE_13778_length_1570_cov_6.04366_ID_677735	ATAG
TR22945|c0_g2_i1	NODE_13804_length_1568_cov_4.92713_ID_678515	CTAC
TR22945|c0_g2_i1	NODE_13804_length_1568_cov_4.92713_ID_678515	CTAC
TR22945|c0_g2_i1	NODE_13804_length_1568_cov_4.92713_ID_678515	CTAC
TR22945|c0_g2_i1	NODE_13804_length_1568_cov_4.92713_ID_678515	CTAC
TR38941|c0_g1_i1	NODE_13805_length_1568_cov_4.27412_ID_678541	CTAC
TR38941|c0_g1_i1	NODE_13805_length_1568_cov_4.27412_ID_678541	CTAC
TR34904|c0_g2_i1	NODE_13813_length_1568_cov_9.87231_ID_678775	CTAC
TR34904|c0_g2_i1	NODE_13813_length_1568_cov_9.87231_ID_678775	CTAC
TR17700|c0_g1_i1	NODE_13825_length_1567_cov_4.28194_ID_679035	ATAA
TR15936|c0_g1_i1	NODE_13828_length_1567_cov_3.34306_ID_679113	GTAG
TR11034|c1_g17_i1	NODE_1383_length_3198_cov_10.4611_ID_354773	CTAC
TR11034|c1_g17_i1	NODE_1383_length_3198_cov_10.4611_ID_354773	CTAC
TR11034|c1_g17_i1	NODE_1383_length_3198_cov_10.4611_ID_354773	CTAC
TR11034|c1_g17_i1	NODE_1383_length_3198_cov_10.4611_ID_354773	CTAC
TR11034|c1_g17_i1	NODE_1383_length_3198_cov_10.4611_ID_354773	CTAC
TR17605|c0_g1_i1	NODE_1384_length_3196_cov_5.38612_ID_354799	GTAG
TR17605|c0_g1_i1	NODE_1384_length_3196_cov_5.38612_ID_354799	GTAG
TR17605|c0_g1_i1	NODE_1384_length_3196_cov_5.38612_ID_354799	GTAG
TR17605|c0_g1_i1	NODE_1384_length_3196_cov_5.38612_ID_354799	GTAG
TR17605|c0_g1_i1	NODE_1384_length_3196_cov_5.38612_ID_354799	GTAG
TR17605|c0_g1_i1	NODE_1384_length_3196_cov_5.38612_ID_354799	GTAG
TR27427|c0_g1_i2	NODE_13846_length_1566_cov_2.91661_ID_679633	GCAG
TR10673|c0_g1_i1	NODE_13855_length_1566_cov_2.45657_ID_679919	CTAC
TR10673|c0_g1_i1	NODE_13855_length_1566_cov_2.45657_ID_679919	CTAC
TR24063|c0_g1_i1	NODE_13859_length_1566_cov_3.89229_ID_680023	CTAC
TR34914|c0_g1_i1	NODE_13861_length_1566_cov_3.64837_ID_680075	CTAC
TR45681|c0_g1_i1	NODE_13865_length_1566_cov_4.52814_ID_680179	GTAG
TR19971|c0_g1_i1	NODE_1387_length_3191_cov_4.54534_ID_354851	CTAC
TR19971|c0_g1_i1	NODE_1387_length_3191_cov_4.54534_ID_354851	CTAC
TR4909|c1_g1_i1	NODE_13871_length_1565_cov_3.48401_ID_680335	GTAG
TR47907|c0_g4_i2	NODE_13874_length_1565_cov_3.03686_ID_680413	CTAC
TR2987|c0_g5_i1	NODE_13879_length_1565_cov_9.45202_ID_680517	GTAG
TR2987|c0_g5_i1	NODE_13879_length_1565_cov_9.45202_ID_680517	GTAG
TR5058|c0_g1_i2	NODE_1388_length_3192_cov_3.77162_ID_388316	ATGG
TR5058|c0_g1_i2	NODE_1388_length_3192_cov_3.77162_ID_388316	GTAG
TR5058|c0_g1_i2	NODE_1388_length_3192_cov_3.77162_ID_388316	GTAG
TR5058|c0_g1_i2	NODE_1388_length_3192_cov_3.77162_ID_388316	GTAG
TR5058|c0_g1_i2	NODE_1388_length_3192_cov_3.77162_ID_388316	GTAG
TR5058|c0_g1_i1	NODE_1388_length_3192_cov_3.77162_ID_388316	GTAG
TR5058|c0_g1_i1	NODE_1388_length_3192_cov_3.77162_ID_388316	TGAG
TR5058|c0_g1_i1	NODE_1388_length_3192_cov_3.77162_ID_388316	TGAG
TR35182|c0_g1_i1	NODE_13885_length_1565_cov_4.7274_ID_680673	GCAG
TR35182|c0_g1_i1	NODE_13885_length_1565_cov_4.7274_ID_680673	GTAG
TR52669|c0_g1_i1	NODE_13899_length_1567_cov_1.01392_ID_681089	CTAC
TR52452|c0_g1_i1	NODE_1392_length_3189_cov_2.54115_ID_354929	GTAG
TR54048|c0_g1_i2	NODE_13930_length_1563_cov_3.47841_ID_681869	CTAC
TR4506|c0_g1_i1	NODE_13941_length_1563_cov_2.65111_ID_682129	GTAG
TR23335|c0_g2_i2	NODE_13958_length_1562_cov_2.10174_ID_682519	ACCG
TR23335|c0_g2_i1	NODE_13958_length_1562_cov_2.10174_ID_682519	GTGC
TR23335|c0_g2_i1	NODE_13958_length_1562_cov_2.10174_ID_682519	GTGC
TR23335|c0_g2_i2	NODE_13958_length_1562_cov_2.10174_ID_682519	TTCG
TR23335|c0_g2_i2	NODE_13958_length_1562_cov_2.10174_ID_682519	CTGC
TR21234|c0_g1_i1	NODE_13973_length_1562_cov_2.37491_ID_682909	GTAG
TR253|c0_g1_i3	NODE_1398_length_3186_cov_3.42334_ID_355007	CTAC
TR19971|c0_g1_i1	NODE_13986_length_1561_cov_3.68061_ID_683247	GTAG
TR19971|c0_g1_i1	NODE_13986_length_1561_cov_3.68061_ID_683247	GTAG
TR19971|c0_g1_i1	NODE_13986_length_1561_cov_3.68061_ID_683247	GTAG
TR19971|c0_g1_i1	NODE_13986_length_1561_cov_3.68061_ID_683247	GTAG
TR47306|c1_g2_i1	NODE_13987_length_1562_cov_3.43724_ID_683273	GTAG
TR40551|c0_g1_i1	NODE_13987_length_1562_cov_3.43724_ID_683273	GTAG
TR40677|c0_g1_i1	NODE_13987_length_1562_cov_3.43724_ID_683273	GTAG
TR1645|c0_g1_i1	NODE_14_length_6903_cov_4.93743_ID_380089	GCAG
TR1645|c0_g1_i1	NODE_14_length_6903_cov_4.93743_ID_380089	GTAG
TR1645|c0_g1_i1	NODE_14_length_6903_cov_4.93743_ID_380089	GTAG
TR1005|c0_g1_i1	NODE_140_length_5078_cov_6.92002_ID_329857	GTAG
TR1005|c0_g1_i1	NODE_140_length_5078_cov_6.92002_ID_329857	GTAG
TR1005|c0_g1_i1	NODE_140_length_5078_cov_6.92002_ID_329857	GTAG
TR1005|c0_g1_i1	NODE_140_length_5078_cov_6.92002_ID_329857	GTAG
TR1005|c0_g1_i1	NODE_140_length_5078_cov_6.92002_ID_329857	GTAG
TR1005|c0_g1_i1	NODE_140_length_5078_cov_6.92002_ID_329857	GTAG
TR7482|c0_g2_i1	NODE_14013_length_1560_cov_8.903_ID_684027	GTAG
TR17079|c0_g1_i1	NODE_14023_length_1557_cov_1.68226_ID_684313	GTAG
TR11877|c0_g1_i1	NODE_14024_length_1558_cov_2.50279_ID_684339	CTAC
TR6474|c0_g1_i1	NODE_14025_length_1559_cov_6.49581_ID_684365	CTGC
TR51773|c0_g7_i1	NODE_14028_length_1558_cov_1.8764_ID_684443	CGAG
TR51773|c0_g1_i1	NODE_14028_length_1558_cov_1.8764_ID_684443	CGAG
TR51773|c0_g7_i1	NODE_14028_length_1558_cov_1.8764_ID_684443	CGAG
TR2491|c0_g2_i1	NODE_14032_length_1559_cov_2.43994_ID_684547	GTAG
TR2491|c0_g2_i1	NODE_14032_length_1559_cov_2.43994_ID_684547	GTAG
TR2491|c0_g2_i1	NODE_14032_length_1559_cov_2.43994_ID_684547	GTAG
TR30407|c0_g1_i2	NODE_14055_length_1557_cov_1.15874_ID_685171	GCAG
TR30407|c0_g1_i2	NODE_14055_length_1557_cov_1.15874_ID_685171	GTAG
TR30407|c0_g1_i2	NODE_14055_length_1557_cov_1.15874_ID_685171	GTAG
TR30407|c0_g1_i2	NODE_14055_length_1557_cov_1.15874_ID_685171	GTAG
TR30407|c0_g1_i2	NODE_14055_length_1557_cov_1.15874_ID_685171	GTAG
TR28517|c0_g1_i1	NODE_14062_length_1557_cov_4.23427_ID_685379	CTAC
TR28517|c0_g1_i1	NODE_14062_length_1557_cov_4.23427_ID_685379	CTGC
TR8210|c1_g1_i2	NODE_14063_length_1557_cov_10.1951_ID_1280055	GCGG
TR8210|c1_g1_i2	NODE_14063_length_1557_cov_10.1951_ID_1280055	GCGG
TR34716|c0_g1_i2	NODE_1409_length_3178_cov_4.17824_ID_2556018	GTAG
TR34716|c0_g1_i2	NODE_1409_length_3178_cov_4.17824_ID_2556018	GTAG
TR48538|c0_g7_i7	NODE_1409_length_3178_cov_4.17824_ID_2556018	CTAC
TR48538|c0_g7_i7	NODE_1409_length_3178_cov_4.17824_ID_2556018	CTAC
TR48538|c0_g7_i7	NODE_1409_length_3178_cov_4.17824_ID_2556018	CTAC
TR48538|c0_g7_i7	NODE_1409_length_3178_cov_4.17824_ID_2556018	CTAC
TR50989|c0_g1_i1	NODE_14096_length_1555_cov_11.0133_ID_686315	GTAG
TR50989|c0_g1_i1	NODE_14096_length_1555_cov_11.0133_ID_686315	GTAG
TR28741|c0_g1_i1	NODE_14115_length_1554_cov_5.42537_ID_686903	CTGC
TR28517|c0_g1_i1	NODE_14120_length_1554_cov_2.9075_ID_687059	CTGC
TR32180|c3_g6_i2	NODE_14129_length_1547_cov_4.58795_ID_687293	CTAC
TR4930|c0_g1_i1	NODE_1413_length_3177_cov_3.95116_ID_355397	CTAG
TR4930|c0_g1_i1	NODE_1413_length_3177_cov_3.95116_ID_355397	GTAG
TR4930|c0_g1_i1	NODE_1413_length_3177_cov_3.95116_ID_355397	GTAG
TR48344|c0_g1_i1	NODE_14130_length_1554_cov_11.5256_ID_687397	GCAG
TR14189|c0_g1_i2	NODE_14133_length_1553_cov_6.49615_ID_687475	CTAC
TR14189|c0_g1_i2	NODE_14133_length_1553_cov_6.49615_ID_687475	CTAC
TR37206|c0_g1_i1	NODE_14143_length_1553_cov_9.57013_ID_2743956	CTAC
TR4506|c0_g1_i1	NODE_14147_length_1553_cov_1.35344_ID_687839	CTAC
TR4506|c0_g1_i1	NODE_14147_length_1553_cov_1.35344_ID_687839	CTAC
TR45681|c0_g1_i1	NODE_1415_length_3177_cov_4.54984_ID_355449	GTAG
TR45681|c0_g1_i1	NODE_1415_length_3177_cov_4.54984_ID_355449	GTAG
TR45681|c0_g1_i1	NODE_1415_length_3177_cov_4.54984_ID_355449	GTAG
TR7787|c0_g4_i1	NODE_1416_length_3176_cov_4.88127_ID_748788	GCAG
TR7787|c0_g4_i1	NODE_1416_length_3176_cov_4.88127_ID_748788	GTAG
TR28303|c0_g1_i1	NODE_14160_length_1552_cov_6.74755_ID_688229	CTAC
TR11034|c1_g17_i1	NODE_14167_length_1552_cov_4.67509_ID_2468750	GTAG
TR28968|c0_g2_i1	NODE_14178_length_1551_cov_1.26966_ID_688697	GTAG
TR28968|c0_g2_i1	NODE_14178_length_1551_cov_1.26966_ID_688697	GTAG
TR28968|c0_g2_i1	NODE_14178_length_1551_cov_1.26966_ID_688697	GTAG
TR26450|c0_g1_i1	NODE_1418_length_3174_cov_8.56351_ID_355501	CTAC
TR26450|c0_g1_i1	NODE_1418_length_3174_cov_8.56351_ID_355501	CTAC
TR26450|c0_g1_i1	NODE_1418_length_3174_cov_8.56351_ID_355501	CTAC
TR26450|c0_g1_i1	NODE_1418_length_3174_cov_8.56351_ID_355501	CTAC
TR26450|c0_g1_i1	NODE_1418_length_3174_cov_8.56351_ID_355501	CTAC
TR26450|c0_g1_i1	NODE_1418_length_3174_cov_8.56351_ID_355501	CTAC
TR26450|c0_g1_i1	NODE_1418_length_3174_cov_8.56351_ID_355501	CTAC
TR26450|c0_g1_i1	NODE_1418_length_3174_cov_8.56351_ID_355501	CTAC
TR46143|c0_g2_i1	NODE_14180_length_1551_cov_2.69382_ID_688749	ATAG
TR46143|c0_g1_i1	NODE_14180_length_1551_cov_2.69382_ID_688749	ATAG
TR46143|c0_g5_i1	NODE_14180_length_1551_cov_2.69382_ID_688749	ATAG
TR46143|c0_g3_i1	NODE_14180_length_1551_cov_2.69382_ID_688749	GAAG
TR28415|c0_g1_i1	NODE_1419_length_3171_cov_4.39547_ID_540775	GTAG
TR1166|c0_g2_i1	NODE_14205_length_1551_cov_6.10112_ID_689399	GAAG
TR1166|c0_g2_i1	NODE_14205_length_1551_cov_6.10112_ID_689399	CGAG
TR1166|c0_g2_i1	NODE_14205_length_1551_cov_6.10112_ID_689399	GTAG
TR30407|c0_g1_i2	NODE_14206_length_1551_cov_8.50421_ID_689425	CTAC
TR11650|c0_g1_i1	NODE_1421_length_3172_cov_4.07718_ID_355553	GTAG
TR40647|c0_g1_i1	NODE_1422_length_3170_cov_3.41511_ID_355579	CTAC
TR40647|c0_g1_i1	NODE_1422_length_3170_cov_3.41511_ID_355579	CTAC
TR40647|c0_g1_i1	NODE_1422_length_3170_cov_3.41511_ID_355579	CTAC
TR48344|c0_g1_i1	NODE_14221_length_1549_cov_5.85945_ID_689815	GTAG
TR31458|c0_g7_i2	NODE_14229_length_1550_cov_8.00703_ID_690049	CTAC
TR7038|c0_g1_i2	NODE_14230_length_1550_cov_4.16725_ID_690075	CTAT
TR7038|c0_g1_i2	NODE_14230_length_1550_cov_4.16725_ID_690075	TTAC
TR21234|c0_g1_i1	NODE_14233_length_1549_cov_1.95992_ID_690179	GTAG
TR21234|c0_g1_i1	NODE_14233_length_1549_cov_1.95992_ID_690179	GTAG
TR17575|c0_g1_i1	NODE_14242_length_1548_cov_5.88045_ID_690493	CTAC
TR17575|c0_g1_i1	NODE_14242_length_1548_cov_5.88045_ID_690493	CTAC
TR6960|c0_g1_i2	NODE_1425_length_3166_cov_6.66371_ID_355657	GTAG
TR27119|c0_g1_i1	NODE_14256_length_1548_cov_1.42787_ID_690883	CTAC
TR28394|c1_g1_i1	NODE_14262_length_1548_cov_3.97255_ID_691039	GTAG
TR9573|c0_g3_i1	NODE_14275_length_1547_cov_7.20986_ID_691483	CTAC
TR28741|c0_g1_i1	NODE_14277_length_1547_cov_1.48239_ID_691535	GTAG
TR50256|c0_g1_i1	NODE_14292_length_1546_cov_3.11487_ID_691951	GTAG
TR25034|c1_g1_i1	NODE_14297_length_1546_cov_5.91614_ID_692081	GTAG
TR208|c2_g8_i1	NODE_14299_length_1548_cov_4.4334_ID_2266510	CTAC
TR208|c2_g8_i1	NODE_14299_length_1548_cov_4.4334_ID_2266510	CTAC
TR208|c2_g8_i1	NODE_14299_length_1548_cov_4.4334_ID_2266510	CTAC
TR208|c2_g8_i1	NODE_14299_length_1548_cov_4.4334_ID_2266510	CTAC
TR7161|c0_g1_i1	NODE_14299_length_1548_cov_4.4334_ID_2266510	CTAC
TR31253|c0_g2_i5	NODE_143_length_5072_cov_7.10815_ID_411799	GCAG
TR31253|c0_g2_i5	NODE_143_length_5072_cov_7.10815_ID_411799	GCAG
TR31253|c0_g2_i5	NODE_143_length_5072_cov_7.10815_ID_411799	GCAG
TR31253|c0_g2_i5	NODE_143_length_5072_cov_7.10815_ID_411799	GCAG
TR31253|c0_g2_i5	NODE_143_length_5072_cov_7.10815_ID_411799	GTAG
TR31253|c0_g2_i5	NODE_143_length_5072_cov_7.10815_ID_411799	GTAG
TR31253|c0_g2_i5	NODE_143_length_5072_cov_7.10815_ID_411799	GTAG
TR31253|c0_g2_i5	NODE_143_length_5072_cov_7.10815_ID_411799	GTAG
TR31253|c0_g2_i5	NODE_143_length_5072_cov_7.10815_ID_411799	GTAG
TR31253|c0_g2_i5	NODE_143_length_5072_cov_7.10815_ID_411799	GTAG
TR31253|c0_g2_i5	NODE_143_length_5072_cov_7.10815_ID_411799	GTAG
TR31253|c0_g2_i5	NODE_143_length_5072_cov_7.10815_ID_411799	GTAG
TR48378|c0_g1_i1	NODE_143_length_5072_cov_7.10815_ID_411799	GTAG
TR48378|c0_g1_i1	NODE_143_length_5072_cov_7.10815_ID_411799	GTAG
TR25613|c0_g1_i2	NODE_1431_length_3165_cov_5.33399_ID_416199	GTAG
TR25613|c0_g1_i2	NODE_1431_length_3165_cov_5.33399_ID_416199	GTAG
TR25613|c0_g1_i2	NODE_1431_length_3165_cov_5.33399_ID_416199	GTAG
TR25613|c0_g1_i2	NODE_1431_length_3165_cov_5.33399_ID_416199	GTAG
TR21813|c0_g1_i2	NODE_14315_length_1545_cov_13.8315_ID_692497	GTGC
TR21813|c0_g1_i2	NODE_14315_length_1545_cov_13.8315_ID_692497	TTAG
TR48538|c0_g7_i7	NODE_14318_length_1545_cov_3.58815_ID_692627	CTAC
TR48538|c0_g7_i7	NODE_14318_length_1545_cov_3.58815_ID_692627	CTAC
TR48538|c0_g7_i7	NODE_14318_length_1545_cov_3.58815_ID_692627	CTAC
TR48538|c0_g7_i7	NODE_14318_length_1545_cov_3.58815_ID_692627	CTAC
TR48538|c0_g7_i7	NODE_14318_length_1545_cov_3.58815_ID_692627	CTAC
TR3802|c0_g1_i1	NODE_14318_length_1545_cov_3.58815_ID_692627	CTAC
TR53992|c0_g1_i2	NODE_1432_length_3166_cov_8.07601_ID_355761	GTAG
TR52669|c0_g1_i1	NODE_14328_length_1544_cov_1.39944_ID_692861	GTAG
TR31454|c0_g2_i1	NODE_14331_length_1542_cov_0.452364_ID_692939	GTAG
TR31454|c0_g2_i1	NODE_14331_length_1542_cov_0.452364_ID_692939	GTAG
TR31454|c0_g2_i1	NODE_14331_length_1542_cov_0.452364_ID_692939	GTAG
TR7997|c0_g1_i1	NODE_14332_length_1544_cov_4.86309_ID_692965	GTAG
TR7997|c0_g1_i1	NODE_14332_length_1544_cov_4.86309_ID_692965	GTAG
TR16320|c0_g1_i1	NODE_14337_length_1544_cov_2.34721_ID_693095	CACA
TR45739|c0_g1_i1	NODE_1435_length_3165_cov_3.37656_ID_355839	GTAG
TR45739|c0_g1_i1	NODE_1435_length_3165_cov_3.37656_ID_355839	GTAG
TR45739|c0_g1_i1	NODE_1435_length_3165_cov_3.37656_ID_355839	GTAG
TR12162|c0_g1_i1	NODE_1435_length_3165_cov_3.37656_ID_355839	GTAG
TR44399|c0_g15_i1	NODE_14350_length_1543_cov_0.785311_ID_693381	CTAC
TR30481|c0_g1_i1	NODE_14356_length_1543_cov_3.4089_ID_693563	GTAG
TR15182|c0_g4_i1	NODE_14399_length_1546_cov_8.13498_ID_732549	CTAC
TR3437|c0_g1_i1	NODE_14405_length_1544_cov_2.28127_ID_694863	GTAG
TR32965|c1_g1_i1	NODE_14407_length_1541_cov_7.97739_ID_1376894	GTAG
TR32965|c1_g1_i1	NODE_14407_length_1541_cov_7.97739_ID_1376894	GTAG
TR30775|c3_g2_i3	NODE_14407_length_1541_cov_7.97739_ID_1376894	CTAC
TR30775|c3_g2_i3	NODE_14407_length_1541_cov_7.97739_ID_1376894	CTAC
TR30775|c3_g2_i3	NODE_14407_length_1541_cov_7.97739_ID_1376894	CTAC
TR30775|c3_g2_i3	NODE_14407_length_1541_cov_7.97739_ID_1376894	CTAC
TR30775|c3_g2_i3	NODE_14407_length_1541_cov_7.97739_ID_1376894	CTAC
TR30775|c3_g2_i3	NODE_14407_length_1541_cov_7.97739_ID_1376894	CTAC
TR21634|c0_g1_i1	NODE_1441_length_3163_cov_6.48469_ID_355995	CTAC
TR21634|c0_g1_i1	NODE_1441_length_3163_cov_6.48469_ID_355995	CTAC
TR21634|c0_g1_i1	NODE_1441_length_3163_cov_6.48469_ID_355995	CTAC
TR21634|c0_g1_i1	NODE_1441_length_3163_cov_6.48469_ID_355995	CTAC
TR21634|c0_g1_i1	NODE_1441_length_3163_cov_6.48469_ID_355995	CTAC
TR40677|c0_g1_i1	NODE_14426_length_1541_cov_5.99151_ID_695513	GTAG
TR47588|c0_g1_i2	NODE_1443_length_3163_cov_1.87319_ID_356047	GTAG
TR47588|c0_g1_i2	NODE_1443_length_3163_cov_1.87319_ID_356047	GTAG
TR47588|c0_g1_i2	NODE_1443_length_3163_cov_1.87319_ID_356047	GTAG
TR47588|c0_g1_i2	NODE_1443_length_3163_cov_1.87319_ID_356047	GTAG
TR21712|c0_g1_i1	NODE_14446_length_1540_cov_6.954_ID_696033	GTAG
TR21712|c0_g1_i1	NODE_14446_length_1540_cov_6.954_ID_696033	GTAG
TR21712|c0_g1_i1	NODE_14446_length_1540_cov_6.954_ID_696033	GTAG
TR36174|c0_g1_i1	NODE_14448_length_1541_cov_2.49752_ID_696085	CTAC
TR53328|c0_g1_i1	NODE_14463_length_1539_cov_4.80878_ID_696449	CTAC
TR53328|c0_g1_i1	NODE_14463_length_1539_cov_4.80878_ID_696449	CTAC
TR53328|c0_g1_i1	NODE_14463_length_1539_cov_4.80878_ID_696449	CTAC
TR11301|c0_g1_i2	NODE_14470_length_1538_cov_10.7408_ID_696633	CTAC
TR737|c0_g1_i1	NODE_14477_length_1536_cov_6.6034_ID_696815	GTAG
TR10609|c0_g1_i1	NODE_1448_length_3162_cov_10.9506_ID_446556	GTAG
TR23559|c0_g1_i1	NODE_14488_length_1537_cov_6.47697_ID_697235	CTCC
TR28394|c1_g1_i1	NODE_14491_length_1537_cov_11.2558_ID_697313	CTAC
TR23713|c0_g1_i1	NODE_14492_length_1538_cov_3.91425_ID_697339	GAAG
TR40291|c0_g2_i1	NODE_14502_length_1537_cov_5.93267_ID_697599	CTAC
TR40291|c0_g2_i1	NODE_14502_length_1537_cov_5.93267_ID_697599	CTAC
TR40291|c0_g2_i1	NODE_14502_length_1537_cov_5.93267_ID_697599	CTAC
TR40291|c0_g2_i1	NODE_14502_length_1537_cov_5.93267_ID_697599	CTAC
TR48045|c0_g1_i1	NODE_1454_length_3160_cov_3.12034_ID_356229	GTAG
TR48045|c0_g1_i1	NODE_1454_length_3160_cov_3.12034_ID_356229	GTAG
TR48045|c0_g1_i1	NODE_1454_length_3160_cov_3.12034_ID_356229	GTAG
TR23963|c0_g6_i1	NODE_14553_length_1535_cov_2.25852_ID_698925	CTAC
TR23963|c0_g6_i1	NODE_14553_length_1535_cov_2.25852_ID_698925	CTAC
TR23963|c0_g6_i1	NODE_14553_length_1535_cov_2.25852_ID_698925	CTAC
TR25347|c0_g1_i1	NODE_14556_length_1535_cov_6.34872_ID_699003	GTAG
TR31454|c0_g2_i1	NODE_14558_length_1535_cov_4.55682_ID_699055	CTAC
TR4015|c0_g2_i1	NODE_14561_length_1535_cov_4.76918_ID_699159	GTAG
TR17352|c0_g1_i2	NODE_14568_length_1535_cov_3.7294_ID_699315	CTAC
TR51628|c0_g2_i2	NODE_1457_length_3159_cov_5.12698_ID_2479808	GTAG
TR40389|c0_g1_i1	NODE_14570_length_1534_cov_1.05615_ID_699367	CTAC
TR40389|c0_g1_i1	NODE_14580_length_1534_cov_4.65601_ID_699627	GTAG
TR40389|c0_g1_i1	NODE_14580_length_1534_cov_4.65601_ID_699627	GTAG
TR15028|c0_g1_i1	NODE_14582_length_1534_cov_8.8209_ID_699653	CAAG
TR39585|c0_g1_i1	NODE_14596_length_1534_cov_2.22957_ID_699991	GTAG
TR39585|c0_g1_i1	NODE_14596_length_1534_cov_2.22957_ID_699991	GTAG
TR39585|c0_g1_i1	NODE_14596_length_1534_cov_2.22957_ID_699991	GTAG
TR39585|c0_g1_i1	NODE_14596_length_1534_cov_2.22957_ID_699991	GTAG
TR39585|c0_g1_i1	NODE_14596_length_1534_cov_2.22957_ID_699991	GTAG
TR39585|c0_g1_i1	NODE_14596_length_1534_cov_2.22957_ID_699991	GTAG
TR30821|c2_g4_i3	NODE_14599_length_1525_cov_4.77312_ID_840246	CTAC
TR30821|c2_g4_i3	NODE_14599_length_1525_cov_4.77312_ID_840246	CTAC
TR30821|c2_g4_i3	NODE_14599_length_1525_cov_4.77312_ID_840246	CTAC
TR30821|c2_g4_i3	NODE_14599_length_1525_cov_4.77312_ID_840246	CTAC
TR30821|c2_g4_i3	NODE_14599_length_1525_cov_4.77312_ID_840246	CTAC
TR30821|c2_g4_i3	NODE_14599_length_1525_cov_4.77312_ID_840246	CTAC
TR30821|c2_g4_i3	NODE_14599_length_1525_cov_4.77312_ID_840246	CTAC
TR10673|c0_g1_i1	NODE_146_length_5060_cov_4.16795_ID_386808	CTAC
TR12078|c4_g14_i1	NODE_14604_length_1533_cov_0.814367_ID_700173	CGAT
TR51928|c0_g1_i1	NODE_1461_length_3158_cov_8.93006_ID_356385	GCAG
TR51928|c0_g1_i1	NODE_1461_length_3158_cov_8.93006_ID_356385	GTAG
TR45940|c0_g1_i1	NODE_14636_length_1531_cov_2.121_ID_701031	GCAG
TR45940|c0_g1_i1	NODE_14636_length_1531_cov_2.121_ID_701031	GCAG
TR11579|c0_g1_i4	NODE_14637_length_1532_cov_3.83986_ID_701057	CTAC
TR27576|c0_g1_i1	NODE_14646_length_1532_cov_6.33594_ID_701291	CTAC
TR27576|c0_g1_i1	NODE_14646_length_1532_cov_6.33594_ID_701291	CTAC
TR30481|c0_g1_i1	NODE_14658_length_1531_cov_1.22578_ID_701655	GTAG
TR45681|c0_g1_i1	NODE_14664_length_1531_cov_4.0812_ID_701811	CTAC
TR45681|c0_g1_i1	NODE_14664_length_1531_cov_4.0812_ID_701811	CTAC
TR25613|c0_g1_i3	NODE_14666_length_1531_cov_2.82051_ID_701863	CTTG
TR25613|c0_g1_i1	NODE_14666_length_1531_cov_2.82051_ID_701863	CTTC
TR25613|c0_g1_i2	NODE_14666_length_1531_cov_2.82051_ID_701863	GCAT
TR26795|c0_g1_i1	NODE_14668_length_1531_cov_4.83974_ID_701915	CTAC
TR11020|c7_g8_i9	NODE_14671_length_1527_cov_8.90741_ID_701993	GTAC
TR22482|c0_g1_i1	NODE_14674_length_1530_cov_3.11475_ID_702071	CTAC
TR22482|c0_g1_i1	NODE_14674_length_1530_cov_3.11475_ID_702071	CTAC
TR22482|c0_g1_i1	NODE_14674_length_1530_cov_3.11475_ID_702071	CTGC
TR5186|c0_g1_i1	NODE_1468_length_3156_cov_4.0208_ID_356567	GTAG
TR48013|c0_g1_i1	NODE_14691_length_1530_cov_1.97363_ID_702461	GTAG
TR7201|c0_g1_i2	NODE_14699_length_1530_cov_4.47969_ID_702695	GTAG
TR7201|c0_g1_i2	NODE_14699_length_1530_cov_4.47969_ID_702695	GTAG
TR7201|c0_g1_i2	NODE_14699_length_1530_cov_4.47969_ID_702695	GTAG
TR7201|c0_g1_i2	NODE_14699_length_1530_cov_4.47969_ID_702695	GTAG
TR24030|c1_g3_i5	NODE_14700_length_1528_cov_7.48539_ID_702721	GTAG
TR24030|c1_g3_i5	NODE_14700_length_1528_cov_7.48539_ID_702721	GTAG
TR24030|c1_g3_i5	NODE_14700_length_1528_cov_7.48539_ID_702721	GTAG
TR24030|c1_g3_i5	NODE_14700_length_1528_cov_7.48539_ID_702721	GTAG
TR24030|c1_g3_i5	NODE_14700_length_1528_cov_7.48539_ID_702721	GTAG
TR24030|c1_g3_i5	NODE_14700_length_1528_cov_7.48539_ID_702721	GTAG
TR7523|c4_g2_i2	NODE_1471_length_3154_cov_4.29171_ID_658866	CTAC
TR48538|c0_g3_i1	NODE_14719_length_1528_cov_9.6883_ID_703163	GTAG
TR52046|c0_g1_i2	NODE_14721_length_1527_cov_1.29315_ID_703215	GTAG
TR10609|c0_g1_i1	NODE_14727_length_1528_cov_0.710207_ID_703397	GTAG
TR15519|c0_g1_i1	NODE_1473_length_3153_cov_2.1616_ID_356671	CTAC
TR15519|c0_g1_i1	NODE_1473_length_3153_cov_2.1616_ID_356671	CTAC
TR15519|c0_g1_i1	NODE_1473_length_3153_cov_2.1616_ID_356671	CTAC
TR15519|c0_g1_i1	NODE_1473_length_3153_cov_2.1616_ID_356671	CTAC
TR15519|c0_g1_i1	NODE_1473_length_3153_cov_2.1616_ID_356671	CTAC
TR15519|c0_g1_i1	NODE_1473_length_3153_cov_2.1616_ID_356671	CTAC
TR1243|c0_g1_i1	NODE_14733_length_1530_cov_1.61742_ID_703553	CTAC
TR27892|c0_g1_i1	NODE_1475_length_3152_cov_2.44165_ID_356749	CTAC
TR27892|c0_g1_i1	NODE_1475_length_3152_cov_2.44165_ID_356749	CTAC
TR27892|c0_g1_i1	NODE_1475_length_3152_cov_2.44165_ID_356749	CTAC
TR27892|c0_g1_i1	NODE_1475_length_3152_cov_2.44165_ID_356749	CTGC
TR3802|c0_g1_i1	NODE_14780_length_1526_cov_3.72623_ID_704671	GTAG
TR24817|c3_g9_i1	NODE_14786_length_1526_cov_6.28806_ID_704909	GCAG
TR24817|c3_g9_i1	NODE_14786_length_1526_cov_6.28806_ID_704909	GCAG
TR24817|c3_g9_i1	NODE_14786_length_1526_cov_6.28806_ID_704909	GCAG
TR24817|c3_g9_i1	NODE_14786_length_1526_cov_6.28806_ID_704909	GCAG
TR24817|c3_g9_i1	NODE_14786_length_1526_cov_6.28806_ID_704909	GCAG
TR24817|c3_g9_i1	NODE_14786_length_1526_cov_6.28806_ID_704909	GCAG
TR24817|c3_g9_i1	NODE_14786_length_1526_cov_6.28806_ID_704909	GTAG
TR24817|c3_g9_i1	NODE_14786_length_1526_cov_6.28806_ID_704909	GTAG
TR24817|c3_g9_i1	NODE_14786_length_1526_cov_6.28806_ID_704909	GTAG
TR24817|c3_g9_i1	NODE_14786_length_1526_cov_6.28806_ID_704909	GTAG
TR24817|c3_g9_i1	NODE_14786_length_1526_cov_6.28806_ID_704909	GTAG
TR23970|c0_g4_i2	NODE_14786_length_1526_cov_6.28806_ID_704909	GTAG
TR23970|c0_g1_i5	NODE_14786_length_1526_cov_6.28806_ID_704909	GTAG
TR23970|c0_g1_i5	NODE_14786_length_1526_cov_6.28806_ID_704909	GTAG
TR39844|c0_g1_i1	NODE_1479_length_3151_cov_4.87864_ID_356853	CTAC
TR39844|c0_g1_i1	NODE_1479_length_3151_cov_4.87864_ID_356853	CTAC
TR7251|c0_g1_i2	NODE_14798_length_1525_cov_5.26395_ID_2799697	CTAC
TR7251|c0_g1_i2	NODE_14798_length_1525_cov_5.26395_ID_2799697	CTAC
TR4797|c0_g1_i1	NODE_14806_length_1525_cov_3.45136_ID_705429	GTAG
TR7251|c0_g1_i2	NODE_14807_length_1525_cov_4.32046_ID_705455	CTAC
TR28154|c1_g2_i5	NODE_14822_length_1524_cov_2.16106_ID_705845	CTAC
TR7770|c0_g3_i2	NODE_14828_length_1524_cov_23.4152_ID_1419569	GTAG
TR31454|c0_g2_i1	NODE_1483_length_3148_cov_7.43944_ID_356905	GTAG
TR31454|c0_g2_i1	NODE_1483_length_3148_cov_7.43944_ID_356905	GTAG
TR10673|c0_g1_i1	NODE_14841_length_1524_cov_12.5505_ID_706261	CTTC
TR29471|c0_g1_i1	NODE_14848_length_1523_cov_1.87894_ID_706525	GTAG
TR16715|c0_g1_i2	NODE_14866_length_1522_cov_1.97063_ID_706941	GTAG
TR29932|c0_g2_i1	NODE_14875_length_1522_cov_4.15842_ID_707175	CTAC
TR29932|c0_g2_i1	NODE_14875_length_1522_cov_4.15842_ID_707175	CTAC
TR33383|c0_g1_i2	NODE_14889_length_1522_cov_10.0258_ID_707591	CTAC
TR33383|c0_g1_i2	NODE_14889_length_1522_cov_10.0258_ID_707591	CTAC
TR48344|c0_g1_i1	NODE_14893_length_1522_cov_1.95197_ID_707747	CTAC
TR48344|c0_g1_i1	NODE_14893_length_1522_cov_1.95197_ID_707747	CTAC
TR18856|c0_g2_i1	NODE_14898_length_1521_cov_2.07102_ID_707851	CTAC
TR13967|c0_g1_i1	NODE_149_length_5039_cov_5.33103_ID_416303	GTAG
TR13967|c0_g1_i1	NODE_149_length_5039_cov_5.33103_ID_416303	GTAG
TR13967|c0_g1_i1	NODE_149_length_5039_cov_5.33103_ID_416303	GTAG
TR13967|c0_g1_i1	NODE_149_length_5039_cov_5.33103_ID_416303	GTAG
TR13967|c0_g1_i1	NODE_149_length_5039_cov_5.33103_ID_416303	GTAG
TR13967|c0_g1_i1	NODE_149_length_5039_cov_5.33103_ID_416303	GTAG
TR13967|c0_g1_i1	NODE_149_length_5039_cov_5.33103_ID_416303	GTAG
TR13967|c0_g1_i1	NODE_149_length_5039_cov_5.33103_ID_416303	GTAG
TR13967|c0_g1_i1	NODE_149_length_5039_cov_5.33103_ID_416303	GTAG
TR13967|c0_g1_i1	NODE_149_length_5039_cov_5.33103_ID_416303	GTAG
TR13967|c0_g1_i1	NODE_149_length_5039_cov_5.33103_ID_416303	GTAG
TR13967|c0_g1_i1	NODE_149_length_5039_cov_5.33103_ID_416303	GTAG
TR13967|c0_g1_i1	NODE_149_length_5039_cov_5.33103_ID_416303	GTAG
TR13967|c0_g1_i1	NODE_149_length_5039_cov_5.33103_ID_416303	GTAG
TR13967|c0_g1_i1	NODE_149_length_5039_cov_5.33103_ID_416303	GTAG
TR13967|c0_g1_i1	NODE_149_length_5039_cov_5.33103_ID_416303	GTAG
TR13967|c0_g1_i1	NODE_149_length_5039_cov_5.33103_ID_416303	GTAG
TR13967|c0_g1_i1	NODE_149_length_5039_cov_5.33103_ID_416303	GTAG
TR6960|c0_g1_i2	NODE_1491_length_3144_cov_3.05036_ID_357009	CTAC
TR6960|c0_g1_i2	NODE_1491_length_3144_cov_3.05036_ID_357009	CTAC
TR6960|c0_g1_i2	NODE_1491_length_3144_cov_3.05036_ID_357009	CTAC
TR6960|c0_g1_i2	NODE_1491_length_3144_cov_3.05036_ID_357009	CTAC
TR15182|c0_g4_i1	NODE_14912_length_1521_cov_4.54448_ID_708241	CTAC
TR15182|c0_g4_i1	NODE_14912_length_1521_cov_4.54448_ID_708241	CTAC
TR12162|c0_g1_i1	NODE_14920_length_1521_cov_2.64275_ID_708501	CTAC
TR30775|c3_g2_i3	NODE_14921_length_1521_cov_1.91822_ID_708527	CTAC
TR9991|c0_g1_i1	NODE_14923_length_1521_cov_5.60976_ID_708579	GTCG
TR15123|c1_g4_i2	NODE_1493_length_3144_cov_4.19065_ID_552656	GTAG
TR15123|c1_g4_i2	NODE_1493_length_3144_cov_4.19065_ID_552656	GTAG
TR42154|c0_g1_i1	NODE_1493_length_3144_cov_4.19065_ID_552656	CTAC
TR42154|c0_g1_i1	NODE_1493_length_3144_cov_4.19065_ID_552656	CTAC
TR42154|c0_g1_i1	NODE_1493_length_3144_cov_4.19065_ID_552656	CTAC
TR29248|c0_g1_i3	NODE_14933_length_1520_cov_4.92032_ID_708839	CGCC
TR569|c0_g5_i2	NODE_14933_length_1520_cov_4.92032_ID_708839	CTAC
TR43608|c0_g1_i1	NODE_14941_length_1520_cov_3.83704_ID_709073	CTAC
TR819|c3_g6_i4	NODE_14952_length_1520_cov_1.27495_ID_709385	GTAG
TR819|c3_g6_i4	NODE_14952_length_1520_cov_1.27495_ID_709385	GTAG
TR45940|c0_g1_i1	NODE_14965_length_1519_cov_5.42888_ID_709749	CTAC
TR21712|c0_g1_i1	NODE_14978_length_1519_cov_21.2608_ID_710087	GCAG
TR47588|c0_g1_i2	NODE_14989_length_1518_cov_3.21208_ID_710373	GTAG
TR12277|c0_g2_i1	NODE_14998_length_1517_cov_5.61538_ID_710607	CTAC
TR12277|c0_g2_i1	NODE_14998_length_1517_cov_5.61538_ID_710607	CTAC
TR11034|c1_g17_i1	NODE_15_length_6804_cov_6.14527_ID_328109	CTAC
TR569|c0_g5_i2	NODE_150_length_5028_cov_4.78535_ID_329935	CTAC
TR569|c0_g5_i2	NODE_150_length_5028_cov_4.78535_ID_329935	CTAC
TR8239|c0_g1_i1	NODE_15004_length_1518_cov_7.65924_ID_710815	CTAC
TR11294|c0_g1_i1	NODE_15018_length_1517_cov_1.79856_ID_711181	GTAG
TR27309|c0_g1_i1	NODE_1503_length_3137_cov_4.79169_ID_357243	GTAG
TR19101|c0_g1_i1	NODE_1503_length_3137_cov_4.79169_ID_357243	GTAG
TR19101|c0_g1_i1	NODE_1503_length_3137_cov_4.79169_ID_357243	CTAC
TR32180|c3_g6_i2	NODE_15037_length_1516_cov_3.04248_ID_711701	GCAG
TR6979|c0_g1_i2	NODE_15048_length_1515_cov_3.09798_ID_711935	CTAC
TR6979|c0_g1_i2	NODE_15048_length_1515_cov_3.09798_ID_711935	CTAC
TR51628|c0_g2_i2	NODE_15049_length_1515_cov_1.79755_ID_711961	CTAC
TR51628|c0_g2_i2	NODE_15049_length_1515_cov_1.79755_ID_711961	CTAC
TR42907|c0_g1_i5	NODE_1505_length_3134_cov_4.84452_ID_357295	GCAG
TR42907|c0_g1_i5	NODE_1505_length_3134_cov_4.84452_ID_357295	GTAG
TR13893|c0_g1_i1	NODE_15056_length_1515_cov_6.43372_ID_712143	GTAG
TR13893|c0_g1_i1	NODE_15056_length_1515_cov_6.43372_ID_712143	GTAG
TR2973|c1_g2_i3	NODE_15058_length_1515_cov_5.63112_ID_712195	ATAC
TR2639|c0_g1_i1	NODE_15061_length_1506_cov_6.67291_ID_712273	CTAC
TR50465|c0_g1_i1	NODE_1507_length_3136_cov_2.37488_ID_357321	GTAG
TR2764|c0_g1_i1	NODE_15073_length_1514_cov_4.62293_ID_712585	GTAG
TR45940|c0_g1_i1	NODE_15076_length_1514_cov_4.66474_ID_712663	GTAG
TR45940|c0_g1_i1	NODE_15076_length_1514_cov_4.66474_ID_712663	GTAG
TR45940|c0_g1_i1	NODE_15076_length_1514_cov_4.66474_ID_712663	GTAG
TR42713|c0_g3_i1	NODE_15077_length_1513_cov_7.22639_ID_712689	CTAC
TR42713|c0_g3_i1	NODE_15077_length_1513_cov_7.22639_ID_712689	CTAC
TR15936|c0_g1_i1	NODE_15083_length_1514_cov_4.00433_ID_712845	CTAC
TR1177|c0_g1_i7	NODE_15087_length_1514_cov_2.49171_ID_712949	GTAG
TR1177|c0_g1_i7	NODE_15087_length_1514_cov_2.49171_ID_712949	GTAG
TR12772|c0_g2_i1	NODE_15089_length_1514_cov_4.06128_ID_713001	CTAC
TR12772|c0_g2_i1	NODE_15089_length_1514_cov_4.06128_ID_713001	CTAC
TR12772|c0_g2_i1	NODE_15089_length_1514_cov_4.06128_ID_713001	CTAC
TR12772|c0_g2_i1	NODE_15089_length_1514_cov_4.06128_ID_713001	CTAC
TR50465|c0_g1_i1	NODE_15090_length_1514_cov_7.55155_ID_713027	CTAC
TR32180|c3_g6_i2	NODE_15093_length_1514_cov_2.54146_ID_713105	CTAC
TR32180|c3_g6_i2	NODE_15093_length_1514_cov_2.54146_ID_713105	CTAC
TR32180|c3_g6_i2	NODE_15093_length_1514_cov_2.54146_ID_713105	CTAC
TR32180|c3_g6_i2	NODE_15093_length_1514_cov_2.54146_ID_713105	CTAC
TR32180|c3_g6_i2	NODE_15093_length_1514_cov_2.54146_ID_713105	CTAC
TR32180|c3_g6_i2	NODE_15093_length_1514_cov_2.54146_ID_713105	CTAC
TR11070|c0_g3_i1	NODE_15093_length_1514_cov_2.54146_ID_713105	CTAC
TR11070|c0_g3_i1	NODE_15093_length_1514_cov_2.54146_ID_713105	CTAC
TR48538|c0_g7_i7	NODE_15093_length_1514_cov_2.54146_ID_713105	CTAC
TR26795|c0_g1_i1	NODE_15118_length_1512_cov_3.68592_ID_713833	GTAG
TR26795|c0_g1_i1	NODE_15118_length_1512_cov_3.68592_ID_713833	GTAG
TR26795|c0_g1_i1	NODE_15118_length_1512_cov_3.68592_ID_713833	GTAG
TR6979|c0_g1_i2	NODE_1512_length_3130_cov_3.80047_ID_357425	CTAC
TR38015|c0_g1_i1	NODE_15123_length_1510_cov_1.30903_ID_713989	CTAC
TR50465|c0_g1_i1	NODE_15128_length_1512_cov_5.79928_ID_714171	CTGC
TR45940|c0_g1_i1	NODE_15130_length_1511_cov_6.56029_ID_714223	CTAC
TR16288|c0_g1_i6	NODE_15146_length_1511_cov_1.16835_ID_714639	CTAC
TR44739|c0_g2_i1	NODE_15148_length_1511_cov_2.20087_ID_714691	CTAC
TR44739|c0_g2_i1	NODE_15148_length_1511_cov_2.20087_ID_714691	CTAC
TR44739|c0_g2_i1	NODE_15148_length_1511_cov_2.20087_ID_714691	CTGC
TR41444|c0_g1_i1	NODE_1515_length_3133_cov_10.8556_ID_357503	GTAG
TR41444|c0_g1_i1	NODE_1515_length_3133_cov_10.8556_ID_357503	GTAG
TR40291|c0_g2_i1	NODE_15165_length_1511_cov_4.67991_ID_715107	CTAC
TR192|c0_g10_i1	NODE_1517_length_3130_cov_1.63016_ID_357555	GTAG
TR192|c0_g10_i1	NODE_1517_length_3130_cov_1.63016_ID_357555	GTAG
TR39666|c0_g1_i1	NODE_15177_length_1510_cov_6.05712_ID_715393	GTAG
TR17466|c0_g1_i1	NODE_15189_length_1510_cov_5.32899_ID_715705	CTAC
TR17466|c0_g1_i1	NODE_15189_length_1510_cov_5.32899_ID_715705	CTGC
TR36971|c0_g1_i1	NODE_15209_length_1509_cov_5.9631_ID_716251	GTAG
TR11496|c0_g1_i1	NODE_1521_length_3129_cov_2.19953_ID_357685	CAAG
TR34432|c0_g1_i1	NODE_15219_length_1509_cov_8.93054_ID_716485	CTAG
TR11232|c0_g1_i1	NODE_1522_length_3129_cov_2.97801_ID_357711	ACAG
TR28154|c1_g2_i5	NODE_15221_length_1509_cov_10.301_ID_716563	CTAC
TR12078|c4_g11_i1	NODE_15231_length_1508_cov_2.91383_ID_716797	GTCA
TR37262|c0_g1_i1	NODE_15241_length_1508_cov_4.71398_ID_717057	GTAG
TR37262|c0_g1_i1	NODE_15241_length_1508_cov_4.71398_ID_717057	GTAG
TR8984|c1_g1_i3	NODE_15256_length_1507_cov_7.05652_ID_2779357	GTAG
TR19868|c1_g1_i1	NODE_1527_length_3127_cov_5.795_ID_357893	CTAC
TR19868|c1_g1_i1	NODE_1527_length_3127_cov_5.795_ID_357893	CTAC
TR19868|c1_g1_i1	NODE_1527_length_3127_cov_5.795_ID_357893	CTAC
TR28517|c0_g1_i1	NODE_15271_length_1506_cov_7.99927_ID_717947	GTAG
TR28517|c0_g1_i1	NODE_15271_length_1506_cov_7.99927_ID_717947	GTAG
TR25813|c0_g2_i1	NODE_1528_length_3127_cov_5.64367_ID_357919	GTAG
TR25813|c0_g2_i1	NODE_1528_length_3127_cov_5.64367_ID_357919	GTAG
TR25813|c0_g2_i1	NODE_1528_length_3127_cov_5.64367_ID_357919	GTAG
TR25813|c0_g2_i1	NODE_1528_length_3127_cov_5.64367_ID_357919	GTAG
TR8210|c1_g1_i2	NODE_15281_length_1505_cov_5.64612_ID_718233	CTAC
TR12078|c4_g14_i1	NODE_15281_length_1505_cov_5.64612_ID_718233	CTGG
TR15450|c0_g1_i1	NODE_1529_length_3126_cov_2.54218_ID_357945	GCAG
TR36923|c0_g2_i1	NODE_1529_length_3126_cov_2.54218_ID_357945	CTAC
TR32995|c0_g1_i3	NODE_15303_length_1505_cov_11.6343_ID_2405932	CTAC
TR42|c0_g1_i1	NODE_1531_length_3126_cov_3.59006_ID_652308	CTAC
TR44739|c0_g2_i1	NODE_15314_length_1505_cov_2.12781_ID_719065	GTAG
TR40677|c0_g1_i1	NODE_15315_length_1504_cov_4.53595_ID_719143	CTAC
TR28527|c0_g1_i1	NODE_15329_length_1504_cov_3.97531_ID_719533	CTAC
TR28527|c0_g1_i1	NODE_15329_length_1504_cov_3.97531_ID_719533	CTAC
TR7251|c0_g1_i2	NODE_15336_length_1502_cov_11.1751_ID_719767	CTAC
TR42713|c0_g3_i1	NODE_15353_length_1503_cov_6.32122_ID_720209	GTAG
TR28741|c0_g1_i1	NODE_15358_length_1502_cov_2.85901_ID_720339	CTAC
TR28741|c0_g1_i1	NODE_15358_length_1502_cov_2.85901_ID_720339	CTAC
TR48381|c0_g1_i1	NODE_15359_length_1503_cov_5.2282_ID_720365	GTAG
TR17310|c0_g1_i1	NODE_1536_length_3123_cov_3.31776_ID_358049	CTAC
TR17310|c0_g1_i1	NODE_1536_length_3123_cov_3.31776_ID_358049	CTAC
TR10110|c0_g1_i2	NODE_1537_length_3122_cov_4.0187_ID_434268	CTAC
TR7770|c0_g3_i2	NODE_15378_length_1501_cov_7.70327_ID_720833	ATAA
TR7770|c0_g3_i2	NODE_15378_length_1501_cov_7.70327_ID_720833	CTAG
TR33762|c0_g1_i1	NODE_15379_length_1502_cov_3.74109_ID_720859	GTAG
TR33762|c0_g1_i1	NODE_15379_length_1502_cov_3.74109_ID_720859	GTAG
TR33762|c0_g1_i1	NODE_15379_length_1502_cov_3.74109_ID_720859	GTAG
TR33762|c0_g1_i1	NODE_15379_length_1502_cov_3.74109_ID_720859	GTAG
TR47186|c0_g1_i1	NODE_1538_length_3123_cov_3.78497_ID_358075	CTAC
TR7251|c0_g1_i2	NODE_15386_length_1500_cov_5.95564_ID_721041	GTAG
TR7251|c0_g1_i2	NODE_15386_length_1500_cov_5.95564_ID_721041	GTAG
TR2764|c0_g1_i1	NODE_15387_length_1501_cov_9.74964_ID_2629619	GTAG
TR2764|c0_g1_i1	NODE_15387_length_1501_cov_9.74964_ID_2629619	GTAG
TR49337|c0_g1_i1	NODE_1539_length_3122_cov_9.23506_ID_358101	CTAC
TR28741|c0_g1_i1	NODE_1540_length_3122_cov_3.98331_ID_358127	CTAC
TR28741|c0_g1_i1	NODE_1540_length_3122_cov_3.98331_ID_358127	CTAC
TR48381|c0_g1_i1	NODE_1541_length_3121_cov_4.10688_ID_358153	GTAG
TR48381|c0_g1_i1	NODE_1541_length_3121_cov_4.10688_ID_358153	GTAG
TR53992|c0_g1_i1	NODE_15415_length_1500_cov_2.7815_ID_721899	CAAA
TR53992|c0_g1_i2	NODE_15415_length_1500_cov_2.7815_ID_721899	CAAA
TR20059|c0_g1_i1	NODE_15420_length_1496_cov_17.4763_ID_836626	GTAG
TR20059|c0_g1_i1	NODE_15420_length_1496_cov_17.4763_ID_836626	GTGG
TR25059|c1_g3_i4	NODE_15422_length_1494_cov_2.81646_ID_722133	CTAC
TR487|c0_g1_i2	NODE_1543_length_3120_cov_4.69362_ID_358205	GTAG
TR14402|c0_g1_i1	NODE_1543_length_3120_cov_4.69362_ID_358205	CTAC
TR14402|c0_g1_i1	NODE_1543_length_3120_cov_4.69362_ID_358205	GTAG
TR24817|c3_g9_i1	NODE_15440_length_1499_cov_14.0401_ID_2409075	GTAG
TR24817|c3_g9_i1	NODE_15440_length_1499_cov_14.0401_ID_2409075	CTAC
TR24817|c3_g9_i1	NODE_15440_length_1499_cov_14.0401_ID_2409075	CTAC
TR12277|c0_g2_i1	NODE_15440_length_1499_cov_14.0401_ID_2409075	CTAC
TR39687|c0_g1_i1	NODE_15446_length_1499_cov_7.95773_ID_722863	AGTG
TR52452|c0_g1_i1	NODE_15449_length_1496_cov_1.95845_ID_722941	CTAC
TR52452|c0_g1_i1	NODE_15449_length_1496_cov_1.95845_ID_722941	CTGC
TR17466|c0_g1_i1	NODE_1545_length_3118_cov_4.06787_ID_358283	CTAC
TR23559|c0_g1_i1	NODE_15464_length_1498_cov_6.72867_ID_723305	GTAG
TR25649|c0_g1_i8	NODE_15487_length_1497_cov_2.54964_ID_723825	CTAC
TR23253|c1_g3_i2	NODE_1549_length_3113_cov_3.53748_ID_358387	CTAC
TR23253|c1_g3_i2	NODE_1549_length_3113_cov_3.53748_ID_358387	CTAC
TR23253|c1_g3_i2	NODE_1549_length_3113_cov_3.53748_ID_358387	CTAC
TR23253|c1_g3_i2	NODE_1549_length_3113_cov_3.53748_ID_358387	CTAC
TR30710|c0_g1_i3	NODE_15492_length_1498_cov_1.91022_ID_724007	GTAG
TR22482|c0_g1_i1	NODE_15495_length_1497_cov_0.90146_ID_724111	CTAC
TR22482|c0_g1_i1	NODE_15495_length_1497_cov_0.90146_ID_724111	CTAC
TR7251|c0_g1_i2	NODE_155_length_4989_cov_2.76214_ID_896749	GTAG
TR7251|c0_g1_i2	NODE_155_length_4989_cov_2.76214_ID_896749	GTAG
TR6474|c0_g1_i1	NODE_155_length_4989_cov_2.76214_ID_896749	GTAG
TR6474|c0_g1_i1	NODE_155_length_4989_cov_2.76214_ID_896749	GTAG
TR6474|c0_g1_i1	NODE_155_length_4989_cov_2.76214_ID_896749	GTAG
TR6474|c0_g1_i1	NODE_155_length_4989_cov_2.76214_ID_896749	GTAG
TR40389|c0_g1_i1	NODE_15502_length_1496_cov_3.84879_ID_920011	GTAG
TR40389|c0_g1_i1	NODE_15502_length_1496_cov_3.84879_ID_920011	GTAG
TR44011|c0_g1_i1	NODE_1551_length_3113_cov_5.49146_ID_358439	GTAG
TR44011|c0_g1_i1	NODE_1551_length_3113_cov_5.49146_ID_358439	GTAG
TR33501|c0_g2_i1	NODE_15516_length_1496_cov_6.7363_ID_724553	CTAC
TR33501|c0_g2_i1	NODE_15516_length_1496_cov_6.7363_ID_724553	CTAC
TR25821|c0_g1_i1	NODE_15520_length_1496_cov_4.01315_ID_724657	GATG
TR4506|c0_g1_i1	NODE_15524_length_1496_cov_2.3645_ID_724761	CTAC
TR4506|c0_g1_i1	NODE_15524_length_1496_cov_2.3645_ID_724761	CTAC
TR4506|c0_g1_i1	NODE_15524_length_1496_cov_2.3645_ID_724761	CTAC
TR4506|c0_g1_i1	NODE_15524_length_1496_cov_2.3645_ID_724761	CTAC
TR4506|c0_g1_i1	NODE_15524_length_1496_cov_2.3645_ID_724761	CTAC
TR4506|c0_g1_i1	NODE_15524_length_1496_cov_2.3645_ID_724761	CTAC
TR29248|c0_g1_i3	NODE_15549_length_1495_cov_2.21857_ID_725385	GTAG
TR16300|c0_g1_i1	NODE_15554_length_1495_cov_9.79386_ID_725515	CTAC
TR16300|c0_g1_i1	NODE_15554_length_1495_cov_9.79386_ID_725515	CTGC
TR30710|c0_g1_i3	NODE_1557_length_3111_cov_4.35054_ID_358595	GTAG
TR51174|c0_g1_i1	NODE_15576_length_1494_cov_3.47769_ID_726139	CTAC
TR8564|c0_g1_i1	NODE_1558_length_3110_cov_11.0764_ID_358621	CTAC
TR8564|c0_g1_i1	NODE_1558_length_3110_cov_11.0764_ID_358621	CTAC
[truncated: 9,419 more rows]

## Sheet: Table S3
Transcript ID	Genome contig ID	Intron boundaries (XX/YY)
TR14125|c0_g1_i1	NODE_100209_length_247_cov_11.15_ID_2545171	TTAC
TR20905|c0_g1_i2	NODE_10085_length_1769_cov_4.55238_ID_579233	CAAG
TR488|c0_g1_i1	NODE_10141_length_1765_cov_19.931_ID_580585	GTGC
TR94|c0_g1_i1	NODE_102_length_5362_cov_5.04107_ID_329207	CACG
TR26352|c0_g1_i2	NODE_10215_length_1761_cov_5.35618_ID_582641	ATCG
TR26352|c0_g1_i1	NODE_10215_length_1761_cov_5.35618_ID_582641	TTAA
TR25667|c0_g1_i1	NODE_10216_length_1761_cov_7.14259_ID_582667	CTTC
TR24019|c0_g1_i1	NODE_10230_length_1760_cov_8.85915_ID_583031	GACG
TR24019|c0_g12_i2	NODE_10230_length_1760_cov_8.85915_ID_583031	TTTC
TR24019|c0_g1_i1	NODE_10230_length_1760_cov_8.85915_ID_583031	TTTC
TR24019|c0_g1_i1	NODE_10230_length_1760_cov_8.85915_ID_583031	TTTC
TR24019|c0_g1_i1	NODE_10230_length_1760_cov_8.85915_ID_583031	TTTC
TR24019|c0_g5_i1	NODE_10230_length_1760_cov_8.85915_ID_583031	TTTC
TR24034|c1_g15_i1	NODE_10309_length_1755_cov_11.1192_ID_2437419	GGAG
TR24034|c1_g15_i1	NODE_10309_length_1755_cov_11.1192_ID_2437419	GGAG
TR24034|c1_g11_i3	NODE_10309_length_1755_cov_11.1192_ID_2437419	GGAG
TR24034|c1_g11_i3	NODE_10309_length_1755_cov_11.1192_ID_2437419	GGAG
TR24034|c1_g6_i1	NODE_10309_length_1755_cov_11.1192_ID_2437419	GGAG
TR24034|c1_g20_i1	NODE_10309_length_1755_cov_11.1192_ID_2437419	GGAG
TR30736|c4_g14_i5	NODE_10405_length_1749_cov_1.59186_ID_587667	CTTG
TR32877|c0_g1_i1	NODE_104082_length_224_cov_8.06186_ID_2593445	GTAA
TR50465|c0_g1_i1	NODE_105_length_5340_cov_12.8109_ID_2632112	GGAG
TR32877|c0_g1_i1	NODE_105_length_5340_cov_12.8109_ID_2632112	NNNN
TR28606|c0_g1_i1	NODE_10557_length_1740_cov_1.96838_ID_591626	GCCA
TR28606|c0_g1_i4	NODE_10557_length_1740_cov_1.96838_ID_591626	TCAG
TR1522|c0_g4_i1	NODE_10630_length_1736_cov_7.72281_ID_593712	CAAC
TR1522|c0_g4_i1	NODE_10630_length_1736_cov_7.72281_ID_593712	CAGC
TR48469|c0_g1_i1	NODE_10723_length_1731_cov_9.61783_ID_596250	CCAC
TR48469|c0_g1_i1	NODE_10723_length_1731_cov_9.61783_ID_596250	CCAC
TR25092|c3_g9_i9	NODE_10735_length_1730_cov_6.22271_ID_2413086	GTAC
TR612|c0_g1_i1	NODE_10763_length_1729_cov_2.46941_ID_597424	CATT
TR15935|c0_g1_i1	NODE_10802_length_1726_cov_5.69168_ID_598594	CAAC
TR23699|c0_g1_i2	NODE_10847_length_1721_cov_8.74076_ID_599794	CCAC
TR50429|c0_g2_i1	NODE_10986_length_1714_cov_255.271_ID_2727377	CAAA
TR50429|c0_g2_i1	NODE_10986_length_1714_cov_255.271_ID_2727377	CCAC
TR8210|c1_g1_i2	NODE_11025_length_1712_cov_6.54574_ID_1610537	GCGG
TR8210|c1_g1_i2	NODE_11025_length_1712_cov_6.54574_ID_1610537	GCGG
TR12078|c4_g10_i1	NODE_11025_length_1712_cov_6.54574_ID_1610537	TTAT
TR35182|c0_g1_i1	NODE_11057_length_1709_cov_4.19962_ID_605282	CCAG
TR253|c0_g1_i3	NODE_11196_length_1703_cov_3.23477_ID_609078	GAAG
TR8210|c1_g1_i2	NODE_11323_length_1697_cov_1.93631_ID_612278	GCGG
TR12078|c4_g11_i1	NODE_11323_length_1697_cov_1.93631_ID_612278	CAAC
TR13893|c0_g1_i1	NODE_11327_length_1696_cov_1.72084_ID_612382	CCAC
TR15816|c0_g1_i1	NODE_1138_length_3340_cov_5.3159_ID_349398	CTGG
TR15816|c0_g2_i1	NODE_1138_length_3340_cov_5.3159_ID_349398	GTCG
TR18856|c0_g2_i1	NODE_1138_length_3340_cov_5.3159_ID_349398	GTCG
TR19604|c0_g1_i1	NODE_11407_length_1692_cov_2.38147_ID_614549	CGAC
TR17605|c0_g1_i1	NODE_11443_length_1690_cov_7.25016_ID_615485	CCAC
TR30782|c5_g7_i1	NODE_11550_length_1683_cov_4.51928_ID_618293	CTTG
TR11066|c0_g8_i2	NODE_11681_length_1676_cov_3.52615_ID_621725	TTCG
TR11066|c0_g8_i3	NODE_11681_length_1676_cov_3.52615_ID_621725	TTGT
TR11066|c0_g8_i4	NODE_11681_length_1676_cov_3.52615_ID_621725	TTTC
TR11066|c0_g3_i1	NODE_11681_length_1676_cov_3.52615_ID_621725	TTTC
TR11066|c0_g7_i1	NODE_11681_length_1676_cov_3.52615_ID_621725	TTTC
TR9031|c0_g1_i1	NODE_11751_length_1672_cov_10.4712_ID_1501618	CGAA
TR34374|c0_g1_i1	NODE_11785_length_1671_cov_3.15554_ID_624537	GTGT
TR12048|c1_g2_i2	NODE_11817_length_1665_cov_1.61259_ID_625395	GTCG
TR45198|c0_g2_i1	NODE_11847_length_1667_cov_8.38182_ID_626307	GAAG
TR22945|c0_g2_i1	NODE_11856_length_1665_cov_5.48343_ID_1127434	GTGG
TR14189|c0_g1_i2	NODE_1191_length_3310_cov_2.51193_ID_350594	GAAG
TR11034|c1_g11_i1	NODE_11939_length_1663_cov_8.58203_ID_628831	CAAC
TR11034|c1_g17_i1	NODE_11939_length_1663_cov_8.58203_ID_628831	CAAC
TR11034|c1_g20_i1	NODE_11939_length_1663_cov_8.58203_ID_628831	CAAC
TR11034|c1_g17_i1	NODE_11939_length_1663_cov_8.58203_ID_628831	CAAC
TR11294|c0_g1_i1	NODE_11939_length_1663_cov_8.58203_ID_628831	GTAC
TR9476|c0_g2_i1	NODE_11972_length_1661_cov_6.90352_ID_629715	GAGG
TR33390|c0_g1_i1	NODE_12009_length_1658_cov_2.18877_ID_630762	ATCG
TR33390|c0_g1_i3	NODE_12009_length_1658_cov_2.18877_ID_630762	GTGC
TR33390|c0_g2_i1	NODE_12009_length_1658_cov_2.18877_ID_630762	GCGC
TR1514|c0_g2_i8	NODE_12011_length_1658_cov_8.45134_ID_630814	CCAA
TR1514|c0_g2_i8	NODE_12011_length_1658_cov_8.45134_ID_630814	CGAC
TR17352|c0_g1_i2	NODE_12034_length_1657_cov_11.9007_ID_631412	CAAG
TR24817|c3_g9_i1	NODE_12038_length_1656_cov_6.92484_ID_631516	CGAC
TR36922|c0_g1_i1	NODE_12131_length_1651_cov_2.85433_ID_633960	GTGG
TR47116|c0_g1_i1	NODE_12131_length_1651_cov_2.85433_ID_633960	CGAA
TR4015|c0_g2_i1	NODE_12168_length_1649_cov_8.95795_ID_634870	GATG
TR555|c0_g1_i1	NODE_12174_length_1648_cov_1.83049_ID_635026	CAAG
TR7773|c0_g7_i2	NODE_12230_length_1646_cov_7.50165_ID_2252120	GTAA
TR6894|c0_g1_i1	NODE_12253_length_1644_cov_1.84124_ID_636924	CCAC
TR50677|c0_g1_i1	NODE_12279_length_1642_cov_1.57388_ID_637600	ACTG
TR7451|c0_g8_i4	NODE_12313_length_1642_cov_5.5538_ID_638484	CTAA
TR579|c0_g1_i1	NODE_12368_length_1645_cov_3.28222_ID_639998	ACAC
TR4797|c0_g1_i1	NODE_12583_length_1628_cov_2.33489_ID_645822	CGGG
TR27892|c0_g1_i1	NODE_12603_length_1628_cov_4.25916_ID_646480	CTTG
TR6501|c0_g1_i1	NODE_12607_length_1628_cov_3.4044_ID_646584	GAAG
TR48134|c0_g4_i1	NODE_12662_length_1624_cov_1.0668_ID_648096	CAAA
TR48134|c0_g4_i1	NODE_12662_length_1624_cov_1.0668_ID_648096	CAAC
TR48134|c0_g4_i1	NODE_12662_length_1624_cov_1.0668_ID_648096	TGAA
TR48134|c0_g4_i1	NODE_12662_length_1624_cov_1.0668_ID_648096	TGAC
TR48134|c0_g4_i1	NODE_12662_length_1624_cov_1.0668_ID_648096	TGAC
TR48134|c0_g4_i1	NODE_12662_length_1624_cov_1.0668_ID_648096	TTAC
TR2639|c0_g1_i1	NODE_12695_length_1622_cov_2.50234_ID_649006	CGAC
TR47359|c1_g1_i1	NODE_12708_length_1622_cov_28.7605_ID_1198406	CTTG
TR25060|c0_g1_i2	NODE_12725_length_1621_cov_5.39424_ID_649890	AGAG
TR25060|c0_g1_i2	NODE_12725_length_1621_cov_5.39424_ID_649890	GAAC
TR25060|c0_g1_i2	NODE_12725_length_1621_cov_5.39424_ID_649890	GAAC
TR38678|c0_g9_i1	NODE_12803_length_1616_cov_3.31745_ID_651970	GAAG
TR38678|c0_g3_i1	NODE_12803_length_1616_cov_3.31745_ID_651970	GTTG
TR38678|c0_g3_i1	NODE_12803_length_1616_cov_3.31745_ID_651970	GTTG
TR38678|c0_g10_i1	NODE_12803_length_1616_cov_3.31745_ID_651970	ATAG
TR38678|c0_g5_i1	NODE_12803_length_1616_cov_3.31745_ID_651970	CGGT
TR38678|c0_g2_i1	NODE_12803_length_1616_cov_3.31745_ID_651970	CGAG
TR38678|c0_g6_i1	NODE_12803_length_1616_cov_3.31745_ID_651970	GGGC
TR38678|c0_g9_i1	NODE_12803_length_1616_cov_3.31745_ID_651970	GGGC
TR38678|c0_g14_i1	NODE_12803_length_1616_cov_3.31745_ID_651970	GTGC
TR38678|c0_g11_i2	NODE_12803_length_1616_cov_3.31745_ID_651970	GTGC
TR38678|c0_g11_i1	NODE_12803_length_1616_cov_3.31745_ID_651970	TGGC
TR38678|c0_g5_i1	NODE_12803_length_1616_cov_3.31745_ID_651970	TGGC
TR38678|c0_g6_i1	NODE_12803_length_1616_cov_3.31745_ID_651970	TTAT
TR53612|c0_g1_i2	NODE_12835_length_1616_cov_4.67495_ID_652698	CCAC
TR23559|c0_g1_i1	NODE_12853_length_1615_cov_3.86089_ID_2779926	GTAC
TR27355|c0_g1_i1	NODE_12869_length_1615_cov_6.32728_ID_653530	CTTG
TR39199|c0_g1_i1	NODE_1300_length_3248_cov_2.45242_ID_352979	GGTC
TR12078|c4_g11_i1	NODE_13071_length_1605_cov_4.47091_ID_658762	TTAC
TR47903|c0_g1_i4	NODE_13098_length_1604_cov_2.09953_ID_659412	CTTC
TR28891|c0_g2_i1	NODE_1310_length_3241_cov_7.54367_ID_761686	NNNN
TR11029|c4_g2_i9	NODE_1313_length_3236_cov_4.156_ID_353343	CAAC
TR9573|c0_g2_i1	NODE_13133_length_1601_cov_3.43419_ID_660244	TTAG
TR9573|c0_g3_i1	NODE_13133_length_1601_cov_3.43419_ID_660244	TTAG
TR12078|c4_g14_i1	NODE_13173_length_1599_cov_6.42498_ID_661370	CAAC
TR21816|c0_g1_i1	NODE_13237_length_1595_cov_1.57823_ID_663008	ATAT
TR40633|c1_g1_i1	NODE_13264_length_1596_cov_6.63036_ID_663710	TTTG
TR8296|c0_g1_i1	NODE_1327_length_3229_cov_14.6703_ID_632478	CAAA
TR10720|c0_g1_i1	NODE_13489_length_1586_cov_8.22961_ID_669628	TTAA
TR51928|c0_g1_i1	NODE_13585_length_1574_cov_7.67125_ID_672360	ATAG
TR1364|c0_g1_i1	NODE_13728_length_1573_cov_2.37414_ID_676277	GTAT
TR40419|c0_g1_i1	NODE_13738_length_1572_cov_3.27474_ID_676485	GTTC
TR19828|c0_g1_i1	NODE_1376_length_3200_cov_5.99349_ID_354669	CAAA
TR19828|c0_g1_i1	NODE_1376_length_3200_cov_5.99349_ID_354669	CTTT
TR30591|c0_g1_i1	NODE_13778_length_1570_cov_6.04366_ID_677735	ATAG
TR30591|c0_g1_i1	NODE_13778_length_1570_cov_6.04366_ID_677735	ATAG
TR30591|c0_g1_i1	NODE_13778_length_1570_cov_6.04366_ID_677735	ATAG
TR30591|c0_g1_i1	NODE_13778_length_1570_cov_6.04366_ID_677735	ATAG
TR17700|c0_g1_i1	NODE_13825_length_1567_cov_4.28194_ID_679035	ATAA
TR5058|c0_g1_i2	NODE_1388_length_3192_cov_3.77162_ID_388316	ATGG
TR5058|c0_g1_i1	NODE_1388_length_3192_cov_3.77162_ID_388316	TGAG
TR5058|c0_g1_i1	NODE_1388_length_3192_cov_3.77162_ID_388316	TGAG
TR23335|c0_g2_i2	NODE_13958_length_1562_cov_2.10174_ID_682519	ACCG
TR23335|c0_g2_i1	NODE_13958_length_1562_cov_2.10174_ID_682519	GTGC
TR23335|c0_g2_i1	NODE_13958_length_1562_cov_2.10174_ID_682519	GTGC
TR23335|c0_g2_i2	NODE_13958_length_1562_cov_2.10174_ID_682519	TTCG
TR51773|c0_g7_i1	NODE_14028_length_1558_cov_1.8764_ID_684443	CGAG
TR51773|c0_g1_i1	NODE_14028_length_1558_cov_1.8764_ID_684443	CGAG
TR51773|c0_g7_i1	NODE_14028_length_1558_cov_1.8764_ID_684443	CGAG
TR8210|c1_g1_i2	NODE_14063_length_1557_cov_10.1951_ID_1280055	GCGG
TR8210|c1_g1_i2	NODE_14063_length_1557_cov_10.1951_ID_1280055	GCGG
TR46143|c0_g2_i1	NODE_14180_length_1551_cov_2.69382_ID_688749	ATAG
TR46143|c0_g1_i1	NODE_14180_length_1551_cov_2.69382_ID_688749	ATAG
TR46143|c0_g5_i1	NODE_14180_length_1551_cov_2.69382_ID_688749	ATAG
TR46143|c0_g3_i1	NODE_14180_length_1551_cov_2.69382_ID_688749	GAAG
TR1166|c0_g2_i1	NODE_14205_length_1551_cov_6.10112_ID_689399	GAAG
TR1166|c0_g2_i1	NODE_14205_length_1551_cov_6.10112_ID_689399	CGAG
TR7038|c0_g1_i2	NODE_14230_length_1550_cov_4.16725_ID_690075	TTAC
TR21813|c0_g1_i2	NODE_14315_length_1545_cov_13.8315_ID_692497	GTGC
TR21813|c0_g1_i2	NODE_14315_length_1545_cov_13.8315_ID_692497	TTAG
TR16320|c0_g1_i1	NODE_14337_length_1544_cov_2.34721_ID_693095	CACA
TR23713|c0_g1_i1	NODE_14492_length_1538_cov_3.91425_ID_697339	GAAG
TR15028|c0_g1_i1	NODE_14582_length_1534_cov_8.8209_ID_699653	CAAG
TR12078|c4_g14_i1	NODE_14604_length_1533_cov_0.814367_ID_700173	CGAT
TR25613|c0_g1_i3	NODE_14666_length_1531_cov_2.82051_ID_701863	CTTG
TR25613|c0_g1_i1	NODE_14666_length_1531_cov_2.82051_ID_701863	CTTC
TR25613|c0_g1_i2	NODE_14666_length_1531_cov_2.82051_ID_701863	GCAT
TR11020|c7_g8_i9	NODE_14671_length_1527_cov_8.90741_ID_701993	GTAC
TR10673|c0_g1_i1	NODE_14841_length_1524_cov_12.5505_ID_706261	CTTC
TR9991|c0_g1_i1	NODE_14923_length_1521_cov_5.60976_ID_708579	GTCG
TR29248|c0_g1_i3	NODE_14933_length_1520_cov_4.92032_ID_708839	CGCC
TR2973|c1_g2_i3	NODE_15058_length_1515_cov_5.63112_ID_712195	ATAC
TR11496|c0_g1_i1	NODE_1521_length_3129_cov_2.19953_ID_357685	CAAG
TR11232|c0_g1_i1	NODE_1522_length_3129_cov_2.97801_ID_357711	ACAG
TR12078|c4_g11_i1	NODE_15231_length_1508_cov_2.91383_ID_716797	GTCA
TR12078|c4_g14_i1	NODE_15281_length_1505_cov_5.64612_ID_718233	CTGG
TR7770|c0_g3_i2	NODE_15378_length_1501_cov_7.70327_ID_720833	ATAA
TR53992|c0_g1_i1	NODE_15415_length_1500_cov_2.7815_ID_721899	CAAA
TR53992|c0_g1_i2	NODE_15415_length_1500_cov_2.7815_ID_721899	CAAA
TR20059|c0_g1_i1	NODE_15420_length_1496_cov_17.4763_ID_836626	GTGG
TR39687|c0_g1_i1	NODE_15446_length_1499_cov_7.95773_ID_722863	AGTG
TR25821|c0_g1_i1	NODE_15520_length_1496_cov_4.01315_ID_724657	GATG
TR27891|c0_g2_i1	NODE_15663_length_1490_cov_0.887014_ID_728363	GTCC
TR5888|c0_g2_i1	NODE_15689_length_1489_cov_2.07489_ID_729013	GAAG
TR5888|c0_g1_i1	NODE_15689_length_1489_cov_2.07489_ID_729013	GAAG
TR5531|c0_g1_i1	NODE_15703_length_1489_cov_13.9581_ID_729403	CAAC
TR22120|c0_g1_i2	NODE_15751_length_1487_cov_9.30809_ID_730729	CGAC
TR737|c0_g1_i1	NODE_15904_length_1480_cov_6.65928_ID_734999	GGAG
TR15200|c1_g2_i1	NODE_15935_length_1478_cov_3.2191_ID_735859	ACGC
TR15200|c1_g5_i1	NODE_15935_length_1478_cov_3.2191_ID_735859	ACGC
TR15200|c1_g2_i1	NODE_15935_length_1478_cov_3.2191_ID_735859	CACG
TR15200|c1_g16_i1	NODE_15935_length_1478_cov_3.2191_ID_735859	CGGC
TR15200|c1_g11_i1	NODE_15935_length_1478_cov_3.2191_ID_735859	CGGC
TR7201|c0_g1_i2	NODE_15980_length_1476_cov_0.807265_ID_737107	ATGC
TR30821|c2_g4_i3	NODE_16023_length_1475_cov_3.48591_ID_738407	CAAC
TR1166|c0_g2_i1	NODE_16052_length_1474_cov_5.6288_ID_1448050	GTTG
TR20974|c0_g6_i1	NODE_1611_length_3084_cov_5.36655_ID_552890	GCCG
TR20974|c0_g1_i1	NODE_1611_length_3084_cov_5.36655_ID_552890	CGGG
TR20974|c0_g7_i1	NODE_1611_length_3084_cov_5.36655_ID_552890	CGGG
TR20974|c0_g9_i1	NODE_1611_length_3084_cov_5.36655_ID_552890	GGAC
TR20974|c0_g10_i1	NODE_1611_length_3084_cov_5.36655_ID_552890	GGGC
TR20974|c0_g11_i2	NODE_1611_length_3084_cov_5.36655_ID_552890	GGGC
TR20974|c0_g6_i1	NODE_1611_length_3084_cov_5.36655_ID_552890	GGAC
TR20974|c0_g5_i1	NODE_1611_length_3084_cov_5.36655_ID_552890	TTGG
TR8210|c1_g1_i2	NODE_16168_length_1469_cov_6.88897_ID_742286	GCGG
TR8210|c1_g1_i2	NODE_16168_length_1469_cov_6.88897_ID_742286	GCGG
TR12078|c4_g14_i1	NODE_1622_length_3082_cov_2.70355_ID_359973	TTAG
TR30116|c0_g1_i1	NODE_16237_length_1467_cov_2.33358_ID_744028	GTTG
TR801|c0_g3_i1	NODE_16321_length_1466_cov_7.04114_ID_1019584	GTCA
TR50759|c0_g5_i2	NODE_16773_length_1446_cov_1.68357_ID_757992	ATAG
TR50759|c0_g4_i1	NODE_16773_length_1446_cov_1.68357_ID_757992	GCGG
TR50759|c0_g4_i1	NODE_16773_length_1446_cov_1.68357_ID_757992	TTAC
TR50759|c0_g3_i1	NODE_16773_length_1446_cov_1.68357_ID_757992	TTAC
TR40389|c0_g1_i1	NODE_16777_length_1448_cov_7.68433_ID_758096	GTAC
TR1701|c0_g1_i1	NODE_16832_length_1446_cov_1.32221_ID_759502	CATC
TR24452|c0_g1_i1	NODE_16887_length_1444_cov_10.4677_ID_761010	CCAA
TR47334|c0_g2_i12	NODE_169_length_4921_cov_6.08281_ID_330247	GGAT
TR47334|c0_g2_i5	NODE_169_length_4921_cov_6.08281_ID_330247	GGAT
TR47334|c0_g2_i21	NODE_169_length_4921_cov_6.08281_ID_330247	GTGG
TR47334|c0_g2_i21	NODE_169_length_4921_cov_6.08281_ID_330247	GTGG
TR40520|c0_g1_i2	NODE_16929_length_1442_cov_7.59924_ID_762076	CAAG
TR7736|c0_g1_i2	NODE_16950_length_1441_cov_3.17808_ID_762674	CAAG
TR7736|c0_g4_i2	NODE_16950_length_1441_cov_3.17808_ID_762674	CAAA
TR48344|c0_g1_i1	NODE_1698_length_3049_cov_4.29207_ID_361741	CTTC
TR3047|c0_g1_i1	NODE_17_length_6793_cov_12.1782_ID_351764	TGAC
TR3047|c0_g1_i1	NODE_17_length_6793_cov_12.1782_ID_351764	TGAC
TR3047|c0_g1_i1	NODE_17_length_6793_cov_12.1782_ID_351764	TGAC
TR21489|c0_g2_i1	NODE_1708_length_3046_cov_4.92052_ID_1072690	CTGG
TR17912|c0_g1_i1	NODE_17232_length_1431_cov_2.61196_ID_770533	ATAA
TR21634|c0_g1_i1	NODE_17306_length_1428_cov_3.65257_ID_772561	GGAG
TR9937|c0_g2_i1	NODE_1733_length_3028_cov_4.56065_ID_362521	GTAC
TR39620|c0_g1_i1	NODE_17361_length_1426_cov_3.78291_ID_773947	ACGC
TR39253|c0_g7_i1	NODE_17368_length_1426_cov_5.81447_ID_774103	ATAT
TR39253|c0_g3_i1	NODE_17368_length_1426_cov_5.81447_ID_774103	GCAA
TR39253|c0_g8_i1	NODE_17368_length_1426_cov_5.81447_ID_774103	ATAC
TR39253|c0_g14_i1	NODE_17368_length_1426_cov_5.81447_ID_774103	CCAA
TR39253|c0_g2_i1	NODE_17368_length_1426_cov_5.81447_ID_774103	CCAC
TR39253|c0_g12_i1	NODE_17368_length_1426_cov_5.81447_ID_774103	CCAC
TR39253|c0_g6_i1	NODE_17368_length_1426_cov_5.81447_ID_774103	TTAC
TR39253|c0_g10_i1	NODE_17368_length_1426_cov_5.81447_ID_774103	TTAC
TR13931|c0_g1_i2	NODE_17398_length_1425_cov_5.27966_ID_774935	ATCC
TR10559|c0_g1_i2	NODE_17676_length_1416_cov_0.869666_ID_782175	CAAG
TR1645|c0_g1_i1	NODE_17805_length_1412_cov_4.92062_ID_785765	GGTG
TR47306|c1_g2_i1	NODE_179_length_4861_cov_3.34981_ID_487599	CCAC
TR47306|c1_g2_i1	NODE_179_length_4861_cov_3.34981_ID_487599	CCAC
TR10995|c1_g9_i8	NODE_179_length_4861_cov_3.34981_ID_487599	CGAG
TR10995|c1_g9_i8	NODE_179_length_4861_cov_3.34981_ID_487599	GTAA
TR10995|c1_g9_i11	NODE_179_length_4861_cov_3.34981_ID_487599	GTAA
TR10995|c1_g9_i8	NODE_179_length_4861_cov_3.34981_ID_487599	CGAG
TR10995|c1_g9_i5	NODE_179_length_4861_cov_3.34981_ID_487599	GTAA
TR3802|c0_g1_i1	NODE_18091_length_1403_cov_8.30956_ID_793335	CTGG
TR42713|c0_g6_i1	NODE_1816_length_2984_cov_6.31364_ID_364575	CAGG
TR42713|c0_g8_i1	NODE_1816_length_2984_cov_6.31364_ID_364575	CATG
TR42713|c0_g3_i1	NODE_1816_length_2984_cov_6.31364_ID_364575	CCTC
TR42713|c0_g3_i1	NODE_1816_length_2984_cov_6.31364_ID_364575	CCTC
TR487|c0_g1_i2	NODE_18173_length_1400_cov_3.06284_ID_795545	CAAA
TR49898|c0_g1_i2	NODE_18327_length_1395_cov_13.4156_ID_799559	GCGG
TR24620|c0_g1_i1	NODE_18336_length_1391_cov_6.05442_ID_799767	GAAG
TR4261|c0_g1_i1	NODE_18336_length_1391_cov_6.05442_ID_799767	GGGG
TR32583|c0_g1_i1	NODE_18426_length_1392_cov_7.47668_ID_802107	GTTT
TR32145|c0_g3_i2	NODE_18481_length_1390_cov_5.33333_ID_2078224	ATAC
TR16238|c0_g1_i1	NODE_18497_length_1387_cov_5.0578_ID_804111	AGCC
TR42893|c0_g2_i1	NODE_18504_length_1390_cov_4.35234_ID_804293	GGTG
TR5091|c2_g4_i1	NODE_1867_length_2965_cov_7.0148_ID_676615	GAGG
TR790|c2_g4_i3	NODE_18718_length_1383_cov_5.42436_ID_810119	CCAC
TR3198|c0_g1_i1	NODE_18726_length_1382_cov_2.21434_ID_810301	ATGC
TR32982|c0_g1_i2	NODE_18823_length_1379_cov_2.11741_ID_812849	CCAC
TR19195|c0_g1_i2	NODE_1903_length_2952_cov_3.39292_ID_366395	GAAG
TR19195|c0_g1_i2	NODE_1903_length_2952_cov_3.39292_ID_366395	GCAA
TR4506|c0_g1_i1	NODE_1907_length_2949_cov_3.95322_ID_366473	GAAG
TR32180|c3_g6_i2	NODE_19152_length_1366_cov_4.66023_ID_822211	GGAA
TR9130|c0_g1_i1	NODE_1918_length_2946_cov_4.37034_ID_366759	CCTG
TR40303|c0_g5_i1	NODE_19219_length_1367_cov_7.71855_ID_1562338	CCGC
TR40303|c0_g1_i1	NODE_19219_length_1367_cov_7.71855_ID_1562338	CCAG
TR40303|c0_g3_i1	NODE_19219_length_1367_cov_7.71855_ID_1562338	CTTG
TR48224|c0_g2_i1	NODE_19219_length_1367_cov_7.71855_ID_1562338	TTGC
TR26994|c0_g5_i2	NODE_19287_length_1365_cov_6.49758_ID_825695	CGTG
TR26994|c0_g5_i2	NODE_19287_length_1365_cov_6.49758_ID_825695	TTAT
TR7787|c0_g5_i1	NODE_19300_length_1364_cov_2.48019_ID_826111	CGAA
TR7787|c0_g3_i1	NODE_19300_length_1364_cov_2.48019_ID_826111	CGGC
TR7787|c0_g4_i1	NODE_19300_length_1364_cov_2.48019_ID_826111	CGAC
TR5186|c0_g1_i1	NODE_19308_length_1364_cov_6.89006_ID_826319	GTTC
TR7523|c4_g2_i2	NODE_1935_length_2936_cov_0.219651_ID_367149	GGTC
TR15179|c1_g1_i5	NODE_1935_length_2936_cov_0.219651_ID_367149	GTAT
TR15179|c1_g1_i11	NODE_1935_length_2936_cov_0.219651_ID_367149	GTAT
TR9021|c0_g1_i1	NODE_19358_length_1362_cov_2.93765_ID_827619	CTAA
TR40647|c0_g1_i1	NODE_19397_length_1360_cov_8.39546_ID_828791	GGAT
TR43458|c0_g1_i1	NODE_19419_length_1360_cov_1.66829_ID_829337	ATAC
TR15123|c1_g4_i2	NODE_19535_length_1356_cov_5.04882_ID_832596	CAAG
TR6692|c0_g1_i1	NODE_19626_length_1353_cov_5.95759_ID_835430	GCTG
TR51326|c0_g1_i2	NODE_19689_length_1350_cov_9.60294_ID_837128	GTTG
TR24030|c1_g3_i5	NODE_19702_length_1352_cov_263.917_ID_2619042	ATAT
TR6960|c0_g1_i2	NODE_19744_length_1349_cov_3.76105_ID_838688	CTGG
TR25063|c0_g1_i2	NODE_19806_length_1348_cov_9.64373_ID_840562	GTAC
TR25063|c0_g1_i2	NODE_19806_length_1348_cov_9.64373_ID_840562	GTAC
TR25071|c1_g3_i1	NODE_19817_length_1347_cov_6.30492_ID_840848	GCGG
TR247|c0_g6_i1	NODE_19842_length_1346_cov_3.50861_ID_841552	ACAC
TR247|c0_g7_i1	NODE_19842_length_1346_cov_3.50861_ID_841552	ACAC
TR37878|c0_g1_i1	NODE_19893_length_1345_cov_6.74056_ID_842854	GTCG
TR21865|c0_g3_i2	NODE_19893_length_1345_cov_6.74056_ID_842854	GTCG
TR18951|c0_g1_i1	NODE_19893_length_1345_cov_6.74056_ID_842854	GTCG
TR37878|c0_g1_i1	NODE_19893_length_1345_cov_6.74056_ID_842854	GTCG
TR39819|c0_g1_i1	NODE_1996_length_2913_cov_11.8751_ID_368716	GTAC
TR44399|c0_g15_i1	NODE_20046_length_1340_cov_2.91591_ID_2821170	CTGG
TR28157|c1_g5_i1	NODE_20066_length_1340_cov_9.23331_ID_847296	ATGC
TR28157|c1_g6_i1	NODE_20066_length_1340_cov_9.23331_ID_847296	GTCT
TR28157|c1_g4_i1	NODE_20066_length_1340_cov_9.23331_ID_847296	ATTC
TR19868|c1_g1_i1	NODE_20354_length_1331_cov_4.19518_ID_854994	CTTT
TR24040|c0_g1_i3	NODE_20439_length_1329_cov_0.928393_ID_857178	CCAC
TR24040|c0_g1_i3	NODE_20439_length_1329_cov_0.928393_ID_857178	CGAC
TR24040|c0_g1_i3	NODE_20439_length_1329_cov_0.928393_ID_857178	CGAC
TR24040|c0_g1_i1	NODE_20439_length_1329_cov_0.928393_ID_857178	CGCG
TR26489|c0_g2_i1	NODE_20667_length_1321_cov_6.12469_ID_863294	GTAA
TR23985|c0_g8_i4	NODE_2067_length_2888_cov_9.0678_ID_370356	CGAC
TR9925|c1_g1_i1	NODE_20699_length_1321_cov_2.8258_ID_864126	GTAT
TR815|c1_g7_i6	NODE_20699_length_1321_cov_2.8258_ID_864126	ATAC
TR815|c1_g7_i6	NODE_20699_length_1321_cov_2.8258_ID_864126	ATAC
TR7844|c0_g1_i1	NODE_2072_length_2884_cov_4.17301_ID_679867	TTAC
TR45302|c2_g1_i1	NODE_2074_length_2882_cov_5.73621_ID_991816	CGAC
TR25349|c0_g1_i1	NODE_2077_length_2885_cov_4.69764_ID_370590	CCAG
TR30357|c0_g1_i1	NODE_20793_length_1316_cov_1.74307_ID_866752	GAAG
TR8210|c1_g1_i2	NODE_20797_length_1318_cov_8.37951_ID_866856	CTGG
TR23988|c3_g2_i2	NODE_20841_length_1317_cov_10.884_ID_868052	ACAG
TR519|c0_g1_i1	NODE_20927_length_1314_cov_2.97978_ID_870304	GTGG
TR9066|c0_g1_i1	NODE_2127_length_2859_cov_3.40922_ID_371812	CGTG
TR17466|c0_g1_i1	NODE_2135_length_2854_cov_4.80675_ID_371994	GGGG
TR7161|c0_g1_i1	NODE_21464_length_1297_cov_0.279487_ID_884332	GATG
TR15843|c0_g1_i1	NODE_21483_length_1297_cov_11.0043_ID_884800	ATGG
TR39786|c0_g1_i1	NODE_2155_length_2849_cov_2.64916_ID_372488	CTTC
TR12078|c4_g14_i1	NODE_21606_length_1294_cov_6.9503_ID_888050	GTCG
TR52452|c0_g1_i1	NODE_21654_length_1292_cov_2.00687_ID_889459	TAAG
TR13229|c0_g1_i1	NODE_2183_length_2840_cov_5.35901_ID_373086	AGTG
TR13229|c0_g17_i1	NODE_2183_length_2840_cov_5.35901_ID_373086	AGTG
TR13229|c0_g16_i1	NODE_2183_length_2840_cov_5.35901_ID_373086	CACG
TR13229|c0_g12_i1	NODE_2183_length_2840_cov_5.35901_ID_373086	CTTG
TR13229|c0_g15_i1	NODE_2183_length_2840_cov_5.35901_ID_373086	CTTC
TR13229|c0_g6_i1	NODE_2183_length_2840_cov_5.35901_ID_373086	CTTG
TR13229|c0_g5_i1	NODE_2183_length_2840_cov_5.35901_ID_373086	CTAA
TR13967|c0_g4_i1	NODE_21988_length_1283_cov_3.44377_ID_1870111	CGAC
TR13967|c0_g1_i1	NODE_21988_length_1283_cov_3.44377_ID_1870111	CGAC
TR32117|c0_g2_i1	NODE_2205_length_2835_cov_8.00111_ID_685405	ATAG
TR32117|c0_g2_i1	NODE_2205_length_2835_cov_8.00111_ID_685405	ATAG
TR49497|c0_g1_i3	NODE_22074_length_1281_cov_2.20364_ID_900315	TCAG
TR12078|c4_g12_i1	NODE_22155_length_1277_cov_4.1503_ID_902449	CAAG
TR16878|c0_g1_i2	NODE_225_length_4685_cov_4.75581_ID_331183	GAAG
TR16878|c0_g1_i2	NODE_225_length_4685_cov_4.75581_ID_331183	GAAG
TR8956|c0_g4_i5	NODE_22736_length_1263_cov_3.3706_ID_918267	CGAG
TR51174|c0_g1_i1	NODE_2286_length_2803_cov_4.84541_ID_375742	CCAT
TR31458|c0_g7_i2	NODE_22908_length_1259_cov_2.03887_ID_922897	CCTG
TR31458|c0_g7_i2	NODE_22908_length_1259_cov_2.03887_ID_922897	CATT
TR31458|c0_g7_i2	NODE_22908_length_1259_cov_2.03887_ID_922897	CATT
TR31458|c0_g7_i2	NODE_22908_length_1259_cov_2.03887_ID_922897	CATT
TR31458|c0_g7_i2	NODE_22908_length_1259_cov_2.03887_ID_922897	CATT
TR31458|c0_g7_i2	NODE_22908_length_1259_cov_2.03887_ID_922897	CATT
TR31458|c0_g7_i2	NODE_22908_length_1259_cov_2.03887_ID_922897	CATT
TR30674|c0_g6_i1	NODE_2299_length_2800_cov_3.99813_ID_376028	AAGC
TR30674|c0_g5_i1	NODE_2299_length_2800_cov_3.99813_ID_376028	CGAG
TR30674|c0_g3_i1	NODE_2299_length_2800_cov_3.99813_ID_376028	CGAG
TR30674|c0_g2_i1	NODE_2299_length_2800_cov_3.99813_ID_376028	CGCG
TR30674|c0_g4_i1	NODE_2299_length_2800_cov_3.99813_ID_376028	CGAG
TR30674|c0_g1_i3	NODE_2299_length_2800_cov_3.99813_ID_376028	CGCG
TR30674|c0_g1_i1	NODE_2299_length_2800_cov_3.99813_ID_376028	CTTG
TR30674|c0_g1_i2	NODE_2299_length_2800_cov_3.99813_ID_376028	GGGC
TR30674|c0_g8_i1	NODE_2299_length_2800_cov_3.99813_ID_376028	GGGC
TR30674|c0_g1_i2	NODE_2299_length_2800_cov_3.99813_ID_376028	TGGC
TR30674|c0_g3_i1	NODE_2299_length_2800_cov_3.99813_ID_376028	TGGC
TR7792|c0_g1_i6	NODE_2315_length_2797_cov_5.86255_ID_376392	CATC
TR25403|c2_g1_i1	NODE_23188_length_1250_cov_1.26803_ID_930657	GAAG
TR40677|c0_g1_i1	NODE_23195_length_1250_cov_1.77471_ID_930813	CGAG
TR8210|c1_g1_i2	NODE_23287_length_1248_cov_9.4612_ID_933158	GCGG
TR8210|c1_g1_i2	NODE_23287_length_1248_cov_9.4612_ID_933158	GCGG
TR12078|c4_g7_i1	NODE_23287_length_1248_cov_9.4612_ID_933158	CAAC
TR12078|c4_g11_i1	NODE_23287_length_1248_cov_9.4612_ID_933158	CCAT
TR25813|c0_g2_i1	NODE_23305_length_1248_cov_6.77877_ID_933652	TTAA
TR34904|c0_g2_i1	NODE_23610_length_1239_cov_2.88769_ID_941794	CGGG
TR23182|c0_g1_i1	NODE_2364_length_2777_cov_5.73369_ID_377645	CAAC
TR4909|c1_g1_i1	NODE_2366_length_2778_cov_4.19653_ID_377697	TTAC
TR205|c0_g2_i1	NODE_2383_length_2770_cov_2.51154_ID_612408	GAAA
TR205|c0_g2_i1	NODE_2383_length_2770_cov_2.51154_ID_612408	GAAA
TR227|c1_g1_i4	NODE_24_length_6573_cov_5.53801_ID_328083	TTAG
TR30707|c0_g1_i2	NODE_24143_length_1228_cov_1.84559_ID_956014	CAAA
TR30707|c0_g1_i2	NODE_24143_length_1228_cov_1.84559_ID_956014	CAAA
TR37928|c0_g1_i1	NODE_2415_length_2750_cov_4.41961_ID_378867	CACC
TR30486|c0_g1_i1	NODE_24156_length_1227_cov_1.57727_ID_956352	CAAC
TR15843|c0_g1_i1	NODE_24263_length_1225_cov_15.5246_ID_959238	AAAC
TR43608|c0_g1_i1	NODE_24289_length_1224_cov_4.05287_ID_960044	GTAT
TR49337|c0_g1_i1	NODE_24308_length_1224_cov_2.11395_ID_960486	CAGC
TR8984|c1_g1_i4	NODE_2441_length_2752_cov_8.47695_ID_379387	GAAG
TR8984|c1_g1_i4	NODE_2441_length_2752_cov_8.47695_ID_379387	GTGG
TR8984|c1_g1_i3	NODE_2441_length_2752_cov_8.47695_ID_379387	GAAG
TR8984|c1_g1_i3	NODE_2441_length_2752_cov_8.47695_ID_379387	GTGG
TR6979|c0_g1_i2	NODE_24443_length_1220_cov_2.19762_ID_964022	CACC
TR28559|c0_g2_i2	NODE_24596_length_1216_cov_5.79614_ID_968186	CAAC
TR7997|c0_g1_i1	NODE_24663_length_1214_cov_2.67188_ID_969987	CGAA
TR45974|c0_g1_i1	NODE_2468_length_2733_cov_6.57667_ID_379881	ATAC
TR8210|c1_g1_i2	NODE_24744_length_1213_cov_9.12247_ID_971963	GCGG
TR8210|c1_g1_i2	NODE_24744_length_1213_cov_9.12247_ID_971963	GCGG
TR7504|c0_g1_i6	NODE_24784_length_1211_cov_4.69124_ID_2486533	CTAA
TR52600|c0_g1_i1	NODE_2482_length_2736_cov_13.4843_ID_380219	GGAG
TR33383|c0_g1_i2	NODE_24831_length_1211_cov_6.53875_ID_974307	GTAC
TR32166|c0_g2_i1	NODE_24841_length_1211_cov_3.37269_ID_974650	CCAG
TR46148|c0_g1_i1	NODE_24878_length_1210_cov_2.97969_ID_975612	GCTT
TR16270|c1_g1_i2	NODE_24972_length_1207_cov_8.71481_ID_2447159	CTAA
TR39844|c0_g1_i1	NODE_2498_length_2734_cov_2.58957_ID_380609	CTGG
TR28303|c0_g1_i1	NODE_25159_length_1202_cov_5.36837_ID_983152	GTGT
TR47300|c0_g1_i1	NODE_25298_length_1199_cov_8.46082_ID_986766	TTAA
TR12772|c0_g2_i1	NODE_25390_length_1197_cov_3.18785_ID_989340	CCAC
TR12772|c0_g2_i1	NODE_25390_length_1197_cov_3.18785_ID_989340	CCAC
TR46644|c0_g1_i1	NODE_25397_length_1197_cov_11.8935_ID_989548	GGAG
TR26795|c0_g1_i1	NODE_2542_length_2722_cov_10.4906_ID_381675	ATAT
TR45739|c0_g1_i1	NODE_25505_length_1194_cov_14.6467_ID_992700	TAAC
TR48378|c0_g1_i1	NODE_25529_length_1193_cov_59.6229_ID_2749901	CCAC
TR47588|c0_g1_i2	NODE_25535_length_1193_cov_2.88649_ID_993480	GTCG
TR47588|c0_g1_i2	NODE_25535_length_1193_cov_2.88649_ID_993480	GTGC
TR26961|c1_g1_i2	NODE_257_length_4570_cov_20.2367_ID_2796331	CTTC
TR8052|c0_g1_i1	NODE_25738_length_1189_cov_7.06968_ID_998921	GAAG
TR10110|c0_g1_i2	NODE_25873_length_1182_cov_3.15203_ID_1002612	GCTG
TR24574|c0_g1_i1	NODE_2589_length_2708_cov_6.67028_ID_2454128	ATAC
TR47946|c0_g1_i1	NODE_26062_length_1182_cov_0.83981_ID_1008046	GTGG
TR22768|c0_g1_i1	NODE_26073_length_1182_cov_8.52322_ID_1008332	GAAC
TR11650|c0_g1_i1	NODE_2611_length_2701_cov_2.68765_ID_383261	TTAC
TR29175|c0_g1_i2	NODE_26209_length_1179_cov_1.49525_ID_1011868	CAAC
TR29309|c0_g1_i1	NODE_26440_length_1174_cov_6.915_ID_1018154	GTTC
TR40592|c0_g1_i1	NODE_2652_length_2688_cov_1.67825_ID_384485	CTTC
TR19905|c0_g1_i1	NODE_26617_length_1170_cov_1.25024_ID_1022808	GTTT
TR19905|c0_g1_i2	NODE_26617_length_1170_cov_1.25024_ID_1022808	CAGT
TR42167|c0_g2_i1	NODE_26673_length_1169_cov_10.6305_ID_1024264	CTTC
TR51774|c0_g1_i3	NODE_2679_length_2680_cov_3.54093_ID_385222	CAAC
TR46544|c1_g1_i1	NODE_26790_length_1166_cov_3.06064_ID_1027440	GTTG
TR29985|c0_g1_i1	NODE_26803_length_1166_cov_7.69586_ID_1027752	ATAC
TR5495|c0_g1_i1	NODE_2694_length_2676_cov_4.30902_ID_385482	GCTG
TR43288|c0_g1_i2	NODE_2696_length_2676_cov_7.15575_ID_1011452	ATGA
TR24608|c0_g1_i1	NODE_27120_length_1160_cov_8.40852_ID_1036104	GGAG
TR50202|c0_g1_i2	NODE_27184_length_1159_cov_4.31492_ID_1037406	GCGG
TR50202|c0_g1_i2	NODE_27184_length_1159_cov_4.31492_ID_1037406	CGGC
TR8210|c1_g1_i2	NODE_27255_length_1157_cov_3.5_ID_1039462	GTGG
TR8210|c1_g1_i2	NODE_27255_length_1157_cov_3.5_ID_1039462	GTGG
TR23979|c0_g1_i3	NODE_27279_length_1157_cov_5.35437_ID_1040112	AAAC
TR21712|c0_g1_i1	NODE_27311_length_1156_cov_23.6793_ID_2461357	GTAA
TR44395|c0_g1_i1	NODE_27597_length_1150_cov_2.14272_ID_1049068	ATAA
TR54048|c0_g1_i2	NODE_27665_length_1149_cov_6.16341_ID_2790372	GTGT
TR35519|c0_g1_i1	NODE_2768_length_2661_cov_3.23192_ID_387354	GGGC
TR8985|c0_g4_i1	NODE_27753_length_1148_cov_4.31275_ID_1053282	GTAT
TR8210|c1_g1_i2	NODE_27798_length_1146_cov_12.6153_ID_1054480	GCGG
TR8210|c1_g1_i2	NODE_27798_length_1146_cov_12.6153_ID_1054480	GCGG
TR21234|c0_g1_i1	NODE_27896_length_1144_cov_13.4454_ID_1056926	CTAA
TR12619|c0_g5_i3	NODE_27912_length_1144_cov_11.885_ID_2829716	CGGG
TR12619|c0_g5_i1	NODE_27912_length_1144_cov_11.885_ID_2829716	CGGG
TR6625|c0_g1_i1	NODE_28016_length_1141_cov_1.23274_ID_1060284	TGAG
TR12765|c0_g2_i1	NODE_28183_length_1138_cov_14.458_ID_2444399	CGAA
TR13261|c0_g2_i1	NODE_282_length_4511_cov_7.80821_ID_331989	CGGG
TR12095|c4_g1_i1	NODE_28305_length_1136_cov_4.667_ID_1067618	CTTC
TR42|c0_g1_i1	NODE_2839_length_2637_cov_4.96616_ID_493689	CGAG
TR50762|c0_g1_i3	NODE_28534_length_1130_cov_1.89741_ID_1073782	CCAC
TR16300|c0_g1_i1	NODE_28555_length_1131_cov_13.6215_ID_2164459	GCAC
TR41431|c0_g2_i1	NODE_288_length_4488_cov_3.36139_ID_332145	AAAC
TR33762|c0_g1_i1	NODE_2893_length_2625_cov_1.33707_ID_390474	CGTG
TR12646|c0_g1_i1	NODE_2899_length_2625_cov_2.21898_ID_390604	GAAG
TR34043|c0_g3_i1	NODE_29014_length_1121_cov_2.64085_ID_1086642	TAGC
TR51284|c0_g3_i1	NODE_29296_length_1116_cov_7.65319_ID_1094364	CATG
TR15519|c0_g1_i1	NODE_2935_length_2611_cov_3.86018_ID_391358	CGAT
TR8210|c1_g1_i2	NODE_29391_length_1114_cov_6.58055_ID_1096782	GCGG
TR43608|c0_g1_i1	NODE_29393_length_1114_cov_3.85917_ID_1096834	CTTG
TR30787|c3_g4_i4	NODE_29456_length_1113_cov_2.53753_ID_1098394	CGAG
TR50392|c0_g1_i1	NODE_29585_length_1110_cov_2.69074_ID_1101882	GAGG
TR21807|c0_g1_i2	NODE_29767_length_1107_cov_8.45612_ID_1106836	TTAA
TR47186|c0_g1_i1	NODE_298_length_4467_cov_3.91544_ID_332327	CACC
TR11877|c0_g1_i1	NODE_298_length_4467_cov_3.91544_ID_332327	CACC
TR48013|c0_g1_i1	NODE_298_length_4467_cov_3.91544_ID_332327	CTTC
TR48013|c0_g1_i1	NODE_298_length_4467_cov_3.91544_ID_332327	CTTC
TR21055|c1_g1_i1	NODE_29818_length_1106_cov_15.8938_ID_1108162	GCCG
TR21055|c1_g1_i1	NODE_29818_length_1106_cov_15.8938_ID_1108162	GCCG
TR21055|c1_g1_i1	NODE_29818_length_1106_cov_15.8938_ID_1108162	GCCG
TR21055|c1_g1_i1	NODE_29818_length_1106_cov_15.8938_ID_1108162	GCCG
TR21055|c1_g1_i1	NODE_29818_length_1106_cov_15.8938_ID_1108162	GCCG
TR21055|c1_g1_i1	NODE_29818_length_1106_cov_15.8938_ID_1108162	GCCG
TR21055|c1_g1_i1	NODE_29818_length_1106_cov_15.8938_ID_1108162	CCAT
TR4015|c0_g2_i1	NODE_2986_length_2604_cov_6.88817_ID_392660	CCAC
TR24817|c2_g1_i1	NODE_300_length_4454_cov_6.26577_ID_332353	ATTG
TR47417|c0_g1_i1	NODE_30142_length_1092_cov_6.65468_ID_1116652	GCAT
TR208|c2_g8_i1	NODE_30294_length_1097_cov_8.64845_ID_1120566	GTAC
TR208|c2_g8_i1	NODE_30294_length_1097_cov_8.64845_ID_1120566	TTAC
TR208|c2_g8_i1	NODE_30294_length_1097_cov_8.64845_ID_1120566	TTAC
TR208|c2_g8_i1	NODE_30294_length_1097_cov_8.64845_ID_1120566	TTAC
TR208|c2_g8_i1	NODE_30294_length_1097_cov_8.64845_ID_1120566	TTAC
TR208|c2_g8_i1	NODE_30294_length_1097_cov_8.64845_ID_1120566	TTAC
TR208|c2_g8_i1	NODE_30294_length_1097_cov_8.64845_ID_1120566	TTAC
TR33862|c0_g1_i1	NODE_30294_length_1097_cov_8.64845_ID_1120566	TTAC
TR44812|c0_g4_i1	NODE_30373_length_1095_cov_2.74277_ID_1122620	TTGC
TR44812|c0_g1_i1	NODE_30373_length_1095_cov_2.74277_ID_1122620	TTTG
TR44812|c0_g4_i1	NODE_30373_length_1095_cov_2.74277_ID_1122620	TTGG
TR44812|c0_g2_i1	NODE_30373_length_1095_cov_2.74277_ID_1122620	TTTG
TR24749|c0_g2_i2	NODE_3039_length_2590_cov_4.29261_ID_394014	GTCG
TR24749|c0_g2_i2	NODE_3039_length_2590_cov_4.29261_ID_394014	GTCG
TR32753|c0_g1_i1	NODE_30425_length_1095_cov_3.35331_ID_1124028	GTGG
TR2976|c0_g9_i7	NODE_30555_length_1092_cov_1.52953_ID_1127408	GTCC
TR39302|c0_g1_i1	NODE_30558_length_1092_cov_2.77098_ID_1127514	GCGA
TR39302|c0_g1_i1	NODE_30558_length_1092_cov_2.77098_ID_1127514	GCGA
TR24952|c0_g1_i1	NODE_30581_length_1084_cov_3.92539_ID_1128138	CAAG
TR24000|c0_g1_i1	NODE_3062_length_2585_cov_4.34756_ID_394534	GTCG
TR24000|c0_g1_i1	NODE_3062_length_2585_cov_4.34756_ID_394534	TTAC
TR8210|c1_g1_i2	NODE_3071_length_2585_cov_5.16517_ID_394742	GTGG
TR12078|c4_g14_i1	NODE_3071_length_2585_cov_5.16517_ID_394742	GTGG
TR46587|c0_g1_i1	NODE_308_length_4425_cov_3.17679_ID_378659	GTAT
TR11301|c0_g1_i2	NODE_30860_length_1086_cov_2.20647_ID_1135409	GTAC
TR25813|c0_g2_i1	NODE_30882_length_1086_cov_6.87174_ID_1135955	CAAC
TR54212|c1_g1_i1	NODE_3089_length_2581_cov_9.71231_ID_395158	CCCG
TR12003|c0_g11_i1	NODE_30971_length_1084_cov_13.2508_ID_2391619	GTAA
TR16016|c0_g1_i1	NODE_31005_length_1084_cov_1.12957_ID_1139108	GGAC
TR16016|c0_g1_i1	NODE_31005_length_1084_cov_1.12957_ID_1139108	GTGG
TR16016|c0_g1_i2	NODE_31005_length_1084_cov_1.12957_ID_1139108	ATAT
TR38804|c0_g2_i1	NODE_3128_length_2573_cov_4.53925_ID_396172	CTGG
TR38804|c0_g2_i1	NODE_3128_length_2573_cov_4.53925_ID_396172	CTGG
TR33856|c0_g1_i2	NODE_3130_length_2573_cov_4.27433_ID_396224	CCTC
TR33856|c0_g1_i2	NODE_3130_length_2573_cov_4.27433_ID_396224	CGAG
TR32877|c0_g1_i1	NODE_31670_length_1072_cov_21.9524_ID_2503680	GTAA
TR41463|c0_g1_i3	NODE_31766_length_1070_cov_5.21951_ID_2435644	ATAG
TR41463|c0_g1_i2	NODE_31766_length_1070_cov_5.21951_ID_2435644	ATGC
TR28394|c1_g1_i1	NODE_3178_length_2558_cov_17.4682_ID_397368	CAGC
TR36191|c0_g1_i1	NODE_3229_length_2554_cov_4.40173_ID_398460	CCAC
TR1566|c0_g1_i1	NODE_32293_length_1060_cov_4.02463_ID_1172880	CAAA
TR1566|c0_g1_i1	NODE_32293_length_1060_cov_4.02463_ID_1172880	CAAG
TR1566|c0_g1_i1	NODE_32293_length_1060_cov_4.02463_ID_1172880	CAAG
TR1566|c0_g1_i1	NODE_32293_length_1060_cov_4.02463_ID_1172880	CAAA
TR14990|c0_g2_i1	NODE_32344_length_1060_cov_0.935691_ID_1174232	CTTG
TR14990|c0_g1_i1	NODE_32344_length_1060_cov_0.935691_ID_1174232	CTTG
TR234|c1_g2_i3	NODE_32479_length_1058_cov_6.27068_ID_1177664	CGAG
TR41153|c0_g1_i1	NODE_325_length_4376_cov_4.96659_ID_332847	CATC
TR2996|c0_g7_i4	NODE_32576_length_1056_cov_1.6028_ID_1180165	CTTC
TR2996|c0_g7_i4	NODE_32576_length_1056_cov_1.6028_ID_1180165	CTTC
TR11070|c0_g3_i1	NODE_32612_length_1049_cov_3.70291_ID_1181183	CAAT
TR4522|c0_g1_i1	NODE_32804_length_1052_cov_1.29514_ID_1186197	CTTC
TR42558|c0_g1_i2	NODE_3314_length_2540_cov_7.71269_ID_400566	AAAG
TR42558|c0_g1_i2	NODE_3314_length_2540_cov_7.71269_ID_400566	TTAG
TR13242|c1_g2_i8	NODE_3322_length_2537_cov_4.23568_ID_400774	GAAG
TR13242|c1_g2_i7	NODE_3322_length_2537_cov_4.23568_ID_400774	GGAG
TR39585|c0_g1_i1	NODE_33229_length_1045_cov_2.38235_ID_1197262	CTTG
TR2877|c0_g1_i1	NODE_33238_length_1044_cov_1.5867_ID_1197496	CTAA
TR23174|c0_g7_i1	NODE_3342_length_2531_cov_14.3295_ID_2764809	GAAG
TR23174|c0_g4_i1	NODE_3342_length_2531_cov_14.3295_ID_2764809	GAAG
TR23174|c0_g1_i1	NODE_3342_length_2531_cov_14.3295_ID_2764809	GATG
TR23174|c0_g10_i1	NODE_3342_length_2531_cov_14.3295_ID_2764809	GGGG
TR23174|c0_g8_i1	NODE_3342_length_2531_cov_14.3295_ID_2764809	GGGG
TR23174|c0_g9_i1	NODE_3342_length_2531_cov_14.3295_ID_2764809	AGAG
TR23174|c0_g4_i1	NODE_3342_length_2531_cov_14.3295_ID_2764809	CGGG
TR23174|c0_g2_i1	NODE_3342_length_2531_cov_14.3295_ID_2764809	CGGG
TR14315|c0_g1_i1	NODE_33464_length_1041_cov_10.7998_ID_1203093	CTTG
TR15128|c0_g1_i2	NODE_3348_length_2529_cov_5.79484_ID_401346	TTAG
TR15128|c0_g1_i4	NODE_3348_length_2529_cov_5.79484_ID_401346	TTAG
TR8210|c1_g1_i2	NODE_33556_length_1039_cov_3.68421_ID_1205433	GCGG
TR47670|c0_g2_i1	NODE_33829_length_1035_cov_1.78414_ID_1212193	GAAG
TR47670|c0_g3_i1	NODE_33829_length_1035_cov_1.78414_ID_1212193	GAAG
TR792|c0_g23_i1	NODE_3390_length_2518_cov_17.1546_ID_2455600	TTTG
TR792|c0_g10_i1	NODE_3390_length_2518_cov_17.1546_ID_2455600	TTTG
TR792|c0_g17_i1	NODE_3390_length_2518_cov_17.1546_ID_2455600	TTTG
TR790|c2_g2_i1	NODE_34015_length_1031_cov_1.98343_ID_1217067	CCTC
TR19788|c0_g1_i2	NODE_3404_length_2518_cov_5.52949_ID_519653	ATAC
TR8210|c1_g1_i2	NODE_34372_length_1026_cov_4.75528_ID_1226859	GCGG
TR8210|c1_g1_i2	NODE_34372_length_1026_cov_4.75528_ID_1226859	GCGG
TR31337|c0_g7_i1	NODE_3443_length_2510_cov_1.91481_ID_403712	CAAA
TR31337|c0_g7_i1	NODE_3443_length_2510_cov_1.91481_ID_403712	TTTG
TR28154|c1_g2_i5	NODE_34544_length_1023_cov_4.45089_ID_1231525	CGCC
TR28415|c0_g1_i1	NODE_34579_length_1023_cov_13.6217_ID_1232409	CTTC
TR21836|c0_g1_i3	NODE_34771_length_1020_cov_19.9418_ID_2445524	GTTG
TR13211|c1_g1_i1	NODE_34776_length_1017_cov_3.99664_ID_1237715	CAAT
TR13211|c1_g1_i1	NODE_34776_length_1017_cov_3.99664_ID_1237715	CAAT
TR13211|c1_g1_i1	NODE_34776_length_1017_cov_3.99664_ID_1237715	CGAC
TR29184|c0_g1_i1	NODE_34893_length_1018_cov_8.70595_ID_1240627	CTAA
TR29184|c0_g6_i1	NODE_34893_length_1018_cov_8.70595_ID_1240627	CTTT
TR36971|c0_g1_i1	NODE_35056_length_1015_cov_0.527027_ID_1244919	GTGG
TR23708|c0_g4_i1	NODE_35073_length_1015_cov_9.86036_ID_1245361	CCAC
TR23708|c0_g3_i1	NODE_35073_length_1015_cov_9.86036_ID_1245361	CGAC
TR23708|c0_g5_i1	NODE_35073_length_1015_cov_9.86036_ID_1245361	GATC
TR10895|c0_g2_i1	NODE_3515_length_2496_cov_4.72267_ID_405480	CGAG
TR10895|c0_g2_i1	NODE_3515_length_2496_cov_4.72267_ID_405480	CGAG
TR10895|c0_g14_i1	NODE_3515_length_2496_cov_4.72267_ID_405480	CGAG
TR10895|c0_g13_i1	NODE_3515_length_2496_cov_4.72267_ID_405480	CGAG
TR10895|c0_g2_i1	NODE_3515_length_2496_cov_4.72267_ID_405480	CGAG
TR10895|c0_g2_i1	NODE_3515_length_2496_cov_4.72267_ID_405480	CGAG
TR49623|c0_g1_i1	NODE_35301_length_1011_cov_7.02036_ID_1251459	CCAC
TR31454|c0_g2_i1	NODE_35307_length_1011_cov_5.39819_ID_1251615	GTGG
TR41440|c1_g1_i3	NODE_3575_length_2483_cov_2.99278_ID_407120	ATTG
TR41440|c1_g2_i1	NODE_3575_length_2483_cov_2.99278_ID_407120	CTTG
TR41440|c1_g1_i3	NODE_3575_length_2483_cov_2.99278_ID_407120	CTTG
TR41440|c1_g1_i4	NODE_3575_length_2483_cov_2.99278_ID_407120	CTTG
TR41440|c1_g4_i2	NODE_3575_length_2483_cov_2.99278_ID_407120	CTTG
TR41440|c1_g4_i3	NODE_3575_length_2483_cov_2.99278_ID_407120	CTTG
TR5079|c0_g1_i1	NODE_35760_length_1005_cov_5.62415_ID_1263517	CATC
TR11052|c1_g1_i4	NODE_36_length_6122_cov_5.03335_ID_417447	GTAC
TR26650|c0_g1_i2	NODE_36036_length_1001_cov_6.93936_ID_1270719	TTAG
TR40647|c0_g1_i1	NODE_36090_length_1000_cov_1.91523_ID_1272097	CTGT
TR23970|c0_g1_i5	NODE_3610_length_2475_cov_10.9664_ID_408058	GTCG
TR23970|c0_g2_i1	NODE_3610_length_2475_cov_10.9664_ID_408058	GTCG
TR23970|c0_g5_i1	NODE_3610_length_2475_cov_10.9664_ID_408058	GTCG
TR23970|c0_g4_i2	NODE_3610_length_2475_cov_10.9664_ID_408058	GTCG
TR23970|c0_g4_i2	NODE_3610_length_2475_cov_10.9664_ID_408058	GTCG
TR23970|c0_g4_i2	NODE_3610_length_2475_cov_10.9664_ID_408058	GTCG
TR23970|c0_g4_i2	NODE_3610_length_2475_cov_10.9664_ID_408058	GTCG
TR23970|c0_g2_i1	NODE_3610_length_2475_cov_10.9664_ID_408058	GTCG
TR23970|c0_g1_i5	NODE_3610_length_2475_cov_10.9664_ID_408058	GTCG
TR23970|c0_g4_i2	NODE_3610_length_2475_cov_10.9664_ID_408058	GTCG
TR45940|c0_g1_i1	NODE_36173_length_999_cov_3.22936_ID_1274255	CTTC
TR8210|c1_g1_i2	NODE_36241_length_998_cov_3.31458_ID_1276049	TTTT
TR8210|c1_g1_i2	NODE_36241_length_998_cov_3.31458_ID_1276049	TTTT
TR17284|c0_g2_i1	NODE_36339_length_997_cov_2.59655_ID_1278573	ATAA
TR15182|c0_g4_i1	NODE_36339_length_997_cov_2.59655_ID_1278573	ATAA
TR19440|c0_g1_i1	NODE_36402_length_996_cov_5.21174_ID_1280213	TTGG
TR11595|c0_g1_i1	NODE_3651_length_2466_cov_4.37879_ID_409393	ATAG
TR11595|c0_g8_i1	NODE_3651_length_2466_cov_4.37879_ID_409393	CAAG
TR11595|c0_g3_i1	NODE_3651_length_2466_cov_4.37879_ID_409393	AAAC
TR23397|c2_g1_i1	NODE_36664_length_992_cov_3.8948_ID_1286987	ATCG
TR23397|c2_g1_i3	NODE_36664_length_992_cov_3.8948_ID_1286987	ATTG
TR26795|c0_g1_i1	NODE_36876_length_989_cov_93.7436_ID_2506659	GTTG
TR28741|c0_g1_i1	NODE_36884_length_988_cov_1.25087_ID_1292801	GTAC
TR48046|c0_g1_i1	NODE_36944_length_988_cov_7.79675_ID_1294346	CGAG
TR9517|c0_g3_i1	NODE_36996_length_986_cov_4.5_ID_1295672	CAAA
TR46644|c0_g1_i1	NODE_37121_length_984_cov_3.60606_ID_1298766	GGAG
TR44078|c0_g1_i1	NODE_37371_length_981_cov_0.566745_ID_1305218	GGAA
TR51709|c2_g3_i1	NODE_37455_length_979_cov_4.28136_ID_1307480	CGAC
TR11020|c7_g8_i9	NODE_37500_length_979_cov_1.99413_ID_1308624	GTAC
TR44015|c0_g1_i1	NODE_37531_length_979_cov_2.44836_ID_1309430	GCAC
TR2764|c0_g1_i1	NODE_37572_length_979_cov_2.04343_ID_1310470	GTAT
TR40329|c0_g1_i1	NODE_378_length_4244_cov_4.16246_ID_334019	CTTG
TR41217|c0_g2_i1	NODE_3782_length_2442_cov_4.70972_ID_412637	CTTG
TR15760|c0_g1_i1	NODE_3782_length_2442_cov_4.70972_ID_412637	TTTG
TR42708|c0_g1_i9	NODE_379_length_4243_cov_2.46939_ID_387146	AGAG
TR42708|c0_g1_i3	NODE_379_length_4243_cov_2.46939_ID_387146	AGAG
TR15963|c0_g1_i7	NODE_38395_length_967_cov_11.1738_ID_1331944	ATAT
TR8564|c0_g1_i1	NODE_38546_length_965_cov_0.706444_ID_1335912	ATAT
TR28517|c0_g3_i1	NODE_38605_length_964_cov_3.87216_ID_1337420	TTAA
TR20678|c0_g1_i1	NODE_388_length_4222_cov_4.70499_ID_334175	GAAG
TR3218|c0_g1_i1	NODE_3911_length_2417_cov_4.01397_ID_2730441	CTTC
TR12638|c0_g1_i1	NODE_39152_length_957_cov_7.87229_ID_1351977	CTAA
TR3028|c0_g6_i1	NODE_39266_length_955_cov_1.08816_ID_1355073	CTAA
TR3028|c0_g6_i1	NODE_39266_length_955_cov_1.08816_ID_1355073	CTAA
TR41444|c0_g1_i1	NODE_3930_length_2414_cov_7.20682_ID_416823	CAAG
TR41444|c0_g1_i1	NODE_3930_length_2414_cov_7.20682_ID_416823	TTAC
TR28247|c0_g1_i1	NODE_3931_length_2412_cov_3.47157_ID_1012206	GTCG
TR32995|c0_g1_i3	NODE_39457_length_952_cov_2.89455_ID_1360013	TTAG
TR6661|c0_g1_i1	NODE_39514_length_952_cov_3.47515_ID_1361497	GTAT
TR33252|c0_g1_i1	NODE_39527_length_951_cov_1.31068_ID_1361835	GTAT
TR38677|c3_g6_i11	NODE_39549_length_951_cov_4.08374_ID_1362407	GTAA
TR38677|c3_g6_i6	NODE_39549_length_951_cov_4.08374_ID_1362407	GTAA
TR44011|c0_g1_i1	NODE_39598_length_952_cov_2.92354_ID_1363849	TTCT
TR11346|c0_g1_i1	NODE_3994_length_2404_cov_1.88625_ID_418435	GTAC
TR48538|c0_g7_i7	NODE_39955_length_946_cov_2.84982_ID_1372916	ATAG
TR50117|c0_g1_i1	NODE_4_length_7939_cov_7.59173_ID_597866	CGAG
TR51757|c0_g1_i1	NODE_4_length_7939_cov_7.59173_ID_597866	CTGT
TR819|c3_g6_i4	NODE_4023_length_2397_cov_3.01013_ID_1003528	ATAC
TR38941|c0_g1_i1	NODE_40260_length_941_cov_5.53931_ID_1380718	GCAA
TR21025|c0_g1_i2	NODE_40396_length_939_cov_4.34483_ID_1384362	GGAG
TR21025|c0_g2_i1	NODE_40396_length_939_cov_4.34483_ID_1384362	CAAC
TR15772|c0_g1_i1	NODE_40622_length_936_cov_7.13226_ID_1390424	AGAC
TR15772|c0_g2_i1	NODE_40622_length_936_cov_7.13226_ID_1390424	AGAC
TR31686|c0_g1_i1	NODE_4065_length_2389_cov_4.95579_ID_420257	GAAC
TR23963|c0_g6_i1	NODE_40729_length_933_cov_9.60644_ID_1393419	CAAC
TR19101|c0_g1_i1	NODE_40872_length_933_cov_2.53226_ID_1397061	CAAA
TR19101|c0_g1_i1	NODE_40872_length_933_cov_2.53226_ID_1397061	CAAA
TR19101|c0_g1_i1	NODE_40872_length_933_cov_2.53226_ID_1397061	CAAG
TR40291|c0_g2_i1	NODE_40908_length_932_cov_9.04839_ID_1397997	CCAG
TR12038|c0_g3_i3	NODE_410_length_4173_cov_4.73832_ID_334721	CATG
TR12038|c0_g4_i3	NODE_410_length_4173_cov_4.73832_ID_334721	CATG
TR12038|c0_g4_i3	NODE_410_length_4173_cov_4.73832_ID_334721	CATG
TR12038|c0_g4_i3	NODE_410_length_4173_cov_4.73832_ID_334721	CCAG
TR12038|c0_g4_i1	NODE_410_length_4173_cov_4.73832_ID_334721	CGAG
TR12038|c0_g4_i1	NODE_410_length_4173_cov_4.73832_ID_334721	GCTG
TR17584|c0_g1_i1	NODE_4138_length_2375_cov_5.12544_ID_422183	CCCC
TR17584|c0_g1_i1	NODE_4138_length_2375_cov_5.12544_ID_422183	CTTG
TR33501|c0_g2_i1	NODE_41425_length_925_cov_6.65332_ID_1411737	TGAC
TR12078|c4_g11_i1	NODE_41429_length_926_cov_13.6783_ID_1579386	CAAC
TR45681|c0_g1_i1	NODE_4154_length_2371_cov_2.92424_ID_422547	CGTG
TR8210|c1_g1_i2	NODE_41719_length_922_cov_3.36855_ID_1419101	GCGG
TR8210|c1_g1_i2	NODE_41719_length_922_cov_3.36855_ID_1419101	GCGG
TR1025|c0_g1_i2	NODE_41746_length_921_cov_1.07935_ID_1419933	GCAC
TR20934|c0_g1_i1	NODE_41797_length_919_cov_11.0453_ID_1421313	CAAC
TR20934|c0_g2_i3	NODE_41797_length_919_cov_11.0453_ID_1421313	TTAC
TR8210|c1_g1_i2	NODE_41961_length_919_cov_3.41414_ID_1425627	GTGG
TR12078|c4_g14_i1	NODE_41961_length_919_cov_3.41414_ID_1425627	GTGG
TR31542|c0_g7_i1	NODE_41968_length_917_cov_3.83081_ID_1425809	TTGG
TR31542|c0_g4_i1	NODE_41968_length_917_cov_3.83081_ID_1425809	ATGA
TR39687|c0_g1_i1	NODE_42191_length_916_cov_15.4411_ID_2515836	GGGC
TR10866|c0_g1_i1	NODE_4221_length_2361_cov_9.24082_ID_1123818	CCAC
TR45739|c0_g1_i1	NODE_42277_length_923_cov_4.92259_ID_1433687	CTTC
TR50851|c0_g1_i2	NODE_42409_length_913_cov_3.26463_ID_1437318	CCAC
TR499|c0_g1_i1	NODE_4242_length_2358_cov_3.81533_ID_424837	CCAC
TR737|c0_g1_i1	NODE_42539_length_912_cov_6.60637_ID_1440756	GGAG
TR10942|c0_g8_i1	NODE_42574_length_910_cov_1.03954_ID_1441692	TTAA
TR48156|c0_g1_i1	NODE_4287_length_2350_cov_2.44899_ID_425877	CTTT
TR16715|c0_g1_i1	NODE_43075_length_905_cov_4.0527_ID_1455024	CCAG
TR16715|c0_g1_i2	NODE_43075_length_905_cov_4.0527_ID_1455024	CGGC
TR11301|c0_g1_i2	NODE_43221_length_903_cov_0.764175_ID_1458848	CAAT
TR21712|c0_g1_i1	NODE_43269_length_903_cov_185.265_ID_2534153	GTAA
TR7735|c0_g1_i3	NODE_4352_length_2341_cov_5.43406_ID_427723	TTAT
TR27576|c0_g1_i1	NODE_4362_length_2338_cov_3.25102_ID_428061	CGTG
TR204|c0_g4_i2	NODE_4374_length_2336_cov_1.85967_ID_428477	GGAG
TR755|c0_g1_i2	NODE_4391_length_2333_cov_2.37744_ID_428867	GCGG
TR48552|c0_g6_i3	NODE_43922_length_894_cov_2.60887_ID_1477810	CAAG
TR21712|c0_g1_i1	NODE_4403_length_2332_cov_12.6689_ID_429231	GTAA
TR11579|c0_g1_i2	NODE_442_length_4108_cov_8.12685_ID_335423	CAGC
TR11579|c0_g1_i2	NODE_442_length_4108_cov_8.12685_ID_335423	CAGC
TR11579|c0_g1_i2	NODE_442_length_4108_cov_8.12685_ID_335423	CTAA
TR11579|c0_g1_i1	NODE_442_length_4108_cov_8.12685_ID_335423	CTAA
TR11579|c0_g1_i4	NODE_442_length_4108_cov_8.12685_ID_335423	CTAA
TR29985|c0_g1_i1	NODE_44441_length_884_cov_5.49014_ID_1491186	CAAA
TR43493|c0_g2_i1	NODE_445_length_4102_cov_5.65845_ID_424343	GGAG
TR43493|c0_g1_i1	NODE_445_length_4102_cov_5.65845_ID_424343	TTAG
TR43493|c0_g1_i1	NODE_445_length_4102_cov_5.65845_ID_424343	TTAG
TR37878|c0_g1_i1	NODE_44519_length_887_cov_7.53553_ID_1493136	GAGG
TR21865|c0_g3_i2	NODE_44519_length_887_cov_7.53553_ID_1493136	GAGG
TR18951|c0_g1_i1	NODE_44519_length_887_cov_7.53553_ID_1493136	GAGG
TR37878|c0_g1_i1	NODE_44519_length_887_cov_7.53553_ID_1493136	GAGG
TR43608|c0_g1_i1	NODE_44637_length_885_cov_2.03426_ID_1496404	GTAT
TR12095|c4_g1_i1	NODE_4487_length_2322_cov_3.46901_ID_431319	TTAC
TR11409|c0_g1_i2	NODE_45_length_5957_cov_5.54683_ID_579363	GTGG
TR50429|c0_g2_i1	NODE_45177_length_878_cov_202.139_ID_2660174	CCAC
TR47907|c0_g4_i2	NODE_4532_length_2310_cov_2.65462_ID_432359	ATAA
TR24028|c0_g2_i1	NODE_45339_length_878_cov_3.46072_ID_1515645	GCGC
TR29697|c0_g1_i1	NODE_4548_length_2311_cov_3.57601_ID_432786	GAAG
TR7482|c0_g2_i1	NODE_45535_length_875_cov_0.954545_ID_1520639	ATAG
TR1146|c0_g2_i1	NODE_4573_length_2307_cov_248.018_ID_2642528	CCAC
TR50999|c0_g1_i1	NODE_45834_length_874_cov_1.45772_ID_1528377	CGAG
TR33470|c0_g1_i1	NODE_461_length_4074_cov_2.70636_ID_335683	CAAG
TR38094|c0_g15_i1	NODE_46236_length_868_cov_7.94737_ID_1539084	CAAG
TR38094|c0_g5_i1	NODE_46236_length_868_cov_7.94737_ID_1539084	CAAT
TR26958|c0_g1_i1	NODE_46310_length_867_cov_6.65135_ID_1540960	CGAG
TR24855|c0_g2_i1	NODE_46785_length_861_cov_2.56403_ID_1553980	CGTC
TR21570|c0_g1_i1	NODE_468_length_4064_cov_3.8697_ID_699081	CTTC
TR28605|c0_g1_i1	NODE_46849_length_860_cov_2.15804_ID_1555700	CCAG
TR43077|c0_g1_i1	NODE_47294_length_856_cov_1.97668_ID_1567630	CTTC
TR12078|c4_g7_i1	NODE_477_length_4046_cov_6.10972_ID_388108	TTAC
TR12078|c4_g3_i1	NODE_477_length_4046_cov_6.10972_ID_388108	TTAA
TR40021|c1_g2_i1	NODE_477_length_4046_cov_6.10972_ID_388108	TTAA
TR12078|c4_g3_i1	NODE_477_length_4046_cov_6.10972_ID_388108	TTAA
TR12078|c4_g11_i1	NODE_477_length_4046_cov_6.10972_ID_388108	TTAA
TR12078|c4_g12_i1	NODE_477_length_4046_cov_6.10972_ID_388108	TTAA
TR34914|c0_g1_i1	NODE_4772_length_2277_cov_14.6283_ID_2765144	GCTG
TR737|c0_g2_i6	NODE_478_length_4045_cov_17.6256_ID_335891	AGAA
TR42154|c0_g1_i1	NODE_47839_length_849_cov_4.71823_ID_1582060	GCTG
TR37053|c0_g2_i1	NODE_47967_length_849_cov_4.11496_ID_1585387	GGAG
TR11538|c0_g1_i1	NODE_480_length_4041_cov_8.73659_ID_414043	GGAG
TR23421|c0_g3_i1	NODE_48180_length_847_cov_1.54583_ID_1590821	CCCA
TR21712|c0_g1_i1	NODE_48182_length_847_cov_7.20278_ID_1590847	GATG
TR51628|c0_g2_i2	NODE_482_length_4039_cov_4.22367_ID_2826838	ATAC
TR15561|c0_g1_i1	NODE_4838_length_2268_cov_5.48786_ID_440480	CCAC
TR21634|c0_g1_i1	NODE_48396_length_845_cov_3.64067_ID_1596309	TTTC
TR9003|c1_g6_i1	NODE_48487_length_844_cov_9.22315_ID_1598753	CAAG
TR9003|c1_g4_i1	NODE_48487_length_844_cov_9.22315_ID_1598753	CAAG
TR28415|c0_g1_i1	NODE_4884_length_2263_cov_6.90215_ID_441572	CTTC
TR31253|c0_g2_i4	NODE_4914_length_2259_cov_0.745779_ID_442326	ATTG
TR31253|c0_g2_i5	NODE_4914_length_2259_cov_0.745779_ID_442326	ATAA
TR195|c0_g1_i2	NODE_4925_length_2257_cov_4.57418_ID_442560	ATAC
TR195|c0_g1_i2	NODE_4925_length_2257_cov_4.57418_ID_442560	ATAC
TR195|c0_g1_i2	NODE_4925_length_2257_cov_4.57418_ID_442560	TCAC
TR34716|c0_g1_i1	NODE_4954_length_2254_cov_6.77151_ID_443314	ATGC
TR34716|c0_g1_i2	NODE_4954_length_2254_cov_6.77151_ID_443314	CAGC
TR23253|c1_g3_i2	NODE_4972_length_2251_cov_1.84094_ID_443756	CAAT
TR23253|c1_g3_i2	NODE_4972_length_2251_cov_1.84094_ID_443756	GACG
TR23253|c1_g3_i2	NODE_4972_length_2251_cov_1.84094_ID_443756	CCAG
TR23253|c1_g3_i2	NODE_4972_length_2251_cov_1.84094_ID_443756	CCAT
TR45646|c0_g1_i2	NODE_4978_length_2251_cov_3.14124_ID_443886	GAAG
TR34661|c0_g1_i1	NODE_4996_length_2249_cov_3.04713_ID_444328	CATC
TR15137|c0_g3_i2	NODE_5026_length_2244_cov_7.08357_ID_2461420	ATAG
TR15137|c0_g3_i1	NODE_5026_length_2244_cov_7.08357_ID_2461420	CAAG
TR15137|c0_g5_i1	NODE_5026_length_2244_cov_7.08357_ID_2461420	TTCG
TR19819|c0_g1_i1	NODE_5027_length_2245_cov_9.17989_ID_445056	GGGC
TR29985|c0_g1_i1	NODE_50319_length_829_cov_3.17622_ID_1646840	ATAC
TR23207|c0_g2_i1	NODE_50326_length_825_cov_4.9957_ID_1647100	GTAC
TR10609|c0_g1_i1	NODE_5054_length_2241_cov_3.33333_ID_1056224	TTCG
TR21789|c0_g1_i4	NODE_5060_length_2241_cov_6.37086_ID_944498	CGAT
TR12078|c4_g11_i1	NODE_50649_length_821_cov_3.94236_ID_1655661	ATAC
TR7142|c0_g2_i1	NODE_5104_length_2235_cov_5.95825_ID_447336	CTTC
TR28811|c0_g1_i1	NODE_51159_length_816_cov_4.96807_ID_1669339	GTGG
TR37262|c0_g1_i1	NODE_51245_length_816_cov_2.04797_ID_1671549	CTTC
TR15843|c0_g1_i1	NODE_51290_length_815_cov_9.34302_ID_2418783	AAAC
TR30407|c0_g1_i2	NODE_5149_length_2227_cov_0.854424_ID_448454	CAAC
TR16499|c0_g1_i1	NODE_5166_length_2227_cov_1.87524_ID_448870	TAAG
TR11085|c0_g12_i1	NODE_51715_length_811_cov_5.69152_ID_1684345	GAAG
TR11085|c0_g15_i5	NODE_51715_length_811_cov_5.69152_ID_1684345	CAAC
TR11085|c0_g4_i5	NODE_51715_length_811_cov_5.69152_ID_1684345	CAGC
TR11085|c0_g4_i4	NODE_51715_length_811_cov_5.69152_ID_1684345	CAAC
TR11085|c0_g4_i4	NODE_51715_length_811_cov_5.69152_ID_1684345	CCAA
TR11085|c0_g4_i4	NODE_51715_length_811_cov_5.69152_ID_1684345	CTGG
TR11085|c0_g4_i5	NODE_51715_length_811_cov_5.69152_ID_1684345	CTGG
TR11085|c0_g4_i1	NODE_51715_length_811_cov_5.69152_ID_1684345	CTGG
TR11085|c0_g15_i2	NODE_51715_length_811_cov_5.69152_ID_1684345	CTGG
TR11085|c0_g15_i2	NODE_51715_length_811_cov_5.69152_ID_1684345	TTAG
TR8210|c1_g1_i2	NODE_51806_length_810_cov_10.7526_ID_1686659	GGGG
TR8210|c1_g1_i2	NODE_51806_length_810_cov_10.7526_ID_1686659	GGGG
TR1005|c0_g1_i1	NODE_5194_length_2224_cov_0.837864_ID_449548	GAAG
TR22482|c0_g1_i1	NODE_5213_length_2222_cov_4.02768_ID_450042	GAAG
TR38015|c0_g1_i1	NODE_52176_length_807_cov_19.1794_ID_1696110	TTAC
TR44739|c0_g2_i1	NODE_5246_length_2217_cov_4.43828_ID_451004	CTTC
TR7876|c0_g2_i1	NODE_53061_length_799_cov_2.26975_ID_1720030	CTTC
TR16017|c0_g2_i1	NODE_5324_length_2207_cov_5.96442_ID_452980	CGTG
TR16017|c0_g1_i1	NODE_5324_length_2207_cov_5.96442_ID_452980	GCAC
TR16017|c0_g4_i1	NODE_5324_length_2207_cov_5.96442_ID_452980	GCAC
TR16017|c0_g1_i1	NODE_5324_length_2207_cov_5.96442_ID_452980	GCAC
TR16017|c0_g3_i1	NODE_5324_length_2207_cov_5.96442_ID_452980	GCTG
TR16017|c0_g1_i1	NODE_5324_length_2207_cov_5.96442_ID_452980	CGAC
TR25031|c2_g1_i1	NODE_5327_length_2206_cov_1.55556_ID_453058	CTTC
TR8210|c1_g1_i2	NODE_53298_length_796_cov_9.35725_ID_1726350	GCGG
TR12078|c4_g14_i1	NODE_53298_length_796_cov_9.35725_ID_1726350	CCAT
TR50178|c0_g3_i1	NODE_53573_length_793_cov_127.674_ID_2739761	TTAG
TR50178|c0_g2_i1	NODE_53573_length_793_cov_127.674_ID_2739761	TTAG
TR15182|c0_g4_i1	NODE_53662_length_793_cov_9.30931_ID_1736006	GCTG
TR15182|c0_g4_i1	NODE_53662_length_793_cov_9.30931_ID_1736006	CAGC
TR28871|c0_g2_i1	NODE_53741_length_792_cov_3.75188_ID_1738070	CTGT
TR44022|c0_g1_i1	NODE_5385_length_2197_cov_10.4433_ID_454594	CAAC
TR6691|c0_g3_i2	NODE_5385_length_2197_cov_10.4433_ID_454594	CATG
TR488|c0_g1_i1	NODE_53858_length_790_cov_4.25753_ID_1741090	GTGT
TR51588|c0_g2_i1	NODE_5403_length_2195_cov_8.62977_ID_455062	CGAT
TR21451|c0_g1_i1	NODE_54107_length_779_cov_2.53625_ID_1747360	CGTT
TR21451|c0_g1_i1	NODE_54107_length_779_cov_2.53625_ID_1747360	CGTT
TR4175|c1_g3_i1	NODE_54172_length_788_cov_3.39486_ID_1749128	CGTG
TR28415|c0_g1_i1	NODE_54202_length_788_cov_2.53101_ID_1749910	GTTC
TR45739|c0_g1_i1	NODE_54228_length_788_cov_6.78215_ID_1750534	ATTG
TR25696|c0_g1_i1	NODE_54560_length_785_cov_23.5669_ID_1759466	GGAC
TR246|c3_g5_i1	NODE_5490_length_2185_cov_5.77211_ID_457090	CTTC
TR246|c3_g5_i1	NODE_5490_length_2185_cov_5.77211_ID_457090	CTTC
TR53684|c0_g1_i2	NODE_5517_length_2180_cov_13.4652_ID_2561194	GGTG
TR53684|c0_g1_i1	NODE_5517_length_2180_cov_13.4652_ID_2561194	CGCG
TR13211|c1_g1_i1	NODE_55211_length_778_cov_4.19201_ID_1776773	GAAG
TR26450|c0_g1_i1	NODE_555_length_3894_cov_7.55016_ID_337399	AAAC
TR48471|c0_g2_i1	NODE_5574_length_2173_cov_6.66862_ID_459456	CCAG
TR20948|c0_g1_i1	NODE_5590_length_2171_cov_2.71771_ID_459820	TTAT
TR47382|c0_g1_i1	NODE_564_length_3878_cov_6.85071_ID_601588	TAAG
TR21329|c0_g1_i1	NODE_5649_length_2161_cov_2.11646_ID_461442	CAAA
TR36174|c0_g1_i1	NODE_56900_length_763_cov_1.7551_ID_1821801	GTAC
TR8210|c1_g1_i2	NODE_56942_length_764_cov_3.42386_ID_1822867	GCGG
TR8210|c1_g1_i2	NODE_56942_length_764_cov_3.42386_ID_1822867	GCGG
TR267|c1_g2_i1	NODE_5746_length_2151_cov_6.2337_ID_464092	GCAA
TR38767|c0_g4_i1	NODE_57676_length_758_cov_2.42314_ID_1842472	CATG
TR41598|c0_g1_i1	NODE_57737_length_757_cov_5.83651_ID_1844058	ATAC
TR22948|c0_g1_i1	NODE_579_length_3852_cov_1.99141_ID_337971	ATAC
TR23247|c0_g1_i5	NODE_57924_length_757_cov_2.05246_ID_1848994	GCTG
TR53298|c0_g1_i1	NODE_57924_length_757_cov_2.05246_ID_1848994	GCTG
TR23247|c0_g1_i4	NODE_57924_length_757_cov_2.05246_ID_1848994	GCTG
TR32172|c0_g2_i3	NODE_581_length_3848_cov_7.15825_ID_877020	GCTG
TR15843|c0_g1_i1	NODE_58119_length_754_cov_3.22967_ID_1854199	GTTT
TR17310|c0_g1_i1	NODE_5846_length_2140_cov_4.2767_ID_466807	CTGG
TR28415|c0_g1_i1	NODE_58637_length_750_cov_3.10433_ID_1867633	CTTC
TR31404|c0_g1_i1	NODE_587_length_3842_cov_4.29836_ID_338101	GAAG
TR14402|c0_g1_i1	NODE_58835_length_749_cov_2.78135_ID_1873107	GTAA
TR15147|c0_g1_i2	NODE_5927_length_2130_cov_5.6665_ID_468887	CGAC
TR53034|c0_g2_i1	NODE_594_length_3835_cov_3.71987_ID_338231	CAAT
TR24043|c2_g8_i2	NODE_5949_length_2127_cov_4.0885_ID_469511	CGAG
TR24043|c2_g8_i5	NODE_5949_length_2127_cov_4.0885_ID_469511	CGAT
TR33843|c1_g1_i1	NODE_59519_length_743_cov_2.11364_ID_1891100	TTTC
TR13211|c1_g1_i1	NODE_59654_length_742_cov_7.01626_ID_2654999	AGAC
TR737|c0_g1_i1	NODE_5978_length_2122_cov_2.8021_ID_470265	GGAA
TR5249|c0_g1_i1	NODE_5978_length_2122_cov_2.8021_ID_470265	CGGC
TR49438|c0_g1_i1	NODE_6004_length_2119_cov_2.72992_ID_470967	CATG
TR50860|c0_g1_i1	NODE_6015_length_2118_cov_11.4249_ID_471253	CACG
TR45974|c0_g1_i1	NODE_60283_length_737_cov_1.2377_ID_1911198	GTAT
TR5701|c0_g1_i1	NODE_6030_length_2115_cov_2.96129_ID_471775	CGGG
TR42734|c0_g1_i1	NODE_6030_length_2115_cov_2.96129_ID_471775	GAAG
TR28154|c1_g2_i5	NODE_60352_length_737_cov_50.318_ID_2613597	TTGG
TR25821|c0_g1_i1	NODE_60427_length_736_cov_4.36289_ID_1915161	GTGG
TR52641|c1_g1_i1	NODE_605_length_3815_cov_2.25156_ID_338517	CAAC
TR7477|c0_g10_i1	NODE_6060_length_2112_cov_5.43001_ID_472509	CAAC
TR7477|c0_g10_i1	NODE_6060_length_2112_cov_5.43001_ID_472509	GTAT
TR12078|c4_g14_i1	NODE_60862_length_733_cov_8.32013_ID_1926941	GTAC
TR25059|c1_g3_i4	NODE_6087_length_2111_cov_6.20323_ID_473159	GTGG
TR52046|c0_g1_i2	NODE_6103_length_2108_cov_1.46138_ID_473549	CAAG
TR12078|c4_g11_i1	NODE_61098_length_731_cov_3.93046_ID_1933445	CAAC
TR25696|c0_g1_i1	NODE_61233_length_730_cov_47.8574_ID_2469040	TTAG
TR192|c0_g6_i1	NODE_61363_length_735_cov_3.67276_ID_1940261	ATAG
TR192|c0_g8_i1	NODE_61363_length_735_cov_3.67276_ID_1940261	ATAG
TR192|c0_g9_i1	NODE_61363_length_735_cov_3.67276_ID_1940261	ATAG
TR192|c0_g4_i1	NODE_61363_length_735_cov_3.67276_ID_1940261	ATAC
TR192|c0_g10_i1	NODE_61363_length_735_cov_3.67276_ID_1940261	CAAC
TR192|c0_g9_i1	NODE_61363_length_735_cov_3.67276_ID_1940261	CAAC
TR192|c0_g9_i1	NODE_61363_length_735_cov_3.67276_ID_1940261	CAAC
TR192|c0_g10_i1	NODE_61363_length_735_cov_3.67276_ID_1940261	TGAC
TR1178|c0_g4_i1	NODE_6150_length_2102_cov_1.76911_ID_474719	CTAA
TR488|c0_g1_i1	NODE_616_length_3798_cov_23.8464_ID_338725	GTTG
TR46985|c1_g4_i3	NODE_61635_length_727_cov_7.41833_ID_1947429	GGCG
TR28527|c0_g1_i1	NODE_617_length_3795_cov_2.22976_ID_338751	CAAG
TR12078|c4_g7_i1	NODE_61896_length_725_cov_3.2408_ID_1954257	TTAC
TR12078|c4_g3_i1	NODE_61896_length_725_cov_3.2408_ID_1954257	TTAC
TR40021|c1_g2_i1	NODE_61896_length_725_cov_3.2408_ID_1954257	TTAC
TR12078|c4_g3_i1	NODE_61896_length_725_cov_3.2408_ID_1954257	TTAC
TR12078|c4_g10_i1	NODE_61896_length_725_cov_3.2408_ID_1954257	TTAC
TR12078|c4_g12_i1	NODE_61896_length_725_cov_3.2408_ID_1954257	TTAC
TR40508|c0_g4_i1	NODE_6190_length_2098_cov_8.09082_ID_475811	GACG
TR40508|c0_g2_i1	NODE_6190_length_2098_cov_8.09082_ID_475811	GTCG
TR40508|c0_g3_i1	NODE_6190_length_2098_cov_8.09082_ID_475811	GTCG
TR40508|c0_g5_i1	NODE_6190_length_2098_cov_8.09082_ID_475811	GTCG
TR40508|c0_g1_i1	NODE_6190_length_2098_cov_8.09082_ID_475811	GTCG
TR40508|c0_g6_i1	NODE_6190_length_2098_cov_8.09082_ID_475811	CAAT
TR30928|c0_g1_i1	NODE_6202_length_2095_cov_2.92893_ID_476123	TTGG
TR12078|c4_g11_i1	NODE_62031_length_724_cov_3.11893_ID_1957938	CAAC
TR768|c5_g7_i1	NODE_62183_length_723_cov_5.97987_ID_1961946	CTTC
TR12162|c0_g1_i1	NODE_622_length_3787_cov_4.07705_ID_569046	CGTG
TR8239|c0_g1_i1	NODE_62222_length_723_cov_4.43456_ID_1963144	GGAC
TR8239|c0_g1_i1	NODE_62222_length_723_cov_4.43456_ID_1963144	GGAC
TR25347|c0_g1_i1	NODE_62464_length_721_cov_2.08081_ID_1969412	TTAC
TR49894|c0_g2_i1	NODE_6252_length_2091_cov_16.0005_ID_477433	TTAT
TR41409|c0_g1_i1	NODE_626_length_3784_cov_4.43998_ID_836600	GAAG
TR15843|c0_g1_i1	NODE_62830_length_718_cov_4.57191_ID_1979458	CCAC
TR8210|c1_g1_i2	NODE_63375_length_714_cov_6.96599_ID_1993629	CGTC
TR8210|c1_g1_i2	NODE_63375_length_714_cov_6.96599_ID_1993629	CGTC
TR50256|c0_g1_i1	NODE_63468_length_714_cov_10.1158_ID_1996075	CGAC
TR39666|c0_g1_i1	NODE_64258_length_709_cov_16.2595_ID_2017214	GTAA
TR43746|c0_g1_i1	NODE_643_length_3765_cov_2.78972_ID_339115	CGGG
TR2965|c0_g17_i1	NODE_64570_length_707_cov_23.1897_ID_2525797	CACC
TR41234|c0_g3_i2	NODE_6459_length_2069_cov_5.1725_ID_483053	GTGT
TR28415|c0_g1_i1	NODE_64976_length_704_cov_4.78856_ID_2035471	CTTC
TR23784|c0_g1_i2	NODE_6499_length_2060_cov_2.85088_ID_484159	GAAC
TR23784|c0_g1_i2	NODE_6499_length_2060_cov_2.85088_ID_484159	GTAC
TR52870|c0_g4_i5	NODE_65025_length_704_cov_16.6759_ID_2829986	GTGT
TR268|c0_g1_i1	NODE_6519_length_2063_cov_13.4246_ID_484757	CAAC
TR246|c3_g7_i1	NODE_659_length_3750_cov_5.59923_ID_339453	CTTC
TR14125|c0_g1_i1	NODE_66025_length_697_cov_3.91053_ID_2062714	TTAC
TR14125|c0_g1_i1	NODE_66025_length_697_cov_3.91053_ID_2062714	TTAC
TR43608|c0_g1_i1	NODE_6632_length_2050_cov_5.52834_ID_487890	CCAC
TR43608|c0_g1_i1	NODE_6632_length_2050_cov_5.52834_ID_487890	CCAC
TR28517|c0_g1_i1	NODE_66591_length_694_cov_8.2328_ID_2077616	GTGG
TR3587|c0_g1_i1	NODE_66604_length_693_cov_1.41696_ID_2078068	ATAC
TR23978|c1_g3_i3	NODE_6671_length_2045_cov_9.75769_ID_488861	CTTC
TR23978|c1_g3_i3	NODE_6671_length_2045_cov_9.75769_ID_488861	ATAT
TR23978|c1_g3_i6	NODE_6671_length_2045_cov_9.75769_ID_488861	CTTC
TR23978|c1_g3_i6	NODE_6671_length_2045_cov_9.75769_ID_488861	ATAT
TR4403|c0_g1_i1	NODE_6691_length_2044_cov_4.88732_ID_489381	CCAC
TR590|c0_g2_i6	NODE_66922_length_691_cov_6.40071_ID_2086496	GAAG
TR11915|c0_g2_i1	NODE_6693_length_2042_cov_6.0699_ID_489433	CTTC
TR11915|c0_g1_i1	NODE_6693_length_2042_cov_6.0699_ID_489433	GTTC
TR52898|c0_g1_i1	NODE_6712_length_2040_cov_3.86364_ID_490039	ATAG
TR52898|c0_g1_i2	NODE_6712_length_2040_cov_3.86364_ID_490039	AGAC
TR12376|c0_g2_i1	NODE_6742_length_2038_cov_3.97488_ID_490741	GACG
TR6201|c0_g2_i1	NODE_6748_length_2037_cov_3.49529_ID_2755691	CTTC
TR5516|c0_g6_i1	NODE_67521_length_688_cov_7.31551_ID_2102454	GTGT
TR30710|c0_g1_i3	NODE_6802_length_2032_cov_2.7723_ID_492327	CAAG
TR30710|c0_g1_i3	NODE_6802_length_2032_cov_2.7723_ID_492327	CAAG
TR50465|c0_g1_i1	NODE_68054_length_685_cov_12.0789_ID_2116528	ATAC
TR28232|c0_g1_i1	NODE_6819_length_2031_cov_5.84559_ID_492717	ATCG
TR28232|c0_g1_i2	NODE_6819_length_2031_cov_5.84559_ID_492717	ATCG
TR28232|c0_g1_i2	NODE_6819_length_2031_cov_5.84559_ID_492717	GTAT
TR8210|c1_g1_i2	NODE_68482_length_683_cov_4.18378_ID_2127918	GCGG
TR8532|c0_g1_i1	NODE_6858_length_2027_cov_2.21632_ID_493819	GTAT
TR42907|c0_g1_i5	NODE_687_length_3724_cov_3.38643_ID_339926	GTAC
TR242|c2_g1_i2	NODE_690_length_3718_cov_9.90727_ID_339978	ATAG
TR39687|c0_g1_i1	NODE_69364_length_677_cov_3.23273_ID_2151327	GGGC
TR28238|c0_g8_i1	NODE_69366_length_677_cov_3.11818_ID_2151379	GAAG
TR28238|c0_g9_i1	NODE_69366_length_677_cov_3.11818_ID_2151379	GTTG
TR28238|c0_g7_i1	NODE_69366_length_677_cov_3.11818_ID_2151379	GTTG
TR28238|c0_g10_i3	NODE_69366_length_677_cov_3.11818_ID_2151379	GTTG
TR28238|c0_g10_i2	NODE_69366_length_677_cov_3.11818_ID_2151379	TTGG
TR2891|c0_g1_i1	NODE_6947_length_2019_cov_4.76903_ID_496081	CTTC
TR11056|c0_g2_i4	NODE_695_length_3707_cov_5.726_ID_340218	ATAA
TR11056|c0_g2_i4	NODE_695_length_3707_cov_5.726_ID_340218	CTAA
TR40551|c0_g1_i1	NODE_69809_length_674_cov_2.3894_ID_2163083	TTAT
TR4261|c0_g1_i1	NODE_7006_length_2013_cov_2.43372_ID_497563	CCAG
TR25821|c0_g1_i1	NODE_70331_length_671_cov_14.8842_ID_2479983	GTGC
TR25649|c0_g1_i8	NODE_7041_length_2009_cov_6.61445_ID_2450537	GCAA
TR2491|c0_g2_i1	NODE_7064_length_2007_cov_2.42371_ID_499071	GTTG
TR32506|c0_g1_i1	NODE_7070_length_2007_cov_3.05106_ID_499227	ACAC
TR31686|c0_g1_i1	NODE_71024_length_667_cov_31.7667_ID_2445192	TTCG
TR12078|c4_g7_i1	NODE_71158_length_666_cov_2.23006_ID_2199259	GTTG
TR12078|c4_g3_i1	NODE_71158_length_666_cov_2.23006_ID_2199259	GTTG
TR40021|c1_g2_i1	NODE_71158_length_666_cov_2.23006_ID_2199259	GTTG
TR12078|c4_g3_i1	NODE_71158_length_666_cov_2.23006_ID_2199259	GTTG
TR12078|c4_g10_i1	NODE_71158_length_666_cov_2.23006_ID_2199259	GTTG
TR12078|c4_g12_i1	NODE_71158_length_666_cov_2.23006_ID_2199259	GTTG
TR52669|c0_g1_i1	NODE_714_length_3684_cov_4.75561_ID_340582	GTAC
TR38718|c1_g1_i3	NODE_7150_length_1997_cov_3.38281_ID_501389	GTCG
TR30446|c0_g1_i1	NODE_716_length_3688_cov_4.89444_ID_340634	TTAG
TR27401|c0_g1_i1	NODE_718_length_3689_cov_5.25239_ID_340686	GTCC
TR33340|c2_g1_i3	NODE_7184_length_1997_cov_11.1048_ID_502195	GTTG
TR38333|c0_g1_i1	NODE_72015_length_661_cov_5.94007_ID_2222276	GTGG
TR38333|c0_g1_i1	NODE_72015_length_661_cov_5.94007_ID_2222276	GTGG
TR26008|c0_g1_i1	NODE_72022_length_663_cov_2.66667_ID_2222458	TCAG
TR29985|c0_g1_i1	NODE_7223_length_1994_cov_2.81789_ID_503131	AAGG
TR4930|c0_g1_i1	NODE_72435_length_659_cov_27.1936_ID_2601403	CAAG
TR27309|c0_g1_i1	NODE_7285_length_1987_cov_2.81462_ID_504691	GAAG
TR36103|c0_g1_i1	NODE_73043_length_655_cov_1.73106_ID_2249908	CTTC
TR26019|c0_g2_i1	NODE_7309_length_1986_cov_3.76977_ID_505315	CCAC
TR33004|c1_g2_i1	NODE_73230_length_653_cov_5.49146_ID_2254786	CTTG
TR33004|c1_g3_i4	NODE_73230_length_653_cov_5.49146_ID_2254786	CTTG
TR33004|c1_g3_i4	NODE_73230_length_653_cov_5.49146_ID_2254786	GTGG
TR33004|c1_g3_i4	NODE_73230_length_653_cov_5.49146_ID_2254786	TGTG
TR208|c2_g16_i3	NODE_73291_length_654_cov_4.54459_ID_2256320	GTTG
TR12277|c0_g1_i1	NODE_7344_length_1982_cov_3.39677_ID_506251	CCAG
TR12277|c0_g2_i1	NODE_7344_length_1982_cov_3.39677_ID_506251	CCAG
TR1243|c0_g1_i1	NODE_73457_length_653_cov_32.0837_ID_2435012	ATCC
TR15450|c0_g1_i1	NODE_73693_length_652_cov_20.4971_ID_2466582	ATGC
TR32734|c0_g2_i1	NODE_73717_length_651_cov_2.81298_ID_2267578	CGAC
TR13211|c1_g1_i1	NODE_73958_length_650_cov_2.67113_ID_2274069	AGAC
TR23340|c0_g1_i1	NODE_74_length_5607_cov_6.41679_ID_328763	TTAG
TR44426|c0_g1_i1	NODE_7406_length_1976_cov_13.4_ID_2506842	GCAC
TR5189|c0_g2_i1	NODE_74167_length_650_cov_2.2682_ID_2279857	GTTG
TR28415|c0_g1_i1	NODE_74529_length_647_cov_3.95769_ID_2289457	CTTC
TR25034|c1_g1_i1	NODE_746_length_3655_cov_2.74936_ID_341206	CAAG
TR25034|c1_g1_i1	NODE_746_length_3655_cov_2.74936_ID_341206	CTTG
TR25034|c1_g1_i1	NODE_746_length_3655_cov_2.74936_ID_341206	GTCT
TR18951|c0_g1_i1	NODE_75094_length_644_cov_1.29981_ID_2304411	TTAG
TR3005|c1_g1_i1	NODE_75094_length_644_cov_1.29981_ID_2304411	TTAG
TR21548|c0_g1_i1	NODE_75349_length_643_cov_3.28488_ID_2311675	AGAA
TR21548|c0_g1_i1	NODE_75349_length_643_cov_3.28488_ID_2311675	CAAC
TR50178|c0_g2_i1	NODE_7538_length_1964_cov_6.00817_ID_511297	TTAG
TR50178|c0_g2_i1	NODE_7538_length_1964_cov_6.00817_ID_511297	TTAG
TR39687|c0_g1_i1	NODE_75400_length_642_cov_7.33981_ID_2313203	GACT
TR831|c0_g3_i3	NODE_75551_length_642_cov_7.02913_ID_2392015	ATAG
TR28415|c0_g1_i1	NODE_75679_length_641_cov_7.67899_ID_2320689	CTTC
TR51280|c0_g1_i1	NODE_76256_length_637_cov_1.96078_ID_2335893	GGTG
TR1177|c0_g1_i4	NODE_764_length_3640_cov_6.89667_ID_577354	CTAA
TR1177|c0_g1_i7	NODE_764_length_3640_cov_6.89667_ID_577354	GTAA
TR1177|c0_g1_i7	NODE_764_length_3640_cov_6.89667_ID_577354	NTAA
TR24026|c1_g4_i8	NODE_7654_length_1952_cov_2.35413_ID_514321	TTAA
TR21565|c0_g1_i1	NODE_7664_length_1949_cov_5.32256_ID_514581	CGAG
TR3058|c1_g4_i1	NODE_76848_length_635_cov_1.33333_ID_2345074	GTGG
TR24019|c0_g3_i1	NODE_76907_length_634_cov_0.238659_ID_2345923	CGCG
TR29205|c1_g1_i2	NODE_77_length_5568_cov_5.12645_ID_444432	CTNN
TR36770|c0_g1_i1	NODE_77087_length_633_cov_1.22727_ID_2348604	CCAC
TR16825|c0_g2_i1	NODE_7712_length_1949_cov_5.53513_ID_515777	GTAC
TR17575|c0_g1_i1	NODE_77159_length_633_cov_4.42688_ID_2349716	TTAA
TR39946|c0_g1_i2	NODE_77239_length_632_cov_2.89901_ID_2350925	GCGT
TR27427|c0_g1_i8	NODE_778_length_3630_cov_6.97459_ID_2394368	ATAG
TR27427|c0_g1_i7	NODE_778_length_3630_cov_6.97459_ID_2394368	ATAG
TR27427|c0_g1_i2	NODE_778_length_3630_cov_6.97459_ID_2394368	ATAG
TR37206|c0_g1_i1	NODE_78036_length_628_cov_1.86427_ID_2362492	GTGT
TR28968|c0_g2_i1	NODE_78222_length_627_cov_12.614_ID_2640659	GTCT
TR30326|c0_g1_i1	NODE_78292_length_626_cov_4.8_ID_2366789	TTGG
TR38384|c0_g1_i1	NODE_7838_length_1937_cov_5.58177_ID_519133	TACG
TR50989|c0_g1_i1	NODE_78410_length_626_cov_7.89178_ID_2368464	CAAG
TR38939|c0_g1_i1	NODE_78428_length_626_cov_1.67535_ID_2368754	CAGG
TR2987|c0_g5_i1	NODE_786_length_3618_cov_5.90836_ID_341934	GCAA
TR27591|c0_g1_i1	NODE_7909_length_1928_cov_2.18469_ID_520799	CTTC
TR40149|c0_g1_i1	NODE_792_length_3605_cov_6.58955_ID_342064	GTAA
TR11080|c0_g2_i2	NODE_7929_length_1928_cov_1.35813_ID_521423	TTAG
TR22752|c1_g1_i1	NODE_7973_length_1927_cov_3.32258_ID_522567	CCGC
TR15936|c0_g1_i1	NODE_7989_length_1924_cov_10.6878_ID_523009	CTTT
TR35265|c0_g1_i1	NODE_80_length_5554_cov_13.4098_ID_1001099	GAAG
TR48045|c0_g1_i1	NODE_80240_length_598_cov_6.04671_ID_2378329	GGAG
TR12341|c0_g1_i1	NODE_8027_length_1919_cov_2.30636_ID_524187	CTTC
TR12078|c4_g7_i1	NODE_80389_length_592_cov_102.647_ID_2723428	GAAG
TR40021|c1_g2_i1	NODE_80389_length_592_cov_102.647_ID_2723428	GAAG
TR1166|c0_g2_i1	NODE_8044_length_1918_cov_4.22166_ID_524681	CTAA
TR1166|c0_g2_i1	NODE_8044_length_1918_cov_4.22166_ID_524681	AGAG
TR28811|c0_g1_i1	NODE_8044_length_1918_cov_4.22166_ID_524681	AGAG
TR28015|c0_g1_i1	NODE_8049_length_1918_cov_9.18314_ID_524837	GTGC
TR24882|c0_g1_i1	NODE_80746_length_578_cov_34.4146_ID_2574517	GTAT
TR642|c0_g2_i1	NODE_8098_length_1914_cov_1.91158_ID_526033	CAAG
TR12078|c4_g12_i1	NODE_81187_length_562_cov_5.3908_ID_2386609	GTCC
TR29030|c0_g1_i1	NODE_81206_length_561_cov_14.4539_ID_2647811	ATTC
TR32130|c0_g1_i3	NODE_8143_length_1911_cov_6.6093_ID_527281	ATAG
TR13131|c0_g3_i1	NODE_81461_length_554_cov_3.71663_ID_2388676	GGAG
TR29471|c0_g1_i1	NODE_81913_length_540_cov_8.20339_ID_2660052	CAAG
TR27653|c0_g1_i1	NODE_82030_length_537_cov_6.07073_ID_2392949	TTAT
TR24793|c0_g1_i3	NODE_8231_length_1903_cov_6.44063_ID_1820239	AAAC
TR45940|c0_g1_i1	NODE_82508_length_521_cov_6.94924_ID_2397193	CGAA
TR21634|c0_g1_i1	NODE_82692_length_515_cov_8.21649_ID_2398649	CTGG
TR32965|c1_g1_i1	NODE_827_length_3583_cov_8.0735_ID_342818	TTAC
TR569|c0_g5_i2	NODE_82728_length_514_cov_4.03618_ID_2828730	CAAG
TR29030|c0_g1_i1	NODE_83443_length_490_cov_100.697_ID_2502047	ATCC
TR52871|c0_g2_i1	NODE_835_length_3575_cov_3.81826_ID_342974	CGAC
TR52871|c0_g2_i1	NODE_835_length_3575_cov_3.81826_ID_342974	CGAC
TR52871|c0_g2_i2	NODE_835_length_3575_cov_3.81826_ID_342974	CGCA
TR52871|c0_g2_i2	NODE_835_length_3575_cov_3.81826_ID_342974	CGCA
TR52871|c0_g2_i3	NODE_835_length_3575_cov_3.81826_ID_342974	CGAC
TR52871|c0_g2_i3	NODE_835_length_3575_cov_3.81826_ID_342974	CGAC
TR52871|c0_g2_i3	NODE_835_length_3575_cov_3.81826_ID_342974	CGCA
TR52871|c0_g2_i1	NODE_835_length_3575_cov_3.81826_ID_342974	CGAC
TR52871|c0_g2_i1	NODE_835_length_3575_cov_3.81826_ID_342974	GTGC
TR52871|c0_g2_i2	NODE_835_length_3575_cov_3.81826_ID_342974	GTGC
TR52871|c0_g2_i3	NODE_835_length_3575_cov_3.81826_ID_342974	GTGC
TR52871|c0_g2_i3	NODE_835_length_3575_cov_3.81826_ID_342974	GTGC
TR52871|c0_g2_i3	NODE_835_length_3575_cov_3.81826_ID_342974	GTGC
TR52871|c0_g2_i4	NODE_835_length_3575_cov_3.81826_ID_342974	GTGC
TR52871|c0_g2_i4	NODE_835_length_3575_cov_3.81826_ID_342974	GTGC
TR52871|c0_g2_i4	NODE_835_length_3575_cov_3.81826_ID_342974	GTGC
TR42918|c0_g1_i1	NODE_836_length_3577_cov_4.0371_ID_343000	TTAG
TR8988|c3_g1_i1	NODE_836_length_3577_cov_4.0371_ID_343000	TTAG
TR14315|c0_g1_i1	NODE_83887_length_476_cov_6.66476_ID_2407934	CTGG
TR43608|c0_g1_i1	NODE_84134_length_468_cov_5.7478_ID_2409520	GAAG
TR25696|c0_g1_i1	NODE_84281_length_464_cov_2.80119_ID_2410831	CTAA
TR32734|c0_g2_i1	NODE_8465_length_1884_cov_4.83836_ID_535739	CCTG
TR7558|c0_g1_i1	NODE_8467_length_1882_cov_2.60785_ID_535791	GGTA
TR30551|c0_g2_i1	NODE_8467_length_1882_cov_2.60785_ID_535791	GGTA
TR30551|c0_g1_i1	NODE_8467_length_1882_cov_2.60785_ID_535791	CTTC
TR29030|c0_g1_i1	NODE_84820_length_447_cov_17.3313_ID_2690079	ATTC
TR53328|c0_g2_i2	NODE_8501_length_1880_cov_8.56874_ID_536731	GGGC
TR53328|c0_g1_i1	NODE_8501_length_1880_cov_8.56874_ID_536731	TTAT
TR15621|c0_g1_i2	NODE_8551_length_1877_cov_3.10286_ID_538115	GCTG
TR25821|c0_g1_i1	NODE_85562_length_425_cov_17.4147_ID_2420853	TTTG
TR52046|c0_g1_i2	NODE_85818_length_419_cov_2.2774_ID_2422323	GGGG
TR52046|c0_g1_i2	NODE_85818_length_419_cov_2.2774_ID_2422323	GGGG
TR28558|c0_g1_i1	NODE_85818_length_419_cov_2.2774_ID_2422323	GGGG
TR19487|c0_g1_i1	NODE_862_length_3556_cov_4.58005_ID_343520	CTTC
TR17079|c0_g2_i1	NODE_8661_length_1868_cov_4.17174_ID_540931	GTGG
TR17079|c0_g1_i1	NODE_8661_length_1868_cov_4.17174_ID_540931	GTTG
TR40092|c0_g2_i4	NODE_8671_length_1867_cov_9.89655_ID_541269	TTGG
TR40092|c0_g2_i4	NODE_8671_length_1867_cov_9.89655_ID_541269	TTGG
TR40944|c0_g1_i1	NODE_8682_length_1867_cov_1.43473_ID_541607	ATAG
TR7251|c0_g1_i2	NODE_8685_length_1864_cov_4.72455_ID_541685	ATAG
TR32180|c3_g10_i1	NODE_87195_length_383_cov_2.48828_ID_2433784	CCAG
TR32180|c3_g7_i2	NODE_87195_length_383_cov_2.48828_ID_2433784	CCAG
TR12031|c0_g1_i1	NODE_87195_length_383_cov_2.48828_ID_2433784	CCAG
TR12031|c0_g1_i1	NODE_87195_length_383_cov_2.48828_ID_2433784	CCAG
TR12031|c0_g3_i1	NODE_87195_length_383_cov_2.48828_ID_2433784	CCAG
TR32180|c3_g10_i2	NODE_87195_length_383_cov_2.48828_ID_2433784	CCAG
TR14125|c0_g1_i1	NODE_87316_length_380_cov_2.68379_ID_2434919	TTAC
TR28238|c0_g10_i2	NODE_87342_length_380_cov_6.7668_ID_2435055	CCTC
TR24048|c0_g4_i1	NODE_8753_length_1861_cov_3.63956_ID_543349	AGAG
TR24048|c0_g8_i1	NODE_8753_length_1861_cov_3.63956_ID_543349	AGAG
TR24048|c0_g8_i1	NODE_8753_length_1861_cov_3.63956_ID_543349	CTGG
TR24048|c0_g1_i1	NODE_8753_length_1861_cov_3.63956_ID_543349	CTGG
TR24048|c0_g8_i3	NODE_8753_length_1861_cov_3.63956_ID_543349	CTGG
TR24048|c0_g8_i3	NODE_8753_length_1861_cov_3.63956_ID_543349	GCAC
TR24048|c0_g8_i3	NODE_8753_length_1861_cov_3.63956_ID_543349	GTGG
TR24048|c0_g8_i1	NODE_8753_length_1861_cov_3.63956_ID_543349	GTGG
TR24048|c0_g8_i1	NODE_8753_length_1861_cov_3.63956_ID_543349	GTGG
TR24048|c0_g8_i3	NODE_8753_length_1861_cov_3.63956_ID_543349	GTGG
TR24048|c0_g8_i1	NODE_8753_length_1861_cov_3.63956_ID_543349	GTGG
TR24048|c0_g8_i1	NODE_8753_length_1861_cov_3.63956_ID_543349	CTGG
TR24048|c0_g8_i1	NODE_8753_length_1861_cov_3.63956_ID_543349	CTGG
TR8210|c1_g1_i2	NODE_87699_length_371_cov_11.3811_ID_2438126	GCGG
TR34432|c0_g1_i1	NODE_87906_length_366_cov_1.5523_ID_2439860	CAAG
TR48538|c0_g3_i1	NODE_8798_length_1859_cov_4.6224_ID_544472	ATAG
TR31273|c0_g2_i4	NODE_88_length_5466_cov_11.0862_ID_510699	GAAA
TR31515|c0_g1_i5	NODE_8808_length_1858_cov_7.47949_ID_544812	CAAC
TR31515|c0_g1_i5	NODE_8808_length_1858_cov_7.47949_ID_544812	CAGG
TR48381|c0_g1_i1	NODE_89_length_5462_cov_4.37563_ID_333081	GGAC
TR11055|c1_g7_i1	NODE_8946_length_1847_cov_4.28937_ID_548444	CTTT
TR51006|c0_g2_i1	NODE_903_length_3505_cov_7.75784_ID_344328	CTTC
TR23318|c0_g1_i2	NODE_90697_length_313_cov_6.16667_ID_2463078	GTCG
TR21712|c0_g1_i1	NODE_9119_length_1835_cov_14.8273_ID_553074	TTAC
TR8210|c1_g1_i2	NODE_91407_length_302_cov_20.72_ID_2468983	GCGG
TR8210|c1_g1_i2	NODE_91407_length_302_cov_20.72_ID_2468983	GCGG
TR25046|c0_g1_i2	NODE_9153_length_1832_cov_1.6868_ID_554036	GGAG
TR23318|c0_g1_i2	NODE_91576_length_299_cov_1.11628_ID_2828908	GTCG
TR8210|c1_g1_i2	NODE_92501_length_287_cov_11.0938_ID_2476415	GCGG
TR29932|c0_g2_i1	NODE_926_length_3481_cov_8.28878_ID_935732	GTAT
TR24063|c0_g1_i1	NODE_9312_length_1827_cov_4.42267_ID_558144	CTAA
TR23318|c0_g1_i2	NODE_93208_length_279_cov_2.85526_ID_2481343	GTCG
TR208|c1_g4_i1	NODE_9325_length_1819_cov_1.68144_ID_558560	ATAC
TR208|c1_g4_i1	NODE_9325_length_1819_cov_1.68144_ID_558560	ATAC
TR208|c1_g4_i1	NODE_9325_length_1819_cov_1.68144_ID_558560	ATAC
TR208|c2_g8_i1	NODE_9325_length_1819_cov_1.68144_ID_558560	ATAC
TR208|c2_g8_i1	NODE_9325_length_1819_cov_1.68144_ID_558560	ATAC
TR208|c2_g8_i1	NODE_9325_length_1819_cov_1.68144_ID_558560	ATAC
TR208|c2_g8_i1	NODE_9325_length_1819_cov_1.68144_ID_558560	TGAC
TR208|c2_g8_i1	NODE_9325_length_1819_cov_1.68144_ID_558560	TGAC
TR208|c2_g8_i1	NODE_9325_length_1819_cov_1.68144_ID_558560	TGAC
TR30481|c0_g1_i1	NODE_93308_length_277_cov_8.09333_ID_2481795	GGAG
TR14089|c0_g2_i1	NODE_9358_length_1817_cov_7.58402_ID_2488966	CGCG
TR21823|c0_g9_i4	NODE_941_length_3477_cov_11.1168_ID_345030	GTAT
TR21823|c0_g9_i4	NODE_941_length_3477_cov_11.1168_ID_345030	GTCT
TR21823|c0_g9_i4	NODE_941_length_3477_cov_11.1168_ID_345030	GTTT
TR21823|c0_g9_i4	NODE_941_length_3477_cov_11.1168_ID_345030	GTTT
TR6474|c0_g1_i1	NODE_941_length_3477_cov_11.1168_ID_345030	GTTT
TR23318|c0_g1_i2	NODE_94235_length_268_cov_1.58865_ID_2487207	GTCG
TR8382|c0_g1_i1	NODE_9481_length_1809_cov_4.57907_ID_562540	GTCG
TR33448|c0_g1_i1	NODE_9482_length_1794_cov_5.24792_ID_562566	GACC
TR36923|c0_g2_i1	NODE_9600_length_1799_cov_2.29827_ID_565818	CGAC
TR16288|c0_g1_i6	NODE_961_length_3460_cov_9.59622_ID_345576	ATCG
TR42310|c0_g1_i3	NODE_9628_length_1798_cov_11.2537_ID_566520	CCAG
TR32095|c0_g1_i2	NODE_965_length_3455_cov_3.064_ID_345680	CAAG
TR27119|c0_g1_i1	NODE_97_length_5377_cov_5.89373_ID_367572	ATAG
TR5510|c0_g4_i1	NODE_9758_length_1790_cov_6.69814_ID_570216	CAAG
TR18660|c0_g1_i1	NODE_9814_length_1782_cov_2.98794_ID_571780	GGAG
TR30775|c3_g2_i3	NODE_9878_length_1782_cov_1.40604_ID_573314	CCAG
TR33734|c2_g1_i1	NODE_9882_length_1782_cov_4.62054_ID_573418	AATG
TR33734|c2_g1_i3	NODE_9882_length_1782_cov_4.62054_ID_573418	TTAG
TR1645|c0_g1_i1	NODE_9882_length_1782_cov_4.62054_ID_573418	ATTC
TR6255|c0_g1_i1	NODE_9887_length_1782_cov_4.51299_ID_573574	TTTG
TR19971|c0_g1_i1	NODE_990_length_3434_cov_11.6853_ID_346226	GGAG
TR3437|c0_g1_i1	NODE_99517_length_249_cov_1.52459_ID_2538185	GTTG
TR46644|c0_g1_i1	NODE_9998_length_1775_cov_9.09284_ID_737705	GGAG

## Sheet: Table S4
Genome contig ID
NODE_4_length_7939_cov_7.59173_ID_597866
NODE_225_length_4685_cov_4.75581_ID_331183
NODE_468_length_4064_cov_3.8697_ID_699081
NODE_564_length_3878_cov_6.85071_ID_601588
NODE_587_length_3842_cov_4.29836_ID_338101
NODE_581_length_3848_cov_7.15825_ID_877020
NODE_626_length_3784_cov_4.43998_ID_836600
NODE_643_length_3765_cov_2.78972_ID_339115
NODE_659_length_3750_cov_5.59923_ID_339453
NODE_718_length_3689_cov_5.25239_ID_340686
NODE_941_length_3477_cov_11.1168_ID_345030
NODE_990_length_3434_cov_11.6853_ID_346226
NODE_1138_length_3340_cov_5.3159_ID_349398
NODE_1935_length_2936_cov_0.219651_ID_367149
NODE_2127_length_2859_cov_3.40922_ID_371812
NODE_2364_length_2777_cov_5.73369_ID_377645
NODE_2441_length_2752_cov_8.47695_ID_379387
NODE_2694_length_2676_cov_4.30902_ID_385482
NODE_2899_length_2625_cov_2.21898_ID_390604
NODE_3039_length_2590_cov_4.29261_ID_394014
NODE_2839_length_2637_cov_4.96616_ID_493689
NODE_3314_length_2540_cov_7.71269_ID_400566
NODE_3443_length_2510_cov_1.91481_ID_403712
NODE_3575_length_2483_cov_2.99278_ID_407120
NODE_4154_length_2371_cov_2.92424_ID_422547
NODE_4287_length_2350_cov_2.44899_ID_425877
NODE_4352_length_2341_cov_5.43406_ID_427723
NODE_4362_length_2338_cov_3.25102_ID_428061
NODE_4487_length_2322_cov_3.46901_ID_431319
NODE_4838_length_2268_cov_5.48786_ID_440480
NODE_4925_length_2257_cov_4.57418_ID_442560
NODE_4954_length_2254_cov_6.77151_ID_443314
NODE_5060_length_2241_cov_6.37086_ID_944498
NODE_5194_length_2224_cov_0.837864_ID_449548
NODE_5327_length_2206_cov_1.55556_ID_453058
NODE_5385_length_2197_cov_10.4433_ID_454594
NODE_5574_length_2173_cov_6.66862_ID_459456
NODE_6004_length_2119_cov_2.72992_ID_470967
NODE_6015_length_2118_cov_11.4249_ID_471253
NODE_6060_length_2112_cov_5.43001_ID_472509
NODE_6087_length_2111_cov_6.20323_ID_473159
NODE_6103_length_2108_cov_1.46138_ID_473549
NODE_6252_length_2091_cov_16.0005_ID_477433
NODE_6712_length_2040_cov_3.86364_ID_490039
NODE_6947_length_2019_cov_4.76903_ID_496081
NODE_7285_length_1987_cov_2.81462_ID_504691
NODE_7909_length_1928_cov_2.18469_ID_520799
NODE_8027_length_1919_cov_2.30636_ID_524187
NODE_7989_length_1924_cov_10.6878_ID_523009
NODE_8467_length_1882_cov_2.60785_ID_535791
NODE_8671_length_1867_cov_9.89655_ID_541269
NODE_8753_length_1861_cov_3.63956_ID_543349
NODE_10557_length_1740_cov_1.96838_ID_591626
NODE_11196_length_1703_cov_3.23477_ID_609078
NODE_11327_length_1696_cov_1.72084_ID_612382
NODE_11939_length_1663_cov_8.58203_ID_628831
NODE_12034_length_1657_cov_11.9007_ID_631412
NODE_12583_length_1628_cov_2.33489_ID_645822
NODE_12603_length_1628_cov_4.25916_ID_646480
NODE_12835_length_1616_cov_4.67495_ID_652698
NODE_12853_length_1615_cov_3.86089_ID_2779926
NODE_13133_length_1601_cov_3.43419_ID_660244
NODE_15689_length_1489_cov_2.07489_ID_729013
NODE_15751_length_1487_cov_9.30809_ID_730729
NODE_15980_length_1476_cov_0.807265_ID_737107
NODE_16950_length_1441_cov_3.17808_ID_762674
NODE_16773_length_1446_cov_1.68357_ID_757992
NODE_19219_length_1367_cov_7.71855_ID_1562338
NODE_19626_length_1353_cov_5.95759_ID_835430
NODE_19817_length_1347_cov_6.30492_ID_840848
NODE_20046_length_1340_cov_2.91591_ID_2821170
NODE_20354_length_1331_cov_4.19518_ID_854994
NODE_22074_length_1281_cov_2.20364_ID_900315
NODE_23188_length_1250_cov_1.26803_ID_930657
NODE_23195_length_1250_cov_1.77471_ID_930813
NODE_24784_length_1211_cov_4.69124_ID_2486533
NODE_24878_length_1210_cov_2.97969_ID_975612
NODE_25390_length_1197_cov_3.18785_ID_989340
NODE_27184_length_1159_cov_4.31492_ID_1037406
NODE_27597_length_1150_cov_2.14272_ID_1049068
NODE_28183_length_1138_cov_14.458_ID_2444399
NODE_28534_length_1130_cov_1.89741_ID_1073782
NODE_29767_length_1107_cov_8.45612_ID_1106836
NODE_29818_length_1106_cov_15.8938_ID_1108162
NODE_31766_length_1070_cov_5.21951_ID_2435644
NODE_32612_length_1049_cov_3.70291_ID_1181183
NODE_32804_length_1052_cov_1.29514_ID_1186197
NODE_35301_length_1011_cov_7.02036_ID_1251459
NODE_35760_length_1005_cov_5.62415_ID_1263517
NODE_36664_length_992_cov_3.8948_ID_1286987
NODE_37371_length_981_cov_0.566745_ID_1305218
NODE_39152_length_957_cov_7.87229_ID_1351977
NODE_39457_length_952_cov_2.89455_ID_1360013
NODE_40396_length_939_cov_4.34483_ID_1384362
NODE_42574_length_910_cov_1.03954_ID_1441692
NODE_43922_length_894_cov_2.60887_ID_1477810
NODE_45535_length_875_cov_0.954545_ID_1520639
NODE_48180_length_847_cov_1.54583_ID_1590821
NODE_54172_length_788_cov_3.39486_ID_1749128
NODE_57676_length_758_cov_2.42314_ID_1842472
NODE_62183_length_723_cov_5.97987_ID_1961946
NODE_73457_length_653_cov_32.0837_ID_2435012
NODE_76907_length_634_cov_0.238659_ID_2345923
NODE_77087_length_633_cov_1.22727_ID_2348604
NODE_78036_length_628_cov_1.86427_ID_2362492

## Sheet: Table S5
Transcript ID	Genome contig ID	Intron boundaries (XX/YY)	ID	Name	E-value
TR253|c0_g1_i3	NODE_11196_length_1703_cov_3.23477_ID_609078	GAAG	XP_011409256.1	PREDICTED: arylsulfatase K-like, partial [Amphimedon queenslandica]	1e-17
TR24019|c0_g5_i1	NODE_10230_length_1760_cov_8.85915_ID_583031	TTTC	XP_013761339.1	hypothetical protein AMSG_01829 [Thecamonas trahens ATCC 50062]_x0001_KNC55565.1 hypothetical protein AMSG_01829 [Thecamonas trahens ATCC 50062]	5e-07
TR7201|c0_g1_i2	NODE_15980_length_1476_cov_0.807265_ID_737107	ATGC	WP_013530465.1	FAD-dependent oxidoreductase [Mesorhizobium ciceri]_x0001_YP_004141832.1 FAD dependent oxidoreductase [Mesorhizobium ciceri biovar biserrulae WSM1271]_x0001_ADV11782.1 FAD dependent oxidoreductase [Mesorhizobium ciceri biovar biserrulae WSM1271]	1e-30
TR40303|c0_g5_i1	NODE_19219_length_1367_cov_7.71855_ID_1562338	CCGC	EKD35099.1	AtoB1, partial [uncultured bacterium]	1e-13
TR7523|c4_g2_i2	NODE_1935_length_2936_cov_0.219651_ID_367149	GGTC	WP_016232390.1	vitamin B12 transporter BtuB [Escherichia coli]_x0001_EOU55415.1 vitamin B12 transporter BtuB [Escherichia coli KTE14]	0
TR25071|c1_g3_i1	NODE_19817_length_1347_cov_6.30492_ID_840848	GCGG	OGR46849.1	hypothetical protein A2X33_00910 [Elusimicrobia bacterium GWA2_51_34]_x0001_OGR60191.1 hypothetical protein A2X34_02535 [Elusimicrobia bacterium GWC2_51_8]_x0001_OGR87374.1 hypothetical protein A2021_00885 [Elusimicrobia bacterium GWF2_52_66]	1e-05
TR25403|c2_g1_i1	NODE_23188_length_1250_cov_1.26803_ID_930657	GAAG	XP_015687985.1	PREDICTED: nuclear cap-binding protein subunit 2 [Protobothrops mucrosquamatus]	2e-14
TR8984|c1_g1_i4	NODE_2441_length_2752_cov_8.47695_ID_379387	GAAG	WP_058444154.1	hypothetical protein [Pseudomonas syringae]_x0001_KTC09045.1 hypothetical protein AO387_15700 [Pseudomonas syringae ICMP 11168]	8e-21
TR46148|c0_g1_i1	NODE_24878_length_1210_cov_2.97969_ID_975612	GCTT	XP_004987963.1	hypothetical protein PTSG_13136 [Salpingoeca rosetta]_x0001_EGD81094.1 hypothetical protein PTSG_13136 [Salpingoeca rosetta]	4e-08
TR5495|c0_g1_i1	NODE_2694_length_2676_cov_4.30902_ID_385482	GCTG	XP_014156282.1	hypothetical protein SARC_05331 [Sphaeroforma arctica JP610]_x0001_KNC82380.1 hypothetical protein SARC_05331 [Sphaeroforma arctica JP610]	7e-06
TR42|c0_g1_i1	NODE_2839_length_2637_cov_4.96616_ID_493689	CGAG	SET20936.1	Predicted oxidoreductase [Paenibacillus sp. NFR01]	1e-72
TR41463|c0_g1_i3	NODE_31766_length_1070_cov_5.21951_ID_2435644	ATAG	EWM28676.1	mapeg family protein [Nannochloropsis gaditana]	8e-23
TR42558|c0_g1_i2	NODE_3314_length_2540_cov_7.71269_ID_400566	AAAG	KZP01138.1	aminotransferase [Calocera viscosa TUFC12733]	1e-07
TR44078|c0_g1_i1	NODE_37371_length_981_cov_0.566745_ID_1305218	GGAA	GAQ85885.1	hypothetical protein KFL_002590130 [Klebsormidium flaccidum]	8e-11
TR45681|c0_g1_i1	NODE_4154_length_2371_cov_2.92424_ID_422547	CGTG	CUI14842.1	methyltransferase, putative [Bodo saltans]	2e-09
TR27576|c0_g1_i1	NODE_4362_length_2338_cov_3.25102_ID_428061	CGTG	XP_004338419.1	hypothetical protein ACA1_352500 [Acanthamoeba castellanii str. Neff]_x0001_ELR16406.1 hypothetical protein ACA1_352500 [Acanthamoeba castellanii str. Neff]	2e-61
TR12095|c4_g1_i1	NODE_4487_length_2322_cov_3.46901_ID_431319	TTAC	XP_011281743.1	PREDICTED: EF-hand calcium-binding domain-containing protein 11 isoform X4 [Felis catus]	3e-07
TR21570|c0_g1_i1	NODE_468_length_4064_cov_3.8697_ID_699081	CTTC	XP_001468412.1	conserved hypothetical protein [Leishmania infantum JPCM5]_x0001_CAM71496.1 conserved hypothetical protein [Leishmania infantum JPCM5]	2e-12
TR50117|c0_g1_i1	NODE_4_length_7939_cov_7.59173_ID_597866	CGAG	AFP39475.1	Hydroxyneurosporene-O-methyltransferase [Mycobacterium smegmatis str. MC2 155]	3e-16
TR1005|c0_g1_i1	NODE_5194_length_2224_cov_0.837864_ID_449548	GAAG	XP_012756084.1	hypothetical protein SAMD00019534_041250 [Acytostelium subglobosum LB1]_x0001_GAM20950.1 hypothetical protein SAMD00019534_041250 [Acytostelium subglobosum LB1]	6e-12
TR49438|c0_g1_i1	NODE_6004_length_2119_cov_2.72992_ID_470967	CATG	XP_006129610.1	PREDICTED: hydrocephalus-inducing protein-like [Pelodiscus sinensis]	3e-06
TR50860|c0_g1_i1	NODE_6015_length_2118_cov_11.4249_ID_471253	CACG	XP_844317.1	hypothetical protein [Trypanosoma brucei brucei TREU927]_x0001_AAX79906.1 hypothetical protein, conserved [Trypanosoma brucei]_x0001_AAZ10758.1 hypothetical protein, conserved [Trypanosoma brucei brucei TREU927]	6e-09
TR43746|c0_g1_i1	NODE_643_length_3765_cov_2.78972_ID_339115	CGGG	WP_010245052.1	TIGR02452 family protein [Acetivibrio cellulolyticus]	9e-19
TR27401|c0_g1_i1	NODE_718_length_3689_cov_5.25239_ID_340686	GTCC	XP_009032310.1	hypothetical protein AURANDRAFT_60628 [Aureococcus anophagefferens]_x0001_EGB12652.1 hypothetical protein AURANDRAFT_60628 [Aureococcus anophagefferens]	2e-26
TR36770|c0_g1_i1	NODE_77087_length_633_cov_1.22727_ID_2348604	CCAC	WP_015079075.1	hypothetical protein [Anabaena sp. 90]_x0001_AFW93911.1 WD-40 repeat-containing protein [Anabaena sp. 90]	5e-95
TR21823|c0_g9_i4	NODE_941_length_3477_cov_11.1168_ID_345030	GTAT	XP_002512059.2	PREDICTED: cytochrome b5 isoform A [Ricinus communis]	3e-08

## Sheet: Table S6
Contig	Characteristic	Note	Annotation based on BLAST
Cases without alternative transcripts
NODE_2839_length_2637_cov_4.96616_ID_493689	ACATC|GCTCCCTGCGCGAGTTCGGGAGGGG...GCCCCCGCCGAACTCGAGCCCTCC|GACTT		Predicted oxidoreductase [Paenibacillus sp. NFR01], bit score 327, e-value 1e-72
NODE_4362_length_2338_cov_3.25102_ID_428061	CCCCA|GCAGCCGCGCTCAGCTGCATTGGGAGGGGAGTGA...CTTCTCCCCTCCAGAGTGCAGCTGACCCCTCTTCCACC|GCACT		hypothetical protein ACA1_352500 [Acanthamoeba castellanii str. Neff] ELR16406.1 hypothetical protein ACA1_352500 [Acanthamoeba castellanii str. Neff], bit score 343, e-value 2e-61
NODE_6015_length_2118_cov_11.4249_ID_471253	GGATT|GCAAATTATAGGCCCACTCCCCTGACC...GGCTGGGGGGAGTGGGCTTTTTCTCTCACC|GCACC		hypothetical protein [Trypanosoma brucei brucei TREU927] AAX79906.1 hypothetical protein, conserved [Trypanosoma brucei] AAZ10758.1 hypothetical protein, conserved [Trypanosoma brucei brucei TREU927], bit score 153, e-value 6e-09
NODE_718_length_3689_cov_5.25239_ID_340686	GGGCT|GCACGGGGTTAACTCCGACATCCCCCCAACTCTCCTTTCGAAATTGTCTGTC...GATGGATAATTTGGAAGGTTCTGGGGAGGATATCGAGGGGAGACCCTGCC|GCACG	Figure 4	hypothetical protein AURANDRAFT_60628 [Aureococcus anophagefferens] EGB12652.1 hypothetical protein AURANDRAFT_60628 [Aureococcus anophagefferens], bit score 278, e-value 2e-26
Cases with alternative transcripts
NODE_15980_length_1476_cov_0.807265_ID_737107	TTATC|GCATATGGGCTGCGCGACTGCGGGGACCAAAATCCGCCTATT...GATAGGCGTTTATTGGTCCCATGAGTTTGCAAGGCTCTAAACT|GCTTT		FAD-dependent oxidoreductase [Mesorhizobium ciceri] YP_004141832.1 FAD dependent oxidoreductase [Mesorhizobium ciceri biovar biserrulae WSM1271] ADV11782.1 FAD dependent oxidoreductase [Mesorhizobium ciceri biovar biserrulae WSM1271], bit score 460, e-value 1e-30
NODE_6004_length_2119_cov_2.72992_ID_470967	CCTAT|GCAGCGACGATACCTCCCAGGACAAGTACACGCGCAGGACAATCCCCAGCTCCTCACT...AGTGGAAGGTAAGGGGTTCTGCTAGCGATGCCAACTGGGAGGCTTTGTCGTTTTT|GGCTC		PREDICTED: hydrocephalus-inducing protein-like [Pelodiscus sinensis], bit score 234, e-value 3e-06
NODE_643_length_3765_cov_2.78972_ID_339115	CTTCA|GCCCATTCCCCCGAGGGTCCGGTCACAGCCTTGCAGAAAGGAGGG... CCCTTCTTCCTGCTCGCGCCCTGACTTGACGCTCCCCTTACC|GTTGC		TIGR02452 family protein [Acetivibrio cellulolyticus], bit score 286, e-value 9e-19
	green typical features (for green euglenids), red atypical ones, gray shaded repeats, basepaired nucleotides underlined.

## Sheet: Table S7
Rhabdomonas transcript ID	KEGG nr.	Module	Category	Anotation	NCBI best hit annotation	NCBI best hit e-value	NCBI best hit organism	Mitominer best hit annotation	Mitominer hit e-value	Mitominer ID - best hit	Splice leader present	First hit prokaryote	Target P	Mitofates	Orthologue enriched in Euglena mitoproteome	Euglena transcript orthologue	Included based on Mitominer and targeting prediction	Included based on enrichment in E. gracilis mt proteome
RCo045652	K00294	Alanine, aspartate and glutamate metabolism	Amino acid metabolism	1-pyrroline-5-carboxylate dehydrogenase	XP_005705265.1 1-pyrroline-5-carboxylate dehydrogenase	4.3e-183	Galdieria sulphuraria	P30038 Delta-1-pyrroline-5-carboxylate dehydrogenase, mitochondrial H. sapiens 0 8P30038	0	AL4A1_HUMAN	N	N	0.64	-	Y	EG_transcript_28001	Y	Y
RCo029555	K00264	Alanine, aspartate and glutamate metabolism	Amino acid metabolism	Glutamate synthase (NADPH/NADH)	ORX88489.1 glutamate synthase	0	Basidiobolus meristosporus CBS 931.73	Q12680 Glutamate synthase [NADH] S. cerevisiae S288c 0 4Q12680	0	GLT1_YEAST	N	N	-	-	N	-	N	N
RCo022693	K14455	Alanine, aspartate and glutamate metabolism	Amino acid metabolism	Aspartate aminotransferase, mitochondrial	XP_004339901.1 aspartate aminotransferase, putative	7.5e-129	Acanthamoeba castellanii str. Neff	Q23JV0 Aminotransferase, classes I and II family protein T. thermophila SB210 0 1Q23JV0	3e-162	Q23JV0_TETTS	N	N	-	-	Y	EG_transcript_13959	N	Y
RCo046437	K00814	Alanine, aspartate and glutamate metabolism	Amino acid metabolism	Alanine aminotransferase	XP_030545002.1 glutamate--glyoxylate aminotransferase 2	7.7e-56	Rhodamnia argentea	F4I7I0 Alanine aminotransferase 1, mitochondrial A. thaliana 0 3F4I7I0	3e-64	ALAT1_ARATH	Y	N	0.969	0.662	N	-	Y	N
RCo013035	K00259	Alanine, aspartate and glutamate metabolism	Amino acid metabolism	Alanine dehydrogenase	WP_109067833.1 alanine dehydrogenase	3.7e-53	Azospirillum sp. TSH58	D6RAI5 NAD(P) transhydrogenase, mitochondrial H. sapiens 0 7D6RAI5	3e-15	D6RAI5_HUMAN	N	N	0.619	-	N	-	Y	N
RCo000174	K00262	Alanine, aspartate and glutamate metabolism	Amino acid metabolism	Glutamate dehydrogenase (NADP+)	-	-	-	-	-	-	N	N	-	-	N	-	N	N
RCo026704	K00294	Alanine, aspartate and glutamate metabolism	Amino acid metabolism	1-pyrroline-5-carboxylate dehydrogenase	VUM67548.1 hypothetical protein ADIDNJGF_03458	2.3e-12	Stenotrophomonas maltophilia	-	-	-	N	N	-	-	Y	EG_transcript_28001	N	Y
RCo047256	K01580	Alanine, aspartate and glutamate metabolism	Amino acid metabolism	Glutamate decarboxylase	GBF91842.1 glutamate decarboxylase	1.4e-66	Raphidocelis subcapitata	-	-	-	N	N	-	-	N	-	N	N
RCo027499	K01915	Alanine, aspartate and glutamate metabolism	Amino acid metabolism	Glutamine synthetase	WP_147166314.1 glutamine synthetase type III	2.8e-254	Phaeodactylibacter luteus	-	-	-	Y	N	0.888	0.498	Y	EG_transcript_3524	N	Y
RCo028904	K13566	Alanine, aspartate and glutamate metabolism, Arginin biosynthesis	Amino acid metabolism	Omega-amidase	TRY68468.1 hypothetical protein TCAL_06844	2.3e-76	Tigriopus californicus	Q9NQR4 Omega-amidase NIT2 H. sapiens 1 0Q9NQR4	1e-101	NIT2_HUMAN	Y	N	-	-	Y	EG_transcript_21133	N	Y
RCo046944	K00819	Arginine and proline metabolism	Amino acid metabolism	Ornithine aminotransferase	RLD50666.1 ornithine--oxo-acid transaminase	5.4e-157	Bacteroidetes bacterium	P29758 Ornithine aminotransferase, mitochondrial M. musculus 0 27P29758	0	OAT_MOUSE	N	N	0.628	0.385	Y	EG_transcript_9616	Y	Y
RCo019514	K00933	Arginine and proline metabolism	Amino acid metabolism	Arginine kinase	CUG81586.1 arginine kinase, putative	1.9e-164	Bodo saltans	P07310 Creatine kinase M-type M. musculus 0 2P07310	7e-75	KCRM_MOUSE	Y	N	0.703	-	N	-	Y	N
RCo050316	K00286	Arginine and proline metabolism	Amino acid metabolism	Pyrroline-5-carboxylate reductase	WP_088259042.1 pyrroline-5-carboxylate reductase	3.4e-61	Fimbriiglobus ruber	Q922Q4 Pyrroline-5-carboxylate reductase 2 M. musculus 0 2Q922Q4	5e-55	P5CR2_MOUSE	Y	N	-	-	Y	EG_transcript_18673	N	Y
RCo045219	K12657	Arginine and proline metabolism	Amino acid metabolism	Delta-1-pyrroline-5-carboxylate synthetase	XP_031570178.1 delta-1-pyrroline-5-carboxylate synthase-like	1.4e-55	Actinia tenebrosa	-	-	-	N	N	0.927	0.986	Y	EG_transcript_12699	N	Y
RCo014523	K00931	Arginine and proline metabolism	Amino acid metabolism	Glutamate 5-kinase	HCU25413.1 glutamate 5-kinase	5e-56	Deltaproteobacteria bacterium	-	-	-	Y	N	0.732	-	Y	EG_transcript_12699	N	Y
RCo041841	K12657	Arginine and proline metabolism	Amino acid metabolism	Delta-1-pyrroline-5-carboxylate synthetase	GAQ89957.1 delta 1-pyrroline-5-carboxylate synthetase	4.7e-128	Klebsormidium nitens	-	-	-	Y	N	-	-	Y	EG_transcript_6612	N	Y
RCo022997	K12657	Arginine and proline metabolism	Amino acid metabolism	Delta-1-pyrroline-5-carboxylate synthetase	XP_026318860.1 delta-1-pyrroline-5-carboxylate synthase	1.4e-128	Hyposmocoma kahamanoa	-	-	-	N	N	-	-	Y	EG_transcript_6612	N	Y
RCo022945	K01738	Cysteine and methionine metabolism	Amino acid metabolism	Cysteine synthase	TMW58925.1 hypothetical protein Poli38472_007070	7e-115	Pythium oligandrum	O59701 Cysteine synthase 1 S. pombe 972h- 1 0O59701	2e-64	CYSK1_SCHPO	N	N	-	-	Y	EG_transcript_11659	N	Y
RCo044612	K01697	Cysteine and methionine metabolism	Amino acid metabolism	Cystathionine beta-synthase	MAF64991.1 cystathionine beta-synthase	2.7e-17	Planctomycetes bacterium	Q7RYW6 Cysteine synthase N. crassa OR74A 0 1Q7RYW6	4e-16	Q7RYW6_NEUCR	Y	N	0.77	-	N	-	Y	N
RCo005741	K22207	Cysteine and methionine metabolism	Amino acid metabolism	L-cysteine desulfhydrase	XP_028791495.1 probable L-cysteine desulfhydrase, chloroplastic	1.2e-46	Prosopis alba	Q1K6H7 Cysteine desulfurase, mitochondrial N. crassa OR74A 0 1Q1K6H7	0.0001	Q1K6H7_NEUCR	N	N	-	-	Y	EG_transcript_10854	N	Y
RCo051020	K01738	Cysteine and methionine metabolism	Amino acid metabolism	Cysteine synthase	WP_064975604.1 cysteine synthase family protein	3.9e-99	Alistipes provencensis	-	-	-	Y	N	-	-	Y	EG_transcript_11659	N	Y
RCo013733	K01738	Cysteine and methionine metabolism	Amino acid metabolism	Cysteine synthase	CCZ10951.1 cysteine synthase	3.2e-101	Odoribacter sp. CAG:788	-	-	-	Y	N	-	-	Y	EG_transcript_11659	N	Y
RCo009036	K01738	Cysteine and methionine metabolism	Amino acid metabolism	Cysteine synthase	XP_002949438.1 hypothetical protein VOLCADRAFT_89892	1.8e-104	Volvox carteri f. nagariensis	-	-	-	N	N	-	-	Y	EG_transcript_11659	N	Y
RCo041324	K00826	Cysteine and methionine metabolism	Amino acid metabolism	Branched-chain amino acid aminotransferase	KAF0853044.1 mitochondrial branched-chain amino acid degradation aminotransferase	1.1e-111	Andalucia godoyi	-	-	-	Y	N	-	-	Y	EG_transcript_9159	N	Y
RCo018965	K01738	Cysteine and methionine metabolism	Amino acid metabolism	Cysteine synthase	TMW58925.1 hypothetical protein Poli38472_007070	1e-112	Pythium oligandrum	-	-	-	N	N	-	-	Y	EG_transcript_11659	N	Y
RCo016108	K01738	Cysteine and methionine metabolism	Amino acid metabolism	Cysteine synthase	OYV74503.1 cysteine synthase A	9.4e-118	Deltaproteobacteria bacterium 21-66-5	-	-	-	N	N	-	-	Y	EG_transcript_11659	N	Y
RCo016104	K01738	Cysteine and methionine metabolism	Amino acid metabolism	Cysteine synthase	OYV74503.1 cysteine synthase A	2.1e-118	Deltaproteobacteria bacterium 21-66-5	-	-	-	N	N	-	-	Y	EG_transcript_11659	N	Y
RCo014763	K05360	Glutathione metabolism	Amino acid metabolism	Protein-disulfide reductase (glutathione)	XP_022087741.1 thioredoxin domain-containing protein 12-like	3.3e-40	Acanthaster planci	O95881 Thioredoxin domain-containing protein 12 H. sapiens 0 1O95881	8e-41	TXD12_HUMAN	Y	N	0.955	0.94	N	-	Y	N
RCo011367	-	Glutathione metabolism	Amino acid metabolism	Glutathion peroxidase	WP_132924400.1 glutathione peroxidase	2e-24	Sodalis sp. 159R	Pygsuia biforma rperoxiredoxin homologue	3e-31	Pyg_Prx5	N	N	-	-	Y	EG_transcript_15735	N	Y
RCo036833	K00799	Glutathione metabolism	Amino acid metabolism	Glutathione s-transferase	TFJ84359.1 hypothetical protein NSK_004346	2.6e-26	Nannochloropsis salina CCMP1776	Q9CPU4 Microsomal glutathione S-transferase 3 M. musculus 0 1Q9CPU4	2e-10	MGST3_MOUSE	N	N	-	-	Y	EG_transcript_32464	N	Y
RCo013421	-	Glutathione metabolism	Amino acid metabolism	Glutathion peroxidase	WP_050433598.1 glutathione peroxidase	9.9e-07	Chondromyces crocatus	-	-	-	Y	N	-	-	Y	EG_transcript_15735	N	Y
RCo023072	K00799	Glutathione metabolism	Amino acid metabolism	Glutathione s-transferase	KOO23893.1 flagella associated protein	2.6e-15	Chrysochromulina tobinii	-	-	-	N	N	-	-	Y	EG_transcript_18840	N	Y
RCo020565	K00799	Glutathione metabolism	Amino acid metabolism	Glutathione s-transferase	OMJ80066.1 hypothetical protein SteCoe_19756	3.8e-35	Stentor coeruleus	-	-	-	Y	N	-	-	Y	EG_transcript_18840	N	Y
RCo048177	K00281	Glycine, serine and threonine metabolism	Amino acid metabolism	Glycine dehydrogenase	XP_637330.1 glycine dehydrogenase	0	Dictyostelium discoideum AX4	O80988 Glycine dehydrogenase [decarboxylating]2, mitochondrial A. thaliana 0 4O80988	0	GCSP2_ARATH	Y	N	0.944	0.971	Y	EG_transcript_1548	Y	Y
RCo010764	K00382	Glycine, serine and threonine metabolism	Amino acid metabolism	Dihydrolipoamide dehydrogenase	CAF05589.1 dihydrolipoyl dehydrogenase	3.9e-180	Euglena gracilis	O00087 Dihydrolipoyl dehydrogenase, mitochondrial S. pombe 972h- 1 0O00087	2e-179	DLDH_SCHPO	N	N	-	0.569	Y	EG_transcript_8679	Y	Y
RCo042973	K00600	Glycine, serine and threonine metabolism	Amino acid metabolism	Glycine hydroxymethyltransferase	AGT02562.1 glycine hydroxymethyltransferase	1.3e-173	Herpetomonas muscarum	Pygsuia biforma SHMT homologue	2e-178	Pyg_SHMT	Y	N	-	-	Y	EG_transcript_7542	N	Y
RCo035033	K00600	Glycine, serine and threonine metabolism	Amino acid metabolism	Glycine hydroxymethyltransferase	OAO17840.1 SHMT, serine hydroxymethyltransferase	1e-161	Blastocystis sp. ATCC 50177/Nand II	Q9CZN7 Serine hydroxymethyltransferase M. musculus 0 26Q9CZN7	7e-177	Q9CZN7_MOUSE	Y	N	-	-	Y	EG_transcript_7542	N	Y
RCo046360	K00605	Glycine, serine and threonine metabolism	Amino acid metabolism	Glycine cleavage system T protein (aminomethyltransferase)	KYR02298.1 aminomethyltransferase	5.3e-103	Tieghemostelium lacteum	O65396 Aminomethyltransferase, mitochondrial A. thaliana 0 2O65396	1e-106	GCST_ARATH	Y	N	0.827	0.848	Y	EG_transcript_9664	Y	Y
RCo027514	K02437	Glycine, serine and threonine metabolism	Amino acid metabolism	Glycine cleavage system H protein	PQQ07861.1 pentatricopeptide repeat-containing protein	3.8e-29	Prunus yedoensis var. nudiflora	Q91WK5 Glycine cleavage system H protein, mitochondrial M. musculus 0 19Q91WK5	3e-34	GCSH_MOUSE	Y	N	0.898	0.825	Y	EG_transcript_30675	Y	Y
RCo044080	K00108	Glycine, serine and threonine metabolism	Amino acid metabolism	Choline dehydrogenase	WP_018681255.1 hypothetical protein	1.1e-26	Actinokineospora enzanensis	Q6UPE0 Choline dehydrogenase, mitochondrial R. norvegicus 0 6Q6UPE0	1e-17	CHDH_RAT	N	N	0.903	-	Y	EG_transcript_6291	Y	Y
RCo038856	K01620	Glycine, serine and threonine metabolism	Amino acid metabolism	Threonine aldolase	WP_060687126.1 low-specificity L-threonine aldolase	1.4e-93	Ardenticatena maritima	-	-	-	Y	N	-	-	Y	EG_transcript_3771	N	Y
RCo041450	K22589	Glycine, serine and threonine metabolism	Amino acid metabolism	Threo-3-hydroxy-L-aspartate ammonia-lyase	TPX62256.1 threonine ammonia-lyase	3.4e-171	Powellomyces hirtus	-	-	-	Y	N	-	-	Y	EG_transcript_20697	N	Y
RCo008381	K01705	Lysine biosynthesis	Amino acid metabolism	Homoaconitate hydratase	OPX32891.1 homoaconitase	2.1e-213	candidate division KSB1 bacterium 4484_188	Q9UT74 Homoaconitase, mitochondrial S. pombe 972h- 1 0Q9UT74	0	LYS4_SCHPO	Y	N	0.699	0.83	Y	EG_transcript_11950	Y	Y
RCo048680	K00825	Lysine biosynthesis	Amino acid metabolism	Kynurenine/2-aminoadipate aminotransferase	XP_004367702.1 hypothetical protein ACA1_255670	3.6e-116	Acanthamoeba castellanii str. Neff	Q64602 Kynurenine/alpha-aminoadipate aminotransferase, mitochondrial R. norvegicus 0 2Q64602	6e-116	AADAT_RAT	Y	N	0.557	-	N	-	Y	N
RCo013213	K05824	Lysine biosynthesis	Amino acid metabolism	Homoisocitrate dehydrogenase	PVG04161.1 mitochondrial NAD-homo-isocitrate dehydrogenase LysB	2.4e-76	Serendipita vermifera 'subsp. bescii'	P40495 Homoisocitrate dehydrogenase, mitochondrial S. cerevisiae S288c 3 7P40495	3e-91	LYS12_YEAST	N	N	-	-	Y	EG_transcript_10979	N	Y
RCo002972	K05824	Lysine biosynthesis	Amino acid metabolism	Homoisocitrate dehydrogenase	TAA75423.1 3-isopropylmalate dehydrogenase	1.5e-147	Candidatus Electronema sp. GS	Q945K7 Isocitrate dehydrogenase [NAD]catalytic subunit 5, mitochondrial A. thaliana 0 1Q945K7	2e-50	IDH5_ARATH	Y	Y	0.875	0.817	Y	EG_transcript_10979	Y	Y
RCo028388	K02554	Phenylalanine metabolism	Amino acid metabolism	2-keto-4-pentenoate hydratase	WP_097155518.1 hypothetical protein	3.9e-26	Cohaesibacter gelatinilyticus	-	-	-	Y	N	-	-	Y	EG_transcript_13389	N	Y
RCo052329	K01626	Phenylalanine, tyrosine and tryptophan biosynthesis	Amino acid metabolism	3-deoxy-7-phosphoheptulonate synthase	WP_143526538.1 3-deoxy-7-phosphoheptulonate synthase	3e-99	Rubrobacter xylanophilus	-	-	-	N	N	-	-	Y	EG_transcript_5731	N	Y
RCo004908	K01626	Phenylalanine, tyrosine and tryptophan biosynthesis	Amino acid metabolism	3-deoxy-7-phosphoheptulonate synthase	PYM36474.1 3-deoxy-7-phosphoheptulonate synthase	1.2e-116	Candidatus Rokubacteria bacterium	-	-	-	Y	N	0.64	-	N	-	N	N
RCo039548	K01841	Phosphonate and phosphinate metabolism	Amino acid metabolism	Phosphoenolpyruvate phosphomutase	XP_004347277.1 phosphoenolpyruvate phosphomutase	2.3e-112	Capsaspora owczarzaki ATCC 30864	Pygsuia biforma phosphoenol pyruvate phosphomutase homologe	7e-132	Pyg_PEPM	Y	N	0.869	0.958	N	-	Y	N
RCo011395	K09459	Phosphonate and phosphinate metabolism	Amino acid metabolism	Phosphoenolpyruvate decarboxylase	WP_017413590.1 phosphonopyruvate decarboxylase	1e-39	Clostridium tunisiense	Pygsuia biforma phospoenolpyruvate decarboxylase homologue	3e-38	Pyg_PPD	N	N	-	-	Y	EG_transcript_15698	N	Y
RCo027288	K03430	Phosphonate and phosphinate metabolism	Amino acid metabolism	2-aminoethylphosphonate-pyruvate transaminase	RMF92528.1 2-aminoethylphosphonate--pyruvate transaminase	6.6e-101	Nitrospinae bacterium	O35423 Serine--pyruvate aminotransferase, mitochondrial M. musculus 0 3O35423	8e-20	SPYA_MOUSE	N	N	0.829	0.721	Y	EG_transcript_14715	Y	Y
RCo044479	K09459	Phosphonate and phosphinate metabolism	Amino acid metabolism	Phosphoenolpyruvate decarboxylase	XP_013073561.1 PREDICTED: phosphonopyruvate decarboxylase-like isoform X1	1.5e-64	Biomphalaria glabrata	-	-	-	Y	N	0.922	0.444	Y	EG_transcript_15698	N	Y
RCo003998	K01501	Tryptophan metabolism	Amino acid metabolism	Nitrilase	RME97986.1 carbon-nitrogen hydrolase family protein	2.3e-40	Chloroflexi bacterium	Q9JHW2 Omega-amidase NIT2 M. musculus 0 5Q9JHW2	4e-08	NIT2_MOUSE	Y	N	0.749	-	N	-	Y	N
RCo003628	-	Tyrosin metabolism	Amino acid metabolism	Fumarylacetoacetase	NBS65654.1 fumarylacetoacetate hydrolase family protein	2.7e-106	Betaproteobacteria bacterium	Q3TC72 Fumarylacetoacetate hydrolase domain-containing protein 2A M. musculus 0 22Q3TC72	2e-31	FAHD2_MOUSE	Y	N	0.802	-	N	-	Y	N
RCo002914	K00545	Tyrosine metabolism	Amino acid metabolism	Catechol O-methyltransferase	XP_029994758.1 catechol O-methyltransferase A-like isoform X1	2.3e-48	Sphaeramia orbicularis	P21964 Catechol O-methyltransferase H. sapiens 1 0P21964	7e-61	COMT_HUMAN	Y	N	-	-	Y	EG_transcript_22899	N	Y
RCo032686	K01557	Tyrosine metabolism	Amino acid metabolism	Acylpyruvate hydrolase	XP_024385642.1 probable acylpyruvase FAHD1, mitochondrial	3e-29	Physcomitrella patens	Q7SDX2 Putative uncharacterized protein N. crassa OR74A 0 1Q7SDX2	5e-38	Q7SDX2_NEUCR	N	N	-	-	Y	EG_transcript_12184	N	Y
RCo002913	K00545	Tyrosine metabolism	Amino acid metabolism	Catechol O-methyltransferase	AAR20324.1 membrane-bound catechol O-methyltransferase, partial	4.8e-17	Canis lupus familiaris	E7EUU8 Catechol O-methyltransferase H. sapiens 1 0E7EUU8	2e-22	E7EUU8_HUMAN	Y	N	-	-	Y	EG_transcript_22899	N	Y
RCo045805	K01826	Tyrosine metabolism	Amino acid metabolism	5-carboxymethyl-2-hydroxymuconate isomerase	TMW66318.1 hypothetical protein Poli38472_004083	8.2e-72	Pythium oligandrum	-	-	-	N	N	-	-	Y	EG_transcript_12184	N	Y
RCo004625	K00053	Valine, leucine and isoleucine biosynthesis	Amino acid metabolism	Ketol-acid reductoisomerase	TMC49355.1 ketol-acid reductoisomerase	2e-147	Chloroflexi bacterium	P38674 Ketol-acid reductoisomerase, mitochondrial N. crassa OR74A 0 1P38674	2e-148	ILV5_NEUCR	Y	N	0.929	0.995	Y	EG_transcript_13481	Y	Y
RCo026914	K00052	Valine, leucine and isoleucine biosynthesis	Amino acid metabolism	3-isopropylmalate dehydrogenase	KUK26935.1 Isocitrate/isopropylmalate dehydrogenase	1.2e-131	Acetothermia bacterium 64_32	Q7SH15 Homoisocitrate dehydrogenase, mitochondrial N. crassa OR74A 0 1Q7SH15	6e-70	Q7SH15_NEUCR	N	N	0.946	1	Y	EG_transcript_10979	Y	Y
RCo020581	K01652	Valine, leucine and isoleucine biosynthesis	Amino acid metabolism	Acetolactate synthase I/II/III large subunit	OLP91395.1 Acetolactate synthase, mitochondrial	3.5e-35	Symbiodinium microadriaticum	P07342 Acetolactate synthase catalytic subunit, mitochondrial S. cerevisiae S288c 2 8P07342	1e-19	ILVB_YEAST	N	N	-	-	N	-	N	N
RCo050568	K01652	Valine, leucine and isoleucine biosynthesis	Amino acid metabolism	Acetolactate synthase I/II/III large subunit	PVU93799.1 hypothetical protein BB561_003032	4.3e-43	Smittium simulii	-	-	-	Y	N	-	-	Y	EG_transcript_7788	N	Y
RCo041326	K00826	Valine, leucine and isoleucine biosynthesis	Amino acid metabolism	Branched-chain amino acid aminotransferase	XP_020427975.1 branched-chain amino acid aminotransferase	1e-108	Heterostelium album PN500	-	-	-	Y	N	0.899	0.815	Y	EG_transcript_9159	N	Y
RCo039360	K01702	Valine, leucine and isoleucine biosynthesis	Amino acid metabolism	3-isopropylmalate dehydratase	OUS42900.1 aconitase family-domain-containing protein	1.1e-109	Ostreococcus tauri	-	-	-	N	N	-	-	Y	EG_transcript_21446	N	Y
RCo037411	K01652	Valine, leucine and isoleucine biosynthesis	Amino acid metabolism	Acetolactate synthase I/II/III large subunit	KOO35299.1 acetolactate synthase	8e-123	Chrysochromulina tobinii	-	-	-	N	N	-	-	Y	EG_transcript_7788	N	Y
RCo033714	K01703	Valine, leucine and isoleucine biosynthesis	Amino acid metabolism	3-isopropylmalate/(R)-2-methylmalate dehydratase large subunit	WP_151179648.1 3-isopropylmalate dehydratase large subunit	9.2e-153	Rhodospirillaceae bacterium R5913	-	-	-	Y	N	0.926	0.954	Y	EG_transcript_11950	N	Y
RCo017157	K01652	Valine, leucine and isoleucine biosynthesis	Amino acid metabolism	Acetolactate synthase I/II/III large subunit	CEM37797.1 unnamed protein product	5.1e-174	Vitrella brassicaformis CCMP3155	-	-	-	N	N	-	-	Y	EG_transcript_7788	N	Y
RCo035840	K01687	Valine, leucine and isoleucine biosynthesis	Amino acid metabolism	Dihydroxy-acid dehydratase	KFH72312.1 dihydroxy-acid dehydratase	5.1e-251	Mortierella verticillata NRRL 6337	-	-	-	Y	N	0.681	0.438	Y	EG_transcript_6624	N	Y
RCo042255	K00253	Valine, leucine and isoleucine degradation	Amino acid metabolism	Isovaleryl-CoA dehydrogenase	XP_005773416.1 long-chain specific acyl-CoA dehydrogenase	1.6e-140	Emiliania huxleyi CCMP1516	J3KR54 Isovaleryl-CoA dehydrogenase, mitochondrial H. sapiens 0 7J3KR54	1e-88	J3KR54_HUMAN	N	N	0.873	0.99	Y	EG_transcript_10100	Y	Y
RCo047669	K08683	Valine, leucine and isoleucine degradation	Amino acid metabolism	3-hydroxyacyl-CoA dehydrogenase / 3-hydroxy-2-methylbutyryl-CoA dehydrogenase / pteridine reductase 1	MAG33094.1 3-hydroxyacyl-CoA dehydrogenase	9.7e-27	Deltaproteobacteria bacterium	-	-	-	N	N	-	-	Y	EG_transcript_14917	N	Y
RCo028825	K00588	Phenylpropanoid biosynthesis	Biosynthesis of other secondary metabolites	Caffeoyl-CoA O-methyltransferase	TML34211.1 methyltransferase	8.6e-37	Actinobacteria bacterium	Q8BIG7 Catechol O-methyltransferase domain-containing protein 1 M. musculus 0 13Q8BIG7	1e-18	CMTD1_MOUSE	Y	N	-	-	Y	EG_transcript_17323	N	Y
RCo031039	-	Phenylpropanoid biosynthesis	Biosynthesis of other secondary metabolites	Caffeoyl-CoA O-methyltransferase	OGI44357.1 methyltransferase	1.6e-13	Candidatus Muproteobacteria bacterium RBG_16_64_11	O88587 Catechol O-methyltransferase M. musculus 0 3O88587	0.0002	COMT_MOUSE	N	N	0.642	0.518	Y	EG_transcript_17323	Y	Y
RCo045685	K00588	Phenylpropanoid biosynthesis	Biosynthesis of other secondary metabolites	Caffeoyl-CoA O-methyltransferase	TVQ43608.1 methyltransferase domain-containing protein	6.1e-11	Gloeocapsa sp. DLM2.Bin57	-	-	-	N	N	-	-	Y	EG_transcript_17323	N	Y
RCo028827	K00588	Phenylpropanoid biosynthesis	Biosynthesis of other secondary metabolites	Caffeoyl-CoA O-methyltransferase	WP_137146287.1 SAM-dependent methyltransferase	4e-17	Mycolicibacterium sp. CR10	-	-	-	Y	N	-	-	Y	EG_transcript_17323	N	Y
RCo051342	K00588	Phenylpropanoid biosynthesis	Biosynthesis of other secondary metabolites	Caffeoyl-CoA O-methyltransferase	TML52303.1 methyltransferase	3.7e-38	Actinobacteria bacterium	-	-	-	Y	N	-	-	Y	EG_transcript_17323	N	Y
RCo035126	K15979	Viral carcinogenesis	Cancer: overview	Staphylococcal nuclease domain-containing protein 1	XP_029236571.1 4SNc-Tudor domain protein	1.3e-08	Trypanosoma rangeli	Q78PY7 Staphylococcal nuclease domain-containing protein 1 M. musculus 0 13Q78PY7	2e-07	SND1_MOUSE	N	N	-	-	Y	EG_transcript_5843	N	Y
RCo044170	K15979	Viral carcinogenesis	Cancer: overview	Staphylococcal nuclease domain-containing protein 1	XP_025099282.1 staphylococcal nuclease domain-containing protein 1-like isoform X1	5.3e-16	Pomacea canaliculata	-	-	-	Y	N	-	-	Y	EG_transcript_5843	N	Y
RCo035350	K15979	Viral carcinogenesis	Cancer: overview	Staphylococcal nuclease domain-containing protein 1	XP_017771702.1 PREDICTED: staphylococcal nuclease domain-containing protein 1	4.9e-20	Nicrophorus vespilloides	-	-	-	N	N	-	-	Y	EG_transcript_5843	N	Y
RCo045929	K15306	Viral carcinogenesis	Cancer: overview	Ran-binding protein 1	XP_002173728.1 ran GTPase binding protein Sbp1	4.7e-35	Schizosaccharomyces japonicus yFS275	-	-	-	Y	N	-	-	Y	EG_transcript_19430	N	Y
RCo008238	K00326	Amino sugar and nucleotide sugar metabolism	Carbohydrate metabolism	NADH-cytochrome b5 reductase	XP_012751509.1 hypothetical protein SAMD00019534_086980	3.3e-62	Acytostelium subglobosum LB1	Q6BCY4 NADH-cytochrome b5 reductase 2 H. sapiens 1 0Q6BCY4	6e-63	NB5R2_HUMAN	Y	N	-	-	Y	EG_transcript_16283	N	Y
RCo047204	K00326	Amino sugar and nucleotide sugar metabolism	Carbohydrate metabolism	NADH-cytochrome b5 reductase	TPX71723.1 hypothetical protein SpCBS45565_g00796	3.4e-104	Spizellomyces sp. 'palustris'	Q9DCN2 NADH-cytochrome b5 reductase 3 M. musculus 0 8Q9DCN2	5e-39	NB5R3_MOUSE	Y	N	-	-	Y	EG_transcript_16283	N	Y
RCo003078	K00326	Amino sugar and nucleotide sugar metabolism	Carbohydrate metabolism	NADH-cytochrome b5 reductase	ORX88775.1 putative NADH-cytochrome b5 reductase	1.8e-28	Basidiobolus meristosporus CBS 931.73	Q7SFY2 NADH-cytochrome b5 reductase 2 N. crassa OR74A 0 1Q7SFY2	2e-34	MCR1_NEUCR	N	N	-	-	Y	EG_transcript_14896	N	Y
RCo038498	K00326	Amino sugar and nucleotide sugar metabolism	Carbohydrate metabolism	NADH-cytochrome b5 reductase	OVA00467.1 Oxidoreductase FAD/NAD(P)-binding	6.9e-27	Macleaya cordata	P83291 NADH-cytochrome b5 reductase-like protein A. thaliana 0 6P83291	5e-34	NB5R2_ARATH	Y	N	0.908	0.698	Y	EG_transcript_39015	Y	Y
RCo031731	K00326	Amino sugar and nucleotide sugar metabolism	Carbohydrate metabolism	NADH-cytochrome b5 reductase	ORX72223.1 ferredoxin reductase-like protein	3.6e-21	Linderina pennispora	-	-	-	N	N	-	-	Y	EG_transcript_18452	N	Y
RCo033411	K12451	Amino sugar and nucleotide sugar metabolism	Carbohydrate metabolism	3;5-epimerase/4-reductase	OUV83354.1 hypothetical protein CBC91_00690	2.4e-73	Rickettsiales bacterium TMED131	-	-	-	Y	N	-	-	Y	EG_transcript_23335	N	Y
RCo026859	K00326	Amino sugar and nucleotide sugar metabolism	Carbohydrate metabolism	NADH-cytochrome b5 reductase	XP_016610556.1 hypothetical protein SPPG_02976	3.5e-116	Spizellomyces punctatus DAOM BR117	-	-	-	Y	N	-	-	Y	EG_transcript_16283	N	Y
RCo025294	K00135	Butanoate metabolism	Carbohydrate metabolism	Succinate-semialdehyde dehydrogenase / glutarate-semialdehyde dehydrogenase	WP_161541681.1 NAD-dependent succinate-semialdehyde dehydrogenase	4.1e-135	Rhodothermus marinus	Q9SAK4 Succinate-semialdehyde dehydrogenase, mitochondrial A. thaliana 0 4Q9SAK4	3e-73	SSDH_ARATH	N	N	-	-	Y	EG_transcript_9413	N	Y
RCo043636	K00109	Butanoate metabolism	Carbohydrate metabolism	2-hydroxyglutarate dehydrogenase	ROL61055.1 NAD(P)/FAD-dependent oxidoreductase	1.1e-97	Bacteroidetes/Chlorobi group bacterium ChocPot_Mid	Q9H9P8 L-2-hydroxyglutarate dehydrogenase, mitochondrial H. sapiens 0 2Q9H9P8	4e-32	L2HDH_HUMAN	Y	N	-	-	Y	EG_transcript_15849	N	Y
RCo006440	K00109	Butanoate metabolism	Carbohydrate metabolism	2-hydroxyglutarate dehydrogenase	WP_028040613.1 NAD(P)/FAD-dependent oxidoreductase	2.3e-27	Caulobacter sp. URHA0033	-	-	-	N	N	-	-	Y	EG_transcript_15849	N	Y
RCo031904	K01689	Glycolysis / Gluconeogenesis	Carbohydrate metabolism	Enolase	CAB96126.1 chloroplast enolase, partial	4.6e-193	Euglena gracilis	P25696 Bifunctional enolase 2/transcriptional activator A. thaliana 0 1P25696	7e-159	ENO2_ARATH	Y	N	-	-	Y	EG_transcript_12376	N	Y
RCo019862	K01810	Glycolysis / Gluconeogenesis	Carbohydrate metabolism	Glucose-6-phosphate isomerase	XP_021304536.1 glucose-6-phosphate isomerase, cytosolic	4.5e-205	Sorghum bicolor	P06744 Glucose-6-phosphate isomerase H. sapiens 0 4P06744	4e-148	G6PI_HUMAN	Y	N	0.894	0.921	Y	EG_transcript_5108	Y	Y
RCo032837	K01689	Glycolysis / Gluconeogenesis	Carbohydrate metabolism	Enolase	CUG84387.1 enolase, putative	6.7e-115	Bodo saltans	Q23DP3 Enolase family protein T. thermophila SB210 0 1Q23DP3	1e-134	Q23DP3_TETTS	Y	N	-	-	Y	EG_transcript_12376	N	Y
RCo017775	K00016	Glycolysis / Gluconeogenesis	Carbohydrate metabolism	L-lactate dehydrogenase	RMD94024.1 malate dehydrogenase	4.5e-57	Calditrichaeota bacterium	P16125 L-lactate dehydrogenase B chain M. musculus 0 12P16125	1e-21	LDHB_MOUSE	Y	N	-	-	N	-	N	N
RCo055750	K01834	Glycolysis / Gluconeogenesis	Carbohydrate metabolism	2;3-bisphosphoglycerate-dependent phosphoglycerate mutase	RLD16675.1 2,3-diphosphoglycerate-dependent phosphoglycerate mutase	2.4e-71	candidate division KSB1 bacterium	-	-	-	Y	N	-	-	Y	EG_transcript_15371	N	Y
RCo027723	K01834	Glycolysis / Gluconeogenesis	Carbohydrate metabolism	2;3-bisphosphoglycerate-dependent phosphoglycerate mutase	ETO32160.1 phosphoglycerate mutase	4.1e-88	Reticulomyxa filosa	-	-	-	Y	N	-	-	Y	EG_transcript_15371	N	Y
RCo027952	K01624	Glycolysis / Gluconeogenesis	Carbohydrate metabolism	Fructose-bisphosphate aldolase	XP_002907678.1 fructose-bisphosphate aldolase	1.1e-139	Phytophthora infestans T30-4	-	-	-	N	N	-	-	Y	EG_transcript_21524	N	Y
RCo021453	K00128	Glycolysis / Gluconeogenesis	Carbohydrate metabolism	Aldehyde dehydrogenase (NAD+)	KIO04534.1 hypothetical protein M404DRAFT_143156	2.6e-155	Pisolithus tinctorius Marx 270	-	-	-	Y	N	-	-	Y	EG_transcript_5750	N	Y
RCo030649	K00927	Glycolysis / Gluconeogenesis	Carbohydrate metabolism	Phosphoglycerate kinase	AAU11484.1 cytosolic phosphoglycerate kinase	4.3e-172	Euglena gracilis	-	-	-	N	N	-	-	Y	EG_transcript_12260	N	Y
RCo054715	K01689	Glycolysis / Gluconeogenesis	Carbohydrate metabolism	Enolase	XP_005769024.1 hypothetical protein EMIHUDRAFT_445376	1.6e-175	Emiliania huxleyi CCMP1516	-	-	-	Y	N	0.847	0.566	Y	EG_transcript_12376	N	Y
RCo024527	K00134	Glycolysis / Gluconeogenesis	Carbohydrate metabolism	Glyceraldehyde 3-phosphate dehydrogenase	ALR69463.1 glyceraldehyde 3-phosphate dehydrogenase, partial	3.6e-191	Rhabdomonas costata	-	-	-	N	N	-	-	Y	EG_transcript_16406	N	Y
RCo055165	K01689	Glycolysis / Gluconeogenesis	Carbohydrate metabolism	Enolase	CAB96126.1 chloroplast enolase, partial	1.3e-196	Euglena gracilis	-	-	-	Y	N	0.533	-	Y	EG_transcript_12376	N	Y
RCo013159	K00042	Glyoxylate and dicarboxylate metabolism	Carbohydrate metabolism	2-hydroxy-3-oxopropionate reductase	KPI89768.1 putative 2-hydroxy-3-oxopropionate reductase	3.3e-39	Leptomonas seymouri	Q9V8M5 Probable 3-hydroxyisobutyrate dehydrogenase, mitochondrial D. melanogaster 0 1Q9V8M5	2e-16	3HIDH_DROME	N	N	-	-	Y	EG_transcript_15075	N	Y
RCo031011	K00889	Inositol phosphate metabolism	Carbohydrate metabolism	Phosphatidylinositol-4-phosphate 5-kinase related	CCC89268.1 conserved hypothetical protein	4.4e-18	Trypanosoma congolense IL3000	-	-	-	Y	N	-	-	Y	EG_transcript_18691	N	Y
RCo045223	K00816	Pentose phosphate pathway	Carbohydrate metabolism	Kynurenine-oxoglutarate transaminase / cysteine-S-conjugate beta-lyase / glutamine-phenylpyruvate transaminase, glutamine aminotransferase (GlnAT)	RKO92833.1 pyridoxal phosphate-dependent transferase	8.7e-34	Blyttiomyces helicus	-	-	-	Y	N	-	-	Y	EG_transcript_11207	N	Y
RCo032547	K00816	Pentose phosphate pathway	Carbohydrate metabolism	Kynurenine-oxoglutarate transaminase / cysteine-S-conjugate beta-lyase / glutamine-phenylpyruvate transaminase, glutamine aminotransferase (GlnAT)	XP_014161437.1 hypothetical protein SARC_00359	5.8e-39	Sphaeroforma arctica JP610	-	-	-	N	N	-	-	Y	EG_transcript_11207	N	Y
RCo014041	K00816	Pentose phosphate pathway	Carbohydrate metabolism	Kynurenine-oxoglutarate transaminase / cysteine-S-conjugate beta-lyase / glutamine-phenylpyruvate transaminase, glutamine aminotransferase (GlnAT)	XP_004990957.1 hypothetical protein PTSG_07452	4.6e-46	Salpingoeca rosetta	-	-	-	N	N	0.683	-	Y	EG_transcript_11207	N	Y
RCo055211	K00140	Propanoate metabolism	Carbohydrate metabolism	Malonate-semialdehyde dehydrogenase (acetylating) / methylmalonate-semialdehyde dehydrogenase	GAX96237.1 methylmalonate-semialdehyde dehydrogenase, mitochondrial precursor	3.4e-151	Pythium insidiosum	Q9EQ20 Methylmalonate-semialdehyde dehydrogenase [acylating], mitochondrial M. musculus 0 25Q9EQ20	0	MMSA_MOUSE	N	N	0.637	-	Y	EG_transcript_15045	Y	Y
RCo005823	K01965	Propanoate metabolism	Carbohydrate metabolism	Propionyl-CoA carboxylase alpha chain	CUG91340.1 carboxylase, putative	2e-199	Bodo saltans	P05165 Propionyl-CoA carboxylase alpha chain, mitochondrial H. sapiens 0 2P05165	0	PCCA_HUMAN	N	N	0.552	-	Y	EG_transcript_724	Y	Y
RCo028046	K01847	Propanoate metabolism	Carbohydrate metabolism	Methylmalonyl-CoA mutase	BAH03574.1 methylmalonyl-CoA mutase	2.9e-299	Euglena gracilis	P22033 Methylmalonyl-CoA mutase, mitochondrial H. sapiens 0 4P22033	0	MUTA_HUMAN	Y	N	-	-	Y	EG_transcript_4204	N	Y
RCo037816	K01908	Propanoate metabolism	Carbohydrate metabolism	Propionyl-CoA synthetase	WP_122031523.1 acetate--CoA ligase	1.8e-149	Candidatus Bipolaricaulis anaerobius	Q01574 Acetyl-coenzyme A synthetase 1 S. cerevisiae S288c 1 2Q01574	1e-95	ACS1_YEAST	Y	Y	-	-	Y	EG_transcript_3515	N	Y
RCo053422	K01578	Propanoate metabolism	Carbohydrate metabolism	Malonyl-CoA decarboxylase	WP_155890629.1 malonyl-CoA decarboxylase	1.6e-33	Desulfuromonas sp. TF	O95822 Malonyl-CoA decarboxylase, mitochondrial H. sapiens 0 3O95822	2e-34	DCMC_HUMAN	N	N	-	-	Y	EG_transcript_9247	N	Y
RCo008361	K18426	Propanoate metabolism	Carbohydrate metabolism	Ethylmalonyl-CoA/methylmalonyl-CoA decarboxylase	XP_028407670.1 ethylmalonyl-CoA decarboxylase-like	3.4e-30	Dendronephthya gigantea	M0R248 Delta(3,5)-Delta(2,4)-dienoyl-CoA isomerase, mitochondrial H. sapiens 0 10M0R248	2e-11	M0R248_HUMAN	Y	N	-	-	Y	EG_transcript_17348	N	Y
RCo014953	K01966	Propanoate metabolism	Carbohydrate metabolism	Propionyl-CoA carboxylase beta chain	-	-	-	-	-	-	N	N	-	-	N	-	N	N
RCo050526	K03417	Propanoate metabolism	Carbohydrate metabolism	Methylisocitrate lyase	SUS08933.1 2,3-dimethylmalate lyase	1.9e-50	uncultured Defluviicoccus sp.	-	-	-	Y	N	-	-	Y	EG_transcript_16544	N	Y
RCo038982	K01692	Propanoate metabolism	Carbohydrate metabolism	Ethylmalonyl-CoA/methylmalonyl-CoA decarboxylase-like	XP_002519236.1 probable enoyl-CoA hydratase 1, peroxisomal	3.1e-70	Ricinus communis	-	-	-	N	N	-	-	Y	EG_transcript_17043	N	Y
RCo042780	K01908	Propanoate metabolism	Carbohydrate metabolism	Propionyl-CoA synthetase	QAA76614.1 Acetyl-CoA synthetase	1e-158	Candidatus Bipolaricaulis sibiricus	-	-	-	Y	Y	-	-	Y	EG_transcript_3515	N	Y
RCo021302	K13524	Propanoate metabolism	Carbohydrate metabolism	4-aminobutyrate aminotransferase / (S)-3-amino-2-methylpropionate transaminase	WP_020674886.1 aminotransferase class III-fold pyridoxal phosphate-dependent enzyme	7.2e-179	Geopsychrobacter electrodiphilus	-	-	-	Y	N	0.851	0.941	Y	EG_transcript_12805	N	Y
RCo039592	K01966	Propanoate metabolism	Carbohydrate metabolism	Propionyl-CoA carboxylase beta chain	KAE9555065.1 hypothetical protein FO519_001726	4.3e-193	Halicephalobus sp. NKZ332	-	-	-	Y	N	0.934	0.994	Y	EG_transcript_6510	N	Y
RCo001268	K11262	Pyruvate metabolism	Carbohydrate metabolism	Acetyl-CoA carboxylase / biotin carboxylase 1	RCI05103.1 acetyl-coenzyme-A carboxylase, partial	2.5e-189	Rhizopus stolonifer	Q5SWU9 Acetyl-CoA carboxylase 1 M. musculus 0 6Q5SWU9	0	ACACA_MOUSE	N	N	-	-	N	-	N	N
RCo001267	K11262	Pyruvate metabolism	Carbohydrate metabolism	Acetyl-CoA carboxylase / biotin carboxylase 1	KZW01238.1 hypothetical protein EXIGLDRAFT_603199	8.2e-231	Exidia glandulosa HHB12029	Q00955 Acetyl-CoA carboxylase S. cerevisiae S288c 0 2Q00955	0	ACAC_YEAST	N	N	-	-	Y	EG_transcript_97	N	Y
RCo008351	K03737	Pyruvate metabolism	Carbohydrate metabolism	Pyruvate: nadp+ oxidoreductase (PNO)	BAB12024.1 pyruvate: NADP+ oxidoreductase	0	Euglena gracilis	Pygsuia biforma Pyruvate: nadp+ oxidoreductase (PNO) homologue	0	Pyg_PNO	N	N	0.889	0.958	Y	EG_transcript_2112	Y	Y
RCo000811	K00029	Pyruvate metabolism	Carbohydrate metabolism	Malate dehydrogenase (oxaloacetate-decarboxylating)(NADP+)	CAN95766.1 Malate dehydrogenase (oxaloacetate-decarboxylating) (NADP(+))	1.5e-184	Sorangium cellulosum So ce56	Pygsuia biforma malate dehydrogenase homologue	5e-142	Pyg_ME1	Y	N	-	-	Y	EG_transcript_4839	N	Y
RCo011296	K00016	Pyruvate metabolism	Carbohydrate metabolism	L-lactate dehydrogenase	WP_104547715.1 L-lactate dehydrogenase	3.2e-84	Chroococcidiopsis sp. TS-821	G5E8N5 L-lactate dehydrogenase M. musculus 0 14G5E8N5	6e-82	G5E8N5_MOUSE	Y	N	-	-	Y	EG_transcript_12212	N	Y
RCo018299	K00102	Pyruvate metabolism	Carbohydrate metabolism	D-lactate dehydrogenase (cytochrome)	TDI28507.1 FAD-binding protein	5.4e-63	Acidobacteria bacterium	Q7TNG8 Probable D-lactate dehydrogenase, mitochondrial M. musculus 0 13Q7TNG8	7e-74	LDHD_MOUSE	N	N	-	-	Y	EG_transcript_11827	N	Y
RCo006066	K00102	Pyruvate metabolism	Carbohydrate metabolism	D-lactate dehydrogenase (cytochrome)	PPR21776.1 putative FAD-linked oxidoreductase	3e-74	Alphaproteobacteria bacterium MarineAlpha10_Bin3	Q94AX4 D-lactate dehydrogenase [cytochrome], mitochondrial A. thaliana 0 1Q94AX4	3e-60	DLD_ARATH	Y	N	0.629	-	Y	EG_transcript_11827	Y	Y
RCo000813	K00027	Pyruvate metabolism	Carbohydrate metabolism	Malate dehydrogenase (oxaloacetate-decarboxylating)	CAN95766.1 Malate dehydrogenase (oxaloacetate-decarboxylating) (NADP(+))	1.1e-60	Sorangium cellulosum So ce56	P06801 NADP-dependent malic enzyme M. musculus 0 8P06801	3e-45	MAOX_MOUSE	Y	N	0.846	0.908	N	-	Y	N
RCo021955	K01649	Pyruvate metabolism	Carbohydrate metabolism	2-isopropylmalate synthase	RMG93242.1 2-isopropylmalate synthase	1.2e-177	Chloroflexi bacterium	Q12166 2-isopropylmalate synthase 2, mitochondrial S. cerevisiae S288c 3 4Q12166	2e-38	LEU9_YEAST	N	N	0.878	-	Y	EG_transcript_4221	Y	Y
RCo025226	K01596	Pyruvate metabolism	Carbohydrate metabolism	Phosphoenolpyruvate carboxykinase (GTP)	OHE22215.1 phosphoenolpyruvate carboxykinase	4.1e-41	Syntrophobacterales bacterium RBG_19FT_COMBO_59_10	H0YML5 Phosphoenolpyruvate carboxykinase [GTP], mitochondrial H. sapiens 0 3H0YML5	2e-30	H0YML5_HUMAN	N	N	-	-	Y	EG_transcript_535	N	Y
RCo000646	K00161	Pyruvate metabolism	Carbohydrate metabolism	Pyruvate dehydrogenase E1 component alpha subunit	WP_068497578.1 pyruvate dehydrogenase (acetyl-transferring) E1 component subunit alpha	4.2e-43	Magnetospirillum moscoviense	P16387 Pyruvate dehydrogenase E1 component subunit alpha, mitochondrial S. cerevisiae S288c 2 8P16387	5e-23	ODPA_YEAST	N	N	-	-	Y	EG_transcript_9827	N	Y
RCo009228	K23490	Pyruvate metabolism	Carbohydrate metabolism	Cytochrome b5, nebo fumarate reductase, L-lactate dehydrogenase (cytochrome) dle kegg	XP_021876726.1 FAD binding domain-domain-containing protein	6.8e-15	Lobosporangium transversale	P00175 Cytochrome b2, mitochondrial S. cerevisiae S288c 0 18P00175	4e-12	CYB2_YEAST	N	N	0.799	-	N	-	Y	N
RCo004679	K01069	Pyruvate metabolism	Carbohydrate metabolism	Hydroxyacylglutathione hydrolase	PNR44093.1 hypothetical protein PHYPA_016476	4.7e-50	Physcomitrella patens	Q99KB8 Hydroxyacylglutathione hydrolase, mitochondrial M. musculus 0 17Q99KB8	4e-12	GLO2_MOUSE	Y	N	-	-	Y	EG_transcript_14405	N	Y
RCo004682	K01069	Pyruvate metabolism	Carbohydrate metabolism	Hydroxyacylglutathione hydrolase	PNR44093.1 hypothetical protein PHYPA_016476	2.4e-47	Physcomitrella patens	Q16775 Hydroxyacylglutathione hydrolase, mitochondrial H. sapiens 0 2Q16775	7e-08	GLO2_HUMAN	Y	N	-	-	Y	EG_transcript_14405	N	Y
RCo048567	K01759	Pyruvate metabolism	Carbohydrate metabolism	Lactoylglutathione lyase	WP_076091599.1 VOC family protein	1.6e-61	Azonexus hydrophilus	Q9D1I5 Methylmalonyl-CoA epimerase, mitochondrial M. musculus 0 20Q9D1I5	1e-06	MCEE_MOUSE	Y	N	-	-	Y	EG_transcript_15518	N	Y
RCo024588	-	Pyruvate metabolism	Carbohydrate metabolism	Phosphoenolpyruvate carboxykinase	-	-	-	-	-	-	Y	N	-	-	Y	EG_transcript_41706	N	Y
RCo021255	-	Pyruvate metabolism	Carbohydrate metabolism	Phosphoenolpyruvate synthase	-	-	-	-	-	-	N	N	-	-	Y	EG_transcript_53295	N	Y
RCo004680	K01069	Pyruvate metabolism	Carbohydrate metabolism	Hydroxyacylglutathione hydrolase	PNR44093.1 hypothetical protein PHYPA_016476	9.4e-46	Physcomitrella patens	-	-	-	Y	N	-	-	Y	EG_transcript_14405	N	Y
RCo046420	K01069	Pyruvate metabolism	Carbohydrate metabolism	Hydroxyacylglutathione hydrolase	PKK62370.1 hydroxyacyl glutathione hydrolase	4.1e-65	Rhizophagus irregularis	-	-	-	Y	N	0.625	0.818	N	-	N	N
RCo022174	K00016	Pyruvate metabolism	Carbohydrate metabolism	L-lactate dehydrogenase	WP_104547715.1 L-lactate dehydrogenase	2.6e-89	Chroococcidiopsis sp. TS-821	-	-	-	Y	N	-	-	Y	EG_transcript_12212	N	Y
RCo000819	K00027	Pyruvate metabolism	Carbohydrate metabolism	Malate dehydrogenase (oxaloacetate-decarboxylating)	XP_012754946.1 hypothetical protein SAMD00019534_050210	1.7e-105	Acytostelium subglobosum LB1	-	-	-	N	N	-	-	Y	EG_transcript_4839	N	Y
RCo024479	K01655	Pyruvate metabolism	Carbohydrate metabolism	Homocitrate synthase	XP_001749906.1 hypothetical protein	1.5e-137	Monosiga brevicollis MX1	-	-	-	Y	N	0.92	0.736	Y	EG_transcript_4221	N	Y
RCo012435	K00027	Pyruvate metabolism	Carbohydrate metabolism	Malate dehydrogenase (oxaloacetate-decarboxylating)	KPK49073.1 malate dehydrogenase, partial	5.3e-144	Myxococcales bacterium SG8_38_1	-	-	-	N	N	-	-	Y	EG_transcript_4839	N	Y
RCo021209	K03737	Pyruvate metabolism	Carbohydrate metabolism	Pyruvate: nadp+ oxidoreductase (PNO)	Q94IN5.1 RecName: Full=Pyruvate dehydrogenase	1.3e-149	NADP(+)], mitochondrial; AltName: Full=Aquacobalamin reductase [NADPH]; AltName: Full=EgPNOmt; AltName: Full=Pyruvate:NADP(+) oxidoreductase; Flags: Precursor [Euglena gracilis	-	-	-	N	N	-	-	Y	EG_transcript_2112	N	Y
RCo001269	K11262	Pyruvate metabolism	Carbohydrate metabolism	Acetyl-CoA carboxylase / biotin carboxylase 1	RCI05103.1 acetyl-coenzyme-A carboxylase, partial	2.5e-189	Rhizopus stolonifer	-	-	-	N	N	-	-	Y	EG_transcript_97	N	Y
RCo032638	K03737	Pyruvate metabolism	Carbohydrate metabolism	Pyruvate: nadp+ oxidoreductase (PNO)	Q94IN5.1 RecName: Full=Pyruvate dehydrogenase	1.3e-216	NADP(+)], mitochondrial; AltName: Full=Aquacobalamin reductase [NADPH]; AltName: Full=EgPNOmt; AltName: Full=Pyruvate:NADP(+) oxidoreductase; Flags: Precursor [Euglena gracilis	-	-	-	N	N	-	-	Y	EG_transcript_2112	N	Y
RCo052779	K03737	Pyruvate metabolism	Carbohydrate metabolism	Pyruvate: nadp+ oxidoreductase (PNO)	XP_013418498.1 uncharacterized protein LOC106179427 isoform X2	0	Lingula anatina	-	-	-	Y	N	0.695	-	Y	EG_transcript_2112	N	Y
RCo008357	K03737	Pyruvate metabolism	Carbohydrate metabolism	Pyruvate: nadp+ oxidoreductase (PNO)	BAB12024.1 pyruvate: NADP+ oxidoreductase	0	Euglena gracilis	-	-	-	Y	N	0.764	0.757	Y	EG_transcript_2112	N	Y
RCo004329	K01958	Pyruvate metabolism	Carbohydrate metabolism	Pyruvate carboxylase	XP_019642301.1 PREDICTED: pyruvate carboxylase, mitochondrial-like isoform X3	0	Branchiostoma belcheri	-	-	-	Y	N	0.501	0.82	Y	EG_transcript_12535	N	Y
RCo003309	K00706	Starch and sucrose metabolism	Carbohydrate metabolism	1,3-beta-D-glucan synthase	BAX37083.1 beta-1,3-glucan synthase	0	Euglena gracilis	P40989 1,3-beta-glucan synthase component GSC2 S. cerevisiae S288c 0 1P40989	9e-52	FKS2_YEAST	N	N	-	-	Y	EG_transcript_73	N	Y
RCo029272	K01194	Starch and sucrose metabolism	Carbohydrate metabolism	Trehalase	OJW31956.1 trehalase	6.6e-29	Sphingobacteriales bacterium 46-32	P35172 Probable trehalase S. cerevisiae S288c 1 0P35172	2e-12	TREB_YEAST	N	N	0.776	-	N	-	Y	N
RCo020812	K00705	Starch and sucrose metabolism	Carbohydrate metabolism	4-alpha-glucanotransferase	-	-	-	-	-	-	N	N	0.602	-	Y	EG_transcript_5451	N	Y
RCo022891	K00706	Starch and sucrose metabolism	Carbohydrate metabolism	1,3-beta-D-glucan synthase	BAX37083.1 beta-1,3-glucan synthase	1.9e-227	Euglena gracilis	-	-	-	Y	N	-	-	Y	EG_transcript_73	N	Y
RCo003310	K00706	Starch and sucrose metabolism	Carbohydrate metabolism	1,3-beta-D-glucan synthase	BAX37083.1 beta-1,3-glucan synthase	0	Euglena gracilis	-	-	-	Y	N	-	-	Y	EG_transcript_73	N	Y
RCo039670	K01679	TCA cycle	Carbohydrate metabolism	Fumarate hydratase, class II	WP_160076671.1 class II fumarate hydratase	2e-203	Saprospirales bacterium GYS_P2D	P07954 Fumarate hydratase, mitochondrial H. sapiens 0 12P07954	0	FUMH_HUMAN	Y	Y	-	-	N	-	N	N
RCo034768	K01676	TCA cycle	Carbohydrate metabolism	Fumarate hydratase, class I	XP_030843054.1 uncharacterized protein LOC105447566	2.2e-233	Strongylocentrotus purpuratus	Pygsuia biforma fumarase homologue	0	Pyg_Fum	Y	N	0.826	-	Y	EG_transcript_4764	Y	Y
RCo028846	K01681	TCA cycle	Carbohydrate metabolism	Aconitate hydratase	XP_031500013.1 aconitate hydratase, cytoplasmic	6.2e-137	Nymphaea colorata	Q42560 Aconitate hydratase 1 A. thaliana 0 3Q42560	8e-174	ACO1_ARATH	N	N	-	-	Y	EG_transcript_1951	N	Y
RCo042191	K01900	TCA cycle	Carbohydrate metabolism	Succinyl-CoA synthetase beta subunit	KNE65010.1 succinate-CoA ligase, beta subunit	8.6e-120	Allomyces macrogynus ATCC 38327	Pygsuia biforma Succinyl-CoA beta subinit homologue	2e-148	Pyg_SCSb	Y	N	0.899	0.954	Y	EG_transcript_13259	Y	Y
RCo004576	K00031	TCA cycle	Carbohydrate metabolism	Isocitrate dehydrogenase (NADP+)	WP_126915618.1 NADP-dependent isocitrate dehydrogenase	1.2e-97	Streptomyces luteoverticillatus	P54071 Isocitrate dehydrogenase [NADP], mitochondrial M. musculus 0 29P54071	3e-117	IDHP_MOUSE	Y	N	-	-	Y	EG_transcript_9064	N	Y
RCo019450	K00025	TCA cycle	Carbohydrate metabolism	Malate dehydrogenase	XP_022897211.1 malate dehydrogenase-like isoform X2	3.7e-89	Olea europaea var. sylvestris	P14152 Malate dehydrogenase, cytoplasmic M. musculus 0 18P14152	4e-112	MDHC_MOUSE	Y	N	-	-	Y	EG_transcript_12497	N	Y
RCo009834	K01616	TCA cycle	Carbohydrate metabolism	2-Oxoglutarate decarboxylase, thiamin pyrophosphate-dependent (succinate-semialdehyde-forming)	WP_119166649.1 acetolactate synthase large subunit	5e-189	Rhodospirillaceae bacterium HHTR118	P17597 Acetolactate synthase, chloroplastic A. thaliana 0 1P17597	2e-67	ILVB_ARATH	N	N	-	-	Y	EG_transcript_5376	N	Y
RCo008609	K00239	TCA cycle	Carbohydrate metabolism	Succinate dehydrogenase / fumarate reductase, flavoprotein subunit	CUF04055.1 NADH-dependent fumarate reductase, putative	2.1e-165	Bodo saltans	O13755 Putative fumarate reductase S. pombe 972h- 1 0O13755	1e-66	OSM1_SCHPO	N	N	-	-	N	-	N	N
RCo032279	K00031	TCA cycle	Carbohydrate metabolism	Isocitrate dehydrogenase (NADP+)	SAM01334.1 hypothetical protein	6.9e-53	Absidia glauca	Q8C338 Isocitrate dehydrogenase [NADP] M. musculus 0 13Q8C338	2e-64	Q8C338_MOUSE	N	N	0.558	0.427	N	-	Y	N
RCo050230	K00031	TCA cycle	Carbohydrate metabolism	Isocitrate dehydrogenase (NADP+)	OGQ21626.1 NADP-dependent isocitrate dehydrogenase	1.4e-173	Deltaproteobacteria bacterium RBG_16_71_12	Q7S9K8 Isocitrate dehydrogenase subunit 2, mitochondrial N. crassa OR74A 0 1Q7S9K8	1e-39	Q7S9K8_NEUCR	Y	N	-	-	Y	EG_transcript_10115	N	Y
RCo040025	K00031	TCA cycle	Carbohydrate metabolism	Isocitrate dehydrogenase (NADP+)	XP_001748689.1 hypothetical protein	3.3e-184	Monosiga brevicollis MX1	P28241 Isocitrate dehydrogenase [NAD]subunit 2, mitochondrial S. cerevisiae S288c 3 8P28241	4e-37	IDH2_YEAST	Y	N	0.712	0.948	Y	EG_transcript_10115	Y	Y
RCo007127	K01647	TCA cycle	Carbohydrate metabolism	Citrate synthase	MTJ84082.1 citrate (Si)-synthase	8.4e-182	Telmatospirillum sp.	P34085 Citrate synthase, mitochondrial N. crassa OR74A 0 1P34085	1e-30	CISY_NEUCR	N	N	-	-	Y	EG_transcript_6849	N	Y
RCo012196	K00030	TCA cycle	Carbohydrate metabolism	Isocitrate dehydrogenase (located at the tip of the peripheral stalk of FoF1 ATPase)	6TDV_B Chain B, ATPTB3	6.3e-71	Euglena gracilis	H0YL72 Isocitrate dehydrogenase [NAD]subunit alpha, mitochondrial H. sapiens 0 10H0YL72	7e-08	H0YL72_HUMAN	N	N	-	-	Y	EG_transcript_14428	N	Y
RCo026544	K01647	TCA cycle	Carbohydrate metabolism	Citrate synthase	WP_102438309.1 MULTISPECIES: citrate synthase	1.8e-66	unclassified Shewanella	-	-	-	N	N	-	-	Y	EG_transcript_6849	N	Y
RCo026539	K01647	TCA cycle	Carbohydrate metabolism	Citrate synthase	WP_004274395.1 citrate (Si)-synthase	2.2e-109	Nitrospirillum amazonense	-	-	-	Y	N	0.596	0.457	Y	EG_transcript_6849	N	Y
RCo022592	K01899	TCA cycle	Carbohydrate metabolism	Succinyl-CoA synthetase alpha subunit	KJE93223.1 succinate-CoA ligase	2.7e-113	Capsaspora owczarzaki ATCC 30864	-	-	-	N	N	0.589	0.805	Y	EG_transcript_14424	N	Y
RCo003530	K01682	TCA cycle	Carbohydrate metabolism	Aconitate hydratase 2 / 2-methylisocitrate dehydratase	RUQ35674.1 bifunctional aconitate hydratase 2/2-methylisocitrate dehydratase	1.2e-157	Candidatus Competibacteraceae bacterium	-	-	-	N	N	-	-	Y	EG_transcript_2009	N	Y
RCo007826	K00031	TCA cycle	Carbohydrate metabolism	Isocitrate dehydrogenase (NADP+)	XP_004998141.1 isocitrate dehydrogenase	1.5e-163	Salpingoeca rosetta	-	-	-	Y	N	0.767	-	Y	EG_transcript_10115	N	Y
RCo044158	K01682	TCA cycle	Carbohydrate metabolism	Aconitate hydratase 2 / 2-methylisocitrate dehydratase	WP_111915145.1 MULTISPECIES: bifunctional aconitate hydratase 2/2-methylisocitrate dehydratase	2.3e-196	Gammaproteobacteria	-	-	-	N	N	0.786	0.664	Y	EG_transcript_2009	N	Y
RCo050967	K01676	TCA cycle	Carbohydrate metabolism	Fumarate hydratase, class I	XP_009028259.1 hypothetical protein HELRODRAFT_103347	4e-208	Helobdella robusta	-	-	-	Y	N	-	-	Y	EG_transcript_4764	N	Y
RCo003529	K01682	TCA cycle	Carbohydrate metabolism	Aconitate hydratase 2 / 2-methylisocitrate dehydratase	WP_151031234.1 bifunctional aconitate hydratase 2/2-methylisocitrate dehydratase	0	Cellvibrio sp. KY-GH-1	-	-	-	Y	N	-	-	Y	EG_transcript_2009	N	Y
RCo010765	K06630	Cell cycle	Cell growth and death	14-3-3 protein	ABL84200.1 14-3-3-like protein	1.6e-88	Physarum polycephalum	P62258 14-3-3 protein epsilon H. sapiens 0 1P62258	6e-115	1433E_HUMAN	Y	N	0.793	-	N	-	Y	N
RCo046478	K10133	p53 signaling pathway	Cell growth and death	Tumor protein p53-inducible protein 3	TMB60007.1 NAD(P)H-quinone oxidoreductase	8.2e-33	Deltaproteobacteria bacterium	Q3UNZ8 Quinone oxidoreductase-like protein 2 M. musculus 0 13Q3UNZ8	6e-13	QORL2_MOUSE	Y	N	0.688	-	Y	EG_transcript_24767	Y	Y
RCo038313	K15528	Axon regeneration	Development and regeneration	Fatty acid amide hydrolase	CBJ32713.1 conserved unknown protein	6.6e-48	Ectocarpus siliculosus	O08914 Fatty-acid amide hydrolase 1 M. musculus 0 1O08914	1e-45	FAAH1_MOUSE	N	N	-	-	Y	EG_transcript_6920	N	Y
RCo019656	K14617	Vitamin digestion and absorption	Digestive system	LMBR1 domain-containing protein 1	ORY92301.1 LMBR1-like membrane protein-domain-containing protein	2.9e-51	Syncephalastrum racemosum	-	-	-	Y	N	-	-	Y	EG_transcript_6534	N	Y
RCo006536	K14617	Vitamin digestion and absorption	Digestive system	LMBR1 domain-containing protein 1	KNH09525.1 LMBR1-like conserved region-containing protein	4.8e-93	Perkinsela sp. CCAP 1560/4	-	-	-	N	N	-	-	Y	EG_transcript_8835	N	Y
RCo008610	-	Carbon fixation pathways in prokaryotes	Energy metabolism	NADH-dependent fumarate reductase	PWV12310.1 putative NADH-dependent fumarate reductase	2.1e-148	Trypanosoma cruzi	-	-	-	N	N	-	-	N	-	N	N
RCo019478	K05601	Nitrogen metabolism	Energy metabolism	Hydroxylamine reductase	WP_074768211.1 hydroxylamine reductase	3.9e-132	Phaeospirillum fulvum	Pygsuia biforma hydroxylamine reductase homologue	2e-136	Pyg_HAR	N	N	-	-	Y	EG_transcript_487	N	Y
RCo041359	K01673	Nitrogen metabolism	Energy metabolism	Carbonic anhydrase	WP_012682518.1 carbonic anhydrase	1.1e-31	Gemmatimonas aurantiaca	-	-	-	N	N	-	-	Y	EG_transcript_11777	N	Y
RCo046517	K01673	Nitrogen metabolism	Energy metabolism	Carbonic anhydrase	HAF28622.1 carbonic anhydrase	8e-39	Bacteroidales bacterium	-	-	-	N	N	-	-	Y	EG_transcript_11777	N	Y
RCo002614	K00459	Nitrogen metabolism	Energy metabolism	Nitronate monooxygenase	RYF17315.1 nitronate monooxygenase	2.8e-39	Comamonadaceae bacterium	-	-	-	Y	N	0.679	-	N	-	N	N
RCo047820	K01725	Nitrogen metabolism	Energy metabolism	Cyanate lyase	WP_013320904.1 cyanase	4.3e-49	Gloeothece verrucosa	-	-	-	Y	N	0.934	0.832	Y	EG_transcript_14786	N	Y
RCo044754	K01673	Nitrogen metabolism	Energy metabolism	Carbonic anhydrase	HAC24134.1 carbonic anhydrase	2.2e-53	Cytophagales bacterium	-	-	-	Y	N	-	-	Y	EG_transcript_11777	N	Y
RCo044755	K01673	Nitrogen metabolism	Energy metabolism	Carbonic anhydrase	HAC24134.1 carbonic anhydrase	1.5e-54	Cytophagales bacterium	-	-	-	Y	N	-	-	Y	EG_transcript_11777	N	Y
RCo052956	K01673	Nitrogen metabolism	Energy metabolism	Carbonic anhydrase	WP_112305330.1 carbonic anhydrase	2.3e-61	Pontibacter sp. 2b14	-	-	-	Y	N	0.658	-	Y	EG_transcript_11777	N	Y
RCo052723	K05601	Nitrogen metabolism	Energy metabolism	Hydroxylamine reductase	CUE99497.1 hybrid cluster protein, putative	9.2e-198	Bodo saltans	-	-	-	N	N	-	-	Y	EG_transcript_487	N	Y
RCo052726	K05601	Nitrogen metabolism	Energy metabolism	Hydroxylamine reductase	CUE99497.1 hybrid cluster protein, putative	1.5e-211	Bodo saltans	-	-	-	N	N	-	-	Y	EG_transcript_487	N	Y
RCo031750	K03950	Oxidative phosphorylation	Energy metabolism	Complex I (NADH dehydrogenase) 1 alpha subcomplex subunit 6 (NDUFA6)	-	-	-	P56556 NADH dehydrogenase [ubiquinone]1 alpha subcomplex subunit 6 H. sapiens 0 5P56556	0.0003	NDUA6_HUMAN	N	N	0.659	0.906	Y	EG_transcript_12102	Y	Y
RCo025008	K03942	Oxidative phosphorylation	Energy metabolism	Complex I (NADH dehydrogenase) flavoprotein 1 (NDUFV1)	PHT91785.1 NADH dehydrogenase	1e-189	ubiquinone] flavoprotein 1, mitochondrial, partial [Capsicum annuum	Q9FNN5 NADH dehydrogenase [ubiquinone]flavoprotein 1, mitochondrial A. thaliana 0 1Q9FNN5	0	NDUV1_ARATH	N	N	0.874	0.996	Y	EG_transcript_5944	Y	Y
RCo028832	K02133	Oxidative phosphorylation	Energy metabolism	Complex V (F-type H+-transporting ATPase) subunit beta	6TDY_D Chain D, ATP synthase subunit beta	4.2e-220	Euglena gracilis	P56480 ATP synthase subunit beta, mitochondrial M. musculus 1 31P56480	0	ATPB_MOUSE	N	N	-	-	Y	EG_transcript_8912	N	Y
RCo053789	K00234	Oxidative phosphorylation	Energy metabolism	Complex II (succinate dehydrogenase) flavoprotein subunit (SDH1, SDHA)	ESL07454.1 succinate dehydrogenase flavoprotein	7.8e-266	Trypanosoma rangeli SC58	O82663 Succinate dehydrogenase [ubiquinone]flavoprotein subunit 1, mitochondrial A. thaliana 0 8O82663	0	DHSA1_ARATH	Y	N	0.902	0.825	Y	EG_transcript_6467	Y	Y
RCo027051	K03935	Oxidative phosphorylation	Energy metabolism	Complex I (NADH dehydrogenase) Fe-S subunit 2 (NDUFS2)	QFP99069.1 NADH dehydrogenase subunit 7	1.4e-128	Telonemida sp.	Q9V4E0 LD47962p D. melanogaster 0 1Q9V4E0	4e-158	Q9V4E0_DROME	N	N	0.965	0.993	Y	EG_transcript_13592	Y	Y
RCo031742	K02132	Oxidative phosphorylation	Energy metabolism	Complex V (F-type H+-transporting ATPase) subunit alpha	6TDY_A Chain A, ATP synthase subunit alpha	2.8e-254	Euglena gracilis	Q03265 ATP synthase subunit alpha, mitochondrial M. musculus 1 31Q03265	3e-136	ATPA_MOUSE	Y	N	0.589	0.765	Y	EG_transcript_4714	Y	Y
RCo038740	K03943	Oxidative phosphorylation	Energy metabolism	Complex I (NADH dehydrogenase) flavoprotein 2 (NDUFV2)	XP_002675094.1 predicted protein	8.8e-69	Naegleria gruberi strain NEG-M	O22769 NADH dehydrogenase [ubiquinone]flavoprotein 2, mitochondrial A. thaliana 0 3O22769	2e-73	NDUV2_ARATH	N	N	0.658	0.948	Y	EG_transcript_19472	Y	Y
RCo030299	K01507	Oxidative phosphorylation	Energy metabolism	Inorganic pyrophosphatase	KDD76581.1 inorganic pyrophosphatase	2.3e-64	Helicosporidium sp. ATCC 50920	Q15181 Inorganic pyrophosphatase H. sapiens 0 2Q15181	2e-71	IPYR_HUMAN	Y	N	-	-	Y	EG_transcript_19429	N	Y
RCo053386	K00413	Oxidative phosphorylation	Energy metabolism	Complex III (ubiquinol-cytochrome c reductase) subunit cytochrome c1 (CYC1)	P20114.1 RecName: Full=Cytochrome c1, heme protein; AltName: Full=Complex III subunit 4; AltName: Full=Complex III subunit IV; AltName: Full=Cytochrome b-c1 complex subunit 4; AltName: Full=Ubiquinol-cytochrome-c reductase complex cytochrome c1 subunit; Short=Cytochrome c-1	2.5e-98	Euglena gracilis	P07143 Cytochrome c1, heme protein, mitochondrial S. cerevisiae S288c 3 5P07143	2e-68	CY1_YEAST	N	N	-	-	Y	EG_transcript_21511	N	Y
RCo007989	K02259	Oxidative phosphorylation	Energy metabolism	Complex IV (cytochrome c oxidase) subunit 15 (COX15)	NP_594836.2 cytochrome oxidase cofactor Cox15/type I ferredoxin Etp1 protein etp1	2.9e-51	Schizosaccharomyces pombe	Q10361 Electron transfer protein 1, mitochondrial S. pombe 972h- 1 0Q10361	3e-66	ETP1_SCHPO	N	N	0.925	0.998	Y	EG_transcript_8223	Y	Y
RCo047663	K00411	Oxidative phosphorylation	Energy metabolism	ubiquinol-cytochrome c reductase iron-sulfur subunit	XP_031627758.1 cytochrome b-c1 complex subunit Rieske, mitochondrial-like	8.8e-49	Contarinia nasturtii	P08067 Cytochrome b-c1 complex subunit Rieske, mitochondrial S. cerevisiae S288c 2 7P08067	3e-59	UCRI_YEAST	N	N	0.401	0.843	Y	EG_transcript_23844	Y	Y
RCo010452	K00411	Oxidative phosphorylation	Energy metabolism	Complex III (ubiquinol-cytochrome c reductase) Rieske iron-sulfur subunit (UQCRFS1)	XP_014248104.1 cytochrome b-c1 complex subunit Rieske, mitochondrial	3.9e-46	Cimex lectularius	P07056 Cytochrome b-c1 complex subunit Rieske, mitochondrial N. crassa OR74A 0 1P07056	5e-55	UCRI_NEUCR	N	N	0.867	0.959	Y	EG_transcript_23844	Y	Y
RCo011896	K03941	Oxidative phosphorylation	Energy metabolism	Complex I (NADH dehydrogenase) Fe-S subunit 8 (NDUFS8)	WP_156814323.1 NADH-quinone oxidoreductase subunit NuoI	2.5e-27	Rhodospirillaceae bacterium	Q42599 NADH dehydrogenase [ubiquinone]iron-sulfur protein 8-A, mitochondrial A. thaliana 0 3Q42599	1e-53	NDS8A_ARATH	N	N	0.855	-	Y	EG_transcript_12415	Y	Y
RCo032243	K03934	Oxidative phosphorylation	Energy metabolism	Complex I (NADH dehydrogenase) Fe-S subunit 1 (NDUFS1)	XP_029323360.1 uncharacterized protein C5L36_0D06100	6.4e-45	Pichia kudriavzevii	Q23KA9 NADH-ubiquinone oxidoreductase 75 kDa subunit, mitochondrial, putative T. thermophila SB210 0 1Q23KA9	2e-50	Q23KA9_TETTS	Y	N	0.95	0.884	Y	EG_transcript_12885	Y	Y
RCo005257	K04564	Oxidative phosphorylation	Energy metabolism	Complex I (NADH dehydrogenase) euglenozoa-specific subunit 11	CUF58200.1 iron superoxide dismutase, putative	5e-70	Bodo saltans	Pygsuia biforma Superoxide reductase homologue	8e-48	Pyg_SOD2	N	N	-	-	Y	EG_transcript_19989	N	Y
RCo038917	K03936	Oxidative phosphorylation	Energy metabolism	Complex I (NADH dehydrogenase) Fe-S subunit 3 (NDUFS3)	NP_042261.1 NADH dehydrogenase (ubiquinone), subunit 9	1.3e-37	Prototheca wickerhamii	O75489 NADH dehydrogenase [ubiquinone]iron-sulfur protein 3, mitochondrial H. sapiens 0 10O75489	5e-44	NDUS3_HUMAN	N	N	0.842	0.798	Y	EG_transcript_19403	Y	Y
RCo038504	K03953	Oxidative phosphorylation	Energy metabolism	Complex I (NADH dehydrogenase) 1 alpha subcomplex subunit 9	PDM70137.1 epimerase	1.9e-33	Pristionchus pacificus	Q9DC69 NADH dehydrogenase [ubiquinone]1 alpha subcomplex subunit 9, mitochondrial M. musculus 0 27Q9DC69	7e-39	NDUA9_MOUSE	N	N	-	-	Y	EG_transcript_8914	N	Y
RCo002975	K02257	Oxidative phosphorylation	Energy metabolism	Complex IV (cytochrome c oxidase) subunit 10, protoheme IX farnesyltransferase (COX10)	XP_024395445.1 protoheme IX farnesyltransferase, mitochondrial-like	1.7e-44	Physcomitrella patens	Q9Y7Y4 Protoheme IX farnesyltransferase, mitochondrial S. pombe 972h- 1 0Q9Y7Y4	2e-34	COX10_SCHPO	N	N	-	-	Y	EG_transcript_19356	N	Y
RCo045239	K02258	Oxidative phosphorylation	Energy metabolism	Complex IV (cytochrome c oxidase) subunit 11 (COX11)	EPY26421.1 cytochrome c oxidase assembly protein subunit 11	2.5e-27	Angomonas deanei	P19516 Cytochrome c oxidase assembly protein COX11, mitochondrial S. cerevisiae S288c 1 3P19516	8e-33	COX11_YEAST	N	N	-	-	Y	EG_transcript_18631	N	Y
RCo019649	K00235	Oxidative phosphorylation	Energy metabolism	Complex II (succinate dehydrogenase) iron-sulfur subunit (SDH2, SDHB), N-end	KNH04881.1 electron transfer protein	1.8e-34	Perkinsela sp. CCAP 1560/4	Q8LB02 Succinate dehydrogenase [ubiquinone]iron-sulfur subunit 2, mitochondrial A. thaliana 0 1Q8LB02	6e-28	DHSB2_ARATH	N	N	-	-	Y	EG_transcript_25720	N	Y
RCo043843	K02134	Oxidative phosphorylation	Energy metabolism	Complex V (F-type H+-transporting ATPase) subunit delta	6TDX_H Chain H, F-type H+-transporting ATPase subunit delta	2.5e-48	Euglena gracilis	Q96252 ATP synthase subunit delta', mitochondrial A. thaliana 0 3Q96252	2e-22	ATP4_ARATH	N	N	0.517	-	Y	EG_transcript_32956	Y	Y
RCo040056	K03955	Oxidative phosphorylation	Energy metabolism	Complex I (NADH dehydrogenase) 1 alpha/beta subcomplex 1	XP_029231419.1 acyl carrier protein, mitochondrial precursor	8.5e-17	Trypanosoma conorhini	Q10217 Putative acyl carrier protein, mitochondrial S. pombe 972h- 1 0Q10217	2e-21	ACPM_SCHPO	N	N	0.855	0.998	Y	EG_transcript_41155	Y	Y
RCo002977	K00235	Oxidative phosphorylation	Energy metabolism	Complex II (succinate dehydrogenase) iron-sulfur subunit (SDH2, SDHB), C-end	CCC92804.1 putative succinate dehydrogenase	2.9e-19	Trypanosoma congolense IL3000	Q9CQA3 Succinate dehydrogenase [ubiquinone]iron-sulfur subunit, mitochondrial M. musculus 1 25Q9CQA3	2e-21	DHSB_MOUSE	Y	N	0.831	-	Y	EG_transcript_33323	Y	Y
RCo040055	K03955	Oxidative phosphorylation	Energy metabolism	Complex I (NADH dehydrogenase) 1 alpha/beta subcomplex 1 (NDUFAB1)	XP_029231419.1 acyl carrier protein, mitochondrial precursor	1.5e-18	Trypanosoma conorhini	O80800 Acyl carrier protein 2, mitochondrial A. thaliana 0 2O80800	5e-20	ACPM2_ARATH	N	N	0.855	0.998	Y	EG_transcript_41155	Y	Y
RCo016340	K03953	Oxidative phosphorylation	Energy metabolism	Complex I (NADH dehydrogenase) 1 alpha subcomplex subunit 9 (NDUFA9)	MBK19010.1 complex I NDUFA9 subunit family protein	4.2e-33	Rhodospirillaceae bacterium	P25284 NADH-ubiquinone oxidoreductase 40 kDa subunit, mitochondrial N. crassa OR74A 0 1P25284	1e-19	NDUA9_NEUCR	N	N	0.831	0.894	Y	EG_transcript_19719	Y	Y
RCo049359	-	Oxidative phosphorylation	Energy metabolism	Complex I (NADH dehydrogenase) subunit, LYR family protein	XP_002735143.1 PREDICTED: LYR motif containing protein 1-like	4.4e-11	Saccoglossus kowalevskii	Q9CQB7 LYR motif-containing protein 1 M. musculus 0 5Q9CQB7	7e-15	LYRM1_MOUSE	Y	N	-	-	N	-	N	N
RCo003852	K02136	Oxidative phosphorylation	Energy metabolism	Complex V (F-type H+-transporting ATPase) subunit gamma	6TDX_G Chain G, ATP synthase F1 subunit gamma	2.2e-115	Euglena gracilis	O74754 ATP synthase subunit gamma, mitochondrial S. pombe 972h- 1 0O74754	2e-14	ATPG_SCHPO	N	N	-	-	Y	EG_transcript_19235	N	Y
RCo044989	K03949	Oxidative phosphorylation	Energy metabolism	Complex I (NADH dehydrogenase) 1 alpha subcomplex subunit 5 (NDUFA5)	XP_023769452.1 probable NADH dehydrogenase	5.7e-18	ubiquinone] 1 alpha subcomplex subunit 5, mitochondrial [Lactuca sativa	Q16718 NADH dehydrogenase [ubiquinone]1 alpha subcomplex subunit 5 H. sapiens 0 9Q16718	8e-11	NDUA5_HUMAN	Y	N	0.956	0.998	Y	EG_transcript_24541	Y	Y
RCo006291	K00417	Oxidative phosphorylation	Energy metabolism	Complex III (ubiquinol-cytochrome c reductase) subunit 7 (QCR7)	XP_002672796.1 predicted protein	2e-10	Naegleria gruberi strain NEG-M	Q9D855 Cytochrome b-c1 complex subunit 7 M. musculus 0 21Q9D855	3e-07	QCR7_MOUSE	N	N	-	-	Y	EG_transcript_13997	N	Y
RCo033724	K00406	Oxidative phosphorylation	Energy metabolism	Complex IV (cytochrome c oxidase) subunit 3	WP_114448040.1 heme-copper oxidase subunit III	4.1e-06	Haloplanus salinus	Q7JCX7 Cytochrome c oxidase subunit 3 M. musculus 0 14Q7JCX7	1e-05	Q7JCX7_MOUSE	N	N	0.962	0.999	Y	EG_transcript_36506	Y	Y
RCo045950	-	Oxidative phosphorylation	Energy metabolism	Complex II (succinate dehydrogenase) euglenozoa-specific subunit 6	-	-	-	-	-	-	N	N	0.456	0.467	Y	EG_transcript_22111	N	Y
RCo040399	K03952	Oxidative phosphorylation	Energy metabolism	Complex I (NADH dehydrogenase) 1 alpha subcomplex subunit 8 (NDUFA8)	-	-	-	-	-	-	Y	N	-	-	Y	EG_transcript_27781	N	Y
RCo022638	K03946	Oxidative phosphorylation	Energy metabolism	Complex I (NADH dehydrogenase) 1 alpha subcomplex subunit 2 (NDUFA2)	-	-	-	-	-	-	N	N	-	-	Y	EG_transcript_28989	N	Y
RCo032798	K11353	Oxidative phosphorylation	Energy metabolism	Complex I (NADH dehydrogenase) 1 alpha subcomplex subunit 13 (NDUFA13)	-	-	-	-	-	-	N	N	-	-	Y	EG_transcript_33225	N	Y
RCo019655	-	Oxidative phosphorylation	Energy metabolism	Complex V (F-type H+-transporting ATPase) F1 inhibitor	-	-	-	-	-	-	Y	N	0.761	-	Y	EG_transcript_49190	N	Y
RCo016641	-	Oxidative phosphorylation	Energy metabolism	Complex I (NADH dehydrogenase) 1 beta subcomplex 10 (NDUFB10)	-	-	-	-	-	-	N	N	-	-	Y	EG_transcript_29565	N	Y
RCo016868	-	Oxidative phosphorylation	Energy metabolism	Complex I (NADH dehydrogenase) Fe-S subunit 6 (NDUFS6)	-	-	-	-	-	-	N	N	0.867	0.481	Y	EG_transcript_52520	N	Y
RCo055104	-	Oxidative phosphorylation	Energy metabolism	Complex II (succinate dehydrogenase) euglenozoa-specific subunit 9	-	-	-	-	-	-	N	N	-	-	N	-	N	N
RCo055105	-	Oxidative phosphorylation	Energy metabolism	Complex II (succinate dehydrogenase) euglenozoa-specific subunit 9	-	-	-	-	-	-	N	N	-	-	N	-	N	N
RCo008207	-	Oxidative phosphorylation	Energy metabolism	Complex IV (cytochrome c oxidase) euglenozoa-specific subunit 2	-	-	-	-	-	-	N	N	-	-	N	-	N	N
RCo010230	-	Oxidative phosphorylation	Energy metabolism	Complex V (F-type H+-transporting ATPase) euglenozoa-specific subunit 1	-	-	-	-	-	-	N	N	-	-	N	-	N	N
RCo009383	K02136	Oxidative phosphorylation	Energy metabolism	Complex V (F-type H+-transporting ATPase) subunit gamma	-	-	-	-	-	-	N	N	-	-	N	-	N	N
RCo030000	K02137	Oxidative phosphorylation	Energy metabolism	Complex V (F-type H+-transporting ATPase) subunit OSCP	-	-	-	-	-	-	N	N	-	-	N	-	N	N
RCo038039	-	Oxidative phosphorylation	Energy metabolism	Complex V (F-type H+-transporting ATPase) euglenozoa-specific subunit p18, universal minicircle sequence binding protein	GBG79953.1 hypothetical protein CBR_g30215	0.00022	Chara braunii	-	-	-	N	N	-	-	N	-	N	N
RCo048267	-	Oxidative phosphorylation	Energy metabolism	Complex III (ubiquinol-cytochrome c reductase) subunit 9 (QCR9)	P43266.1 RecName: Full=Ubiquinol-cytochrome-C reductase complex subunit IX, mitochondrial; Flags: Precursor	7.9e-05	Euglena gracilis	-	-	-	N	N	0.537	0.654	Y	EG_transcript_57369	N	Y
RCo045240	K02258	Oxidative phosphorylation	Energy metabolism	Complex IV (cytochrome c oxidase) subunit 11 (COX11)	EPY26421.1 cytochrome c oxidase assembly protein subunit 11	1.6e-05	Angomonas deanei	-	-	-	Y	N	-	-	Y	EG_transcript_18631	N	Y
RCo000362	-	Oxidative phosphorylation	Energy metabolism	Complex I (NADH dehydrogenase) subunit, LVR family protein	PWY97545.1 hypothetical protein BCV70DRAFT_166699	8.3e-07	Testicularia cyperi	-	-	-	Y	N	-	-	Y	EG_transcript_29641	N	Y
RCo024488	K11352	Oxidative phosphorylation	Energy metabolism	Complex I (NADH dehydrogenase) 1 alpha subcomplex subunit 12 (NDUFA12)	XP_021846306.1 probable NADH dehydrogenase	1.1e-07	ubiquinone] 1 alpha subcomplex subunit 12 [Spinacia oleracea	-	-	-	N	N	0.79	0.952	Y	EG_transcript_19840	N	Y
RCo025304	K02264	Oxidative phosphorylation	Energy metabolism	Complex IV (cytochrome c oxidase) subunit 5 (COX5a, COXVa, COX6)	CCD14668.1 unnamed protein product	9.2e-13	Trypanosoma congolense IL3000	-	-	-	N	N	0.668	-	Y	EG_transcript_34143	N	Y
RCo049527	-	Oxidative phosphorylation	Energy metabolism	Complex I (NADH dehydrogenase) euglenozoa-specific subunit 12, phosphoenolpyruvate carboxykinase	CUF91205.1 Hypothetical protein, putative	3.7e-13	Bodo saltans	-	-	-	N	N	-	-	Y	EG_transcript_10882	N	Y
RCo007870	-	Oxidative phosphorylation	Energy metabolism	Complex I (NADH dehydrogenase) euglenozoa-specific subunit 17	RHW71834.1 AMP-binding enzyme	1.7e-13	Trypanosoma brucei equiperdum	-	-	-	N	N	0.89	0.977	Y	EG_transcript_9915	N	Y
RCo021244	-	Oxidative phosphorylation	Energy metabolism	Complex IV (cytochrome c oxidase) euglenozoa-specific subunit 4	AAF13293.1 cytochrome c oxidase subunit IV, partial	3.7e-14	Leishmania tarentolae	-	-	-	N	N	0.783	0.86	Y	EG_transcript_35473	N	Y
RCo036393	-	Oxidative phosphorylation	Energy metabolism	Complex V (F-type H+-transporting ATPase) subunit k	6TDV_K Chain K, subunit k	4.9e-16	Euglena gracilis	-	-	-	N	N	0.576	-	Y	EG_transcript_55785	N	Y
RCo034633	-	Oxidative phosphorylation	Energy metabolism	Complex II (succinate dehydrogenase) euglenozoa-specific subunit 8	CUE75993.1 membrane-associated protein, putative	1.5e-16	Bodo saltans	-	-	-	N	N	-	-	Y	EG_transcript_41526	N	Y
RCo008433	-	Oxidative phosphorylation	Energy metabolism	Complex V (F-type H+-transporting ATPase) euglena-specific subunit 4	6TDV_P Chain P, ATPEG4	1.1e-16	Euglena gracilis	-	-	-	Y	N	-	-	Y	EG_transcript_49361	N	Y
RCo002932	-	Oxidative phosphorylation	Energy metabolism	Complex II (succinate dehydrogenase) euglenozoa-specific subunit 7	CUG06687.1 Hypothetical protein, putative	3.6e-24	Bodo saltans	-	-	-	Y	N	0.947	0.945	Y	EG_transcript_24694	N	Y
RCo043727	-	Oxidative phosphorylation	Energy metabolism	Complex V (F-type H+-transporting ATPase) euglenozoa-specific subunit 4	6TDW_C Chain C, ATPTB4	9.4e-30	Euglena gracilis	-	-	-	N	N	-	-	Y	EG_transcript_60280	N	Y
RCo009192	-	Oxidative phosphorylation	Energy metabolism	Complex V (F-type H+-transporting ATPase) euglena-specific subunit 3	6TDV_O Chain O, ATPEG3	3.1e-31	Euglena gracilis	-	-	-	Y	N	-	-	Y	EG_transcript_56559	N	Y
RCo025170	-	Oxidative phosphorylation	Energy metabolism	Complex V (F-type H+-transporting ATPase) euglena-specific subunit 2	6TDV_N Chain N, ATPEG2	1.1e-34	Euglena gracilis	-	-	-	N	N	-	-	Y	EG_transcript_33701	N	Y
RCo020874	K02267	Oxidative phosphorylation	Energy metabolism	Complex IV (cytochrome c oxidase) subunit 6 (COX6b, COX12)	XP_024539570.1 uncharacterized protein LOC112349407	6.8e-37	Selaginella moellendorffii	-	-	-	N	N	-	-	N	-	N	N
RCo038104	-	Oxidative phosphorylation	Energy metabolism	Complex V (F-type H+-transporting ATPase) euglena-specific subunit 1	6TDX_0 Chain 0, ATPEG1	5.7e-44	Euglena gracilis	-	-	-	N	N	-	-	Y	EG_transcript_36580	N	Y
RCo007990	K02259	Oxidative phosphorylation	Energy metabolism	Complex IV (cytochrome c oxidase) subunit 15 (COX15)	NP_594836.2 cytochrome oxidase cofactor Cox15/type I ferredoxin Etp1 protein etp1	3.7e-44	Schizosaccharomyces pombe	-	-	-	N	N	-	-	Y	EG_transcript_8223	N	Y
RCo005419	-	Oxidative phosphorylation	Energy metabolism	Complex I (NADH dehydrogenase) euglenozoa-specific subunit 29	CUE91196.1 Hypothetical protein, putative	6e-50	Bodo saltans	-	-	-	N	N	-	-	N	-	N	N
RCo022242	-	Oxidative phosphorylation	Energy metabolism	Complex V (F-type H+-transporting ATPase) euglenozoa-specific subunit 6	6TDV_D Chain D, ATPTB6	1.5e-52	Euglena gracilis	-	-	-	Y	N	-	-	Y	EG_transcript_28774	N	Y
RCo022840	-	Oxidative phosphorylation	Energy metabolism	Complex V (F-type H+-transporting ATPase) subunit OSCP	6TDW_M Chain M, oligomycin sensitivity conferrring protein (OSCP)	4.5e-53	Euglena gracilis	-	-	-	N	N	0.938	0.984	Y	EG_transcript_18009	N	Y
RCo055725	K03940	Oxidative phosphorylation	Energy metabolism	Complex I (NADH dehydrogenase) Fe-S subunit 7 (NDUFS7)	MSO53624.1 NADH-quinone oxidoreductase subunit B	3e-57	Rhodospirillales bacterium	-	-	-	Y	N	-	-	Y	EG_transcript_32395	N	Y
RCo004248	-	Oxidative phosphorylation	Energy metabolism	Complex V (F-type H+-transporting ATPase) euglenozoa-specific subunit p18	6TDY_J Chain J, p18	1.1e-69	Euglena gracilis	-	-	-	N	N	0.743	0.77	Y	EG_transcript_41871	N	Y
RCo038710	-	Oxidative phosphorylation	Energy metabolism	Complex V (F-type H+-transporting ATPase) subunit d	6TDV_H Chain H, subunit d	4.8e-83	Euglena gracilis	-	-	-	Y	N	-	-	Y	EG_transcript_12457	N	Y
RCo027646	-	Oxidative phosphorylation	Energy metabolism	Complex V (F-type H+-transporting ATPase) euglenozoa-specific subunit 1	6TDV_A Chain A, ATPTB1	4.4e-144	Euglena gracilis	-	-	-	N	N	0.792	0.726	Y	EG_transcript_7573	N	Y
RCo049652	K00958	Sulfur metabolism	Energy metabolism	Sulfate adenylyltransferase (ATP sulfurylase) (sat)	QDZ22875.1 sulfate adenylyltransferase	5e-144	Chloropicon primus	sulfate adenylyltransferase	1e-37	Ehis_XP_653570	N	N	0.469	0.605	Y	EG_transcript_12509	Y	Y
RCo011997	K00860	Sulfur metabolism	Energy metabolism	Adenylylsulfate kinase (CysC)	MAE59764.1 adenylyl-sulfate kinase	8.2e-72	Planctomycetaceae bacterium	sulfate adenylyltransferase	1e-36	Ehis_XP_656278	Y	N	0.884	0.998	Y	EG_transcript_68647	Y	Y
RCo010220	K00387	Sulfur metabolism	Energy metabolism	Sulfite oxidase	XP_015907746.1 sulfite oxidase	6.1e-33	Parasteatoda tepidariorum	P51687 Sulfite oxidase, mitochondrial H. sapiens 0 1P51687	4e-35	SUOX_HUMAN	N	N	0.757	0.966	N	-	Y	N
RCo000455	K01011	Sulfur metabolism	Energy metabolism	Thiosulfate/3-mercaptopyruvate sulfurtransferase	WP_101849457.1 sulfurtransferase	2.6e-17	Kytococcus schroeteri	J3KPV7 Sulfurtransferase H. sapiens 0 2J3KPV7	6e-12	J3KPV7_HUMAN	N	N	0.604	-	Y	EG_transcript_26179	Y	Y
RCo028719	K01011	Sulfur metabolism	Energy metabolism	Thiosulfate/3-mercaptopyruvate sulfurtransferase	WP_047967929.1 sulfurtransferase	3.6e-24	Vogesella sp. EB	-	-	-	Y	N	-	-	Y	EG_transcript_26179	N	Y
RCo038863	K01011	Sulfur metabolism	Energy metabolism	Thiosulfate/3-mercaptopyruvate sulfurtransferase	WP_070073776.1 sulfurtransferase	2.3e-64	Acidihalobacter prosperus	-	-	-	Y	N	-	-	Y	EG_transcript_26179	N	Y
RCo000499	K00640	Sulfur metabolism	Energy metabolism	Serine O-acetyltransferase	KAF0222375.1 hypothetical protein FD176_2697	2.4e-67	Rhodospirillaceae bacterium	-	-	-	N	N	-	-	Y	EG_transcript_11445	N	Y
RCo042343	K00640	Sulfur metabolism	Energy metabolism	Serine O-acetyltransferase	MAE64503.1 serine acetyltransferase	1.4e-69	Phycisphaeraceae bacterium	-	-	-	Y	N	-	-	Y	EG_transcript_11445	N	Y
RCo028429	K00640	Sulfur metabolism	Energy metabolism	Serine O-acetyltransferase	MAE64503.1 serine acetyltransferase	1.2e-70	Phycisphaeraceae bacterium	-	-	-	N	N	-	-	Y	EG_transcript_11445	N	Y
RCo041125	K16185	Signal transduction	Environmental Information Processing	Ras-related GTP-binding protein A/B	XP_020433328.1 Ras-related GTP-binding protein	8.8e-117	Heterostelium album PN500	| organism=Trichomonas_vaginalis_G3 | product=small GTPase RAB, putative | location=DS113250:56707-57294(+) | length=196	6e-05	TVAG_159810	Y	N	0.82	-	N	-	Y	N
RCo011114	K02726	Proteasome	Folding, sorting and degradation	20S proteasome subunit alpha 2	XP_002675300.1 predicted protein	1.1e-92	Naegleria gruberi strain NEG-M	-	-	-	Y	N	-	-	Y	EG_transcript_22055	N	Y
RCo011946	K08288	Protein processing in endoplasmic reticulum	Folding, sorting and degradation	Protein kinase C substrate 80K-H	CUE70784.1 glucosidase II beta subunit, putative	1.5e-15	Bodo saltans	P14314 Glucosidase 2 subunit beta H. sapiens 0 1P14314	2e-16	GLU2B_HUMAN	N	N	0.542	-	N	-	Y	N
RCo005383	K04077	RNA degradation	Folding, sorting and degradation	Chaperonin GroEL, HSP60, mitochondrial	CAA65238.1 heat shock protein 60, partial	4.5e-171	Euglena gracilis	-	-	-	N	N	0.694	0.988	Y	EG_transcript_7178	N	Y
RCo005843	K04077	RNA degradation	Folding, sorting and degradation	Chaperonin GroEL, HSP60, mitochondrial	CAA65238.1 heat shock protein 60, partial	3.6e-233	Euglena gracilis	-	-	-	N	N	-	-	Y	EG_transcript_7178	N	Y
RCo005918	K12666	N-Glycan biosynthesis	Glycan biosynthesis and metabolism	Oligosaccharyltransferase complex subunit alpha (Ribophorin I)	XP_020606448.1 dolichyl-diphosphooligosaccharide--protein glycosyltransferase subunit 1-like	1.9e-39	Orbicella faveolata	Q91YQ5 Dolichyl-diphosphooligosaccharide--protein glycosyltransferase subunit 1 M. musculus 0 6Q91YQ5	5e-38	RPN1_MOUSE	N	N	0.556	-	N	-	Y	N
RCo032928	K05894	alpha-Linolenic acid metabolism	Lipid metabolism	Alkene reductase	WP_053377962.1 alkene reductase	6.9e-92	Nitrospira moscoviensis	-	-	-	Y	Y	-	-	Y	EG_transcript_11688	N	Y
RCo005910	K00432	Arachidonic acid metabolism	Lipid metabolism	Trypanothione/tryparedoxin dependent peroxidase 2, glutathione peroxidase-like 2 (TDPX2)	WP_008951789.1 glutathione peroxidase	9.9e-44	Alishewanella jeotgali	O70325 Phospholipid hydroperoxide glutathione peroxidase, mitochondrial M. musculus 0 17O70325	4e-32	GPX41_MOUSE	Y	N	-	-	N	-	N	N
RCo050484	K05309	Arachidonic acid metabolism	Lipid metabolism	Microsomal prostaglandin-E synthase 2	-	-	-	-	-	-	Y	N	0.741	0.755	Y	EG_transcript_15226	N	Y
RCo014525	K00432	Arachidonic acid metabolism	Lipid metabolism	Trypanothione/tryparedoxin dependent peroxidase 2, glutathione peroxidase-like 2 (TDPX2)	GAV80081.1 GSHPx domain-containing protein	7e-35	Cephalotus follicularis	-	-	-	Y	N	-	-	Y	EG_transcript_21143	N	Y
RCo012480	K05309	Arachidonic acid metabolism	Lipid metabolism	Microsomal prostaglandin-E synthase 2	XP_013761652.1 glutaredoxin family protein	7e-39	Thecamonas trahens ATCC 50062	-	-	-	Y	N	-	-	Y	EG_transcript_19995	N	Y
RCo005911	K00432	Arachidonic acid metabolism	Lipid metabolism	Trypanothione/tryparedoxin dependent peroxidase 2, glutathione peroxidase-like 2 (TDPX2)	WP_008951789.1 glutathione peroxidase	1.1e-43	Alishewanella jeotgali	-	-	-	Y	N	0.55	0.725	Y	EG_transcript_21143	N	Y
RCo036298	K00432	Arachidonic acid metabolism	Lipid metabolism	Trypanothione/tryparedoxin dependent peroxidase 2, glutathione peroxidase-like 2 (TDPX2)	WP_062316616.1 glutathione peroxidase	2.3e-47	Bradyrhizobium sp. CCH10-C7	-	-	-	Y	N	-	-	Y	EG_transcript_21143	N	Y
RCo027645	K05309	Arachidonic acid metabolism	Lipid metabolism	Microsomal prostaglandin-E synthase 2	EKF98465.1 hypothetical protein TCSYLVIO_010637	5.5e-49	Trypanosoma cruzi	-	-	-	N	N	0.682	-	Y	EG_transcript_19995	N	Y
RCo031435	K00059	Fatty acid biosynthesis	Lipid metabolism	3-oxoacyl-[acyl-carrier protein] reductase	WP_107802410.1 SDR family oxidoreductase	1.9e-60	Nitrosomonas oligotropha	P40471 NADPH-dependent 1-acyldihydroxyacetone phosphate reductase S. cerevisiae S288c 0 7P40471	2e-13	AYR1_YEAST	Y	N	0.634	0.695	N	-	Y	N
RCo027454	K18660	Fatty acid biosynthesis	Lipid metabolism	Malonyl-CoA/methylmalonyl-CoA synthetase	XP_031027242.1 uncharacterized protein SmJEL517_g00793	6.4e-15	Synchytrium microbalum	Q4G176 Acyl-CoA synthetase family member 3, mitochondrial H. sapiens 0 1Q4G176	2e-09	ACSF3_HUMAN	Y	N	0.951	0.998	N	-	Y	N
RCo016397	K08766	Fatty acid degradation	Lipid metabolism	Carnitine O-palmitoyltransferase 2	TMW63356.1 hypothetical protein Poli38472_002297	1e-113	Pythium oligandrum	P23786 Carnitine O-palmitoyltransferase 2, mitochondrial H. sapiens 0 5P23786	7e-93	CPT2_HUMAN	Y	N	0.82	0.982	Y	EG_transcript_4462	Y	Y
RCo011993	K00626	Fatty acid degradation	Lipid metabolism	Acetyl-CoA acyltransferase 2	OLS15498.1 protein AtoB1	4.5e-150	Candidatus Lokiarchaeota archaeon CR_4	P42765 3-ketoacyl-CoA thiolase, mitochondrial H. sapiens 0 8P42765	9e-84	THIM_HUMAN	N	N	0.721	-	Y	EG_transcript_10443	Y	Y
RCo008998	K08765	Fatty acid degradation	Lipid metabolism	Carnitine O-palmitoyltransferase 1	TYZ67113.1 hypothetical protein PybrP1_005370	5e-76	Pythium brassicum	P50416 Carnitine O-palmitoyltransferase 1, liver isoform H. sapiens 0 2P50416	5e-80	CPT1A_HUMAN	N	N	-	-	Y	EG_transcript_1929	N	Y
RCo015312	K00248	Fatty acid degradation	Lipid metabolism	Long-chain acyl-CoA synthetase	GBG30027.1 Long-chain-fatty-acid--CoA ligase, putative	2.7e-76	Hondaea fermentalgiana	P33121 Long-chain-fatty-acid--CoA ligase 1 H. sapiens 0 3P33121	2e-76	ACSL1_HUMAN	N	N	0.765	-	N	-	Y	N
RCo034850	K13238	Fatty acid degradation	Lipid metabolism	Delta-3-Delta-2-enoyl-CoA isomerase	MAG57635.1 enoyl-CoA hydratase	1.1e-28	Planctomycetes bacterium	P42125 Enoyl-CoA delta isomerase 1, mitochondrial M. musculus 0 28P42125	1e-15	ECI1_MOUSE	N	N	0.443	0.68	N	-	Y	N
RCo023791	K13953	Fatty acid degradation	Lipid metabolism	Alcohol dehydrogenase, propanol-preferring	QDZ18448.1 alcohol dehydrogenase	9.3e-71	Chloropicon primus	-	-	-	N	N	-	-	Y	EG_transcript_13473	N	Y
RCo029909	K00248	Fatty acid degradation	Lipid metabolism	Acyl-CoA dehydrogenase - short chain specific	XP_009038858.1 hypothetical protein AURANDRAFT_60198	2e-90	Aureococcus anophagefferens	-	-	-	N	N	-	-	Y	EG_transcript_12101	N	Y
RCo051372	K01897	Fatty acid degradation	Lipid metabolism	Long-chain acyl-CoA synthetase	CUE62514.1 fatty acyl CoA synthetase 3, putative	4e-133	Bodo saltans	-	-	-	Y	N	-	-	Y	EG_transcript_2914	N	Y
RCo044731	K07515	Fatty acid elongation	Lipid metabolism	Enoyl-CoA hydratase / long-chain 3-hydroxyacyl-CoA dehydrogenase	EPY39249.1 3-hydroxyacyl-CoA dehydrogenase	1.1e-192	Angomonas deanei	P40939 Trifunctional enzyme subunit alpha, mitochondrial H. sapiens 0 10P40939	3e-120	ECHA_HUMAN	Y	N	0.94	0.969	Y	EG_transcript_3075	Y	Y
RCo014632	K00022	Fatty acid elongation	Lipid metabolism	3-hydroxyacyl-CoA dehydrogenase	AAO72312.1 L-3-hydroxyacyl-CoA dehydrogenase subunit precursor	1.4e-101	Euglena gracilis	Q61425 Hydroxyacyl-coenzyme A dehydrogenase, mitochondrial M. musculus 0 27Q61425	3e-92	HCDH_MOUSE	N	N	-	-	Y	EG_transcript_21457	N	Y
RCo038684	K07509	Fatty acid elongation	Lipid metabolism	Acetyl-CoA acyltransferase	KAF0983092.1 hypothetical protein FDP41_011070	8e-127	Naegleria fowleri	Q99JY0 Trifunctional enzyme subunit beta, mitochondrial M. musculus 0 25Q99JY0	2e-90	ECHB_MOUSE	Y	N	-	-	Y	EG_transcript_13053	N	Y
RCo016455	K07511	Fatty acid elongation	Lipid metabolism	Enoyl-CoA hydratase	KXS18728.1 ClpP/crotonase	3.9e-46	Gonapodya prolifera JEL478	Pygsuia biforma HTD2	1e-52	Pyg_HTD2	Y	N	0.624	-	N	-	Y	N
RCo048574	K07512	Fatty acid elongation	Lipid metabolism	Trans-2-enoyl-CoA reductase	WP_034210589.1 zinc-dependent alcohol dehydrogenase family protein	1.7e-34	Arenimonas metalli	Q9BV79 Trans-2-enoyl-CoA reductase, mitochondrial H. sapiens 0 2Q9BV79	1e-40	MECR_HUMAN	N	N	-	-	N	-	N	N
RCo002785	K07511	Fatty acid elongation	Lipid metabolism	Enoyl-CoA hydratase	WP_146851774.1 crotonase/enoyl-CoA hydratase family protein	1.5e-45	Frigoribacterium faeni	Q8BH95 Enoyl-CoA hydratase, mitochondrial M. musculus 0 29Q8BH95	6e-24	ECHM_MOUSE	Y	N	0.568	0.451	Y	EG_transcript_12970	Y	Y
RCo040998	K07511	Fatty acid elongation	Lipid metabolism	Enoyl-CoA hydratase	XP_004335737.1 enoylCoA hydratase/isomerase family domain containing protein	6.6e-49	Acanthamoeba castellanii str. Neff	P30084 Enoyl-CoA hydratase, mitochondrial H. sapiens 0 10P30084	3e-23	ECHM_HUMAN	Y	N	0.527	-	N	-	Y	N
RCo004691	K17360	Fatty acid elongation	Lipid metabolism	Acyl-coenzyme A thioesterase 7	KXJ08244.1 Cytosolic acyl coenzyme A thioester hydrolase	1.5e-07	Exaiptasia pallida	E9PYH2 Cytosolic acyl coenzyme A thioester hydrolase M. musculus 0 3E9PYH2	2e-12	E9PYH2_MOUSE	Y	N	0.914	0.928	N	-	Y	N
RCo048015	K07512	Fatty acid elongation	Lipid metabolism	Trans-2-enoyl-CoA reductase	GAY02223.1 trans-2-enoyl-CoA reductase, putative	9.4e-32	Pythium insidiosum	-	-	-	Y	N	0.677	-	Y	EG_transcript_10773	N	Y
RCo008538	K17360	Fatty acid elongation	Lipid metabolism	Acyl-coenzyme A thioesterase 7	XP_003384841.1 PREDICTED: cytosolic acyl coenzyme A thioester hydrolase-like	1.3e-47	Amphimedon queenslandica	-	-	-	Y	N	-	-	N	-	N	N
RCo030891	K07511	Fatty acid elongation	Lipid metabolism	Enoyl-CoA hydratase	XP_028887524.1 putative enoyl-CoA hydratase, mitochondrial precursor	1.6e-72	Trypanosoma theileri	-	-	-	Y	N	0.792	0.686	Y	EG_transcript_21797	N	Y
RCo039229	K00022	Fatty acid elongation	Lipid metabolism	3-hydroxyacyl-CoA dehydrogenase	GAY04010.1 hydroxyacyl-coenzyme A dehydrogenase, mitochondrial precursor	6.3e-76	Pythium insidiosum	-	-	-	Y	N	-	-	Y	EG_transcript_21457	N	Y
RCo035370	K00626	Fatty acid metabolism	Lipid metabolism	Acetyl-CoA acyltransferase 2	BAR71479.1 putative 3-ketoacyl-CoA thiolase	6.1e-145	Euglena gracilis	Q8QZT1 Acetyl-CoA acetyltransferase, mitochondrial M. musculus 0 30Q8QZT1	3e-110	THIL_MOUSE	Y	N	-	-	Y	EG_transcript_10443	N	Y
RCo004453	K08766	Fatty acid metabolism	Lipid metabolism	Carnitine O-palmitoyltransferase 2	PRP84915.1 choline/carnitine O-acetyltransferase	1.4e-144	Planoprotostelium fungivorum	Q7SAN8 Putative uncharacterized protein N. crassa OR74A 0 1Q7SAN8	1e-89	Q7SAN8_NEUCR	N	N	-	-	Y	EG_transcript_3467	N	Y
RCo031732	K00626	Fatty acid metabolism	Lipid metabolism	Acetyl-CoA acyltransferase 2	OLS15498.1 protein AtoB1	8.7e-152	Candidatus Lokiarchaeota archaeon CR_4	Pygsuia biforma_HADB homologue	4e-89	Pyg_HADB	Y	N	-	-	Y	EG_transcript_10443	N	Y
RCo016459	K00059	Fatty acid metabolism	Lipid metabolism	3-oxoacyl-[acyl-carrier protein] reductase	MSQ08487.1 SDR family oxidoreductase	8.4e-39	Dehalococcoidia bacterium	Q99LB2 Dehydrogenase/reductase SDR family member 4 M. musculus 0 22Q99LB2	3e-25	DHRS4_MOUSE	Y	N	0.744	0.858	Y	EG_transcript_13468	Y	Y
RCo035493	K00059	Fatty acid metabolism	Lipid metabolism	3-oxoacyl-[acyl-carrier protein] reductase	WP_059601953.1 SDR family oxidoreductase	2.1e-40	Burkholderia pseudomultivorans	-	-	-	Y	N	0.684	-	Y	EG_transcript_13468	N	Y
RCo033121	K08765	Fatty acid metabolism	Lipid metabolism	Carnitine O-palmitoyltransferase 1	XP_028669421.1 carnitine O-palmitoyltransferase 1, liver isoform-like isoform X1	6.4e-53	Erpetoichthys calabaricus	-	-	-	N	N	-	-	Y	EG_transcript_1929	N	Y
RCo011994	K00626	Fatty acid metabolism	Lipid metabolism	Acetyl-CoA acyltransferase 2	OLS15498.1 protein AtoB1	2.4e-139	Candidatus Lokiarchaeota archaeon CR_4	-	-	-	Y	N	-	-	Y	EG_transcript_10443	N	Y
RCo024188	K00626	Fatty acid metabolism	Lipid metabolism	Acetyl-CoA acyltransferase 2	OLS15498.1 protein AtoB1	3.1e-154	Candidatus Lokiarchaeota archaeon CR_4	-	-	-	Y	N	-	-	Y	EG_transcript_10443	N	Y
RCo047128	K01897	Fatty acid metabolism	Lipid metabolism	Long-chain acyl-CoA synthetase	EWM20588.1 long-chain acyl- synthetase 7	2.3e-165	Nannochloropsis gaditana	-	-	-	Y	N	-	-	Y	EG_transcript_2914	N	Y
RCo002600	-	Glycerolipid metabolism	Lipid metabolism	Aldo/keto reductase	OLP80547.1 hypothetical protein AK812_SmicGene39030	8e-89	Symbiodinium microadriaticum	Q9JII6 Alcohol dehydrogenase [NADP(+)] M. musculus 0 3Q9JII6	2e-52	AK1A1_MOUSE	Y	N	-	-	Y	EG_transcript_17460	N	Y
RCo000138	K18693	Glycerolipid metabolism	Lipid metabolism	Diacylglycerol diphosphate phosphatase / phosphatidate phosphatase	RKP24680.1 phosphatidic acid phosphatase type 2/haloperoxidase, partial	3.4e-20	Syncephalis pseudoplumigaleata	-	-	-	Y	N	-	-	Y	EG_transcript_19279	N	Y
RCo046343	K18693	Glycerolipid metabolism	Lipid metabolism	Diacylglycerol diphosphate phosphatase / phosphatidate phosphatase	KAE9411533.1 PAP2-domain-containing protein	1.7e-24	Gymnopus androsaceus JB14	-	-	-	Y	N	-	-	Y	EG_transcript_19279	N	Y
RCo013621	K18693	Glycerolipid metabolism	Lipid metabolism	Diacylglycerol diphosphate phosphatase / phosphatidate phosphatase	KNZ75493.1 putative diacylglycerol pyrophosphate phosphatase 1	2.3e-28	Termitomyces sp. J132	-	-	-	Y	N	-	-	Y	EG_transcript_19279	N	Y
RCo005749	K00011	Glycerolipid metabolism	Lipid metabolism	Aldehyde reductase	PTQ42733.1 hypothetical protein MARPO_0028s0051	6.2e-58	Marchantia polymorpha	-	-	-	N	N	-	-	Y	EG_transcript_17460	N	Y
RCo031737	K00011	Glycerolipid metabolism	Lipid metabolism	Aldehyde reductase	XP_004991399.1 aldo/keto reductase	2.3e-78	Salpingoeca rosetta	-	-	-	Y	N	-	-	Y	EG_transcript_17460	N	Y
RCo005834	K00011	Glycerolipid metabolism	Lipid metabolism	Aldehyde reductase	WP_071895962.1 aldo/keto reductase	1.8e-82	Cystobacter ferrugineus	-	-	-	Y	N	0.929	-	Y	EG_transcript_17460	N	Y
RCo044208	K00981	Glycerophospholipid metabolism	Lipid metabolism	Phosphatidate cytidylyltransferase, mitochondrial	XP_007436553.1 phosphatidate cytidylyltransferase, mitochondrial	3.7e-41	Python bivittatus	Q3TUH1 Mitochondrial translocator assembly and maintenance protein 41 homolog M. musculus 0 11Q3TUH1	5e-51	TAM41_MOUSE	Y	N	0.389	0.523	Y	EG_transcript_14985	Y	Y
RCo005441	K00111	Glycerophospholipid metabolism	Lipid metabolism	Glycerol-3-phosphate dehydrogenase	XP_010969625.1 PREDICTED: glycerol-3-phosphate dehydrogenase, mitochondrial isoform X1	1.2e-18	Camelus bactrianus	A2AQR0 Glycerol-3-phosphate dehydrogenase, mitochondrial M. musculus 0 24A2AQR0	4e-23	A2AQR0_MOUSE	N	N	-	-	Y	EG_transcript_20488	N	Y
RCo045201	K08744	Glycerophospholipid metabolism	Lipid metabolism	Cardiolipin synthase (CMP-forming)	CBJ31328.1 CDP-alcohol phosphatidyltransferase	3.3e-22	Ectocarpus siliculosus	Pygsuia biforma cardiolipin synthase homologue	2e-17	Pyg_CLS	N	N	-	-	N	-	N	N
RCo042436	K00995	Glycerophospholipid metabolism	Lipid metabolism	CDP-diacylglycerol---glycerol-3-phosphate 3-phosphatidyltransferase	XP_004352542.1 CDPdiacylglycerol--glycerol-3-phosphate 3-phosphatidyltransferase, mitochondrial, putative	1.9e-55	Acanthamoeba castellanii str. Neff	Pygsuia biforma PGPS homologue	5e-15	Pyg_PGPS	N	N	-	-	Y	EG_transcript_10476	N	Y
RCo022462	K05929	Glycerophospholipid metabolism	Lipid metabolism	SAM-dependent methyltransferase	OPY70413.1 Demethylrebeccamycin-D-glucose O-methyltransferase	8e-45	Syntrophorhabdaceae bacterium PtaU1.Bin034	P27680 Hexaprenyldihydroxybenzoate methyltransferase, mitochondrial S. cerevisiae S288c 3 2P27680	6e-07	COQ3_YEAST	Y	N	0.771	-	N	-	Y	N
RCo008323	K01613	Glycerophospholipid metabolism	Lipid metabolism	Phosphatidylserine decarboxylase	CUG94097.1 phosphatidylserine decarboxylase, putative	2.7e-54	Bodo saltans	Q8BSF4 Phosphatidylserine decarboxylase proenzyme M. musculus 0 12Q8BSF4	1e-06	PISD_MOUSE	Y	N	-	-	N	-	N	N
RCo045202	K08744	Glycerophospholipid metabolism	Lipid metabolism	Cardiolipin synthase (CMP-forming)	CBJ31328.1 CDP-alcohol phosphatidyltransferase	3.4e-22	Ectocarpus siliculosus	-	-	-	Y	N	0.798	0.985	Y	EG_transcript_19157	N	Y
RCo036146	K06130	Glycerophospholipid metabolism	Lipid metabolism	Lysophospholipase II	ORZ33929.1 Phospholipase/carboxylesterase/thioesterase, partial	5.5e-39	Catenaria anguillulae PL171	-	-	-	N	N	-	-	Y	EG_transcript_18914	N	Y
RCo045307	K06130	Glycerophospholipid metabolism	Lipid metabolism	Lysophospholipase II	XP_023578257.1 acyl-protein thioesterase 2 isoform X1	6.2e-48	Octodon degus	-	-	-	N	N	-	-	Y	EG_transcript_18914	N	Y
RCo030917	K00111	Glycerophospholipid metabolism	Lipid metabolism	Glycerol-3-phosphate dehydrogenase	CCX04811.1 Similar to Glycerol-3-phosphate dehydrogenase, mitochondrial; acc. no. A6QLU1	3.9e-103	Pyronema omphalodes CBS 100304	-	-	-	N	N	0.609	-	Y	EG_transcript_20488	N	Y
RCo003440	K01115	Membrane trafficking	Lipid metabolism	Phospholipase D1/2	PKI74861.1 hypothetical protein CRG98_004633	3.2e-84	Punica granatum	-	-	-	N	N	-	-	Y	EG_transcript_1809	N	Y
RCo003437	K01115	Membrane trafficking	Lipid metabolism	Phospholipase D1/2	AYA70427.1 putative phospholipase D	1.2e-137	Coccomyxa subellipsoidea	-	-	-	Y	N	-	-	Y	EG_transcript_1809	N	Y
RCo024036	K01115	Membrane trafficking	Lipid metabolism	Phospholipase D1/2	AYA70427.1 putative phospholipase D	6.2e-150	Coccomyxa subellipsoidea	-	-	-	Y	N	-	-	Y	EG_transcript_1809	N	Y
RCo022888	K08764	Primary bile acid biosynthesis	Lipid metabolism	Sterol carrier protein 2	XP_029561686.1 non-specific lipid-transfer protein	8e-26	Salmo trutta	A2APS4 Non-specific lipid-transfer protein M. musculus 0 18A2APS4	3e-36	A2APS4_MOUSE	N	N	0.77	-	N	-	Y	N
RCo005515	K11992	Primary bile acid biosynthesis	Lipid metabolism	Acyl-coenzyme A thioesterase 8	WP_087463490.1 acyl-CoA thioesterase II	5.4e-44	Oleiphilus messinensis	P41903 Peroxisomal acyl-coenzyme A thioester hydrolase 1 S. cerevisiae S288c 1 4P41903	2e-14	PTE1_YEAST	Y	Y	0.544	-	N	-	Y	N
RCo021675	K00654	Sphingolipid metabolism	Lipid metabolism	Serine palmitoyltransferase	VAI07666.1 unnamed protein product	9.8e-34	Triticum turgidum subsp. durum	| organism=Trichomonas_vaginalis_G3 | product=2-amino-3-ketobutyrate coenzyme A ligase, putative | location=DS113181:279542-280957(-) | length=472	2e-30	TVAG_076510	N	N	0.741	-	N	-	Y	N
RCo014076	K04718	Sphingolipid metabolism	Lipid metabolism	Sphingosine kinase	CEO95804.1 hypothetical protein PBRA_004517	6.3e-36	Plasmodiophora brassicae	Q53H12 Acylglycerol kinase, mitochondrial H. sapiens 0 2Q53H12	1e-10	AGK_HUMAN	N	N	-	-	Y	EG_transcript_8731	N	Y
RCo023036	K04718	Sphingolipid metabolism	Lipid metabolism	Sphingosine kinase	PSR80508.1 sphingosine kinase	3.4e-22	Coniella lustricola	-	-	-	N	N	-	-	Y	EG_transcript_8731	N	Y
RCo038924	K01634	Sphingolipid metabolism	Lipid metabolism	Sphinganine-1-phosphate aldolase	XP_012565292.1 PREDICTED: sphingosine-1-phosphate lyase 1-like	7.4e-127	Hydra vulgaris	-	-	-	Y	N	-	-	Y	EG_transcript_6941	N	Y
RCo026602	K07748	Steroid biosynthesis	Lipid metabolism	Sterol-4alpha-carboxylate 3-dehydrogenase (decarboxylating)	XP_020607584.1 3 beta-hydroxysteroid dehydrogenase/Delta 5-->4-isomerase type 3-like	3.2e-44	Orbicella faveolata	Q61694 3 beta-hydroxysteroid dehydrogenase type 5 M. musculus 0 11Q61694	3e-39	3BHS5_MOUSE	Y	N	0.565	-	Y	EG_transcript_15039	Y	Y
RCo050744	K05917	Steroid biosynthesis	Lipid metabolism	Lanosterol 14-alpha-demethylase	XP_029230870.1 putative lanosterol 14-alpha-demethylase	3.7e-94	Trypanosoma conorhini	Q9QZ82 Cholesterol side-chain cleavage enzyme, mitochondrial M. musculus 0 5Q9QZ82	2e-18	CP11A_MOUSE	N	N	0.679	-	N	-	Y	N
RCo026603	K07748	Steroid biosynthesis	Lipid metabolism	Sterol-4alpha-carboxylate 3-dehydrogenase (decarboxylating)	XP_020607584.1 3 beta-hydroxysteroid dehydrogenase/Delta 5-->4-isomerase type 3-like	1.8e-47	Orbicella faveolata	-	-	-	Y	N	0.59	-	Y	EG_transcript_15039	N	Y
RCo021445	K00559	Steroid biosynthesis	Lipid metabolism	Sterol 24-C-methyltransferase	PDM67955.1 methyltransferase	4.4e-72	Pristionchus pacificus	-	-	-	Y	N	0.802	-	Y	EG_transcript_10488	N	Y
RCo046837	K00559	Steroid biosynthesis	Lipid metabolism	Sterol 24-C-methyltransferase	XP_012754154.1 hypothetical protein SAMD00019534_061020	2e-91	Acytostelium subglobosum LB1	-	-	-	Y	N	-	-	Y	EG_transcript_10488	N	Y
RCo011953	K07748	Steroid biosynthesis	Lipid metabolism	Sterol-4alpha-carboxylate 3-dehydrogenase (decarboxylating)	CBJ29465.1 Sterol-4-alpha-carboxylate 3-dehydrogenase, decarboxylating	5.9e-111	Ectocarpus siliculosus	-	-	-	N	N	-	-	Y	EG_transcript_15039	N	Y
RCo005971	K01015	Steroid hormone biosynthesis	Lipid metabolism	Alcohol sulfotransferase	XP_020625840.1 sulfotransferase 1C2A-like isoform X2	8.5e-40	Orbicella faveolata	-	-	-	N	N	0.932	0.995	Y	EG_transcript_20977	N	Y
RCo030122	K08869	ABC transporters	Membrane transport	ABC transporter, mitochondrial	XP_020114204.1 protein ABC transporter 1, mitochondrial isoform X1	1.8e-42	Ananas comosus	Q5BJQ0 Chaperone activity of bc1 complex-like, mitochondrial R. norvegicus 0 1Q5BJQ0	6e-48	ADCK3_RAT	N	N	-	-	Y	EG_transcript_6595	N	Y
RCo000044	K08712	ABC transporters	Membrane transport	ABC-transporter; subfamily G (WHITE), member 2, SNQ2	GAY05304.1 pleiotropic drug resistance protein ABC superfamily	7.1e-54	Pythium insidiosum	P32568 Protein SNQ2 S. cerevisiae S288c 0 3P32568	7e-43	SNQ2_YEAST	N	N	0.558	-	N	-	Y	N
RCo001498	K08712	ABC transporters	Membrane transport	ABC-transporter; subfamily G (WHITE), member 2, SNQ2	XP_009531885.1 hypothetical protein PHYSODRAFT_250528	2.5e-61	Phytophthora sojae	Q04182 ATP-dependent permease PDR15 S. cerevisiae S288c 0 1Q04182	1e-39	PDR15_YEAST	N	N	0.55	-	N	-	Y	N
RCo006508	K05676	ABC transporters	Membrane transport	ABC-transporter; subfamily D (ALD), member 2	XP_629252.1 ABC transporter D family protein	7.4e-28	Dictyostelium discoideum AX4	E7EUE1 ATP-binding cassette sub-family D member 3 H. sapiens 1 1E7EUE1	4e-35	E7EUE1_HUMAN	N	N	-	-	Y	EG_transcript_2824	N	Y
RCo001499	K08712	ABC transporters	Membrane transport	ABC-transporter; subfamily G (WHITE), member 2, SNQ2	RAW29537.1 ABC transporter G family member 29	3.5e-39	Phytophthora cactorum	P53756 ABC transporter ATP-binding protein/permease PDR18 S. cerevisiae S288c 0 2P53756	2e-31	PDR18_YEAST	N	N	0.579	-	N	-	Y	N
RCo022295	K01990	ABC transporters	Membrane transport	ABC-2 type transport system ATP-binding protein	PXF23453.1 ABC transporter ATP-binding protein	2.5e-38	Euryarchaeota archaeon	H0Y4U7 ATP-binding cassette sub-family A member 9 H. sapiens 1 0H0Y4U7	2e-21	H0Y4U7_HUMAN	N	N	0.84	0.398	N	-	Y	N
RCo008704	K05663	ABC transporters	Membrane transport	ABC-transporter; subfamily B, mitochondrial transporter ATM (ISC export system)	XP_021957801.1 ATP-binding cassette sub-family B member 7, mitochondrial-like	0.00012	Folsomia candida	P40416 Iron-sulfur clusters transporter ATM1, mitochondrial S. cerevisiae S288c 2 3P40416	1e-08	ATM1_YEAST	Y	N	0.911	-	N	-	Y	N
RCo044548	K05681	ABC transporters	Membrane transport	ABC-transporter; subfamily G (WHITE), member 2	GAQ88401.1 ABC transporter G family	1.2e-16	Klebsormidium nitens	-	-	-	N	N	-	-	Y	EG_transcript_1168	N	Y
RCo032104	K05658	ABC transporters	Membrane transport	ABC-transporter; subfamily B (MDR/TAP), member 1	OUM56955.1 hypothetical protein PIROE2DRAFT_49127	2.6e-32	Piromyces sp. E2	-	-	-	N	N	-	-	Y	EG_transcript_2104	N	Y
RCo037965	K05663	ABC transporters	Membrane transport	ABC-transporter; subfamily B, mitochondrial transporter ATM (ISC export system)	PRW21021.1 ABC transporter B family member mitochondrial	3e-46	Chlorella sorokiniana	-	-	-	N	N	-	-	N	-	N	N
RCo039297	K05658	ABC transporters	Membrane transport	ABC-transporter; subfamily B (MDR/TAP), member 1	XP_013089926.1 PREDICTED: LOW QUALITY PROTEIN: multidrug resistance protein 1-like, partial	2.2e-54	Biomphalaria glabrata	-	-	-	Y	N	-	-	Y	EG_transcript_2104	N	Y
RCo014708	K05658	ABC transporters	Membrane transport	ABC-transporter; subfamily B (MDR/TAP), member 1	ORY57659.1 multidrug resistance protein 1	7.3e-55	Neocallimastix californiae	-	-	-	Y	N	-	-	Y	EG_transcript_2104	N	Y
RCo011911	K05658	ABC transporters	Membrane transport	ABC-transporter; subfamily B (MDR/TAP), member 1	OUM64641.1 hypothetical protein PIROE2DRAFT_53955	9.2e-57	Piromyces sp. E2	-	-	-	N	N	-	-	Y	EG_transcript_1803	N	Y
RCo016041	K08712	ABC transporters	Membrane transport	ABC-transporter; subfamily G (WHITE), member 2	XP_024582233.1 atp-binding cassette superfamily	5.4e-57	Plasmopara halstedii	-	-	-	Y	N	-	-	Y	EG_transcript_419	N	Y
RCo040750	K05676	ABC transporters	Membrane transport	ABC-transporter; subfamily D (ALD), member 2	TMS37655.1 hypothetical protein L596_004543	5.2e-74	Steinernema carpocapsae	-	-	-	N	N	-	-	Y	EG_transcript_2824	N	Y
RCo003108	K05658	ABC transporters	Membrane transport	ABC-transporter; subfamily B (MDR/TAP), member 1	XP_009307399.1 putative p-glycoprotein	1.5e-90	Trypanosoma grayi	-	-	-	N	N	-	-	Y	EG_transcript_634	N	Y
RCo052409	K05643	ABC transporters	Membrane transport	ABC-transporter; subfamily A (ABC1); member 3	KAF0980095.1 hypothetical protein FDP41_000873	2.9e-101	Naegleria fowleri	-	-	-	N	N	-	-	Y	EG_transcript_251	N	Y
RCo016036	K08712	ABC transporters	Membrane transport	ABC-transporter; subfamily G (WHITE), member 2	OQR89888.1 ATP-binding Cassette (ABC) Superfamily	3.1e-102	Thraustotheca clavata	-	-	-	N	N	0.807	-	Y	EG_transcript_419	N	Y
RCo028031	K05643	ABC transporters	Membrane transport	ABC-transporter; subfamily A (ABC1); member 3	PRP75783.1 ATP-binding cassette transporter subfamily A-like	1.4e-110	Planoprotostelium fungivorum	-	-	-	Y	N	-	-	Y	EG_transcript_251	N	Y
RCo015186	K05663	ABC transporters	Membrane transport	ABC-transporter; subfamily B, mitochondrial transporter ATM (ISC export system)	XP_029232347.1 putative ATP-binding cassette protein subfamily B, member 3	1.8e-111	Trypanosoma conorhini	-	-	-	Y	N	0.666	-	Y	EG_transcript_3260	N	Y
RCo052364	K05658	ABC transporters	Membrane transport	ABC-transporter; subfamily B (MDR/TAP), member 1	XP_022796454.1 multidrug resistance protein 1-like	1.2e-117	Stylophora pistillata	-	-	-	Y	N	-	-	Y	EG_transcript_634	N	Y
RCo024043	K05665	ABC transporters	Membrane transport	ABC-transporter; multidrug resistance protein; ATP-binding cassette subfamily C (CFTR/MRP) member 9	CUI15195.1 ABC transporter, putative, partial	2.4e-120	Bodo saltans	-	-	-	Y	N	-	-	Y	EG_transcript_254	N	Y
RCo025105	K05676	ABC transporters	Membrane transport	ABC-transporter; subfamily D (ALD), member 2	XP_020432747.1 ABC transporter D family protein	1.5e-121	Heterostelium album PN500	-	-	-	N	N	-	-	Y	EG_transcript_2824	N	Y
RCo014917	K05676	ABC transporters	Membrane transport	ABC-transporter; subfamily D (ALD), member 2	GAQ89491.1 ABC Acyl Transporter	2e-125	Klebsormidium nitens	-	-	-	N	N	-	-	Y	EG_transcript_2824	N	Y
RCo025078	K05667	ABC transporters	Membrane transport	ABC-transporter; subfamily C (CFTR/MRP), member 3	TMW62290.1 hypothetical protein Poli38472_009783	2.7e-140	Pythium oligandrum	-	-	-	N	N	-	-	Y	EG_transcript_254	N	Y
RCo016037	-	ABC transporters	Membrane transport	ABC-transporter; subfamily G (WHITE), member 2	TMW67517.1 hypothetical protein Poli38472_011137	2e-140	Pythium oligandrum	-	-	-	Y	N	-	0.506	Y	EG_transcript_419	N	Y
RCo050831	K06184	ABC transporters	Membrane transport	ABC-transporter; subfamily F, member 1	GET91772.1 ATP-binding cassette protein, putative	2.2e-167	Leishmania tarentolae	-	-	-	N	N	-	-	Y	EG_transcript_1139	N	Y
RCo027113	K05656	ABC transporters	Membrane transport	ABC-transporter; subfamily B (MDR/TAP), member 9	CEL94100.1 unnamed protein product	1.7e-167	Vitrella brassicaformis CCMP3155	-	-	-	N	N	-	-	Y	EG_transcript_6572	N	Y
RCo020205	K05663	ABC transporters	Membrane transport	ABC-transporter; subfamily B, mitochondrial transporter ATM (ISC export system)	CBN74933.1 hypothetical protein Esi_0060_0030	1.8e-177	Ectocarpus siliculosus	-	-	-	N	N	0.872	0.799	Y	EG_transcript_3260	N	Y
RCo021938	K05658	ABC transporters	Membrane transport	ABC-transporter; subfamily B (MDR/TAP), member 1	PSC72762.1 ATP binding cassette subfamily B4 isoform 2	1.8e-185	Micractinium conductrix	-	-	-	N	N	-	-	Y	EG_transcript_634	N	Y
RCo018004	K05665	ABC transporters	Membrane transport	ABC-transporter; multidrug resistance protein; ATP-binding cassette subfamily C (CFTR/MRP) member 9	CUI15196.1 ABC transporter, putative, partial	5.4e-210	Bodo saltans	-	-	-	N	N	-	-	Y	EG_transcript_254	N	Y
RCo053802	K05658	ABC transporters	Membrane transport	ABC-transporter; subfamily B (MDR/TAP), member 1	XP_004365053.2 multidrug resistance protein 1a	3.6e-245	Capsaspora owczarzaki ATCC 30864	-	-	-	Y	N	0.563	-	Y	EG_transcript_634	N	Y
RCo018008	K05665	ABC transporters	Membrane transport	ABC-transporter; multidrug resistance protein; ATP-binding cassette subfamily C (CFTR/MRP) member 9	CUG06517.1 ABC transporter, putative, partial	0	Bodo saltans	-	-	-	Y	N	-	-	Y	EG_transcript_254	N	Y
RCo027187	K01012	Biotin metabolism	Metabolism of cofactors and vitamins	Biotin synthase	PXF46319.1 Biotin synthase	9.2e-57	Gracilariopsis chorda	O59778 Biotin synthase S. pombe 972h- 1 0O59778	4e-56	BIOB_SCHPO	N	N	-	-	N	-	N	N
RCo047626	K01935	Biotin metabolism	Metabolism of cofactors and vitamins	Dethiobiotin synthetase	WP_106137330.1 dethiobiotin synthase	4.3e-25	Spirosoma oryzae	-	-	-	Y	N	0.734	0.446	Y	EG_transcript_38077	N	Y
RCo038793	K00833	Biotin metabolism	Metabolism of cofactors and vitamins	Adenosylmethionine--8-amino-7-oxononanoate aminotransferase	WP_125029874.1 MULTISPECIES: adenosylmethionine--8-amino-7-oxononanoate transaminase	2.8e-95	unclassified Ancylomarina	-	-	-	Y	N	0.882	0.844	N	-	N	N
RCo030586	K00798	Cobalamin biosynthesis	Metabolism of cofactors and vitamins	Cob(I)alamin adenosyltransferase	XP_020392004.1 cob(I)yrinic acid a,c-diamide adenosyltransferase, mitochondrial isoform X1	6.4e-38	Rhincodon typus	Q96EY8 Cob(I)yrinic acid a,c-diamide adenosyltransferase, mitochondrial H. sapiens 1 1Q96EY8	6e-46	MMAB_HUMAN	N	N	-	-	Y	EG_transcript_16043	N	Y
RCo031118	K00798	Cobalamin biosynthesis	Metabolism of cofactors and vitamins	Cob(I)alamin adenosyltransferase	CUI15238.1 cobalamin adenosyltransferase, putative	3.4e-49	Bodo saltans	Q9D273 Cob(I)yrinic acid a,c-diamide adenosyltransferase, mitochondrial M. musculus 0 14Q9D273	1e-45	MMAB_MOUSE	Y	N	-	-	Y	EG_transcript_16043	N	Y
RCo018437	K11754	Folate biosynthesis	Metabolism of cofactors and vitamins	Dihydrofolate synthase / folylpolyglutamate synthase	WP_039383427.1 hypothetical protein	5.1e-39	Neochlamydia sp. TUME1	Q05932 Folylpolyglutamate synthase, mitochondrial H. sapiens 1 1Q05932	9e-34	FOLC_HUMAN	N	N	0.543	-	Y	EG_transcript_13840	Y	Y
RCo004096	K01724	Folate biosynthesis	Metabolism of cofactors and vitamins	4a-hydroxytetrahydrobiopterin dehydratase	WP_045581493.1 4a-hydroxytetrahydrobiopterin dehydratase	5e-34	Azospirillum thiophilum	Q9CZL5 Pterin-4-alpha-carbinolamine dehydratase 2 M. musculus 0 14Q9CZL5	7e-27	PHS2_MOUSE	N	N	-	-	Y	EG_transcript_30862	N	Y
RCo040588	K11754	Folate biosynthesis	Metabolism of cofactors and vitamins	Dihydrofolate synthase / folylpolyglutamate synthase	OUM99404.1 hypothetical protein BAA04_11440	2.7e-27	Firmicutes bacterium ZCTH02-B6	Q9UTD0 Probable folylpolyglutamate synthase S. pombe 972h- 1 0Q9UTD0	3e-24	FOLD_SCHPO	N	N	0.588	-	Y	EG_transcript_13840	Y	Y
RCo010987	K00357	Folate biosynthesis	Metabolism of cofactors and vitamins	Dihydropteridine reductase	XP_021882741.1 hypothetical protein BCR41DRAFT_334636	3.6e-13	Lobosporangium transversale	P09417 Dihydropteridine reductase H. sapiens 0 1P09417	3e-19	DHPR_HUMAN	Y	N	-	-	Y	EG_transcript_33180	N	Y
RCo028516	K00796	Folate biosynthesis	Metabolism of cofactors and vitamins	Dihydropteroate synthase	OAI42590.1 dihydropteroate synthase	1e-20	Rhizomicrobium sp. SCGC AG-212-E05	F5HHZ0 Putative uncharacterized protein N. crassa OR74A 0 1F5HHZ0	9e-14	F5HHZ0_NEUCR	N	N	-	-	Y	EG_transcript_21415	N	Y
RCo012102	K00079	Folate biosynthesis	Metabolism of cofactors and vitamins	Carbonyl reductase 1	CEL99458.1 unnamed protein product	5.1e-21	Vitrella brassicaformis CCMP3155	-	-	-	Y	N	-	-	Y	EG_transcript_25664	N	Y
RCo009798	K00079	Folate biosynthesis	Metabolism of cofactors and vitamins	Carbonyl reductase 1	KNH04785.1 nadph-dependent carbonyl reductase family protein	8.5e-25	Perkinsela sp. CCAP 1560/4	-	-	-	N	N	-	-	Y	EG_transcript_25664	N	Y
RCo007440	K01307	Folate biosynthesis	Metabolism of cofactors and vitamins	Gamma-glutamyl hydrolase	XP_003391262.2 PREDICTED: gamma-glutamyl hydrolase A-like, partial	3.8e-25	Amphimedon queenslandica	-	-	-	N	N	-	-	Y	EG_transcript_17384	N	Y
RCo006037	K01724	Folate biosynthesis	Metabolism of cofactors and vitamins	4a-hydroxytetrahydrobiopterin dehydratase	WP_054206318.1 MULTISPECIES: 4a-hydroxytetrahydrobiopterin dehydratase	5e-27	Pseudoalteromonas	-	-	-	Y	Y	-	-	Y	EG_transcript_30862	N	Y
RCo036318	K00357	Folate biosynthesis	Metabolism of cofactors and vitamins	Dihydropteridine reductase	VVC32108.1 Short-chain dehydrogenase/reductase SDR,NAD(P)-binding domain	1e-27	Cinara cedri	-	-	-	N	N	0.622	-	Y	EG_transcript_33180	N	Y
RCo050386	K01307	Folate biosynthesis	Metabolism of cofactors and vitamins	Gamma-glutamyl hydrolase	XP_003287039.1 hypothetical protein DICPUDRAFT_31892	2e-45	Dictyostelium purpureum	-	-	-	Y	N	-	-	Y	EG_transcript_17384	N	Y
RCo054404	K01307	Folate biosynthesis	Metabolism of cofactors and vitamins	Gamma-glutamyl hydrolase	XP_012676893.2 gamma-glutamyl hydrolase-like	1.7e-52	Clupea harengus	-	-	-	Y	N	-	-	Y	EG_transcript_17384	N	Y
RCo042619	K00079	Folate biosynthesis	Metabolism of cofactors and vitamins	Carbonyl reductase 1	WP_125484240.1 SDR family oxidoreductase	7.5e-82	Edaphobacter aggregans	-	-	-	Y	Y	-	-	Y	EG_transcript_25664	N	Y
RCo014308	K00079	Folate biosynthesis	Metabolism of cofactors and vitamins	Carbonyl reductase 1	WP_125484240.1 SDR family oxidoreductase	6.2e-84	Edaphobacter aggregans	-	-	-	Y	Y	-	-	Y	EG_transcript_25664	N	Y
RCo050850	K03644	Lipoic acid metabolism	Metabolism of cofactors and vitamins	Lipoyl synthase	XP_013174958.1 PREDICTED: lipoyl synthase, mitochondrial	2.8e-104	Papilio xuthus	Q99M04 Lipoyl synthase, mitochondrial M. musculus 0 8Q99M04	2e-124	LIAS_MOUSE	Y	N	0.594	0.942	Y	EG_transcript_8825	Y	Y
RCo050851	K03644	Lipoic acid metabolism	Metabolism of cofactors and vitamins	Lipoyl synthase	XP_014234875.1 lipoyl synthase, mitochondrial	2.2e-75	Trichogramma pretiosum	P32875 Lipoyl synthase, mitochondrial S. cerevisiae S288c 3 2P32875	1e-86	LIPA_YEAST	Y	N	-	-	Y	EG_transcript_8825	N	Y
RCo025298	K00858	Nicotinate and nicotinamide metabolism	Metabolism of cofactors and vitamins	NAD+ kinase	KAA6418110.1 poly(p) ATP NAD	1.3e-81	Trebouxia sp. A1-2	Q9UT98 NADH kinase pos5, mitochondrial S. pombe 972h- 1 0Q9UT98	4e-45	POS5_SCHPO	N	N	0.91	-	Y	EG_transcript_13614	Y	Y
RCo023584	K00858	Nicotinate and nicotinamide metabolism	Metabolism of cofactors and vitamins	NAD+ kinase	GBF91617.1 NAD kinase chloroplastic	1.1e-32	Raphidocelis subcapitata	Q06892 NADH kinase POS5, mitochondrial S. cerevisiae S288c 2 2Q06892	5e-20	POS5_YEAST	N	N	0.698	-	Y	EG_transcript_13614	Y	Y
RCo019084	K11417	Nicotinate and nicotinamide metabolism	Metabolism of cofactors and vitamins	NAD-dependent deacetylase sirtuin 7	RKU46367.1 hypothetical protein DL546_003134	3.3e-30	Coniochaeta pulveracea	Q8K2C6 NAD-dependent protein deacylase sirtuin-5, mitochondrial M. musculus 0 12Q8K2C6	0.0005	SIR5_MOUSE	N	N	0.763	-	N	-	Y	N
RCo050451	K00858	Nicotinate and nicotinamide metabolism	Metabolism of cofactors and vitamins	NAD+ kinase	TMW55840.1 hypothetical protein Poli38472_008488	7.1e-70	Pythium oligandrum	-	-	-	N	N	0.757	-	Y	EG_transcript_13614	N	Y
RCo043962	K00323	Nicotinate and nicotinamide metabolism	Metabolism of cofactors and vitamins	NAD(P) transhydrogenase, mitochondrial	XP_022806552.1 NAD(P) transhydrogenase, mitochondrial-like	5.1e-278	Stylophora pistillata	-	-	-	Y	N	0.972	0.917	Y	EG_transcript_6238	N	Y
RCo051363	K00323	Nicotinate and nicotinamide metabolism	Metabolism of cofactors and vitamins	NAD(P) transhydrogenase, mitochondrial	XP_022806552.1 NAD(P) transhydrogenase, mitochondrial-like	7.3e-296	Stylophora pistillata	-	-	-	Y	N	-	-	Y	EG_transcript_6238	N	Y
RCo048214	K00606	Pantothenate and CoA biosynthesis	Metabolism of cofactors and vitamins	3-methyl-2-oxobutanoate hydroxymethyltransferase	WP_014066557.1 3-methyl-2-oxobutanoate hydroxymethyltransferase	2.6e-100	Rhodothermus marinus	Q09672 Probable 3-methyl-2-oxobutanoate hydroxymethyltransferase S. pombe 972h- 1 0Q09672	1e-59	PANB_SCHPO	Y	N	0.891	0.861	Y	EG_transcript_14237	Y	Y
RCo004885	K02201	Pantothenate and CoA biosynthesis	Metabolism of cofactors and vitamins	Phosphopantetheine adenylyltransferase	XP_011780859.1 hypothetical protein, conserved	6.4e-24	Trypanosoma brucei gambiense DAL972	P53332 Phosphopantetheine adenylyltransferase S. cerevisiae S288c 1 0P53332	6e-25	COAD_YEAST	Y	N	0.745	0.746	N	-	Y	N
RCo014389	K00077	Pantothenate and CoA biosynthesis	Metabolism of cofactors and vitamins	2-dehydropantoate 2-reductase	RME90061.1 2-dehydropantoate 2-reductase, partial	8.4e-11	Anaerolineae bacterium	-	-	-	N	N	-	-	Y	EG_transcript_16846	N	Y
RCo048463	K00077	Pantothenate and CoA biosynthesis	Metabolism of cofactors and vitamins	2-dehydropantoate 2-reductase	WP_106827057.1 2-dehydropantoate 2-reductase	3.4e-25	Burkholderiales bacterium	-	-	-	Y	Y	-	-	Y	EG_transcript_16846	N	Y
RCo004942	K02318	Pantothenate and CoA biosynthesis	Metabolism of cofactors and vitamins	Phosphopantetheine adenylyltransferase / dephospho-CoA kinase	WP_158065777.1 dephospho-CoA kinase	6.3e-38	Tepidiforma bonchosmolovskayae	-	-	-	Y	N	-	-	Y	EG_transcript_39815	N	Y
RCo014388	K00077	Pantothenate and CoA biosynthesis	Metabolism of cofactors and vitamins	2-dehydropantoate 2-reductase	RLC80032.1 2-dehydropantoate 2-reductase	6.4e-39	Chloroflexi bacterium	-	-	-	N	N	-	-	Y	EG_transcript_16846	N	Y
RCo034634	K00077	Pantothenate and CoA biosynthesis	Metabolism of cofactors and vitamins	2-dehydropantoate 2-reductase	TSA15973.1 2-dehydropantoate 2-reductase	5.9e-40	Betaproteobacteria bacterium	-	-	-	N	N	-	-	Y	EG_transcript_16846	N	Y
RCo053079	K00643	Porphyrin and chlorophyll metabolism	Metabolism of cofactors and vitamins	5-aminolevulinate synthase	AAG61086.1 5-aminolevulinate synthase, partial	2e-157	Euglena gracilis	Q8VC19 5-aminolevulinate synthase, nonspecific, mitochondrial M. musculus 0 7Q8VC19	9e-126	HEM1_MOUSE	Y	N	-	-	Y	EG_transcript_6076	N	Y
RCo012206	K01772	Porphyrin and chlorophyll metabolism	Metabolism of cofactors and vitamins	Protoporphyrin/coproporphyrin ferrochelatase	WP_106932184.1 ferrochelatase	6.1e-57	Adhaeribacter sp. HMF7605	Q544X6 Ferrochelatase M. musculus 0 17Q544X6	4e-10	Q544X6_MOUSE	Y	N	-	-	Y	EG_transcript_13855	N	Y
RCo035204	K01772	Porphyrin and chlorophyll metabolism	Metabolism of cofactors and vitamins	Protoporphyrin/coproporphyrin ferrochelatase	WP_073572627.1 ferrochelatase	1.6e-16	Algoriphagus zhangzhouensis	-	-	-	N	N	0.556	-	Y	EG_transcript_13855	N	Y
RCo029168	K02495	Porphyrin and chlorophyll metabolism	Metabolism of cofactors and vitamins	Coproporphyrinogen III oxidase	WP_149813102.1 coproporphyrinogen III oxidase	4.7e-33	Roseomonas oryzae	-	-	-	N	N	0.701	0.504	N	-	N	N
RCo041012	-	Porphyrin and chlorophyll metabolism	Metabolism of cofactors and vitamins	Coproporphyrinogen III oxidase	CBX29346.1 hypothetical protein N47_J03270	2.7e-80	uncultured Desulfobacterium sp.	-	-	-	N	N	-	-	N	-	N	N
RCo041013	-	Porphyrin and chlorophyll metabolism	Metabolism of cofactors and vitamins	Coproporphyrinogen III oxidase	CBX29346.1 hypothetical protein N47_J03270	2.7e-80	uncultured Desulfobacterium sp.	-	-	-	Y	N	-	-	N	-	N	N
RCo014132	-	Porphyrin and chlorophyll metabolism	Metabolism of cofactors and vitamins	Coproporphyrinogen III oxidase	MAC27607.1 radical SAM protein	1.3e-83	Myxococcales bacterium	-	-	-	Y	N	-	-	Y	EG_transcript_28018	N	Y
RCo026828	K00231	Porphyrin and chlorophyll metabolism	Metabolism of cofactors and vitamins	Protoporphyrinogen/coproporphyrinogen III oxidase	AEA86535.1 protoporphyrinogen oxidase	9.6e-90	Euglena gracilis	-	-	-	Y	N	-	-	Y	EG_transcript_9328	N	Y
RCo045122	-	Porphyrin and chlorophyll metabolism	Metabolism of cofactors and vitamins	Coproporphyrinogen III oxidase	MBH23692.1 radical SAM protein	3.1e-93	Myxococcales bacterium	-	-	-	N	N	0.959	0.966	Y	EG_transcript_28018	N	Y
RCo045123	-	Porphyrin and chlorophyll metabolism	Metabolism of cofactors and vitamins	Coproporphyrinogen III oxidase	MBH23692.1 radical SAM protein	3.1e-93	Myxococcales bacterium	-	-	-	Y	N	-	-	N	-	N	N
RCo019415	-	Porphyrin and chlorophyll metabolism	Metabolism of cofactors and vitamins	Coproporphyrinogen III oxidase	WP_027358381.1 radical SAM protein	8.2e-100	Desulforegula conservatrix	-	-	-	Y	N	0.691	0.781	Y	EG_transcript_22146	N	Y
RCo014717	-	Porphyrin and chlorophyll metabolism	Metabolism of cofactors and vitamins	Coproporphyrinogen III oxidase	OPY88177.1 coproporphyrinogen III oxidase	4.8e-100	Syntrophus sp. PtaU1.Bin208	-	-	-	Y	N	0.855	0.983	N	-	N	N
RCo015271	-	Porphyrin and chlorophyll metabolism	Metabolism of cofactors and vitamins	Coproporphyrinogen III oxidase	RJP80781.1 radical SAM protein	1.4e-116	Desulfobacteraceae bacterium	-	-	-	N	N	-	-	Y	EG_transcript_22146	N	Y
RCo016495	K11153	Retinol metabolism	Metabolism of cofactors and vitamins	Retinol dehydrogenase 12	PSC68474.1 WW domain-containing oxidoreductase	1.3e-65	Micractinium conductrix	Q8NBN7 Retinol dehydrogenase 13 H. sapiens 0 1Q8NBN7	3e-49	RDH13_HUMAN	Y	N	-	-	Y	EG_transcript_14637	N	Y
RCo039947	K09516	Retinol metabolism	Metabolism of cofactors and vitamins	All-trans-retinol 13,14-reductase	QHQ37937.1 FAD-dependent oxidoreductase	4e-115	Microbulbifer hydrolyticus	E9QPD2 Pyridine nucleotide-disulfide oxidoreductase domain-containing protein 2 M. musculus 0 2E9QPD2	1e-06	E9QPD2_MOUSE	Y	N	-	-	Y	EG_transcript_5768	N	Y
RCo013234	K09516	Retinol metabolism	Metabolism of cofactors and vitamins	All-trans-retinol 13,14-reductase	TNF32366.1 NAD(P)/FAD-dependent oxidoreductase	2.5e-24	Deltaproteobacteria bacterium	-	-	-	N	N	-	-	Y	EG_transcript_5768	N	Y
RCo055089	K09516	Retinol metabolism	Metabolism of cofactors and vitamins	All-trans-retinol 13,14-reductase	WP_074904148.1 NAD(P)/FAD-dependent oxidoreductase	1.2e-31	Microbulbifer thermotolerans	-	-	-	N	N	-	-	Y	EG_transcript_5768	N	Y
RCo039946	K09516	Retinol metabolism	Metabolism of cofactors and vitamins	All-trans-retinol 13,14-reductase	QHQ37937.1 FAD-dependent oxidoreductase	2.6e-41	Microbulbifer hydrolyticus	-	-	-	N	N	-	-	Y	EG_transcript_5768	N	Y
RCo041345	K11153	Retinol metabolism	Metabolism of cofactors and vitamins	Retinol dehydrogenase 12	PRW05915.1 retinol dehydrogenase 12-like	2e-50	Chlorella sorokiniana	-	-	-	N	N	-	-	Y	EG_transcript_14637	N	Y
RCo033531	K09516	Retinol metabolism	Metabolism of cofactors and vitamins	All-trans-retinol 13,14-reductase	XP_005821101.1 hypothetical protein GUITHDRAFT_166294	6.9e-51	Guillardia theta CCMP2712	-	-	-	N	N	0.823	-	Y	EG_transcript_5768	N	Y
RCo044699	K11153	Retinol metabolism	Metabolism of cofactors and vitamins	Retinol dehydrogenase 12	PSC68474.1 WW domain-containing oxidoreductase	5.8e-71	Micractinium conductrix	-	-	-	Y	N	-	-	Y	EG_transcript_14637	N	Y
RCo043551	K11153	Retinol metabolism	Metabolism of cofactors and vitamins	Retinol dehydrogenase 12	PSC68474.1 WW domain-containing oxidoreductase	3e-78	Micractinium conductrix	-	-	-	Y	N	-	-	Y	EG_transcript_14637	N	Y
RCo041477	K09516	Retinol metabolism	Metabolism of cofactors and vitamins	All-trans-retinol 13,14-reductase	MBD88963.1 FAD-dependent oxidoreductase	4.2e-80	Deltaproteobacteria bacterium	-	-	-	Y	N	-	-	Y	EG_transcript_5768	N	Y
RCo043299	-	Rhodoquinone biosynthesis	Metabolism of cofactors and vitamins	Rhodoquinone methyltransferase	WP_124736187.1 MULTISPECIES: methyltransferase domain-containing protein	4.6e-46	Proteobacteria	Pygsuia biforma Rhodoquinone methyltransferase homologue	6e-56	Pyg_RquA	Y	N	-	-	N	-	N	N
RCo043305	-	Rhodoquinone biosynthesis	Metabolism of cofactors and vitamins	Rhodoquinone methyltransferase	WP_124736187.1 MULTISPECIES: methyltransferase domain-containing protein	8e-46	Proteobacteria	-	-	-	Y	N	-	-	N	-	N	N
RCo043301	-	Rhodoquinone biosynthesis	Metabolism of cofactors and vitamins	Rhodoquinone methyltransferase	WP_124736187.1 MULTISPECIES: methyltransferase domain-containing protein	7.9e-46	Proteobacteria	-	-	-	Y	N	-	-	N	-	N	N
RCo043302	-	Rhodoquinone biosynthesis	Metabolism of cofactors and vitamins	Rhodoquinone methyltransferase	WP_124736187.1 MULTISPECIES: methyltransferase domain-containing protein	4.7e-46	Proteobacteria	-	-	-	Y	N	-	-	Y	EG_transcript_16311	N	Y
RCo048630	K01078	Thiamine metabolism	Metabolism of cofactors and vitamins	Acid phosphatase	KXS12800.1 phosphoglycerate mutase-like protein	1.3e-09	Gonapodya prolifera JEL478	Q9USS6 Probable acid phosphatase SPBC4.06 S. pombe 972h- 1 0Q9USS6	4e-07	PPA4_SCHPO	N	N	-	-	Y	EG_transcript_8839	N	Y
RCo014309	K05307	Thiamine metabolism	Metabolism of cofactors and vitamins	Thiamine-triphosphatase	XP_030066408.1 thiamine-triphosphatase-like	3.1e-23	Microcaecilia unicolor	-	-	-	Y	N	-	-	Y	EG_transcript_21942	N	Y
RCo045241	K00788	Thiamine metabolism	Metabolism of cofactors and vitamins	Thiamine-phosphate pyrophosphorylase	WP_066788437.1 thiamine phosphate synthase	9.8e-49	Chloroflexus islandicus	-	-	-	Y	Y	-	-	Y	EG_transcript_22875	N	Y
RCo016316	K06127	Ubiquinone and other terpenoid-quinone biosynthesis	Metabolism of cofactors and vitamins	2-methoxy-6-polyprenyl-1,4-benzoquinol methylase (COQ5)	XP_008902680.1 hypothetical protein PPTG_09440	8.5e-80	Phytophthora parasitica INRA-310	Q9LVC8 2-methoxy-6-polyprenyl-1,4-benzoquinol methylase, mitochondrial A. thaliana 0 2Q9LVC8	1e-95	COQ5_ARATH	Y	N	0.963	0.996	Y	EG_transcript_19736	Y	Y
RCo013754	K00591	Ubiquinone and other terpenoid-quinone biosynthesis	Metabolism of cofactors and vitamins	Polyprenyldihydroxybenzoate methyltransferase / 3-demethylubiquinol 3-O-methyltransferase (COQ3)	XP_029206998.1 uncharacterized protein LOC114970399	2e-56	Acropora millepora	Q9NZJ6 Hexaprenyldihydroxybenzoate methyltransferase, mitochondrial H. sapiens 0 3Q9NZJ6	7e-62	COQ3_HUMAN	N	N	-	-	Y	EG_transcript_21906	N	Y
RCo050275	K18586	Ubiquinone and other terpenoid-quinone biosynthesis	Metabolism of cofactors and vitamins	Ubiquinone biosynthesis protein COQ4	KAF0709558.1 hypothetical protein AaE_012837	5.3e-55	Aphanomyces astaci	Q8BGB8 Ubiquinone biosynthesis protein COQ4 homolog, mitochondrial M. musculus 0 12Q8BGB8	7e-57	COQ4_MOUSE	Y	N	-	-	Y	EG_transcript_18811	N	Y
RCo012011	K06127	Ubiquinone and other terpenoid-quinone biosynthesis	Metabolism of cofactors and vitamins	2-methoxy-6-polyprenyl-1,4-benzoquinol methylase (COQ5)	RYD58289.1 bifunctional demethylmenaquinone methyltransferase/2-methoxy-6-polyprenyl-1,4-benzoquinol methylase UbiE	2.8e-36	Sphingobacteriales bacterium	Q5HYK3 2-methoxy-6-polyprenyl-1,4-benzoquinol methylase, mitochondrial H. sapiens 0 4Q5HYK3	1e-43	COQ5_HUMAN	Y	Y	-	-	Y	EG_transcript_19736	N	Y
RCo040520	K03809	Ubiquinone and other terpenoid-quinone biosynthesis	Metabolism of cofactors and vitamins	NAD(P)H quinone oxidoreductase	CEM08867.1 unnamed protein product	7.3e-32	Vitrella brassicaformis CCMP3155	Q7SHF6 Minor allergen Alt a 7 N. crassa OR74A 0 1Q7SHF6	2e-34	Q7SHF6_NEUCR	Y	N	-	-	N	-	N	N
RCo044822	K06126	Ubiquinone and other terpenoid-quinone biosynthesis	Metabolism of cofactors and vitamins	Ubiquinone biosynthesis monooxygenase COQ6	XP_011775067.1 Monooxygenase, putative	3.7e-37	Trypanosoma brucei gambiense DAL972	-	-	-	N	N	-	-	N	-	N	N
RCo044820	K06126	Ubiquinone and other terpenoid-quinone biosynthesis	Metabolism of cofactors and vitamins	Ubiquinone biosynthesis monooxygenase COQ6	GET85987.1 hypothetical protein, conserved	3.7e-37	Leishmania tarentolae	-	-	-	N	N	-	-	N	-	N	N
RCo044821	K06126	Ubiquinone and other terpenoid-quinone biosynthesis	Metabolism of cofactors and vitamins	Ubiquinone biosynthesis monooxygenase COQ6	XP_011775067.1 Monooxygenase, putative	1.7e-37	Trypanosoma brucei gambiense DAL972	-	-	-	N	N	-	-	N	-	N	N
RCo014938	K06125	Ubiquinone biosynthesis	Metabolism of cofactors and vitamins	4-hydroxybenzoate polyprenyltransferase (COQ2)	XP_019507698.1 PREDICTED: 4-hydroxybenzoate polyprenyltransferase, mitochondrial	6.1e-65	Hipposideros armiger	Q10252 4-hydroxybenzoate polyprenyltransferase, mitochondrial S. pombe 972h- 1 0Q10252	7e-60	COQ2_SCHPO	Y	N	-	-	N	-	N	N
RCo051118	K03183	Ubiquinone biosynthesis	Metabolism of cofactors and vitamins	Demethylmenaquinone methyltransferase / 2-methoxy-6-polyprenyl-1,4-benzoquinol methylase	WP_019418607.1 class I SAM-dependent methyltransferase	5e-56	Anoxybacillus kamchatkensis	A2APY7 NADH dehydrogenase [ubiquinone]1 alpha subcomplex assembly factor 5 M. musculus 0 3A2APY7	4e-05	NDUF5_MOUSE	Y	Y	0.901	-	N	-	Y	N
RCo018821	K22182	Selenocompound metabolism	Metabolism of other amino acids	Thioredoxin reductase (NADPH)	XP_015982517.1 PREDICTED: thioredoxin reductase 1, cytoplasmic isoform X2	9.4e-142	Rousettus aegyptiacus	E7EW10 Thioredoxin reductase 1, cytoplasmic H. sapiens 1 0E7EW10	7e-164	E7EW10_HUMAN	Y	N	0.84	-	N	-	Y	N
RCo024785	K00384	Selenocompound metabolism	Metabolism of other amino acids	Thioredoxin reductase (NADPH)	BAO53980.1 NADPH-dependent thioredoxin reductase	7.4e-122	Euglena gracilis	-	-	-	Y	N	-	-	Y	EG_transcript_14795	N	Y
RCo008916	K00938	Terpenoid backbone biosynthesis	Metabolism of terpenoids and polyketides	Phosphomevalonate kinase	TFK87090.1 phosphomevalonate kinase	7.8e-36	Polyporus arcularius HHB13444	Q9UT88 Probable phosphomevalonate kinase S. pombe 972h- 1 0Q9UT88	4e-22	ERG8_SCHPO	N	N	0.767	-	N	-	Y	N
RCo040067	K05906	Terpenoid backbone biosynthesis	Metabolism of terpenoids and polyketides	Prenylcysteine oxidase / farnesylcysteine lyase	XP_027057464.1 prenylcysteine oxidase 1-like	1.3e-16	Pocillopora damicornis	Q9UHG3 Prenylcysteine oxidase 1 H. sapiens 0 1Q9UHG3	8e-16	PCYOX_HUMAN	N	N	-	-	Y	EG_transcript_9028	N	Y
RCo010174	K05906	Terpenoid backbone biosynthesis	Metabolism of terpenoids and polyketides	Prenylcysteine oxidase / farnesylcysteine lyase	XP_028399919.1 prenylcysteine oxidase-like	1.7e-10	Dendronephthya gigantea	Q9CQF9 Prenylcysteine oxidase M. musculus 0 4Q9CQF9	7e-14	PCYOX_MOUSE	Y	N	-	-	Y	EG_transcript_9028	N	Y
RCo002984	K15889	Terpenoid backbone biosynthesis	Metabolism of terpenoids and polyketides	Prenylcysteine alpha-carboxyl methylesterase	KAF0717692.1 hypothetical protein As57867_002157	5e-40	Aphanomyces stellatus	Q8VCT4 Carboxylesterase 1D M. musculus 0 5Q8VCT4	2e-07	CES1D_MOUSE	Y	N	0.823	-	N	-	Y	N
RCo025376	K01641	Terpenoid backbone biosynthesis	Metabolism of terpenoids and polyketides	Hydroxymethylglutaryl-CoA synthase	PZN29072.1 hydroxymethylglutaryl-CoA synthase	2.2e-83	Proteobacteria bacterium	P54868 Hydroxymethylglutaryl-CoA synthase, mitochondrial H. sapiens 0 1P54868	0.0006	HMCS2_HUMAN	N	N	-	-	Y	EG_transcript_5258	N	Y
RCo032296	K05906	Terpenoid backbone biosynthesis	Metabolism of terpenoids and polyketides	Prenylcysteine oxidase / farnesylcysteine lyase	HCI82568.1 hypothetical protein	1.9e-13	Ktedonobacter sp.	-	-	-	N	N	-	-	Y	EG_transcript_9028	N	Y
RCo042409	K00021	Terpenoid backbone biosynthesis	Metabolism of terpenoids and polyketides	Hydroxymethylglutaryl-CoA reductase (NADPH)	XP_001566943.1 putative 3-hydroxy-3-methylglutaryl-CoA reductase	2.6e-24	Leishmania braziliensis MHOM/BR/75/M2904	-	-	-	Y	N	0.933	0.981	N	-	N	N
RCo046741	K00804	Terpenoid backbone biosynthesis	Metabolism of terpenoids and polyketides	Geranylgeranyl diphosphate synthase, type III	PLN75673.1 terpenoid synthase	2.6e-34	Aspergillus taichungensis	-	-	-	Y	N	-	-	Y	EG_transcript_2347	N	Y
RCo014679	K01641	Terpenoid backbone biosynthesis	Metabolism of terpenoids and polyketides	Hydroxymethylglutaryl-CoA synthase	TNE50670.1 hydroxymethylglutaryl-CoA synthase family protein	1.1e-49	Deltaproteobacteria bacterium	-	-	-	Y	N	0.94	0.999	N	-	N	N
RCo047282	K00021	Terpenoid backbone biosynthesis	Metabolism of terpenoids and polyketides	Hydroxymethylglutaryl-CoA reductase (NADPH)	KAE9431602.1 hypothetical protein GE061_22520	1e-75	Apolygus lucorum	-	-	-	N	N	-	-	Y	EG_transcript_10083	N	Y
RCo003987	K07071	Poorly characterized	Not Included in Pathway or Brite	Uncharacterized protein	XP_030831872.1 epimerase family protein SDR39U1	1.8e-66	Strongylocentrotus purpuratus	Q5M8N4 Epimerase family protein SDR39U1 M. musculus 0 1Q5M8N4	1e-73	D39U1_MOUSE	Y	N	-	0.775	N	-	Y	N
RCo027164	K07000	Poorly characterized	Not Included in Pathway or Brite	Uncharacterized protein	MBH25782.1 alpha/beta hydrolase	1.1e-34	Myxococcales bacterium	Q6PE15 Mycophenolic acid acyl-glucuronide esterase, mitochondrial M. musculus 0 15Q6PE15	8e-07	ABHDA_MOUSE	Y	N	-	-	Y	EG_transcript_34023	N	Y
RCo000288	K06889	Poorly characterized	Not Included in Pathway or Brite	Uncharacterized protein	WP_083423096.1 alpha/beta hydrolase	3.7e-15	Stigmatella aurantiaca	-	-	-	Y	N	-	-	Y	EG_transcript_20656	N	Y
RCo002982	K06929	Poorly characterized	Not Included in Pathway or Brite	Uncharacterized protein	WP_148809913.1 CoA-binding protein	1.1e-16	Crassaminicella sp. SY095	-	-	-	N	N	-	-	Y	EG_transcript_31783	N	Y
RCo021223	K06889	Poorly characterized	Not Included in Pathway or Brite	Uncharacterized protein	WP_083423096.1 alpha/beta hydrolase	4.4e-17	Stigmatella aurantiaca	-	-	-	N	N	-	-	Y	EG_transcript_20656	N	Y
RCo016562	K07001	Poorly characterized	Not Included in Pathway or Brite	NTE family protein	WP_092076413.1 patatin	1.8e-23	Desulfuromonas thiophila	-	-	-	N	N	-	-	Y	EG_transcript_13809	N	Y
RCo010631	K06978	Poorly characterized	Not Included in Pathway or Brite	Uncharacterized protein	HAJ34214.1 hypothetical protein	1.7e-36	Chloroflexi bacterium	-	-	-	N	N	0.508	-	Y	EG_transcript_17590	N	Y
RCo048831	K13696	Poorly characterized	Not Included in Pathway or Brite	Abhydrolase domain-containing protein 1/3	WP_119917759.1 alpha/beta fold hydrolase	1.6e-36	Alcanivorax profundi	-	-	-	Y	N	-	-	Y	EG_transcript_18129	N	Y
RCo051842	K06978	Poorly characterized	Not Included in Pathway or Brite	Uncharacterized protein	RMG92634.1 CocE/NonD family hydrolase	5.2e-38	Chloroflexi bacterium	-	-	-	Y	N	-	-	Y	EG_transcript_17590	N	Y
RCo013182	K09958	Poorly characterized	Not Included in Pathway or Brite	Uncharacterized protein	WP_073489868.1 nuclear transport factor 2 family protein	9.6e-49	Streptoalloteichus hindustanus	-	-	-	Y	Y	0.926	0.958	Y	EG_transcript_37550	N	Y
RCo027104	K06978	Poorly characterized	Not Included in Pathway or Brite	Uncharacterized protein	TVR23828.1 CocE/NonD family hydrolase	4.4e-78	Anaerolineaceae bacterium	-	-	-	Y	N	-	-	Y	EG_transcript_17590	N	Y
RCo037997	K06978	Poorly characterized	Not Included in Pathway or Brite	Uncharacterized protein	RMG77435.1 CocE/NonD family hydrolase	2.2e-87	Chloroflexi bacterium	-	-	-	Y	N	0.509	-	Y	EG_transcript_17590	N	Y
RCo050914	K09181	Unclassified: metabolism	Not Included in Pathway or Brite	Acetyltransferase	ANM86835.1 acyl-CoA synthetase	1.1e-113	Stygiella incarcerata	| organism=Trichomonas_vaginalis_G3 | product=conserved hypothetical protein | location=DS113656:21526-23874(+) | length=783	1e-69	TVAG_321030	Y	N	0.898	0.572	Y	EG_transcript_2698	Y	Y
RCo030312	K00939	Purine metabolism	Nucleotide metabolism	Adenylate kinase	RLF26842.1 hypothetical protein DRN01_03850	8e-75	Thermoplasmata archaeon	Q9WTP6 Adenylate kinase 2, mitochondrial M. musculus 0 25Q9WTP6	6e-19	KAD2_MOUSE	Y	N	0.568	-	N	-	Y	N
RCo045748	K00940	Purine metabolism	Nucleotide metabolism	Nucleoside-diphosphate kinase	XP_004356680.1 nucleoside diphosphate kinase	5.7e-83	Acanthamoeba castellanii str. Neff	Q9WV85 Nucleoside diphosphate kinase 3 M. musculus 0 8Q9WV85	2e-10	NDK3_MOUSE	Y	N	0.925	0.873	N	-	Y	N
RCo000983	K01510	Purine metabolism	Nucleotide metabolism	Apyrase	XP_019632807.1 PREDICTED: ectonucleoside triphosphate diphosphohydrolase 8-like	6.8e-34	Branchiostoma belcheri	-	-	-	Y	N	-	-	Y	EG_transcript_12026	N	Y
RCo024154	K01510	Purine metabolism	Nucleotide metabolism	Apyrase	KXN69900.1 nucleoside phosphatase GDA1/CD39	7.8e-37	Conidiobolus coronatus NRRL 28638	-	-	-	N	N	-	-	Y	EG_transcript_12026	N	Y
RCo000981	K01510	Purine metabolism	Nucleotide metabolism	Apyrase	XP_019632807.1 PREDICTED: ectonucleoside triphosphate diphosphohydrolase 8-like	1.2e-41	Branchiostoma belcheri	-	-	-	N	N	-	-	Y	EG_transcript_12026	N	Y
RCo004490	K00942	Purine metabolism	Nucleotide metabolism	Guanylate kinase	XP_003577305.1 guanylate kinase 1	9.2e-43	Brachypodium distachyon	-	-	-	Y	N	-	-	Y	EG_transcript_24336	N	Y
RCo050483	K01510	Purine metabolism	Nucleotide metabolism	Apyrase	RUP46305.1 nucleoside phosphatase family-domain-containing protein	2.4e-45	Jimgerdemannia flammicorona	-	-	-	N	N	-	-	Y	EG_transcript_12026	N	Y
RCo040961	K01120	Purine metabolism	Nucleotide metabolism	3',5'-cyclic-nucleotide phosphodiesterase	CUF07936.1 cAMP-phosphodiesterase D, putative	6.7e-50	Bodo saltans	-	-	-	N	N	-	-	Y	EG_transcript_13675	N	Y
RCo027183	K01120	Purine metabolism	Nucleotide metabolism	3',5'-cyclic-nucleotide phosphodiesterase	XP_028887510.1 putative 3, 5-cyclic nucleotide phosphodiesterase	2e-104	Trypanosoma theileri	-	-	-	N	N	-	-	Y	EG_transcript_13675	N	Y
RCo034971	K01120	Purine metabolism	Nucleotide metabolism	3',5'-cyclic-nucleotide phosphodiesterase	CUI14520.1 cAMP-specific phosphodiesterase, putative	2.2e-118	Bodo saltans	-	-	-	Y	N	-	-	Y	EG_transcript_13675	N	Y
RCo004981	K01431	Pyrimidine metabolism	Nucleotide metabolism	beta-ureidopropionase	PRW56067.1 beta-ureidopropionase	8e-130	Chlorella sorokiniana	P49954 Probable hydrolase NIT3 S. cerevisiae S288c 2 3P49954	2e-16	NIT3_YEAST	N	N	0.636	-	N	-	Y	N
RCo011287	K00254	Pyrimidine metabolism	Nucleotide metabolism	Dihydroorotate dehydrogenase	KAF0298039.1 Dihydroorotate dehydrogenase (quinone), mitochondrial	1.6e-15	Amphibalanus amphitrite	O35435 Dihydroorotate dehydrogenase (quinone), mitochondrial M. musculus 0 13O35435	1e-14	PYRD_MOUSE	Y	N	0.866	0.816	Y	EG_transcript_8554	Y	Y
RCo020749	K00254	Pyrimidine metabolism	Nucleotide metabolism	Dihydroorotate dehydrogenase	WP_119288630.1 quinone-dependent dihydroorotate dehydrogenase	2.4e-13	Streptomyces sp. YIM 130001	-	-	-	N	N	-	-	Y	EG_transcript_10912	N	Y
RCo031377	K01511	Pyrimidine metabolism	Nucleotide metabolism	Ectonucleoside triphosphate diphosphohydrolase 5/6	GBF90831.1 apyrase-like	6e-22	Raphidocelis subcapitata	-	-	-	N	N	-	-	Y	EG_transcript_16441	N	Y
RCo018361	K01513	Pyrimidine metabolism	Nucleotide metabolism	Ectonucleotide pyrophosphatase/phosphodiesterase family member 1/3	XP_028399265.1 uncharacterized protein LOC114522719	2.8e-57	Dendronephthya gigantea	-	-	-	Y	N	-	-	Y	EG_transcript_16705	N	Y
RCo033059	K10773	DNA repair and recombination proteins	Protein families: genetic information processing	Endonuclease III	XP_003291295.1 hypothetical protein DICPUDRAFT_155881	2.8e-64	Dictyostelium purpureum	Q08214 DNA base excision repair N-glycosylase 2 S. cerevisiae S288c 1 0Q08214	1e-53	NTG2_YEAST	Y	N	0.9	0.507	N	-	Y	N
RCo029645	K10863	DNA repair and recombination proteins	Protein families: genetic information processing	Aprataxin	XP_016271103.1 histidine triad nucleotide binding protein	5.5e-13	Rhodotorula toruloides NP11	Q9D0S9 Histidine triad nucleotide-binding protein 2, mitochondrial M. musculus 0 23Q9D0S9	0.0001	HINT2_MOUSE	N	N	0.91	0.611	N	-	Y	N
RCo036955	K12173	DNA repair and recombination proteins	Protein families: genetic information processing	BRCA1-A complex subunit BRE	-	-	-	-	-	-	N	N	0.636	-	N	-	N	N
RCo038802	K10570	DNA repair and recombination proteins	Protein families: genetic information processing	DNA excision repair protein ERCC-8	KMZ70171.1 hypothetical protein ZOSMA_1G01430	6.4e-13	Zostera marina	-	-	-	Y	N	0.617	0.471	N	-	N	N
RCo023889	K09493	Chaperones and folding catalysts	Protein families: genetic information processing	T-complex protein 1 alpha subunit	GAQ77990.1 T-complex protein 1 alpha subunit	2e-165	Klebsormidium nitens	P11983 T-complex protein 1 subunit alpha M. musculus 0 3P11983	0	TCPA_MOUSE	N	N	0.751	-	N	-	Y	N
RCo014087	K09490	Chaperones and folding catalysts	Protein families: genetic information processing	Heat shock 70kDa protein 5	EKF38327.1 glucose-regulated protein 78, putative	2.4e-249	Trypanosoma cruzi marinkellei	P63017 Heat shock cognate 71 kDa protein M. musculus 0 8P63017	0	HSP7C_MOUSE	N	N	-	-	Y	EG_transcript_3760	N	Y
RCo003964	K03671	Chaperones and folding catalysts	Protein families: genetic information processing	Thioredoxin 1	TKA76361.1 hypothetical protein B0A49_06089	5.9e-20	Cryomyces minteri	P10599 Thioredoxin H. sapiens 0 1P10599	7e-24	THIO_HUMAN	N	N	-	-	Y	EG_transcript_34359	N	Y
RCo000317	K03671	Chaperones and folding catalysts	Protein families: genetic information processing	Thioredoxin 1	XP_022781475.1 thioredoxin-like	5.8e-20	Stylophora pistillata	P25372 Thioredoxin-3, mitochondrial S. cerevisiae S288c 3 4P25372	3e-23	TRX3_YEAST	Y	N	-	-	Y	EG_transcript_34359	N	Y
RCo042325	K03676	Chaperones and folding catalysts	Protein families: genetic information processing	Glutaredoxin 3	TVU15303.1 hypothetical protein EJB05_38817	3.7e-24	Eragrostis curvula	P17695 Glutaredoxin-2, mitochondrial S. cerevisiae S288c 0 4P17695	1e-20	GLRX2_YEAST	Y	N	0.892	0.952	N	-	Y	N
RCo009029	K09515	Chaperones and folding catalysts	Protein families: genetic information processing	DnaJ homolog subfamily B member 9	XP_013756303.1 hypothetical protein AMSG_12064	3.2e-09	Thecamonas trahens ATCC 50062	P87239 DnaJ homolog 1, mitochondrial S. pombe 972h- 1 0P87239	8e-08	MDJ1_SCHPO	Y	N	0.893	-	N	-	Y	N
RCo016585	K09584	Chaperones and folding catalysts	Protein families: genetic information processing	Disulfide-isomerase	KXS20406.1 hypothetical protein M427DRAFT_66424	2.7e-19	Gonapodya prolifera JEL478	O13704 Thioredoxin domain-containing protein C13F5.05, mitochondrial S. pombe 972h- 1 0O13704	5e-07	YEU5_SCHPO	N	N	0.859	-	N	-	Y	N
RCo023557	K13993	Chaperones and folding catalysts	Protein families: genetic information processing	HSP20 family protein	-	-	-	-	-	-	N	N	-	-	Y	EG_transcript_29914	N	Y
RCo040085	K09527	Chaperones and folding catalysts	Protein families: genetic information processing	DnaJ homolog subfamily C member 7	-	-	-	-	-	-	N	N	-	-	Y	EG_transcript_6026	N	Y
RCo025263	K09531	Chaperones and folding catalysts	Protein families: genetic information processing	DnaJ homolog subfamily C member 11	KAE9613149.1 putative dnaJ-like protein C11	1.1e-08	Lupinus albus	-	-	-	Y	N	-	-	Y	EG_transcript_4313	N	Y
RCo047913	K09531	Chaperones and folding catalysts	Protein families: genetic information processing	DnaJ homolog subfamily C member 11	EKF38747.1 chaperone DNAJ protein, putative	1.7e-11	Trypanosoma cruzi marinkellei	-	-	-	N	N	-	-	Y	EG_transcript_33942	N	Y
RCo054701	K03671	Chaperones and folding catalysts	Protein families: genetic information processing	Thioredoxin 1	XP_004363764.1 thioredoxin	4.8e-12	Capsaspora owczarzaki ATCC 30864	-	-	-	Y	N	0.711	0.79	Y	EG_transcript_34359	N	Y
RCo054702	K03671	Chaperones and folding catalysts	Protein families: genetic information processing	Thioredoxin 1	XP_004363764.1 thioredoxin	4.8e-12	Capsaspora owczarzaki ATCC 30864	-	-	-	Y	N	-	-	Y	EG_transcript_34359	N	Y
RCo055625	K09527	Chaperones and folding catalysts	Protein families: genetic information processing	DnaJ homolog subfamily C member 7	RVE51205.1 hypothetical protein evm_004170	2.2e-15	Chilo suppressalis	-	-	-	N	N	-	-	Y	EG_transcript_6026	N	Y
RCo008447	K03671	Chaperones and folding catalysts	Protein families: genetic information processing	Thioredoxin 1	KXZ49504.1 hypothetical protein GPECTOR_21g730	2.6e-18	Gonium pectorale	-	-	-	Y	N	-	-	Y	EG_transcript_34359	N	Y
RCo054699	K03671	Chaperones and folding catalysts	Protein families: genetic information processing	Thioredoxin 1	XP_004363764.1 thioredoxin	3.1e-19	Capsaspora owczarzaki ATCC 30864	-	-	-	N	N	-	-	Y	EG_transcript_34359	N	Y
RCo043345	K13993	Chaperones and folding catalysts	Protein families: genetic information processing	HSP20 family protein	TFJ81159.1 hypothetical protein NSK_007503	5e-20	Nannochloropsis salina CCMP1776	-	-	-	Y	N	0.803	-	Y	EG_transcript_29914	N	Y
RCo027585	K03671	Chaperones and folding catalysts	Protein families: genetic information processing	Thioredoxin 1	PYI16021.1 putative thioredoxin	9.6e-21	Aspergillus violaceofuscus CBS 115571	-	-	-	N	N	-	-	Y	EG_transcript_34359	N	Y
RCo009076	K03671	Chaperones and folding catalysts	Protein families: genetic information processing	Thioredoxin 1	ASU92296.1 Trx1	1.3e-21	Babesia microti	-	-	-	Y	N	0.945	0.953	Y	EG_transcript_34359	N	Y
RCo020878	K03686	Chaperones and folding catalysts	Protein families: genetic information processing	Molecular chaperone DnaJ	XP_026767787.1 dnaJ homolog subfamily B member 2 isoform X3	5.1e-26	Pangasianodon hypophthalmus	-	-	-	N	N	-	-	N	-	N	N
RCo029636	K09568	Chaperones and folding catalysts	Protein families: genetic information processing	FK506-binding protein 1; peptidylprolyl isomerase	ABO26659.1 peptidyl-prolyl cis-trans isomerase	4.2e-29	Haliotis discus discus	-	-	-	Y	N	-	-	Y	EG_transcript_45178	N	Y
RCo006698	K09568	Chaperones and folding catalysts	Protein families: genetic information processing	FK506-binding protein 1; peptidylprolyl isomerase	CCW61986.1 unnamed protein product	3.4e-31	Phytomonas sp. isolate EM1	-	-	-	N	N	0.725	-	Y	EG_transcript_45178	N	Y
RCo000202	K09568	Chaperones and folding catalysts	Protein families: genetic information processing	FK506-binding protein 1; peptidylprolyl isomerase	XP_006792258.1 PREDICTED: peptidyl-prolyl cis-trans isomerase FKBP1A-like	9.8e-33	Neolamprologus brichardi	-	-	-	N	N	-	-	Y	EG_transcript_45178	N	Y
RCo029634	K09568	Chaperones and folding catalysts	Protein families: genetic information processing	FK506-binding protein 1; peptidylprolyl isomerase	VZI05772.1 unnamed protein product	1.1e-33	Sparganum proliferum	-	-	-	Y	N	-	-	Y	EG_transcript_45178	N	Y
RCo028296	K09568	Chaperones and folding catalysts	Protein families: genetic information processing	FK506-binding protein 1; peptidylprolyl isomerase	XP_020167461.1 peptidyl-prolyl cis-trans isomerase FKBP12	4.1e-42	Aegilops tauschii subsp. tauschii	-	-	-	Y	N	-	-	Y	EG_transcript_48153	N	Y
RCo040539	K03671	Chaperones and folding catalysts	Protein families: genetic information processing	Thioredoxin 1	PZP31544.1 thiol reductase thioredoxin	1.2e-52	Roseateles depolymerans	-	-	-	N	N	0.606	-	Y	EG_transcript_34359	N	Y
RCo009554	K03667	Chaperones and folding catalysts	Protein families: genetic information processing	ATP-dependent HslUV protease ATP-binding subunit HslU	EKF38664.1 heat shock protein	2.6e-120	Trypanosoma cruzi marinkellei	-	-	-	N	N	0.905	1	Y	EG_transcript_12798	N	Y
RCo038529	K03667	Chaperones and folding catalysts	Protein families: genetic information processing	ATP-dependent HslUV protease ATP-binding subunit HslU	EPY27742.1 ATP-dependent HslUV protease ATP-binding protein subunit HslU	3.6e-125	Strigomonas culicis	-	-	-	N	N	0.672	0.387	Y	EG_transcript_12798	N	Y
RCo023852	K03695	Chaperones and folding catalysts	Protein families: genetic information processing	ATP-dependent Clp protease subunit; heat shock protein 78 (HSP78); putative	OAQ22584.1 hypothetical protein K457DRAFT_150588	2.6e-161	Mortierella elongata AG-77	-	-	-	N	N	-	-	Y	EG_transcript_5315	N	Y
RCo045525	K09490	Chaperones and folding catalysts	Protein families: genetic information processing	Heat shock 70kDa protein 5	MQL89991.1 hypothetical protein	2.1e-176	Colocasia esculenta	-	-	-	N	N	-	-	Y	EG_transcript_3760	N	Y
RCo035994	K09490	Chaperones and folding catalysts	Protein families: genetic information processing	Heat shock 70kDa protein 5	XP_009308651.1 putative glucose-regulated protein 78	4.7e-177	Trypanosoma grayi	-	-	-	N	N	-	-	Y	EG_transcript_3760	N	Y
RCo018788	K09490	Chaperones and folding catalysts	Protein families: genetic information processing	Heat shock 70kDa protein 5	XP_003064665.1 heat shock protein 70 with TPR repeat	4.3e-179	Micromonas pusilla CCMP1545	-	-	-	Y	N	-	-	Y	EG_transcript_3760	N	Y
RCo033774	K09488	Chaperones and folding catalysts	Protein families: genetic information processing	TNF receptor-associated protein 1 (HSP84)	ANB27674.1 heat shock protein	5.4e-181	Perkinsela sp. SMB-60	-	-	-	N	N	0.914	0.973	Y	EG_transcript_3547	N	Y
RCo018622	K09490	Chaperones and folding catalysts	Protein families: genetic information processing	Heat shock 70kDa protein 5	XP_009308651.1 putative glucose-regulated protein 78	1.6e-200	Trypanosoma grayi	-	-	-	N	N	-	-	Y	EG_transcript_3760	N	Y
RCo007436	K03695	Chaperones and folding catalysts	Protein families: genetic information processing	ATP-dependent Clp protease subunit; heat shock protein 78 (HSP78); putative	KPI83262.1 ATP-dependent Clp protease subunit	2.3e-262	Leptomonas seymouri	-	-	-	N	N	0.923	0.988	Y	EG_transcript_5315	N	Y
RCo038967	K09490	Chaperones and folding catalysts	Protein families: genetic information processing	Heat shock 70kDa protein 5	RHW68443.1 heat shock 70 kDa protein	1.4e-289	Trypanosoma brucei equiperdum	-	-	-	N	N	-	-	Y	EG_transcript_3760	N	Y
RCo030792	K16465	Chromosome and associated proteins	Protein families: genetic information processing	Centrin	CUG86137.1 centrin, putative	6.3e-59	Bodo saltans	P02600 Myosin light chain 1/3, skeletal muscle isoform R. norvegicus 0 2P02600	2e-19	MYL1_RAT	Y	N	0.614	-	N	-	Y	N
RCo004438	K07944	Chromosome and associated proteins	Protein families: genetic information processing	ADP-ribosylation factor-like protein 3	QDZ21133.1 ADP-ribosylation factor-like GTPase	2.1e-67	Chloropicon primus	| organism=Trichomonas_vaginalis_G3 | product=small GTPase rabi, putative | location=DS115209:417-1004(+) | length=196	6e-10	TVAG_085320	N	N	-	-	Y	EG_transcript_33347	N	Y
RCo004446	K07944	Chromosome and associated proteins	Protein families: genetic information processing	ADP-ribosylation factor-like protein 3	CBN76011.1 ARL3, ARF-like Ras superfamily GTPase	1.3e-54	Ectocarpus siliculosus	| organism=Trichomonas_vaginalis_G3 | product=RAC, putative | location=DS113199:35116-35739(-) | length=208	3e-09	TVAG_192440	Y	N	-	-	Y	EG_transcript_33347	N	Y
RCo031129	K20790	Chromosome and associated proteins	Protein families: genetic information processing	Nucleoside diphosphate kinase homolog 5	KFP42583.1 Nucleoside diphosphate kinase 5, partial	3e-11	Chlamydotis macqueenii	-	-	-	N	N	-	-	Y	EG_transcript_38693	N	Y
RCo051099	K18417	Chromosome and associated proteins	Protein families: genetic information processing	ERI1 exoribonuclease 2	WP_070883150.1 exonuclease	6.9e-12	Pseudomonas seleniipraecipitans	-	-	-	N	N	0.879	0.575	Y	EG_transcript_16639	N	Y
RCo013345	K03978	Chromosome and associated proteins	Protein families: genetic information processing	GTP-binding protein	XP_005707864.1 GTP-binding protein	4.7e-20	Galdieria sulphuraria	-	-	-	Y	N	0.718	0.821	Y	EG_transcript_7639	N	Y
RCo023707	K11407	Chromosome and associated proteins	Protein families: genetic information processing	Histone deacetylase	PYQ64658.1 histone deacetylase	4.1e-31	Acidobacteria bacterium	-	-	-	N	N	-	-	Y	EG_transcript_15547	N	Y
RCo046599	K11493	Chromosome and associated proteins	Protein families: genetic information processing	Regulator of chromosome condensation	CCA14713.1 regulator of chromosome condensation (RCC1)like protein putative	3.3e-32	Albugo laibachii Nc14	-	-	-	Y	N	0.712	0.889	Y	EG_transcript_8322	N	Y
RCo046994	K07944	Chromosome and associated proteins	Protein families: genetic information processing	ADP-ribosylation factor-like protein 3	CBN76011.1 ARL3, ARF-like Ras superfamily GTPase	1.1e-63	Ectocarpus siliculosus	-	-	-	N	N	-	-	Y	EG_transcript_33347	N	Y
RCo021047	K11407	Chromosome and associated proteins	Protein families: genetic information processing	Histone deacetylase	PYR85306.1 histone deacetylase	1.9e-83	Acidobacteria bacterium	-	-	-	Y	N	0.961	0.991	Y	EG_transcript_15547	N	Y
RCo045097	K11407	Chromosome and associated proteins	Protein families: genetic information processing	Histone deacetylase	XP_004346003.1 hypothetical protein ACA1_184050	9.8e-87	Acanthamoeba castellanii str. Neff	-	-	-	N	N	0.833	-	Y	EG_transcript_15547	N	Y
RCo054963	K05692	Chromosome and associated proteins	Protein families: genetic information processing	Actin beta/gamma 1	XP_020088267.1 actin-2-like	1.2e-99	Ananas comosus	-	-	-	N	N	-	-	Y	EG_transcript_12806	N	Y
RCo039117	K05692	Chromosome and associated proteins	Protein families: genetic information processing	Actin beta/gamma 1	O65314.1 RecName: Full=Actin	3.5e-104	Scherffelia dubia	-	-	-	N	N	-	-	Y	EG_transcript_12806	N	Y
RCo044078	K05692	Chromosome and associated proteins	Protein families: genetic information processing	Actin beta/gamma 1	XP_023220692.1 alpha-centractin	7.2e-110	Centruroides sculpturatus	-	-	-	N	N	-	-	Y	EG_transcript_12806	N	Y
RCo039943	K05692	Chromosome and associated proteins	Protein families: genetic information processing	Actin beta/gamma 1	AAC99646.1 actin	1.3e-199	Euglena gracilis	-	-	-	Y	N	-	-	Y	EG_transcript_12806	N	Y
RCo011256	K07918	Membrane trafficking	Protein families: genetic information processing	Ras-related protein Rab-32	XP_002674396.1 rab family small GTPase	1.1e-68	Naegleria gruberi strain NEG-M	| organism=Trichomonas_vaginalis_G3 | product=Rab32, putative | location=DS113179:139017-139661(-) | length=215	1e-63	TVAG_185340	N	N	-	-	Y	EG_transcript_21240	N	Y
RCo009157	K07893	Membrane trafficking	Protein families: genetic information processing	Rab6, RAS family GTPase	KAF0979953.1 hypothetical protein FDP41_001106	6.6e-52	Naegleria fowleri	| organism=Trichomonas_vaginalis_G3 | product=RAB-18, putative | location=DS113459:19752-20380(+) | length=201	5e-49	TVAG_416520	N	N	0.539	-	N	-	Y	N
RCo012517	K06027	Membrane trafficking	Protein families: genetic information processing	Vesicle-fusing ATPase	ETO26842.1 N-ethylmaleimide sensitive fusion protein	9.5e-56	Reticulomyxa filosa	P25694 Cell division control protein 48 S. cerevisiae S288c 0 1P25694	4e-38	CDC48_YEAST	N	N	0.648	-	N	-	Y	N
RCo012764	K07955	Membrane trafficking	Protein families: genetic information processing	ADP-ribosylation factor-like protein 8	XP_002509229.1 predicted protein	1.8e-15	Micromonas commoda	| organism=Trichomonas_vaginalis_G3 | product=RAB, putative | location=DS113217:43903-44511(-) | length=203	0.0003	TVAG_462450	N	N	0.692	-	N	-	Y	N
RCo007973	K24068	Membrane trafficking	Protein families: genetic information processing	Multiple epidermal growth factor-like domains protein 10/11	CUG90566.1 transmembrane protein, putative, partial	5.6e-35	Bodo saltans	P09055 Integrin beta-1 M. musculus 0 3P09055	0.0003	ITB1_MOUSE	N	N	0.874	0.633	N	-	Y	N
RCo011678	K19525	Membrane trafficking	Protein families: genetic information processing	Vacuolar protein sorting-associated protein 13A/C	KAF0974619.1 hypothetical protein FDP41_006093	4.5e-07	Naegleria fowleri	-	-	-	N	N	-	-	Y	EG_transcript_19	N	Y
RCo051326	K08486	Membrane trafficking	Protein families: genetic information processing	Syntaxin 1B/2/3; target SNARE	XP_009307214.1 putative target SNARE	1.3e-34	Trypanosoma grayi	-	-	-	N	N	-	-	Y	EG_transcript_17067	N	Y
RCo029215	K12483	Membrane trafficking	Protein families: genetic information processing	EH domain-containing protein 1	EWM27210.1 rme1-like gtpase atpase without a c-terminal eh domain protein	1.9e-42	Nannochloropsis gaditana	-	-	-	N	N	-	-	Y	EG_transcript_7126	N	Y
RCo021455	K19525	Membrane trafficking	Protein families: genetic information processing	Vacuolar protein sorting-associated protein 13A/C	KAF0974619.1 hypothetical protein FDP41_006093	2.6e-60	Naegleria fowleri	-	-	-	N	N	-	-	Y	EG_transcript_19	N	Y
RCo007307	K18758	Messenger RNA biogenesis	Protein families: genetic information processing	DIS3-like exonuclease 2	XP_003283598.1 hypothetical protein DICPUDRAFT_96430	3.2e-90	Dictyostelium purpureum	Q08162 Exosome complex exonuclease DIS3 S. cerevisiae S288c 0 3Q08162	8e-67	RRP44_YEAST	N	N	-	-	Y	EG_transcript_1172	N	Y
RCo006691	K00987	Messenger RNA biogenesis	Protein families: genetic information processing	mRNA guanylyltransferase	XP_003748458.1 mRNA-capping enzyme	4.8e-14	Galendromus occidentalis	P00568 Adenylate kinase isoenzyme 1 H. sapiens 0 6P00568	4e-07	KAD1_HUMAN	N	N	0.646	-	N	-	Y	N
RCo015991	K14326	Messenger RNA biogenesis	Protein families: genetic information processing	Regulator of nonsense transcripts 1	XP_008122904.2 PREDICTED: NFX1-type zinc finger-containing protein 1, partial	8.7e-50	Anolis carolinensis	Q234P9 ATP-dependent protease La T. thermophila SB210 0 1Q234P9	0.0002	Q234P9_TETTS	Y	N	0.523	-	N	-	Y	N
RCo000197	K12035	Messenger RNA biogenesis	Protein families: genetic information processing	Tripartite motif-containing protein 71	XP_002604522.1 hypothetical protein BRAFLDRAFT_220493, partial	7.5e-10	Branchiostoma floridae	-	-	-	N	N	0.57	-	Y	EG_transcript_10729	N	Y
RCo051189	K14411	Messenger RNA biogenesis	Protein families: genetic information processing	Glycine-rich RNA-binding protein 4; RNA-binding protein RBP6	WP_096327222.1 hypothetical protein	6.1e-16	Nannocystis exedens	-	-	-	Y	N	-	-	Y	EG_transcript_39982	N	Y
RCo012740	K14407	Messenger RNA biogenesis	Protein families: genetic information processing	Cleavage stimulation factor subunit 2	XP_023878814.1 cleavage stimulation factor subunit 2 tau variant-like	3.3e-20	Quercus suber	-	-	-	Y	N	-	-	N	-	N	N
RCo029171	K14079	Messenger RNA biogenesis	Protein families: genetic information processing	Poly(A) polymerase	XP_026199974.1 poly(A) RNA polymerase GLD2	1.3e-20	Anabas testudineus	-	-	-	N	N	-	-	N	-	N	N
RCo038060	K19612	Messenger RNA biogenesis	Protein families: genetic information processing	2',5'-phosphodiesterase	XP_002178528.1 predicted protein, partial	3.9e-26	Phaeodactylum tricornutum CCAP 1055/1	-	-	-	Y	N	0.844	-	Y	EG_transcript_15463	N	Y
RCo047015	K12812	Messenger RNA biogenesis	Protein families: genetic information processing	ATP-dependent RNA helicase UAP56/SUB2	XP_009376926.1 PREDICTED: DEAD-box ATP-dependent RNA helicase 56-like	2.4e-149	Pyrus x bretschneideri	-	-	-	N	N	-	-	Y	EG_transcript_10531	N	Y
RCo035740	K18758	Messenger RNA biogenesis	Protein families: genetic information processing	DIS3-like exonuclease 2	XP_022091521.1 exosome complex exonuclease RRP44-like	6.9e-163	Acanthaster planci	-	-	-	N	N	-	-	Y	EG_transcript_1172	N	Y
RCo013794	K12614	Messenger RNA biogenesis	Protein families: genetic information processing	ATP-dependent RNA helicase DDX6/DHH1	XP_031486568.1 DEAD-box ATP-dependent RNA helicase 8-like	5.9e-185	Nymphaea colorata	-	-	-	N	N	-	-	Y	EG_transcript_5941	N	Y
RCo003131	K17795	Mitochondrial biogenesis	Protein families: genetic information processing	Mitochondrial import inner membrane translocase subunit TIM17	-	-	-	P39515 Mitochondrial import inner membrane translocase subunit TIM17 S. cerevisiae S288c 1 2P39515	9e-09	TIM17_YEAST	Y	N	-	-	Y	EG_transcript_30195	N	Y
RCo040212	K17805	Mitochondrial biogenesis	Protein families: genetic information processing	Mitochondrial import inner membrane translocase subunit TIM16	-	-	-	Q9C1W5 Mitochondrial import inner membrane translocase subunit tim16 S. pombe 972h- 1 0Q9C1W5	2e-06	TIM16_SCHPO	Y	N	-	-	N	-	N	N
RCo045932	K04043	Mitochondrial biogenesis	Protein families: genetic information processing	Molecular chaperone DnaK (Ssq1)	XP_011087985.1 heat shock 70 kDa protein, mitochondrial	5.3e-169	Sesamum indicum	Q9LDZ0 Heat shock 70 kDa protein 10, mitochondrial A. thaliana 0 6Q9LDZ0	0	HSP7J_ARATH	N	N	0.783	0.828	Y	EG_transcript_5157	Y	Y
RCo039561	K17732	Mitochondrial biogenesis	Protein families: genetic information processing	Mitochondrial-processing peptidase subunit beta/complex III subunit	BAA04079.2 complex III subunit I precursor, partial	1.7e-175	Euglena gracilis	Q9VFF0 GH01077p D. melanogaster 0 1Q9VFF0	2e-126	Q9VFF0_DROME	N	N	-	-	Y	EG_transcript_25719	N	Y
RCo011359	K08900	Mitochondrial biogenesis	Protein families: genetic information processing	Complex III (ubiquinol-cytochrome c reductase) assembly factor, chaperone BCS1	CUG07513.1 ATP-dependent chaperone, putative	1.9e-99	Bodo saltans	Q9Y276 Mitochondrial chaperone BCS1 H. sapiens 0 5Q9Y276	2e-110	BCS1_HUMAN	Y	N	0.643	-	Y	EG_transcript_12438	Y	Y
RCo014258	K17080	Mitochondrial biogenesis	Protein families: genetic information processing	Prohibitin 1	PTQ40355.1 hypothetical protein MARPO_0040s0040	1.5e-73	Marchantia polymorpha	O04331 Prohibitin-3, mitochondrial A. thaliana 0 7O04331	8e-103	PHB3_ARATH	N	N	-	-	Y	EG_transcript_24888	N	Y
RCo017914	K10908	Mitochondrial biogenesis	Protein families: genetic information processing	DNA-directed RNA polymerase, mitochondrial	XP_021634642.1 DNA-directed RNA polymerase 3B, chloroplastic isoform X2	3e-92	Manihot esculenta	O00411 DNA-directed RNA polymerase, mitochondrial H. sapiens 0 2O00411	9e-94	RPOM_HUMAN	N	N	-	-	Y	EG_transcript_2545	N	Y
RCo022229	K17081	Mitochondrial biogenesis	Protein families: genetic information processing	Prohibitin 2	XP_012758269.1 hypothetical protein SAMD00019534_008480	1.4e-74	Acytostelium subglobosum LB1	O49460 Prohibitin-1, mitochondrial A. thaliana 0 3O49460	1e-92	PHB1_ARATH	N	N	-	-	Y	EG_transcript_16185	N	Y
RCo007645	K03593	Mitochondrial biogenesis	Protein families: genetic information processing	Complex I (NADH dehydrogenase) assembly factor, ATP-binding protein (NUBPL)	WP_092616258.1 Mrp/NBP35 family ATP-binding protein	7.9e-81	Roseospirillum parvum	Q8TB37 Iron-sulfur protein NUBPL H. sapiens 0 2Q8TB37	5e-81	NUBPL_HUMAN	Y	N	-	-	Y	EG_transcript_15209	N	Y
RCo051879	K18798	Mitochondrial biogenesis	Protein families: genetic information processing	Peroxisome-assembly ATPase	XP_012751309.1 hypothetical protein SAMD00019534_089660	9.2e-86	Acytostelium subglobosum LB1	Q8WV93 Lactation elevated protein 1 H. sapiens 0 1Q8WV93	6e-81	LACE1_HUMAN	Y	N	0.973	0.998	Y	EG_transcript_4731	Y	Y
RCo008098	K18914	Mitochondrial biogenesis	Protein families: genetic information processing	Adrenodoxin-NADP+ reductase (FdxR)	OWZ19090.1 NADPH:adrenodoxin oxidoreductase	1.4e-69	Phytophthora megakarya	E7EQC1 NADPH:adrenodoxin oxidoreductase, mitochondrial H. sapiens 0 3E7EQC1	1e-74	E7EQC1_HUMAN	Y	N	0.855	0.87	Y	EG_transcript_18154	Y	Y
RCo023317	K18164	Mitochondrial biogenesis	Protein families: genetic information processing	Complex I (NADH dehydrogenase) 1 alpha subcomplex assembly factor 7 (NDUFAF7)	RKP08407.1 S-adenosyl-L-methionine-dependent methyltransferase	5.3e-69	Thamnocephalis sphaerospora	Q7L592 NADH dehydrogenase [ubiquinone]complex I, assembly factor 7 H. sapiens 1 1Q7L592	4e-73	NDUF7_HUMAN	Y	N	0.953	0.989	Y	EG_transcript_14139	Y	Y
RCo045518	K17800	Mitochondrial biogenesis	Protein families: genetic information processing	LETM1 and EF-hand domain-containing protein 1	XP_024517041.1 plectin	9.1e-55	Selaginella moellendorffii	Q9M1Z2 Putative uncharacterized protein F24G16.90 A. thaliana 0 2Q9M1Z2	2e-66	Q9M1Z2_ARATH	Y	N	0.793	0.616	Y	EG_transcript_6257	Y	Y
RCo030311	K18798	Mitochondrial biogenesis	Protein families: genetic information processing	Peroxisome-assembly ATPase	WP_145343911.1 MULTISPECIES: cell division protein ZapE	4.9e-61	Bacteria	Q3V384 Lactation elevated protein 1 M. musculus 0 14Q3V384	3e-60	LACE1_MOUSE	N	N	0.82	0.532	Y	EG_transcript_4731	Y	Y
RCo019624	K23503	Mitochondrial biogenesis	Protein families: genetic information processing	Sideroflexin 5	XP_005824140.1 hypothetical protein GUITHDRAFT_155055	3.4e-47	Guillardia theta CCMP2712	Q9BWM7 Sideroflexin-3 H. sapiens 0 1Q9BWM7	2e-55	SFXN3_HUMAN	N	N	-	-	Y	EG_transcript_10940	N	Y
RCo029049	K04043	Mitochondrial biogenesis	Protein families: genetic information processing	Molecular chaperone DnaK (Ssq1)	WP_134496923.1 molecular chaperone DnaK	2e-43	Microvirga pakistanensis	P0CS90 Heat shock protein SSC1, mitochondrial S. cerevisiae S288c 1 7P0CS90	2e-53	HSP77_YEAST	Y	N	0.694	-	Y	EG_transcript_7085	Y	Y
RCo000876	K01412	Mitochondrial biogenesis	Protein families: genetic information processing	Mitochondrial-processing peptidase subunit alpha	XP_015662773.1 putative mitochondrial mitochondrial processing peptidase alpha subunit	2.6e-63	Leptomonas pyrrhocoris	O94745 Probable mitochondrial-processing peptidase subunit alpha S. pombe 972h- 1 0O94745	5e-52	MPPA_SCHPO	Y	N	-	-	Y	EG_transcript_8779	N	Y
RCo007516	K23503	Mitochondrial biogenesis	Protein families: genetic information processing	Sideroflexin 5	XP_004347381.2 sideroflexin-5	2.3e-42	Capsaspora owczarzaki ATCC 30864	Q925N0 Sideroflexin-5 M. musculus 0 12Q925N0	4e-50	SFXN5_MOUSE	Y	N	-	-	Y	EG_transcript_10940	N	Y
RCo042333	K22073	Mitochondrial biogenesis	Protein families: genetic information processing	Transferase CAF17, mitochondrial (Iba57)	XP_018124462.1 PREDICTED: putative transferase CAF17 homolog, mitochondrial	2.6e-33	Xenopus laevis	Q09929 Putative transferase caf17, mitochondrial S. pombe 972h- 1 0Q09929	3e-44	CAF17_SCHPO	Y	N	0.845	0.431	Y	EG_transcript_18250	Y	Y
RCo041381	K18162	Mitochondrial biogenesis	Protein families: genetic information processing	Complex I (NADH dehydrogenase) 1 alpha subcomplex assembly factor 5 (NDUFAF5)	KAF0974150.1 hypothetical protein FDP41_006760	1.5e-44	Naegleria fowleri	Q5TEU4 NADH dehydrogenase [ubiquinone]1 alpha subcomplex assembly factor 5 H. sapiens 1 1Q5TEU4	7e-44	NDUF5_HUMAN	N	N	-	-	Y	EG_transcript_16062	N	Y
RCo031535	K22074	Mitochondrial biogenesis	Protein families: genetic information processing	Fe-S cluster scaffold protein (Nfu1)	XP_028881737.1 uncharacterized protein TM35_000212770	1.3e-33	Trypanosoma theileri	Q9UMS0 NFU1 iron-sulfur cluster scaffold homolog, mitochondrial H. sapiens 0 3Q9UMS0	7e-43	NFU1_HUMAN	Y	N	-	-	Y	EG_transcript_27692	N	Y
RCo007976	K07152	Mitochondrial biogenesis	Protein families: genetic information processing	Complex IV (cytochrome c oxidase) assembly factor, protein SCO1	GAV03252.1 hypothetical protein RvY_13704	3.9e-39	Ramazzottius varieornatus	Q8VCL2 Protein SCO2 homolog, mitochondrial M. musculus 0 1Q8VCL2	1e-41	SCO2_MOUSE	Y	N	0.359	0.656	Y	EG_transcript_14855	Y	Y
RCo034171	K07390	Mitochondrial biogenesis	Protein families: genetic information processing	Monothiol glutaredoxin (Grx4)	XP_005826371.1 hypothetical protein GUITHDRAFT_96730	1.2e-29	Guillardia theta CCMP2712	Q86SX6 Glutaredoxin-related protein 5, mitochondrial H. sapiens 0 2Q86SX6	6e-37	GLRX5_HUMAN	N	N	0.696	0.488	Y	EG_transcript_40617	Y	Y
RCo008596	K07152	Mitochondrial biogenesis	Protein families: genetic information processing	Complex IV (cytochrome c oxidase) assembly factor, protein SCO1	EPS94996.1 hypothetical protein FOMPIDRAFT_1133249	3.1e-32	Fomitopsis pinicola FP-58527 SS1	Q5SUC9 Protein SCO1 homolog, mitochondrial M. musculus 0 15Q5SUC9	5e-36	SCO1_MOUSE	Y	N	-	-	N	-	N	N
RCo018360	K03687	Mitochondrial biogenesis	Protein families: genetic information processing	Molecular chaperone GrpE (Mge1)	SCV03152.1 LAMI_0H05886g1_1	3.3e-27	Lachancea mirantina	P38523 GrpE protein homolog, mitochondrial S. cerevisiae S288c 1 7P38523	1e-33	GRPE_YEAST	N	N	0.697	0.554	Y	EG_transcript_21720	Y	Y
RCo039804	K22071	Mitochondrial biogenesis	Protein families: genetic information processing	Ferredoxin-2 (Fdx2)	WP_109793487.1 2Fe-2S iron-sulfur cluster binding domain-containing protein	7.1e-26	Minwuia thermotolerans	Q12184 Adrenodoxin homolog, mitochondrial S. cerevisiae S288c 3 0Q12184	2e-33	ADRX_YEAST	Y	N	0.92	0.974	Y	EG_transcript_29409	Y	Y
RCo018944	K17795	Mitochondrial biogenesis	Protein families: genetic information processing	Mitochondrial import inner membrane translocase subunit TIM17	KAF0980874.1 hypothetical protein FDP41_012662	4.5e-35	Naegleria fowleri	Q9SP35 Mitochondrial import inner membrane translocase subunit TIM17-2 A. thaliana 0 1Q9SP35	2e-31	TI172_ARATH	N	N	-	-	Y	EG_transcript_19555	N	Y
RCo033636	K01410	Mitochondrial biogenesis	Protein families: genetic information processing	Mitochondrial intermediate peptidase	XP_002491343.1 Mitochondrial intermediate peptidase	3.7e-35	Komagataella phaffii GS115	Q99797 Mitochondrial intermediate peptidase H. sapiens 0 1Q99797	6e-31	MIPEP_HUMAN	N	N	-	-	Y	EG_transcript_9396	N	Y
RCo035651	K09648	Mitochondrial biogenesis	Protein families: genetic information processing	Mitochondrial import inner membrane protease subunit 2 Imp2	XP_029190056.1 mitochondrial inner membrane protease subunit 2-like	3.9e-26	Acropora millepora	Q8BPT6 Mitochondrial inner membrane protease subunit 2 M. musculus 0 11Q8BPT6	2e-29	IMP2L_MOUSE	N	N	-	-	Y	EG_transcript_22314	N	Y
RCo012680	K22072	Mitochondrial biogenesis	Protein families: genetic information processing	Iron-sulfur cluster assembly 2 (ISCA 2)	XP_006184542.1 PREDICTED: iron-sulfur cluster assembly 2 homolog, mitochondrial isoform X3	2.5e-19	Camelus ferus	Q86U28 Iron-sulfur cluster assembly 2 homolog, mitochondrial H. sapiens 0 1Q86U28	4e-29	ISCA2_HUMAN	Y	N	0.873	0.946	Y	EG_transcript_36862	Y	Y
RCo034409	K23499	Mitochondrial biogenesis	Protein families: genetic information processing	Required for meiotic nuclear division protein 1	WP_068467488.1 sporulation protein RMD1	1.1e-45	Parachlamydia sp. C2	Q9NWS8 Required for meiotic nuclear division protein 1 homolog H. sapiens 1 0Q9NWS8	6e-29	RMND1_HUMAN	N	N	-	-	Y	EG_transcript_11231	N	Y
RCo004631	K12469	Mitochondrial biogenesis	Protein families: genetic information processing	Dynamin-1-like protein	CUE83139.1 dynamin, putative	2e-42	Bodo saltans	Q8BH64 EH domain-containing protein 2 M. musculus 0 3Q8BH64	1e-23	EHD2_MOUSE	Y	N	0.92	0.996	Y	EG_transcript_7126	Y	Y
RCo040312	K17803	Mitochondrial biogenesis	Protein families: genetic information processing	Methyltransferase OMS1	KFH62894.1 hypothetical protein MVEG_11418	1.5e-30	Mortierella verticillata NRRL 6337	Q06668 Methyltransferase OMS1, mitochondrial S. cerevisiae S288c 1 5Q06668	2e-23	OMS1_YEAST	Y	N	0.524	0.458	Y	EG_transcript_26805	Y	Y
RCo019252	K17783	Mitochondrial biogenesis	Protein families: genetic information processing	Sulfhydryl oxidase; ISC export system (Erv1)	CUG90656.1 Hypothetical protein, putative, partial	4.7e-22	Bodo saltans	P27882 Mitochondrial FAD-linked sulfhydryl oxidase ERV1 S. cerevisiae S288c 0 3P27882	3e-23	ERV1_YEAST	Y	N	-	-	N	-	N	N
RCo031025	K17783	Mitochondrial biogenesis	Protein families: genetic information processing	Sulfhydryl oxidase; ISC export system (Erv1)	XP_005539449.1 probable flavin-linked sulfhydryl oxidase ERV1	2.9e-18	Cyanidioschyzon merolae strain 10D	P55789 FAD-linked sulfhydryl oxidase ALR H. sapiens 1 0P55789	8e-19	ALR_HUMAN	Y	N	0.687	0.703	N	-	Y	N
RCo038486	K22066	Mitochondrial biogenesis	Protein families: genetic information processing	BolA-like protein 1	KAF0222619.1 BolA	5.1e-19	Rhodospirillaceae bacterium	Q9D8S9 BolA-like protein 1 M. musculus 0 19Q9D8S9	2e-18	BOLA1_MOUSE	N	N	-	-	Y	EG_transcript_35814	N	Y
RCo008554	K01412	Mitochondrial biogenesis	Protein families: genetic information processing	Complex III (ubiquinol-cytochrome c reductase) euglenozoa-specific core subunit 2	P43265.1 RecName: Full=Ubiquinol-cytochrome-c reductase complex core protein 2, mitochondrial; Flags: Precursor	8.3e-122	Euglena gracilis	Q9ZU25 Probable mitochondrial-processing peptidase subunit alpha-1 A. thaliana 0 7Q9ZU25	3e-18	MPPA1_ARATH	Y	N	0.886	0.862	Y	EG_transcript_12637	Y	Y
RCo040194	K09539	Mitochondrial biogenesis	Protein families: genetic information processing	Mitochondrial import inner membrane translocase subunit TIM14 (DNAJC19)	RKP11447.1 hypothetical protein BJ684DRAFT_21984	1.6e-12	Piptocephalis cylindrospora	Q96DA6 Mitochondrial import inner membrane translocase subunit TIM14 H. sapiens 0 2Q96DA6	4e-18	TIM14_HUMAN	Y	N	0.921	0.44	N	-	Y	N
RCo000652	K22072	Mitochondrial biogenesis	Protein families: genetic information processing	Iron-sulfur cluster assembly 2 (ISCA 2)	TXI18931.1 iron-sulfur cluster insertion protein ErpA	7.5e-52	Pelomonas sp.	Q9DCB8 Iron-sulfur cluster assembly 2 homolog, mitochondrial M. musculus 0 17Q9DCB8	9e-18	ISCA2_MOUSE	N	N	-	-	Y	EG_transcript_36862	N	Y
RCo054193	K22069	Mitochondrial biogenesis	Protein families: genetic information processing	ISC biogenesis desulfurase-interacting protein of 11 kDa (Isd11)	XP_030799229.1 LYR motif-containing protein 4	1.7e-13	Camarhynchus parvulus	Q6Q560 Protein ISD11 S. cerevisiae S288c 2 3Q6Q560	4e-17	ISD11_YEAST	Y	N	0.821	0.395	Y	EG_transcript_27059	Y	Y
RCo011520	K19054	Mitochondrial biogenesis	Protein families: genetic information processing	Frataxin (Fxn)	XP_011772023.1 frataxin-like, mitochondrial precursor, putative	1.3e-16	Trypanosoma brucei gambiense DAL972	O74831 Frataxin homolog, mitochondrial S. pombe 972h- 1 0O74831	7e-17	FRDA_SCHPO	Y	N	-	-	Y	EG_transcript_32001	N	Y
RCo026907	K17808	Mitochondrial biogenesis	Protein families: genetic information processing	Mitochondrial import inner membrane translocase subunit TIM15 (ZIM17, Hep1)	CCC46977.1 conserved hypothetical protein	1.2e-19	Trypanosoma vivax Y486	P42844 Mitochondrial protein import protein ZIM17 S. cerevisiae S288c 1 2P42844	1e-16	ZIM17_YEAST	N	N	0.703	-	N	-	Y	N
RCo002721	K18183	Mitochondrial biogenesis	Protein families: genetic information processing	Complex IV (cytochrome c oxidase) euglenozoa-specific assembly subunit 19	XP_828049.1 hypothetical protein, conserved	1.3e-19	Trypanosoma brucei brucei TREU927	Q3E731 Cytochrome c oxidase assembly protein COX19 S. cerevisiae S288c 1 0Q3E731	2e-16	COX19_YEAST	Y	N	-	-	Y	EG_transcript_54525	N	Y
RCo012261	K18798	Mitochondrial biogenesis	Protein families: genetic information processing	Peroxisome-assembly ATPase	OJT05366.1 Lactation elevated protein 1	6e-11	Trametes pubescens	O42895 Uncharacterized protein C115.02c S. pombe 972h- 1 0O42895	2e-15	YBQ2_SCHPO	N	N	0.482	0.964	N	-	Y	N
RCo027278	K18168	Mitochondrial biogenesis	Protein families: genetic information processing	Complex II (succinate dehydrogenase) assembly factor 2 (SDHAF2)	WP_014745143.1 succinate dehydrogenase assembly factor 2	9.6e-11	Tistrella mobilis	Q08230 Succinate dehydrogenase assembly factor 2, mitochondrial S. cerevisiae S288c 2 5Q08230	5e-15	SDHF2_YEAST	Y	N	0.785	0.928	Y	EG_transcript_26207	Y	Y
RCo027226	K09008	Mitochondrial biogenesis	Protein families: genetic information processing	Complex I (NADH dehydrogenase) 1 alpha subcomplex assembly factor 3 (NDUFAF3)	RZS24371.1 hypothetical protein BHM03_00057433	1.4e-10	Ensete ventricosum	Q9BU61 NADH dehydrogenase [ubiquinone]1 alpha subcomplex assembly factor 3 H. sapiens 0 3Q9BU61	4e-14	NDUF3_HUMAN	Y	N	-	-	Y	EG_transcript_27068	N	Y
RCo050585	K01410	Mitochondrial biogenesis	Protein families: genetic information processing	Mitochondrial intermediate peptidase	GET93541.1 mitochondrial intermediate peptidase, putative	2e-27	Leishmania tarentolae	P35999 Mitochondrial intermediate peptidase S. cerevisiae S288c 2 1P35999	6e-14	PMIP_YEAST	Y	N	0.829	0.985	Y	EG_transcript_9396	Y	Y
RCo002990	K03217	Mitochondrial biogenesis	Protein families: genetic information processing	Mitochondrial import inner membrane protein insertase Oxa1	XP_001242683.1 YidC/Oxa1 family membrane protein insertase	1.5e-12	Coccidioides immitis RS	Q2M1J6 Oxidase (Cytochrome c) assembly 1-like H. sapiens 0 1Q2M1J6	8e-14	Q2M1J6_HUMAN	Y	N	0.86	0.639	N	-	Y	N
RCo040196	K17981	Mitochondrial biogenesis	Protein families: genetic information processing	Mitochondrial fission process protein 1 (MTFP1)	CUI14874.1 Hypothetical protein, putative	3.2e-39	Bodo saltans	Q9UDX5 Mitochondrial fission process protein 1 H. sapiens 0 2Q9UDX5	1e-12	MTFP1_HUMAN	Y	N	-	-	Y	EG_transcript_20265	N	Y
RCo010625	K07556	Mitochondrial biogenesis	Protein families: genetic information processing	Complex V (F-type H+-transporting ATPase) assembly factor 2	CCC94402.1 unnamed protein product	6.4e-54	Trypanosoma congolense IL3000	Q91YY4 ATP synthase mitochondrial F1 complex assembly factor 2 M. musculus 0 13Q91YY4	3e-12	ATPF2_MOUSE	N	N	-	-	Y	EG_transcript_18536	N	Y
RCo012367	K15255	Mitochondrial biogenesis	Protein families: genetic information processing	ATP-dependent DNA helicase PIF1-like	XP_022315352.1 ATP-dependent DNA helicase PIF1-like	1.8e-81	Crassostrea virginica	Q7S9D6 Putative uncharacterized protein N. crassa OR74A 0 1Q7S9D6	3e-11	Q7S9D6_NEUCR	Y	N	0.838	0.673	Y	EG_transcript_7857	Y	Y
RCo030551	K07555	Mitochondrial biogenesis	Protein families: genetic information processing	Complex V (F-type H+-transporting ATPase) assembly factor 1	CUG89912.1 Hypothetical protein, putative	6.1e-49	Bodo saltans	I3L448 ATP synthase mitochondrial F1 complex assembly factor 1 H. sapiens 0 2I3L448	1e-09	I3L448_HUMAN	N	N	-	-	Y	EG_transcript_24567	N	Y
RCo000130	K03686	Mitochondrial biogenesis	Protein families: genetic information processing	Molecular chaperone DnaJ	GET87742.1 hypothetical protein, conserved	1.4e-09	Leishmania tarentolae	Q96LL9 DnaJ homolog subfamily C member 30 H. sapiens 1 1Q96LL9	9e-09	DJC30_HUMAN	N	N	0.558	0.641	Y	EG_transcript_23954	Y	Y
RCo046267	K04082	Mitochondrial biogenesis	Protein families: genetic information processing	Molecular chaperone HscB (Jac1)	RMD71719.1 Fe-S protein assembly co-chaperone HscB	1.3e-07	Gammaproteobacteria bacterium	Q8K3A0 Iron-sulfur cluster co-chaperone protein HscB, mitochondrial M. musculus 0 12Q8K3A0	2e-08	HSC20_MOUSE	N	N	-	-	Y	EG_transcript_25197	N	Y
RCo026412	K17065	Mitochondrial biogenesis	Protein families: genetic information processing	Dynamin-1-like protein	OLQ13280.1 hypothetical protein AK812_SmicGene2657	1.7e-09	Symbiodinium microadriaticum	E9PUD2 Dynamin-1-like protein M. musculus 0 1E9PUD2	2e-08	E9PUD2_MOUSE	Y	N	0.716	-	N	-	Y	N
RCo035157	K17790	Mitochondrial biogenesis	Protein families: genetic information processing	Mitochondrial import inner membrane translocase subunit TIM22	KAA6421926.1 THUMP domain-containing	6.1e-10	Trebouxia sp. A1-2	Pygsuia biforma Tim22 homologue	1e-06	Pyg_Tim22	Y	N	-	-	Y	EG_transcript_31130	N	Y
RCo011516	K17794	Mitochondrial biogenesis	Protein families: genetic information processing	Mitochondrial import inner membrane translocase subunit TIM23	GAQ79356.1 translocase of inner mitochondrial membrane 23	5.5e-08	Klebsormidium nitens	Q9USM7 Mitochondrial import inner membrane translocase subunit tim23 S. pombe 972h- 1 0Q9USM7	7e-06	TIM23_SCHPO	Y	N	-	-	Y	EG_transcript_18447	N	Y
RCo038343	-	Mitochondrial biogenesis	Protein families: genetic information processing	Complex III (ubiquinol-cytochrome c reductase) assembly factor CBP3	EIF48817.1 protein required for assembly of ubiquinol cytochrome-c reductase complex (cytochrome bc1 complex)	0.00092	Brettanomyces bruxellensis AWRI1499	A6PWX7 Ubiquinol-cytochrome c reductase complex chaperone CBP3 homolog M. musculus 0 15A6PWX7	6e-05	A6PWX7_MOUSE	N	N	0.537	-	Y	EG_transcript_22479	Y	Y
RCo050551	K07277	Mitochondrial biogenesis	Protein families: genetic information processing	Mitochondrial import outer membrane translocase Tob55 (Sam50)	-	-	-	-	-	-	N	N	-	-	Y	EG_transcript_10631	N	Y
RCo028842	-	Mitochondrial biogenesis	Protein families: genetic information processing	Complex IV (cytochrome c oxidase) euglenozoa-specific assembly subunit 6b (12)	-	-	-	-	-	-	N	N	-	-	Y	EG_transcript_15660	N	Y
RCo005874	-	Mitochondrial biogenesis	Protein families: genetic information processing	Mitochondrial import outer membrane translocase subunit TOM40-like protein	-	-	-	-	-	-	N	N	-	-	Y	EG_transcript_18731	N	Y
RCo010151	K14998	Mitochondrial biogenesis	Protein families: genetic information processing	Cytochrome c oxidase assembly factor SURF1	-	-	-	-	-	-	N	N	-	-	Y	EG_transcript_20811	N	Y
RCo035852	-	Mitochondrial biogenesis	Protein families: genetic information processing	Mitochondrial import inner membrane translocase subunit Pam16	-	-	-	-	-	-	N	N	0.767	0.473	Y	EG_transcript_25323	N	Y
RCo040213	K17805	Mitochondrial biogenesis	Protein families: genetic information processing	Mitochondrial import inner membrane translocase subunit TIM16	-	-	-	-	-	-	Y	N	-	-	Y	EG_transcript_30166	N	Y
RCo035673	-	Mitochondrial biogenesis	Protein families: genetic information processing	Mitochondrial import inner membrane translocase subunit Tim44	-	-	-	-	-	-	Y	N	-	-	Y	EG_transcript_9636	N	Y
RCo033854	K17969	Mitochondrial biogenesis	Protein families: genetic information processing	Mitochondrial fission 1 protein (FIS1 homolog)	-	-	-	-	-	-	Y	N	-	-	N	-	N	N
RCo022175	-	Mitochondrial biogenesis	Protein families: genetic information processing	Mitochondrial import inner membrane translocase subunit Tim 8-13	-	-	-	-	-	-	N	N	-	-	N	-	N	N
RCo001192	K17496	Mitochondrial biogenesis	Protein families: genetic information processing	Mitochondrial import inner membrane translocase subunit TIM50 (weak homology)	-	-	-	-	-	-	Y	N	-	-	N	-	N	N
RCo012448	-	Mitochondrial biogenesis	Protein families: genetic information processing	Mitochondrial import outer membrane archaic translocase 69 kDa subunit (ATOM69)	-	-	-	-	-	-	N	N	-	-	N	-	N	N
RCo012450	-	Mitochondrial biogenesis	Protein families: genetic information processing	Mitochondrial import outer membrane archaic translocase 69 kDa subunit (ATOM69)	-	-	-	-	-	-	Y	N	-	-	N	-	N	N
RCo000369	-	Mitochondrial biogenesis	Protein families: genetic information processing	Mitochondrial import inner membrane translocase subunit Tim 8-13	RHY26210.1 hypothetical protein DYB32_007801	0.0004	Aphanomyces invadans	-	-	-	Y	N	-	-	N	-	N	N
RCo035935	-	Mitochondrial biogenesis	Protein families: genetic information processing	Complex I (NADH dehydrogenase) assembly factor, chaperone DnaJ	XP_005536905.1 probable chaperone protein DnaJ	0.00025	Cyanidioschyzon merolae strain 10D	-	-	-	N	N	0.741	0.555	Y	EG_transcript_19437	N	Y
RCo035243	-	Mitochondrial biogenesis	Protein families: genetic information processing	Mitochondrial import outer membrane translocase Tob55 (Sam50)	PWU95266.1 putative Tob55	0.00015	Trypanosoma cruzi	-	-	-	N	N	-	-	Y	EG_transcript_8016	N	Y
[truncated: 898 more rows]

## Sheet: Table S8
Protein	Accession number	Organism	Rhabdomonas genome contig	E-value
cob	ALQ28773.1	Euglena gracilis strain Z	NODE_69056_length_679_cov_5.04891_ID_2143281	2e-55
[truncated: 66 more rows]
